# Supplementary material for: Histone demethylase JMJD2D emerges as a novel prognostic biomarker and exhibits correlation with immune infiltration in lung adenocarcinoma
Source: Discov Oncol. 2025 Jun 12;16:1072. doi: 10.1007/s12672-025-02871-y (PMC12162437; doi:10.1007/s12672-025-02871-y)
Supplement: Supplementary file 1 — Supplementary Material 1. [file 12672_2025_2871_MOESM1_ESM.xlsx]

## Sheet: Sheet1
Table S1 DEGs between high-JMJD2D and low-JMJD2D groups.
Tables S2 GSEA of the immune related GO-BP.
Table S3 IC50 values of each drugs for each sample based on the GDSC database.
Table S4_Correlation of JMJD2D with IC50
Table S5 DEGs between Tumor and Normal in TCGA-LUAD cohort.

## Sheet: Tables S1
Table S1 DEGs between high-JMJD2D and low-JMJD2D groups.
	Symbol	logFC	AveExpr	t	P.Value	adj.P.Val	B
KDM4D	KDM4D	0.9355	4.3035	25.5261	2.63496e-91	6.18372e-87	186.465
AKAP3	AKAP3	0.567754	3.58206	6.13816	1.75534e-09	2.05972e-05	11.1995
FBXW11P1	FBXW11P1	0.585291	2.60084	5.95786	4.96208e-09	2.91125e-05	10.2301
INHBC	INHBC	0.537998	1.53026	5.655	2.68546e-08	0.000116917	8.6578
SMC1B	SMC1B	0.830902	3.11123	5.40848	1.00629e-07	0.000236155	7.43064
SCIN	SCIN	-0.61019	5.62646	-5.35838	1.30834e-07	0.000261434	7.18715
SNHG31	SNHG31	0.526432	3.62168	5.17676	3.33147e-07	0.000384027	6.32117
ELOVL3	ELOVL3	0.647491	3.85026	5.00699	7.78988e-07	0.000585016	5.53573
FOXE1	FOXE1	1.00772	2.9822	5.00314	7.93932e-07	0.000585016	5.51818
DIP2C-AS1	DIP2C-AS1	-0.707682	2.51524	-4.96564	9.54637e-07	0.000658924	5.34796
AKR7A3	AKR7A3	-0.63845	5.29528	-4.8743	1.48833e-06	0.00081228	4.93821
AMBP	AMBP	-0.830246	4.34077	-4.83477	1.79991e-06	0.000890577	4.76298
NR0B2	NR0B2	-0.795265	4.67119	-4.57823	5.98734e-06	0.00186063	3.65733
SYT16	SYT16	0.61137	1.95521	4.53445	7.31038e-06	0.00204503	3.4741
ZNF30-AS1	ZNF30-AS1	0.535216	2.00713	4.3544	1.6335e-05	0.00342177	2.73763
BARX1-DT	BARX1-DT	-0.816828	1.82773	-4.35244	1.6476e-05	0.00342177	2.72977
SPINK1	SPINK1	-0.574865	6.72134	-4.34213	1.72379e-05	0.00347663	2.68844
FUT6	FUT6	-0.740505	4.17642	-4.32973	1.81985e-05	0.00358892	2.63886
RNU6-1263P	RNU6-1263P	0.715161	1.18313	4.32417	1.86458e-05	0.0036465	2.61667
FOXA3	FOXA3	-0.595268	5.36501	-4.32115	1.88934e-05	0.00366438	2.60461
TCAM1P	TCAM1P	0.759279	2.26704	4.28594	2.20174e-05	0.0040338	2.46481
ZNF114	ZNF114	0.606583	4.0029	4.13214	4.24373e-05	0.00589301	1.86643
BAALC-AS2	BAALC-AS2	-0.593007	2.49846	-4.05404	5.87619e-05	0.00737447	1.57037
REELD1	REELD1	0.644282	3.10544	4.02769	6.55053e-05	0.00784326	1.47167
CDKN2A-DT	CDKN2A-DT	0.534084	1.31497	3.98972	7.65265e-05	0.00843157	1.33049
PLA2G2A	PLA2G2A	-0.539907	4.94361	-3.97411	8.15489e-05	0.0088193	1.27281
MGAT5B	MGAT5B	0.513036	2.83483	3.93822	9.43085e-05	0.00979307	1.141
PLAC1	PLAC1	0.61342	3.12563	3.92862	9.80322e-05	0.0101349	1.10591
C4BPB	C4BPB	-0.600464	4.95169	-3.90668	0.000107062	0.0106372	1.02608
RNF183	RNF183	-0.677868	3.58897	-3.9065	0.00010714	0.0106372	1.02543
RBX1P2	RBX1P2	0.587377	3.54863	3.90254	0.000108853	0.0107334	1.01107
HABP2	HABP2	-0.61988	5.53757	-3.88233	0.000118008	0.0113336	0.937956
FAM177B	FAM177B	-0.510624	4.35303	-3.84065	0.000139241	0.0124177	0.788286
CASC16	CASC16	-0.540168	1.94276	-3.83331	0.000143336	0.0125988	0.762088
ZYG11A	ZYG11A	0.593088	3.94168	3.82046	0.000150777	0.0130089	0.716346
C8B	C8B	-0.690427	3.10589	-3.80991	0.00015716	0.0133631	0.678886
MNX1-AS2	MNX1-AS2	-0.644417	4.25235	-3.78283	0.000174728	0.0142956	0.583193
OR7E62P	OR7E62P	0.561098	1.30252	3.77906	0.000177314	0.014349	0.569934
SLC26A4-AS1	SLC26A4-AS1	-0.565502	2.04986	-3.7688	0.00018454	0.014631	0.533886
GSTA1	GSTA1	-0.573344	6.05166	-3.765	0.000187291	0.0146512	0.520533
PAEP	PAEP	-0.799789	5.21687	-3.75462	0.000194989	0.0149609	0.484198
CCDC198	CCDC198	-0.691037	2.02841	-3.73028	0.000214226	0.015754	0.399357
LDHC	LDHC	0.692202	2.5326	3.70681	0.000234464	0.016674	0.318018
TOX3	TOX3	-0.527514	5.88742	-3.70228	0.000238575	0.0168641	0.302364
C20orf197	C20orf197	-0.5405	3.8577	-3.68656	0.000253362	0.0175395	0.248216
CFTR	CFTR	-0.550969	4.87223	-3.6692	0.000270691	0.0182545	0.188673
CLDN10-AS1	CLDN10-AS1	-0.827607	3.92343	-3.65449	0.000286239	0.0189224	0.138433
LILRP1	LILRP1	-0.535229	1.43474	-3.62973	0.000314324	0.0199536	0.054284
HGD	HGD	-0.538609	5.56458	-3.6041	0.000346104	0.0214311	-0.0322391
FOXCUT	FOXCUT	0.622263	2.36524	3.59232	0.000361707	0.0219342	-0.0718297
LY6K	LY6K	0.75469	4.27404	3.5916	0.000362681	0.0219366	-0.0742422
PLAC4	PLAC4	-0.51964	1.41597	-3.5824	0.000375346	0.0222218	-0.10505
OR7E91P	OR7E91P	0.529473	2.0116	3.5819	0.000376042	0.0222218	-0.106711
SNAP23P1	SNAP23P1	0.557547	2.21496	3.58042	0.000378124	0.0222401	-0.111666
FZD9	FZD9	0.600576	3.5217	3.56639	0.000398389	0.023088	-0.158501
RN7SL221P	RN7SL221P	0.508281	3.76613	3.55065	0.000422335	0.023775	-0.210841
MIR659	MIR659	0.64726	3.35238	3.53622	0.000445448	0.0242547	-0.258595
TNNI3	TNNI3	0.683346	4.01624	3.53505	0.000447373	0.0243031	-0.262459
GJB1	GJB1	-0.626971	5.59697	-3.52822	0.000458776	0.0246602	-0.285008
MAJIN	MAJIN	0.566414	2.34323	3.50974	0.000491001	0.025159	-0.345801
TRPM8	TRPM8	-0.625402	3.1532	-3.47848	0.000550382	0.0264444	-0.447954
PIK3C2G	PIK3C2G	-0.601005	1.99607	-3.45943	0.000589781	0.0274622	-0.509766
RNU1-134P	RNU1-134P	-0.607246	2.09899	-3.43646	0.000640802	0.0291441	-0.583888
SERPINA3	SERPINA3	-0.533261	2.37156	-3.4302	0.000655401	0.029693	-0.604003
CLDN2	CLDN2	-0.595126	5.18096	-3.40815	0.000709338	0.0313405	-0.674582
SPINK4	SPINK4	-0.683784	2.88462	-3.38706	0.00076478	0.0325732	-0.741693
CTNND2	CTNND2	-0.619454	2.84105	-3.36432	0.00082907	0.0341344	-0.813616
ELAVL2	ELAVL2	0.513786	2.00236	3.3542	0.000859248	0.0348873	-0.845455
TFPI2-DT	TFPI2-DT	0.5803	2.66252	3.34964	0.000873187	0.0351188	-0.859781
BNIP3P17	BNIP3P17	0.513432	3.57955	3.34006	0.000903152	0.0357423	-0.889812
KRT16P1	KRT16P1	-0.582536	3.3438	-3.28942	0.00107805	0.0399677	-1.04718
IL36RN	IL36RN	0.647509	3.01774	3.2794	0.0011162	0.0406816	-1.07806
SLC6A11	SLC6A11	0.59555	2.09842	3.27722	0.00112467	0.0408336	-1.08477
TENM1	TENM1	-0.529235	2.90224	-3.23869	0.0012844	0.0438752	-1.20257
BPIFB1	BPIFB1	-0.515995	6.36995	-3.23254	0.00131173	0.0442218	-1.22123
DUSP9	DUSP9	0.563599	3.50619	3.22377	0.00135166	0.0450579	-1.24779
BPIFB4	BPIFB4	-0.560124	1.85388	-3.21667	0.00138483	0.0455171	-1.26926
ALOXE3P1	ALOXE3P1	-0.500387	1.84074	-3.19812	0.00147509	0.0473288	-1.32515
HP	HP	-0.536354	5.51365	-3.19473	0.00149212	0.0475508	-1.33531
DLX6	DLX6	0.575663	1.95305	3.17594	0.00159004	0.0490989	-1.39152
RERGL	RERGL	-0.511896	2.91798	-3.17423	0.00159928	0.0492544	-1.39664
NUS1P2	NUS1P2	0.522743	2.90749	3.13522	0.00182301	0.0532781	-1.51228
YBX2	YBX2	0.531851	4.10685	3.12431	0.00189056	0.0547074	-1.54438
HNF1A	HNF1A	-0.592303	2.6173	-3.12074	0.00191317	0.0552254	-1.55486
SLC14A2	SLC14A2	-0.596142	2.20657	-3.05425	0.00238223	0.0625993	-1.74793
MIR4257	MIR4257	-0.629844	2.63184	-3.04501	0.00245515	0.0639483	-1.77444
HSD17B2	HSD17B2	-0.50366	2.79173	-3.01626	0.00269552	0.0670823	-1.85646
IGF2BP3	IGF2BP3	0.51384	4.25172	2.97399	0.00308818	0.0715639	-1.97567
SP8	SP8	0.592894	2.39164	2.91495	0.00372444	0.0792064	-2.13946
ITPRID1	ITPRID1	-0.547316	2.27232	-2.91372	0.00373889	0.0792064	-2.14284
EPS8L3	EPS8L3	-0.630441	2.23231	-2.91145	0.00376574	0.0793307	-2.14909
BPIFA1	BPIFA1	-0.537202	6.29798	-2.8735	0.00424034	0.085199	-2.25259
BPIFB2	BPIFB2	-0.644934	3.6874	-2.80888	0.00517499	0.094954	-2.42578
RNU6-678P	RNU6-678P	0.522354	2.71463	2.80272	0.00527329	0.0961566	-2.44211
TFF1	TFF1	-0.661975	4.7447	-2.79787	0.00535182	0.0966871	-2.45493
CLDN6	CLDN6	0.574219	4.11595	2.77237	0.00578224	0.100859	-2.52197
RNY1	RNY1	-0.53686	1.84332	-2.77223	0.00578471	0.100859	-2.52234
MIR5698	MIR5698	0.513991	1.30418	2.70755	0.00702106	0.112625	-2.68974
KLK12	KLK12	-0.626257	3.45161	-2.69371	0.00731476	0.115287	-2.72507
FGL1	FGL1	-0.553925	4.6818	-2.6632	0.00800135	0.120912	-2.80231
HNF1A-AS1	HNF1A-AS1	-0.506636	2.822	-2.5956	0.00973295	0.134159	-2.97042
CALCA	CALCA	-0.592788	3.14073	-2.55766	0.0108454	0.139247	-3.06294
DEFB4A	DEFB4A	-0.530231	2.13387	-2.53087	0.0116978	0.144563	-3.12748
MIR4786	MIR4786	0.507013	3.30194	2.50277	0.0126552	0.150597	-3.19444
MIR3189	MIR3189	-0.507849	5.07714	-2.49131	0.0130655	0.153541	-3.22155
HMGA1P5	HMGA1P5	-0.517044	3.5955	-2.4756	0.0136467	0.15716	-3.2585
RNY4P19	RNY4P19	-0.529616	3.5254	-2.45968	0.014259	0.160607	-3.29572
RNU6-438P	RNU6-438P	0.535676	2.45129	2.43455	0.0152755	0.165506	-3.35402
DSCAM-AS1	DSCAM-AS1	-0.582306	2.11111	-2.19018	0.0289938	0.231148	-3.89025

## Sheet: Tables S2
Tables S2 GSEA of the immune related GO-BP.
	ID	Description	setSize	enrichmentScore	NES	pvalue	p.adjust	qvalues	rank	leading_edge	core_enrichment
GO:0006959	GO:0006959	humoral immune response	234	-0.588905	-2.2454	5.85525e-16	1.04165e-12	8.83218e-13	5544	tags=59%, list=24%, signal=45%	28401/128821/28815/683/3502/28797/1379/28439/3538/1604/28442/7942/325/3576/3501/5788/3514/28429/28423/3346/28444/3539/719/4069/28468/1236/6441/4239/28408/28984/10417/27242/28776/28392/602/2213/240/28834/3494/54209/102723169/28813/28452/28454/124976/6357/5266/28908/28796/28816/7448/5197/28409/28388/27202/4068/116842/8346/28778/28903/28426/1668/28449/930/28424/10563/57119/3503/596/28450/140686/326/…
GO:0002455	GO:0002455	humoral immune response mediated by circulating immunoglobulin	85	-0.670703	-2.21447	5.15954e-10	1.21362e-07	1.02903e-07	5544	tags=76%, list=24%, signal=59%	28401/28815/3502/28797/28439/3538/1604/28442/325/3501/5788/3514/28429/28423/28444/3539/28468/28408/28776/28392/602/2213/28834/3494/102723169/28813/28452/28454/28908/28796/28816/28409/28388/28778/28903/28426/28449/28424/3503/28450/28464/3543/28466/28874/1380/28457/28461/28445/28930/28420/28400/730/28916/3542/28432/28447/28876/388077/722/28385/1378/2208/729/725/732
GO:0016064	GO:0016064	immunoglobulin mediated immune response	126	-0.605079	-2.13389	1.48647e-09	2.83332e-07	2.40239e-07	5544	tags=60%, list=24%, signal=46%	28401/28815/3502/28797/28439/3598/3538/1604/28442/325/3501/5788/3514/28429/28423/28444/3539/28468/28408/28776/28392/602/2213/28834/3494/102723169/28813/28452/28454/28908/28796/28816/28409/28388/695/57379/28778/28903/28426/28449/930/28424/3503/28450/28464/3543/959/28466/28874/1380/28457/28461/28445/28930/28420/940/28400/202309/3586/1235/730/28916/3542/28432/28447/28876/388077/722/28385/1378/2208/9…
GO:0002250	GO:0002250	adaptive immune response	425	-0.511026	-2.04988	1.35802e-16	3.62388e-13	3.0727e-13	5544	tags=43%, list=24%, signal=34%	28401/28815/8417/28614/6974/26022/3502/28797/942/28585/64167/28439/4067/177/3598/915/3538/51744/1604/28442/7942/28666/325/8809/10288/3501/5788/3514/28429/28423/28685/28444/3539/28468/28408/6363/80758/27242/28776/5579/28392/28885/602/563/28558/2213/28834/50856/3494/10859/619207/441864/102723169/28813/3554/64092/28452/28671/28454/8832/28908/83953/28796/28574/28785/28816/28669/28409/28388/9173/23180…
GO:0002920	GO:0002920	regulation of humoral immune response	75	-0.632082	-2.04103	3.68036e-07	2.76649e-05	2.34572e-05	5522	tags=76%, list=24%, signal=58%	28815/3502/28797/1379/28439/3538/1604/28442/3501/5788/3514/3539/719/1236/28776/28392/2213/28834/28813/28452/28454/124976/28908/28796/28816/7448/27202/28778/28903/28449/930/28424/10563/3503/28450/28874/1380/28457/28461/28930/1369/28420/730/28916/5199/3542/28876/5650/388077/722/1378/2147/1361/2208/729/725/732
GO:0002460	GO:0002460	adaptive immune response based on somatic recombination of immune receptors built from immunoglobulin superfamily domains	218	-0.523641	-1.97649	7.64634e-10	1.58577e-07	1.34458e-07	5544	tags=47%, list=24%, signal=36%	28401/28815/8417/26022/3502/28797/28439/177/3598/3538/1604/28442/325/8809/3501/5788/3514/28429/28423/28444/3539/28468/28408/6363/28776/28392/602/563/2213/28834/3494/10859/619207/102723169/28813/3554/28452/28454/28908/28796/28816/28409/28388/9173/23180/695/57379/7099/51176/114836/28778/3575/11035/28903/28426/941/64332/28449/930/28424/10563/3503/28450/326/28464/3543/339390/959/28466/28874/1380/910/…
GO:0002253	GO:0002253	activation of immune response	352	-0.484714	-1.91822	2.35841e-11	1.14426e-08	9.70221e-09	5544	tags=36%, list=24%, signal=28%	28401/28815/3502/28797/1240/1379/28439/4067/915/3538/1604/28442/325/3501/5788/3514/28429/28423/28444/3539/5567/719/28468/1236/2209/4239/28408/9844/28984/27242/28776/5579/5142/28392/9402/2213/3384/28834/11314/50856/3494/102723169/28813/28452/4332/28454/26191/118430/28908/28796/28816/7448/28409/28388/23180/695/58484/7294/2268/7099/27202/4068/973/3702/28778/28903/28426/84106/2357/64332/28449/930/284…
GO:0002764	GO:0002764	immune response-regulating signaling pathway	320	-0.471319	-1.85618	8.00964e-10	1.58577e-07	1.34458e-07	5544	tags=36%, list=24%, signal=28%	28401/28815/3502/28797/1240/28439/4067/915/3538/5599/28442/10288/3501/5788/3514/28429/28423/28444/3539/5567/719/28468/1236/2209/28408/9844/27242/28776/5579/5142/28392/9402/2213/3384/28834/11314/50856/3494/10859/102723169/28813/28452/4332/28454/26191/118430/945/28908/28796/28816/28409/28388/23180/695/7294/2268/27202/4068/973/3702/2353/28778/28903/28426/84106/2357/64332/28449/930/28424/3503/596/508…
GO:0002768	GO:0002768	immune response-regulating cell surface receptor signaling pathway	318	-0.471942	-1.85535	5.92381e-10	1.31731e-07	1.11695e-07	5544	tags=36%, list=24%, signal=27%	28401/28815/3502/28797/1240/28439/4067/915/3538/5599/28442/10288/3501/5788/3514/28429/28423/28444/3539/5567/719/28468/1236/2209/28408/9844/27242/28776/5579/5142/28392/9402/2213/3384/28834/11314/50856/3494/10859/102723169/28813/28452/4332/28454/26191/118430/28908/28796/28816/28409/28388/23180/695/7294/2268/27202/4068/973/3702/2353/28778/28903/28426/84106/2357/64332/28449/930/28424/3503/596/50852/2…
GO:0002429	GO:0002429	immune response-activating cell surface receptor signaling pathway	300	-0.467659	-1.82674	1.14996e-08	1.61508e-06	1.36943e-06	5544	tags=35%, list=24%, signal=27%	28401/28815/3502/28797/1240/28439/4067/915/3538/28442/3501/5788/3514/28429/28423/28444/3539/5567/719/28468/1236/2209/28408/9844/27242/28776/5579/5142/28392/9402/2213/3384/28834/11314/50856/3494/102723169/28813/28452/4332/28454/26191/118430/28908/28796/28816/28409/28388/23180/695/7294/2268/27202/4068/973/3702/28778/28903/28426/84106/2357/64332/28449/930/28424/3503/596/50852/28450/28464/3543/28466/…
GO:0002757	GO:0002757	immune response-activating signal transduction	300	-0.467659	-1.82674	1.14996e-08	1.61508e-06	1.36943e-06	5544	tags=35%, list=24%, signal=27%	28401/28815/3502/28797/1240/28439/4067/915/3538/28442/3501/5788/3514/28429/28423/28444/3539/5567/719/28468/1236/2209/28408/9844/27242/28776/5579/5142/28392/9402/2213/3384/28834/11314/50856/3494/102723169/28813/28452/4332/28454/26191/118430/28908/28796/28816/28409/28388/23180/695/7294/2268/27202/4068/973/3702/28778/28903/28426/84106/2357/64332/28449/930/28424/3503/596/50852/28450/28464/3543/28466/…
GO:0050778	GO:0050778	positive regulation of immune response	471	-0.449536	-1.82225	1.82076e-11	9.7174e-09	8.23942e-09	5544	tags=34%, list=24%, signal=26%	28401/28815/8417/57126/3502/23705/28797/942/1240/1379/28439/4067/915/3538/1604/28442/325/8809/3501/5788/3514/28429/28423/28444/3539/5724/5567/719/28468/1236/2209/4239/28408/6363/9844/10125/28984/10417/27242/28776/5579/5142/28392/9402/563/2213/3384/28834/11314/50856/3494/10859/102723169/28813/3554/28452/4332/28454/26191/118430/28908/28796/51704/7474/28816/7448/28409/28388/127540/23180/695/58484/38…
GO:0002697	GO:0002697	regulation of immune effector process	282	-0.467243	-1.81739	3.25408e-08	3.77544e-06	3.20121e-06	5522	tags=41%, list=24%, signal=32%	28815/8417/57126/3502/23705/28797/942/1379/28439/4067/177/3598/3538/51744/1604/28442/8809/3501/5788/3514/3539/5724/719/6363/10125/10417/28776/3162/28392/563/2213/28834/11314/10859/336/28813/3554/28452/28454/26191/8832/28908/28796/51704/7474/28816/7448/3567/695/388325/2268/7099/27202/114836/4068/28778/3952/3575/11035/28903/84106/941/64332/28449/930/28424/3503/335/28450/2294/30817/339390/959/28874/…
GO:0002440	GO:0002440	production of molecular mediator of immune response	182	-0.488263	-1.81457	1.80728e-06	0.000113476	9.62168e-05	4490	tags=37%, list=19%, signal=30%	10417/28776/3162/28885/2213/10859/336/28813/3554/9452/26191/28908/28796/51704/28785/7474/28816/3567/28669/695/388325/57379/7099/28778/3575/28903/28770/28774/335/28784/959/28811/28874/354/28930/28869/51237/940/28904/202309/116449/3586/28814/1235/28916/28799/1991/11213/28891/28892/28902/28906/28786/28876/28826/5650/1178/28931/3815/2867/28877/948/28875/28870/28900/28772/9245
GO:0002433	GO:0002433	immune response-regulating cell surface receptor signaling pathway involved in phagocytosis	90	-0.533844	-1.7779	9.7685e-05	0.00250647	0.00212524	5522	tags=43%, list=24%, signal=33%	28815/3502/28797/28439/4067/3538/28442/3501/5788/3514/3539/2209/9844/28776/28392/2213/28834/28813/28452/28454/28908/28796/28816/2268/28778/28903/28449/28424/3503/28450/28874/28457/28461/28930/28420/28916/3542/28876/388077
GO:0061844	GO:0061844	antimicrobial humoral immune response mediated by antimicrobial peptide	50	-0.575618	-1.76286	0.00145244	0.020782	0.0176211	2946	tags=40%, list=13%, signal=35%	8346/1668/10563/653423/2921/1670/354/10407/6283/5967/1991/6374/5650/1669/5196/4057/2147/1672/1673/51297
GO:0002220	GO:0002220	innate immune response activating cell surface receptor signaling pathway	81	-0.525538	-1.72101	0.000189595	0.004147	0.00351626	1425	tags=12%, list=6%, signal=12%	338339/2219/140453/4585/2867/4588/11027/56667/4586/4584
GO:0002758	GO:0002758	innate immune response-activating signal transduction	81	-0.525538	-1.72101	0.000189595	0.004147	0.00351626	1425	tags=12%, list=6%, signal=12%	338339/2219/140453/4585/2867/4588/11027/56667/4586/4584
GO:0002275	GO:0002275	myeloid cell activation involved in immune response	365	-0.426062	-1.69096	3.15897e-07	2.4434e-05	2.07177e-05	4847	tags=24%, list=21%, signal=19%	1536/5908/84418/5724/719/4069/4680/64333/23250/10125/847/7130/3162/22918/240/11314/54209/441864/79930/4332/2352/8832/945/3687/10788/695/6616/2268/11001/5294/6518/3101/6515/84106/968/2357/1118/2294/30817/26/222487/160364/326624/401258/51316/932/79895/10396/671/56670/5023/6283/338339/1511/10326/3929/5199/2219/25797/1991/640/84766/6947/5787/3934/1669/1084/199675/3815/5317/3579/948/5284/1378/4057/631…
GO:0002251	GO:0002251	organ or tissue specific immune response	27	-0.640314	-1.69002	0.00334551	0.0370435	0.0314093	723	tags=41%, list=3%, signal=40%	8346/1668/1670/1669/2867/5284/4057/9245/1672/92747/51297
GO:0002366	GO:0002366	leukocyte activation involved in immune response	468	-0.41346	-1.67538	3.88424e-08	4.31879e-06	3.66192e-06	4847	tags=27%, list=21%, signal=22%	683/26022/57126/942/81567/4067/3598/51744/126014/1604/9535/8809/10288/5788/54518/1536/5908/84418/5724/719/4069/4680/64333/6363/23250/10125/847/7130/3162/22918/602/2213/240/11314/10859/54209/4242/441864/79930/9452/4332/2352/8832/945/3687/10788/695/4064/6616/57379/2268/7099/11001/51176/114836/100431172/5294/6518/3101/6515/84106/941/968/2357/64332/1118/930/2294/30817/26/959/222487/56832/160364/32662…
GO:0002263	GO:0002263	cell activation involved in immune response	469	-0.412939	-1.67366	2.46731e-08	3.02493e-06	2.56485e-06	4847	tags=25%, list=21%, signal=20%	8809/10288/5788/54518/1536/5908/84418/5724/719/4069/4680/64333/6363/23250/10125/847/7130/3162/22918/602/2213/240/11314/10859/54209/4242/441864/79930/9452/4332/2352/8832/945/3687/10788/695/4064/6616/57379/2268/7099/11001/51176/114836/100431172/5294/6518/3101/6515/84106/941/968/2357/64332/1118/930/2294/30817/26/959/222487/56832/160364/326624/401258/51316/932/79895/10396/1880/671/56670/940/5023/6283…
GO:0002283	GO:0002283	neutrophil activation involved in immune response	327	-0.417459	-1.64094	3.94827e-06	0.000210719	0.000178669	3183	tags=17%, list=14%, signal=14%	6616/2268/11001/6518/3101/6515/84106/968/2357/1118/26/222487/160364/326624/401258/51316/932/79895/10396/671/5023/6283/338339/1511/10326/5199/2219/25797/1991/84766/6947/5787/3934/1669/1084/199675/5317/3579/948/5284/1378/4057/6317/4317/84658/56729/11027/2215/5004/5005/3577/10562/12/3240
GO:0002218	GO:0002218	activation of innate immune response	101	-0.461593	-1.57081	0.00177711	0.0239506	0.0203078	1425	tags=10%, list=6%, signal=9%	338339/2219/140453/4585/2867/4588/11027/56667/4586/4584
GO:0002699	GO:0002699	positive regulation of immune effector process	144	-0.417901	-1.51843	0.00267269	0.0321264	0.0272401	5497	tags=35%, list=23%, signal=27%	8417/57126/23705/942/4067/3598/51744/8809/5788/5724/6363/10125/10417/3162/563/11314/10859/3554/26191/8832/51704/7474/3567/695/388325/2268/7099/114836/4068/941/64332/2294/30817/910/51237/940/909/116449/3929/89870/640/913/911/5650/2867/948/2208/50487/5105/729
GO:0045089	GO:0045089	positive regulation of innate immune response	140	-0.402035	-1.45116	0.00480332	0.049204	0.0417203	3784	tags=18%, list=16%, signal=15%	3384/50856/4332/118430/7474/127540/58484/7294/7099/114836/4068/56832/4321/116449/338339/3929/2219/140453/4585/2867/4588/11027/56667/4586/4584
GO:0002683	GO:0002683	negative regulation of immune system process	293	-0.369784	-1.44242	0.000977599	0.0151206	0.0128208	4386	tags=26%, list=19%, signal=21%	121504/7107/29909/3162/8366/2213/7940/11314/10859/336/3398/441864/8361/406955/9306/64092/9750/4332/26191/8832/653499/2615/4345/55365/9173/695/3624/2268/7099/384/27202/4068/3575/941/968/2796/51083/23495/6469/1269/55024/335/2294/339390/388585/54900/53342/7704/671/387837/4321/116449/3586/8364/6886/64600/3218/654346/11213/640/2840/1588/3579/722/5196/1378/4057/3623/653/51208/7356/6318/3549/2267/725/259
GO:0045088	GO:0045088	regulation of innate immune response	212	-0.373435	-1.40764	0.00272059	0.0323381	0.0274196	4224	tags=18%, list=18%, signal=15%	2213/3384/50856/10859/54209/406955/4332/26191/118430/7474/127540/58484/7294/2268/7099/114836/4068/3952/56832/79865/387837/4321/116449/338339/3929/2219/11213/140453/4585/2867/285852/1378/4588/11027/6318/56667/4586/4584

## Sheet: Tables S3
Table S3 IC50 values of each drugs for each sample based on the GDSC database.
	A.443654	A.770041	ABT.263	ABT.888	AG.014699	AICAR	AKT.inhibitor.VIII	AMG.706	AP.24534	AS601245	ATRA	AUY922	Axitinib	AZ628	AZD.0530	AZD.2281	AZD6244	AZD6482	AZD7762	AZD8055	BAY.61.3606	Bexarotene	BI.2536	BIBW2992	Bicalutamide	BI.D1870	BIRB.0796	Bleomycin	BMS.509744	BMS.536924	BMS.708163	BMS.754807	Bortezomib	Bosutinib	Bryostatin.1	BX.795	Camptothecin	CCT007093	CCT018159	CEP.701	CGP.082996	CGP.60474	CHIR.99021	CI.1040	Cisplatin	CMK	Cyclopamine	Cytarabine	Dasatinib
TCGA-64-5775	-0.820426	3.06975	3.66134	5.58276	2.91561	7.3533	4.09543	3.99032	0.307594	2.99049	5.24321	-4.62266	2.59423	0.804042	4.33383	3.55691	3.26623	3.49958	-1.09329	0.0719777	1.22413	3.86697	-2.62723	3.84375	4.46086	1.25004	5.84634	-2.24752	3.15408	2.39053	4.86934	0.124786	-6.50833	2.93195	-1.38929	0.709412	-6.65365	5.9873	1.76832	-0.568605	4.36697	-1.69419	3.8897	1.85522	1.05108	3.10141	6.66536	-1.44695	0.56333
TCGA-38-4631	-1.01394	3.36809	3.25226	5.46917	4.26689	9.07401	3.91044	4.30739	2.3845	3.83818	5.41196	-2.89398	3.86452	3.3295	4.49484	5.02712	3.68908	4.49391	-0.493138	0.578411	3.58073	4.93601	-2.02287	2.26514	4.45989	2.29443	5.83728	-0.964825	3.42399	1.99412	4.73965	1.45279	-6.88272	2.87468	-1.2371	2.58371	-5.10218	5.88146	2.88239	-0.0542773	4.49486	-1.46229	5.21933	2.61264	2.56604	3.70799	6.93113	-0.523416	1.30971
TCGA-73-4666	-1.05969	3.81479	2.95571	5.47804	4.72628	7.05425	3.34337	4.45922	1.92634	3.3476	5.32182	-2.8701	3.84217	2.69589	4.68237	5.45836	2.82747	3.85577	-0.209057	0.896791	1.82745	4.44894	-2.03825	1.99984	4.4477	2.10328	5.91927	1.59012	3.50626	2.15336	5.07877	0.52515	-6.34112	2.9365	-1.18634	2.65164	-4.81467	5.97311	2.77684	-0.041602	3.88067	-1.74244	4.7974	2.18291	2.87988	3.46258	6.5245	0.170682	1.87599
TCGA-62-A46O	-0.822779	4.22164	3.61284	5.47613	4.61127	8.84846	3.78446	4.35843	2.25228	4.1682	5.35187	-1.93691	3.02073	6.05204	4.11268	5.48501	5.22978	4.03759	1.35697	0.88648	3.30555	4.94084	-1.97235	1.74939	4.48818	2.48564	5.77897	1.08002	4.13187	3.7048	4.95406	3.57497	-3.47805	2.3166	-1.19237	3.13303	-2.45128	5.63839	2.5323	0.110544	4.532	-1.09097	5.08147	4.11344	3.45854	3.79247	6.87062	1.64174	4.23309
TCGA-55-7913	-0.820356	4.38927	3.40805	5.48244	4.59664	9.13453	3.15877	4.42629	2.43568	3.37831	5.71127	-2.65687	3.73572	3.05302	4.69501	5.4597	3.67002	4.24121	0.672312	1.19079	2.38856	4.9538	-1.70582	2.38389	4.46748	2.74141	5.85022	1.59814	4.12905	3.15114	5.00531	1.3798	-4.31193	3.20348	-1.40159	3.47469	-3.06426	5.60309	2.69357	0.0909876	4.40524	-1.25949	4.82748	2.89767	4.19838	3.94006	6.71016	0.983355	3.69794
TCGA-91-6848	-0.502724	3.78526	2.74688	5.41883	2.54136	7.16301	4.64377	4.03067	1.20589	3.93388	5.01708	-3.81551	2.12773	1.93457	3.7463	3.03818	3.76077	3.39799	-1.80226	-0.00392443	1.62251	4.25684	-2.22589	3.98485	4.51191	1.05603	5.74526	-0.415123	3.38758	2.54835	4.90027	0.208493	-5.99068	2.18668	-1.14411	0.181551	-6.55217	5.77855	3.20171	-0.553402	3.9469	-1.7834	4.70772	2.15979	1.74867	3.42465	6.40259	-1.17256	1.10921
TCGA-50-6591	-0.4543	3.21513	0.889782	5.35425	3.28638	9.4239	4.36759	3.53881	1.39798	3.87682	4.3015	-2.91797	2.08622	4.0164	3.62223	3.32563	5.95708	2.89205	-0.728187	0.220552	2.1543	5.15347	-1.76241	3.14258	4.61279	1.45269	5.62669	0.907488	4.38806	4.35968	5.2479	1.55276	-4.51329	3.4638	-0.955034	1.1729	-5.97349	5.47437	3.21924	-0.33682	4.68698	-1.17531	4.4748	4.2777	1.49743	3.79832	6.80119	-0.0200836	3.05742
TCGA-62-8398	-0.725651	2.9398	2.67197	5.48593	3.8379	8.78888	3.81416	4.27787	2.31303	3.26624	5.65592	-2.60139	3.4427	1.7214	2.88309	5.49343	2.74648	4.49632	-0.143839	0.329658	2.51264	4.58285	-2.02702	2.30509	4.41451	3.01811	5.98433	1.92745	3.41145	1.59077	4.85434	0.697122	-5.96072	3.12601	-1.40044	2.6894	-3.04736	5.77548	2.84672	-0.0123137	4.2715	-1.62644	4.44872	2.0754	3.9058	3.71605	6.60067	0.272498	0.707162
TCGA-49-4506	-0.960774	3.47812	5.02826	5.5735	3.66295	7.96931	3.86514	4.51047	3.32056	3.38051	5.79096	-3.3783	3.26622	0.75799	4.09099	4.65188	2.61029	5.0106	0.594226	-0.598477	1.7962	4.9775	-2.07823	1.83178	4.40415	1.98837	5.88318	0.338228	2.7627	1.29277	4.56114	0.798809	-6.80289	2.96859	-1.61231	3.05789	-4.3764	5.94017	1.78791	-0.193182	3.84442	-1.4452	5.03625	1.86007	3.50275	3.73896	5.92994	-0.479705	1.97218
TCGA-L9-A5IP	-0.955121	3.22092	3.59093	5.49518	4.0533	7.90541	3.26622	4.2915	2.18779	3.53579	5.54012	-3.02469	3.39968	2.11717	3.23802	5.41983	3.15805	4.23209	0.356928	0.200241	2.74164	4.40994	-2.18079	1.87593	4.40921	2.25215	5.86204	2.17346	3.49764	1.81925	4.91013	1.15797	-6.30071	2.14357	-1.67937	2.72224	-2.83122	5.65118	2.17007	0.0212883	3.65047	-1.78366	4.37906	2.63193	3.54323	3.71005	6.26977	0.65016	-0.0380465
TCGA-MP-A4TF	-0.717917	4.24985	2.89004	5.41963	4.19554	8.52104	3.86695	4.19047	2.11012	3.01297	5.28029	-3.25662	3.49569	3.28532	4.40411	5.19587	3.02778	3.71875	0.462707	0.719912	2.05067	4.61176	-1.98338	2.29489	4.45571	2.37413	5.76049	0.971514	4.05423	3.09244	4.97262	0.703875	-4.22547	2.73572	-1.35171	3.16705	-3.4275	5.76496	2.4508	-0.0136127	4.55355	-1.62575	4.8563	2.8148	3.72508	3.80801	7.13196	1.16185	3.27275
TCGA-55-7726	-1.0418	2.45159	2.30576	5.66437	4.01708	7.37657	3.54731	4.19828	1.08885	4.09876	5.51432	-3.83049	3.06882	2.23881	2.10169	5.32485	3.49571	2.69547	-1.12474	0.127257	2.70883	4.37227	-2.35646	1.94518	4.40871	1.81973	6.03886	0.726404	3.33716	1.90012	4.78953	0.858262	-6.16509	1.94348	-1.36546	0.934774	-4.49725	5.6147	2.57712	-0.226963	3.67946	-1.93605	3.45354	2.1536	2.30943	3.23675	6.28397	0.163731	-0.928883
TCGA-73-4676	-0.929342	3.39921	2.99375	5.58367	4.34997	8.36377	2.91376	4.38029	1.9792	3.68149	5.5159	-2.49105	3.99621	3.83988	4.69423	5.17025	3.55536	3.33749	0.92877	0.508996	3.18906	4.65579	-1.6935	1.1375	4.44038	2.32299	6.00292	1.77898	3.62576	2.79036	5.03502	2.41396	-5.42394	2.94496	-1.19419	1.89678	-3.60565	5.97961	2.89872	-0.0471108	3.80171	-1.57048	5.20551	2.76962	3.38991	3.65384	6.45593	0.614465	0.790549
TCGA-78-7166	-0.932605	2.87573	3.83642	5.45768	4.11572	8.66523	3.35677	4.1856	2.3862	2.68223	5.52425	-3.08971	3.23735	2.71756	3.5848	4.99762	3.16747	4.39091	0.395156	0.120054	2.46331	4.84895	-1.93027	1.29394	4.42581	2.43659	5.77206	1.69801	3.38634	1.73347	4.96449	0.621158	-6.10159	2.79983	-1.60515	2.93096	-3.45793	5.75867	2.21131	0.0754097	3.99373	-1.68157	4.53887	2.65802	3.80873	3.71049	6.57756	0.138008	0.967448
TCGA-55-8506	-0.945906	3.29942	2.78462	5.43945	4.95734	8.26362	3.23539	4.00329	1.78199	3.59729	5.41883	-2.53323	4.0568	3.49448	3.85473	5.58558	3.0969	3.27882	0.544893	0.990314	3.02998	4.69105	-1.67102	1.90606	4.442	2.97486	5.77204	2.78019	3.92428	2.49934	5.14724	1.65035	-5.71018	3.46838	-1.20582	3.77553	-2.82489	5.63039	3.08561	0.0881434	3.88433	-1.94635	5.00015	2.97611	4.27139	3.66459	6.77417	1.54428	0.489895
TCGA-50-5936	-0.823926	3.25797	3.05655	5.53424	3.67419	8.33405	3.42197	4.32166	1.92475	2.96289	5.50673	-3.11001	2.94473	3.1599	3.06285	4.83462	3.18072	4.00177	-0.265667	-0.682169	2.29798	4.44267	-1.91551	2.13716	4.41999	2.64707	5.93092	0.842532	3.49198	2.00969	4.85089	0.202206	-5.30233	2.85981	-1.42383	2.09757	-3.45878	5.67374	3.06185	-0.107416	4.44642	-1.50692	4.55083	2.34896	3.49435	3.56286	6.74875	-0.0589499	0.963928
TCGA-55-8620	0.087117	5.41155	1.06754	5.18356	5.07292	8.71441	5.06539	4.11178	2.50088	4.10895	4.97673	-1.59581	3.55077	4.41491	5.30562	5.07692	3.90206	5.47059	0.830089	0.69032	3.79691	5.81235	-1.03751	2.92142	4.61852	1.73841	5.74597	4.57031	4.99026	3.9123	5.00168	1.22908	-3.981	3.19919	-0.721297	2.86067	-3.10804	5.71267	3.90879	0.0255774	5.26402	-0.782691	4.99432	3.39212	3.72173	4.21544	7.41676	2.19714	5.95066
TCGA-55-7994	-0.799954	4.65463	2.69838	5.40278	5.04829	7.80561	3.1182	4.44828	1.83968	2.89543	5.32161	-2.45221	3.58641	3.55222	5.06333	5.50122	2.11749	3.76148	-0.42924	1.5108	2.22543	4.51569	-1.94336	1.89989	4.44586	2.87281	5.87651	0.8048	3.89511	2.81397	5.05532	1.18253	-4.51976	2.46788	-1.03793	2.87586	-3.63934	5.95771	3.31728	0.0307018	4.39316	-1.64001	4.77002	2.1349	3.48025	3.47462	7.00468	0.774428	3.02244
TCGA-73-4670	-0.948843	3.11094	3.46201	5.6121	4.37889	7.50029	3.06012	4.16125	2.59879	3.47036	5.55581	-3.0888	3.62888	2.44477	3.90295	5.44161	3.77364	3.15632	0.265532	0.0994818	2.16581	4.79902	-1.94403	1.54834	4.42193	2.23272	5.86629	1.40077	3.13841	2.00261	4.83158	1.22085	-5.94255	3.39332	-1.39622	2.98055	-3.75156	5.86605	2.29459	-0.0208792	3.62631	-1.65452	4.81819	2.61387	3.58614	3.65494	6.38601	0.305624	2.02782
TCGA-91-6847	-0.8625	3.46054	1.5025	5.38034	4.08906	8.06161	3.79233	4.18455	2.14731	3.42511	4.83909	-2.85634	3.43822	3.74836	4.73325	4.43588	4.24356	3.48873	0.396909	0.914849	2.915	5.1562	-2.21008	1.39165	4.55411	1.78647	5.80606	0.829924	4.57825	4.3185	5.12632	2.30942	-4.24052	2.61567	-1.15987	2.67272	-4.5305	5.77861	2.1673	-0.0191596	4.56989	-1.24365	4.5812	3.43101	2.31104	3.84701	6.64485	1.08426	2.96009
TCGA-MP-A4TA	-0.819149	3.5517	3.03453	5.36863	3.80666	8.20275	3.64805	4.18327	1.8449	3.3584	5.22138	-2.56519	3.59806	2.63406	4.12936	4.94469	2.94297	3.62178	-0.0530952	0.922031	2.68084	4.75162	-1.9835	2.00534	4.45932	2.32274	5.80403	1.0635	3.76459	2.24514	4.93588	1.49704	-6.32274	2.51011	-1.21937	2.82925	-4.13505	5.53898	2.99019	0.0186462	4.09808	-1.71241	5.18765	2.1322	3.51015	3.70621	6.72698	0.294769	1.25261
TCGA-73-A9RS	-0.880899	4.44153	3.0843	5.46117	4.71424	7.86566	3.52478	4.19698	2.45593	3.70132	5.17918	-2.47932	3.48774	3.66403	4.69819	5.4968	4.04192	4.4231	0.597699	0.394156	2.44119	4.68485	-1.58934	2.23939	4.48724	2.37102	5.79073	1.47345	3.78807	3.00244	5.01856	1.74227	-5.39894	3.21905	-1.09995	3.97366	-3.57693	5.63978	2.86036	0.0567543	4.30603	-1.53525	5.13445	3.24018	3.63832	3.9186	7.14181	1.17076	4.15314
TCGA-86-6562	-0.730825	3.18735	2.60199	5.52613	4.65513	8.07905	3.39006	4.278	1.67243	3.53944	5.41379	-2.63184	3.80954	3.45317	3.69639	5.05643	3.37509	3.17667	0.137056	0.351083	2.86974	4.67531	-1.24556	1.76357	4.43975	3.13041	6.05359	2.58364	3.95203	2.71607	5.09832	1.47792	-5.2872	2.78034	-1.27354	1.8087	-3.71484	5.50828	3.11231	-0.0258203	4.17173	-1.57489	4.79633	2.79116	3.0815	3.69024	6.66763	1.30829	0.556793
TCGA-50-5072	-0.798568	3.21654	3.18591	5.46767	3.50284	8.42506	3.79511	4.21752	2.31716	3.78452	5.329	-2.50644	3.20291	3.54123	2.81955	4.97682	3.79237	4.3597	-0.514341	0.0566932	2.87659	4.6214	-1.89688	2.11091	4.45188	2.11495	5.85834	0.553675	3.69302	2.38342	4.79869	1.40252	-5.01238	2.42546	-1.28086	1.75886	-4.30877	5.70465	2.76416	-0.051169	4.2038	-1.37771	4.99419	2.68457	2.70995	3.75832	6.46901	-0.378003	1.35626
TCGA-62-A471	-0.979801	3.05617	2.72925	5.4227	4.1576	8.48667	3.26582	4.16175	2.41337	3.28955	5.27794	-2.64984	3.41603	3.37737	3.05558	5.2267	3.58618	4.05766	0.0895783	0.0916625	2.5611	4.74909	-2.53561	1.5572	4.44617	1.73278	5.59713	1.24964	3.58123	2.199	4.92976	1.30959	-6.09254	2.32831	-1.36717	2.5835	-3.69009	5.93523	2.31875	0.0774038	3.65507	-1.7295	5.09992	2.82104	3.5286	3.55164	6.65306	0.46008	1.27778
TCGA-55-A48Y	-0.938206	2.62316	2.87191	5.54048	3.87218	8.96	2.97281	4.29806	1.58953	2.91784	5.52003	-3.145	3.2129	2.61308	2.89812	5.15584	3.85961	3.06062	-0.289516	-0.137749	1.76408	4.43308	-1.86865	2.17546	4.42599	2.68422	5.99814	0.203881	3.34247	1.98388	4.86925	0.174152	-6.06192	3.13618	-1.27009	1.66158	-3.41762	5.59429	3.08846	-0.0903737	3.74967	-1.6448	4.5675	2.95316	3.5611	3.66532	6.165	0.501771	0.0459869
TCGA-50-5930	-0.80953	3.16463	3.63827	5.51819	4.47037	8.83336	3.12229	4.21259	1.42659	2.93681	5.45531	-2.78331	3.15135	3.57397	3.22876	5.06118	3.74668	3.3696	-0.683074	0.0857248	2.31802	4.3175	-1.77384	2.42615	4.40794	2.72291	5.85723	1.30687	3.44522	1.87078	4.97178	0.272826	-5.67221	2.72344	-1.38836	1.52367	-3.49695	5.58856	3.28371	-0.0684359	3.99421	-2.01314	4.60056	2.89192	3.41531	3.60825	6.60935	0.321766	0.621327
TCGA-78-7148	-0.787788	2.93747	2.87583	5.5405	4.37812	8.63621	3.08857	4.36157	2.16004	3.17785	5.6406	-2.64639	3.5757	3.41473	3.17071	5.53597	3.31926	3.79189	0.0598252	0.089634	2.61414	4.51408	-1.51778	1.98407	4.4142	3.11774	5.96561	2.12625	3.5697	2.10697	4.7919	1.00633	-5.05921	3.26285	-1.28728	2.64983	-3.15346	5.63209	2.99594	0.0609028	4.49243	-1.43372	4.65106	2.58321	3.97431	3.8273	6.78344	0.762332	1.31019
TCGA-86-8359	-0.784393	3.79899	3.27634	5.46685	4.15911	8.29288	2.98303	4.33905	1.8358	3.2332	5.50906	-2.89495	3.68753	2.30165	3.93352	4.85301	2.66985	3.24	0.23493	0.225046	2.21511	4.64816	-1.6429	2.23987	4.41581	2.51939	5.85867	1.6296	3.8781	2.49789	4.92259	0.850829	-5.67763	2.759	-1.34335	2.19712	-3.7973	5.597	3.13342	-0.0191483	4.1909	-1.73173	4.91318	2.52014	3.8542	3.84105	6.88235	0.58493	1.29649
TCGA-97-A4M3	-0.677427	3.29949	3.28306	5.47872	4.00961	8.91449	3.63577	4.26647	1.29238	2.251	5.49919	-3.09803	3.24725	2.85997	3.53898	5.3678	3.71632	3.91877	0.115667	0.171598	2.54108	4.42337	-1.55708	2.38981	4.42423	2.64113	5.77838	1.11516	3.83716	2.61027	5.01494	0.587986	-5.32208	3.0307	-1.42796	2.60644	-3.08377	5.50491	2.62098	-0.0496485	4.23768	-1.50377	3.82758	3.08245	3.73514	3.80921	6.54955	0.421013	1.16543
TCGA-49-4507	-1.35642	2.17575	4.05964	5.48712	3.65439	8.0198	2.78642	4.28525	1.66568	2.93904	5.62293	-3.7077	3.59092	1.90925	2.96141	4.94368	3.01848	3.76996	-0.00400298	-0.275299	2.3539	4.43859	-2.5548	2.01272	4.41334	1.70003	5.83682	0.896657	2.89921	0.966509	4.88672	-0.0801461	-7.58951	2.95951	-1.64712	2.478	-4.03695	5.66664	2.24144	-0.0750278	3.47421	-2.22068	5.10615	2.47074	3.38787	3.29837	6.1755	-0.0743387	-0.638227
TCGA-64-5781	-1.2224	2.34601	3.75276	5.53592	4.192	8.07011	3.32668	4.29867	1.90934	3.16696	5.64083	-3.49708	3.72234	1.49832	3.23281	4.83416	3.35419	3.47978	0.0510373	-0.429831	2.52194	4.45672	-2.35458	2.05077	4.39809	1.93958	5.93559	1.22301	3.00628	1.26603	5.0341	0.694784	-7.46321	3.10587	-1.59781	1.89301	-3.91051	5.70162	2.49342	-0.118803	3.22215	-2.21701	5.08592	2.45431	3.46127	3.55631	6.18101	0.544922	-1.33286
TCGA-05-4418	-0.855264	3.307	3.94828	5.45199	3.86926	8.65809	4.01992	4.27656	2.16442	3.1962	5.53704	-3.17961	3.20023	2.90953	4.1419	4.6602	2.16483	4.32047	-0.202024	-0.170113	2.37486	4.66805	-2.03635	2.02098	4.40621	2.21906	5.88151	-0.173382	3.19386	1.57428	4.6516	0.648173	-6.23113	2.14227	-1.5254	2.47858	-4.49806	5.77954	2.44876	-0.128358	4.21431	-1.67417	5.01613	1.85595	3.18098	3.68026	6.78037	-0.49065	1.07329
TCGA-55-6984	-0.846767	3.68503	2.96827	5.49353	4.38783	8.7371	3.40917	4.5296	2.57463	3.34294	5.83397	-3.03766	3.95384	0.864973	3.86766	5.29262	1.60061	4.31444	-0.307077	0.518942	2.85074	4.60292	-2.38963	1.47649	4.37345	2.7257	6.0309	1.24674	3.49968	1.70305	4.88037	0.370079	-5.91418	3.30681	-1.37848	2.8324	-3.11012	5.92203	3.36917	0.14199	4.17904	-1.69392	4.02165	1.52466	4.0244	3.85875	6.63796	0.574938	1.11728
TCGA-NJ-A4YP	-0.620209	3.27819	3.41066	5.47461	3.4003	8.38721	3.61687	4.23831	1.75874	2.58677	5.38214	-3.17835	3.16507	1.66864	3.21767	4.65497	2.86738	3.78076	-0.281428	0.117897	1.57566	4.45973	-1.80127	2.06204	4.42281	2.20675	5.9018	0.881675	3.42196	1.99534	4.94785	0.0596857	-6.09532	2.87258	-1.31334	1.82675	-4.15812	5.59413	2.60079	-0.123279	4.00209	-1.59749	4.23775	2.3372	3.32797	3.78831	5.87324	0.0110237	0.237362
TCGA-44-7667	-0.705483	4.53341	2.2298	5.33928	4.01498	8.23375	5.06588	4.03764	2.45022	4.41604	4.80856	-1.97733	2.92199	4.09476	5.10492	5.00326	4.62993	5.92579	-0.162095	0.616135	2.80145	5.26719	-1.97376	2.9702	4.61034	1.42736	5.75176	2.28036	4.34266	4.11007	5.03095	2.7565	-3.76932	3.14038	-0.813039	2.38359	-4.90649	5.94691	2.50592	-0.141775	4.42841	-0.713431	5.20181	4.0013	2.63468	3.77609	7.02339	0.172306	5.0453
TCGA-49-4514	-1.07399	2.18875	3.0485	5.44715	4.35089	8.22798	3.38394	4.14546	1.94564	3.20772	5.62095	-2.48345	3.63197	2.85388	3.05369	5.44034	3.83707	3.9161	-0.367274	-0.209058	3.13952	4.80889	-2.19362	2.26086	4.44182	2.40922	5.82637	2.08307	3.25717	1.26981	4.90915	1.46651	-7.224	3.01242	-1.20839	2.71082	-3.64263	5.79076	3.14283	0.0386984	3.82596	-1.77396	5.1991	2.73809	3.4886	3.50803	6.55632	0.133546	-0.0660078
TCGA-49-4487	-0.980485	3.6084	3.10887	5.45407	3.9136	7.98308	3.79153	4.3217	1.83565	3.28842	5.21069	-2.98349	3.13637	3.61765	3.48205	4.68971	4.12544	3.84622	-0.787357	0.0478676	2.22679	4.72923	-2.03416	2.70031	4.4887	1.67262	5.87775	1.19291	3.75854	2.50877	4.99327	0.315559	-5.95024	2.84184	-1.21279	1.28654	-4.20061	5.63142	2.85684	-0.168821	3.8754	-1.95404	4.99128	2.97881	2.89221	3.51848	6.45674	0.235054	0.838532
TCGA-53-7624	-1.10979	3.3189	3.20372	5.41975	4.15649	7.32961	4.94977	4.40298	2.27089	4.52597	5.11512	-2.48704	2.91519	5.51781	3.2412	4.65645	4.70208	4.60742	0.504706	0.284385	3.62789	4.82591	-2.372	2.07916	4.49222	1.93054	5.82688	-0.765065	3.64954	2.60196	5.02544	2.85499	-4.53651	1.57674	-1.12429	2.21075	-3.84249	5.51309	3.23429	0.00777654	3.60723	-1.8678	5.04649	3.62503	2.63113	3.32962	6.82107	0.88845	1.80286
TCGA-55-8092	-0.626221	3.81594	3.11918	5.41278	4.08241	8.0233	3.03964	4.33923	1.89634	3.37981	5.13416	-2.63781	3.05034	2.7177	3.64776	5.09233	3.07211	3.07571	-0.513693	0.481616	2.33455	4.69458	-1.81611	2.33549	4.45063	2.95954	5.8966	1.9408	3.53511	1.89537	5.00996	0.676888	-6.20482	2.67027	-1.16481	2.19152	-4.31837	5.452	3.28602	-0.0671344	4.08102	-1.76028	4.60659	2.50818	3.41335	3.63142	6.59283	0.655452	1.43221
TCGA-97-8176	-0.862438	3.10139	2.97943	5.47681	3.93089	8.66374	3.27832	4.35271	2.12099	3.03682	5.56989	-2.48128	3.40462	2.63627	3.53305	5.24901	3.18483	3.99559	-0.0811443	0.034341	2.56638	4.66962	-1.96803	1.9353	4.43982	2.39061	5.9013	1.79419	3.57994	2.04896	4.95115	0.949144	-6.16529	2.83729	-1.31852	2.2111	-3.43994	5.70501	2.87683	-0.0156521	3.99734	-1.70571	4.52884	2.31286	3.85812	3.55196	6.20198	0.224189	0.862267
TCGA-49-AARN	-0.617778	3.78306	2.74116	5.3811	4.02272	8.29686	3.7785	4.16974	1.83294	2.91827	5.4778	-2.81345	3.72519	2.33843	4.05561	4.71498	1.86814	3.63479	-0.108564	0.805588	2.62069	5.00382	-1.7806	2.10242	4.44443	2.73461	5.87026	1.94942	3.82191	2.20189	4.99967	0.336623	-5.81063	3.10073	-1.34259	2.59831	-3.97262	5.54573	3.16983	0.0111524	4.55847	-1.61398	4.41816	1.96546	3.68398	3.68452	6.76896	0.950167	0.913677
TCGA-95-7562	-0.998941	3.73981	3.04378	5.44067	4.51122	8.20155	2.82712	4.32245	2.25568	3.49731	5.03464	-2.71669	3.73858	4.53015	5.12667	4.85266	4.64192	2.89935	0.68491	0.88732	2.47711	5.01881	-1.53397	2.09013	4.49303	1.9639	5.99309	2.22516	4.33133	3.54312	5.09505	2.39607	-4.554	3.56977	-1.1093	2.36381	-4.63919	5.6801	2.91311	0.0502896	4.11019	-1.643	5.29346	3.70728	2.34915	4.04259	6.71145	1.18276	2.62895
TCGA-05-5425	-0.856235	3.19209	3.31606	5.51986	4.55351	8.5959	3.31121	4.33415	2.16237	3.18849	5.50358	-2.66966	3.54131	2.91439	3.88833	5.55885	3.67191	3.66165	-0.0386386	0.129907	2.96569	4.7339	-1.81088	2.70686	4.42341	2.36608	5.95193	1.50848	3.35909	1.70253	4.86643	0.74037	-6.56393	3.56058	-1.26191	2.39807	-3.44188	5.71875	3.47047	-0.0591785	4.20193	-1.74022	5.14915	2.68693	3.5034	3.6133	6.47063	0.679878	0.733921
TCGA-95-7043	-0.746905	3.84153	1.69421	5.51314	5.23689	8.70061	3.39891	4.20081	1.92052	3.98089	5.15688	-1.53829	3.26241	4.40016	3.5188	5.88903	5.39717	3.70712	0.815379	-0.0409195	3.75149	4.62857	-1.56089	1.75548	4.49581	2.87736	5.83883	3.63586	4.10134	3.09116	5.15216	2.4075	-5.29574	3.67515	-0.977892	3.60536	-3.565	5.58278	3.57786	0.112021	4.37625	-0.99991	4.89619	4.34796	3.23495	3.76713	6.68982	1.86192	2.65864
TCGA-05-4398	-0.654462	4.13946	2.90502	5.44305	4.43418	7.94796	3.44379	4.35346	1.82107	3.52435	5.50349	-2.98665	3.64945	3.06297	4.87026	5.01099	2.6004	3.08039	-0.119561	0.997757	2.71515	4.73648	-1.60834	2.08544	4.44824	2.15334	5.95824	1.42223	4.05128	2.76159	4.93502	1.37567	-5.76155	2.66281	-1.3652	2.09967	-3.89147	5.81887	3.04021	-0.106898	4.17153	-1.68684	4.65446	2.46509	3.289	3.43077	6.76607	0.838255	2.04883
TCGA-73-4675	-0.616627	3.41405	3.11718	5.47883	4.26254	9.22575	3.58052	3.98064	1.7865	3.10756	5.72794	-2.52335	3.49449	3.09075	3.61138	5.1701	2.91182	3.71359	0.371379	0.0518961	3.23306	4.69307	-1.49919	1.74537	4.40565	3.28532	5.82011	3.1782	3.74475	2.13041	5.04658	1.5798	-5.3796	2.92461	-1.45312	2.96717	-2.74103	5.50611	2.77481	-0.0398255	4.27665	-1.52475	4.41561	2.68747	4.39469	3.77233	6.52701	0.89733	1.00178
TCGA-44-2666	-0.191615	3.90718	2.75409	5.45821	3.51446	8.75174	3.01422	4.34512	1.76256	2.99351	5.3156	-2.68854	3.53609	4.35757	3.83175	5.04139	2.60577	3.27456	0.578642	1.15685	2.15836	4.90839	-1.28707	1.92195	4.45009	3.29872	5.95262	0.450069	4.03077	3.19286	4.64864	1.50592	-4.12255	2.92233	-1.02777	2.3492	-3.64559	5.45523	3.29326	-0.0104172	4.74108	-0.899625	4.57061	2.26503	3.23215	3.84641	6.55723	1.21014	2.04334
TCGA-86-8585	-0.907593	3.83476	2.98318	5.40646	4.20319	7.91075	3.3405	3.98288	1.99522	3.18558	4.93159	-2.98481	3.15094	3.66587	3.82938	5.04949	2.9967	3.70461	-0.2541	0.504865	2.63895	4.73821	-2.07976	1.60466	4.47071	2.46951	5.65234	1.53177	3.58438	2.16943	4.98674	1.00567	-5.82293	2.53654	-1.39056	2.81152	-3.70756	5.59851	2.36282	-0.023497	3.99715	-1.87169	5.25242	2.77616	3.47539	3.475	6.74499	0.663232	1.81323
TCGA-91-6829	-0.697333	2.75312	2.41788	5.49779	3.76722	8.40303	3.46051	4.22368	1.21903	2.78499	5.41278	-2.65474	3.20236	4.2338	2.66531	4.77991	4.67212	2.72847	-0.256933	0.305516	2.54339	4.41356	-1.73066	2.78958	4.47257	2.57184	6.03723	1.3305	3.9313	2.8787	5.09288	1.16368	-5.21791	3.3085	-1.10123	1.19924	-3.81363	5.46766	4.18164	-0.146736	4.13391	-1.76569	4.37259	3.6472	2.94259	3.5941	6.55696	0.640105	-0.480375
TCGA-78-7146	-1.2025	3.4691	2.77672	5.50217	4.49257	7.07794	2.90498	4.32364	1.30515	2.4345	5.45778	-3.38142	3.58055	3.42408	3.80003	5.23489	3.36698	3.40169	-0.246184	0.796553	1.79099	4.34083	-2.29748	1.69712	4.43481	2.17472	5.79799	-0.664064	3.67799	2.76315	5.01089	0.49271	-5.16159	2.43754	-1.11046	2.21891	-3.62999	5.9554	3.20966	-0.0137561	3.81043	-1.68711	4.3916	2.49053	3.0499	3.25206	6.79995	0.515747	1.29524
TCGA-49-4494	-1.01178	3.13396	3.76016	5.57146	4.75168	9.11717	3.42254	4.41284	2.54467	3.30736	5.89196	-3.18848	4.43916	2.80023	5.05697	5.08944	2.39663	3.47031	0.58241	0.40691	2.92276	4.5751	-1.52673	1.77477	4.41799	2.26787	6.22599	1.69446	3.59002	2.05211	4.98197	1.77702	-6.81138	3.45544	-1.45053	2.71867	-4.29467	5.75101	2.79408	0.00266335	4.39443	-1.74205	5.13226	2.09298	3.23465	3.71118	6.53991	0.668831	1.20541
TCGA-55-8089	-0.848868	3.32262	2.78902	5.44347	4.1218	7.23024	3.68649	4.38458	1.71654	3.74711	5.32422	-3.42605	3.29216	2.5691	3.0858	4.89403	2.29555	3.59631	-0.740435	0.139648	2.3618	4.47482	-2.22573	2.41001	4.42183	2.31262	5.94024	0.715668	3.24238	1.5085	4.84358	0.459532	-5.46089	2.25039	-1.38239	1.59448	-4.39887	5.73192	2.975	-0.149536	3.85282	-2.08561	4.94361	1.74465	2.91915	3.40684	6.85452	0.00329569	0.302095
TCGA-55-6975	-0.940593	2.27159	2.81615	5.56832	3.27366	7.73848	3.76282	4.07971	1.54859	3.64583	5.51412	-3.20834	3.16732	3.00865	2.23369	4.90636	3.62507	3.23411	-0.511483	-0.130659	2.88806	4.21045	-1.96444	2.59826	4.43679	2.357	6.03258	1.37323	3.20113	1.85454	4.83903	0.94354	-5.51308	2.73618	-1.43176	1.3234	-4.2239	5.59368	2.49782	-0.178372	3.65359	-1.8947	4.62907	2.5274	2.59032	3.4994	6.4398	0.101671	-0.369448
TCGA-91-8499	-0.66388	4.37313	1.22155	5.35742	3.44708	8.00817	4.25546	4.01556	1.95031	4.24695	4.5368	-2.48507	3.35532	4.21518	5.09909	4.3405	4.56205	4.46207	0.0503578	0.50848	2.10853	5.80576	-1.85987	2.46004	4.61699	1.51635	5.79897	0.641729	4.17303	4.23096	4.87454	1.76083	-5.00114	3.32839	-0.568276	2.26357	-6.13921	5.58358	3.23433	-0.137066	4.08894	-1.1687	5.90132	3.98124	2.30639	4.05933	6.58188	0.618639	4.26793
TCGA-05-4250	-0.878392	3.19678	2.76698	5.52462	3.99325	8.05116	3.92393	4.43496	1.53426	3.29338	5.64766	-3.18307	3.80436	2.84301	4.02322	4.9876	2.53012	3.70406	-0.0534184	0.280882	2.178	4.61604	-2.09433	1.67725	4.42981	2.0424	5.89712	0.539591	3.55638	2.26118	4.83078	0.694971	-5.89273	2.61303	-1.30075	2.10733	-4.52104	5.90696	2.92996	-0.117158	4.19177	-1.58138	4.4798	2.08899	3.24239	3.37307	6.80685	-0.103894	0.630567
TCGA-55-A493	-0.659987	4.17863	2.54297	5.38771	4.34728	7.66413	3.86447	4.26115	1.14458	3.61709	5.48424	-2.95224	3.6564	3.18035	4.26651	5.08711	2.5425	3.21564	-0.398514	1.17647	2.4799	4.73821	-1.8108	2.54798	4.45873	2.07607	5.82095	1.64272	4.05695	2.58583	4.92716	0.645502	-5.09936	2.56358	-1.21997	2.13543	-3.66724	5.79147	3.54991	-0.101486	4.42954	-1.79193	4.42482	2.29646	3.78485	3.45195	7.23036	0.677614	1.82974
TCGA-78-7143	-0.685123	4.30153	2.24583	5.37025	4.24242	8.24853	3.17319	4.39898	2.01018	3.31756	5.0133	-2.35238	3.82233	4.59582	5.00681	4.66467	3.34748	3.38883	0.406142	1.13241	2.89362	5.14483	-1.46454	1.1596	4.47413	2.74647	5.8514	1.40168	4.44938	3.57909	5.10762	1.7555	-4.36955	2.66249	-1.04482	2.26049	-4.22344	5.52384	3.38423	0.0759837	4.61397	-1.35423	4.88539	2.67841	3.34364	3.90845	6.88021	1.04834	3.05272
TCGA-55-6987	-0.657846	4.32015	3.51205	5.43437	4.09622	7.72956	3.31078	4.45454	2.02418	3.81088	5.26404	-2.99452	2.99706	2.78899	4.51801	4.69138	2.80351	3.23526	-0.599238	0.18074	2.07211	4.75562	-1.68663	3.09628	4.4604	1.97184	5.938	1.24164	3.63995	2.39506	4.87845	0.241424	-5.6899	2.76483	-1.29989	1.1716	-5.01876	5.70997	3.01028	-0.226194	4.0561	-1.78314	5.19679	2.27748	3.0336	3.69901	6.70145	0.148138	1.78473
TCGA-49-6742	-0.798592	2.52932	3.04173	5.44548	3.85134	8.97923	3.88535	4.34965	2.55757	3.48793	5.30553	-2.36067	3.44371	3.66977	2.74617	5.00311	3.34809	4.81124	0.24134	0.0677041	3.38074	4.74717	-2.07133	1.45702	4.43682	2.53546	5.81515	1.55894	3.65778	2.16531	4.86365	2.22526	-5.46841	2.39406	-1.32723	2.38544	-4.09726	5.67872	2.83866	0.0666503	4.13264	-1.37168	4.85623	2.28629	3.12576	3.74777	6.57117	0.193158	0.384092
TCGA-69-8253	-0.717304	3.6578	3.82279	5.50172	4.60611	8.61188	3.68128	4.25377	2.13668	2.32732	5.51534	-3.16678	3.61021	2.41106	3.70238	4.89089	2.92288	4.47772	0.607481	-0.0164797	2.09664	4.62859	-1.74414	1.81596	4.40254	2.46167	5.74802	1.24948	3.61383	2.13859	4.91356	0.888342	-5.70997	3.0214	-1.49706	3.06507	-2.65114	5.68449	2.59549	-0.00596638	4.28509	-1.48339	4.08016	2.60403	3.95434	3.84812	6.43863	0.730017	1.42781
TCGA-49-6743	-0.971384	3.36175	2.59751	5.5011	4.50817	7.57431	2.99989	4.24471	1.68011	3.87543	5.20529	-2.25603	3.14545	4.59617	2.84719	5.37921	4.56603	3.30875	-0.357606	0.296987	3.06287	4.56386	-2.04703	2.36154	4.45685	2.57616	5.82553	2.45203	3.82101	2.67261	5.05768	1.67839	-5.69851	2.9184	-1.171	1.80213	-3.52426	5.63139	2.9285	-0.0332902	3.82115	-1.91491	4.90096	3.25179	3.24228	3.5336	6.59102	0.752237	0.380836
TCGA-78-7150	-0.894691	2.75653	2.93685	5.4985	4.13967	8.67071	3.67548	4.18661	1.93011	3.91395	5.41479	-2.36655	2.86339	4.07982	2.47048	5.05111	4.33823	4.19421	-0.749539	-0.0233754	3.39352	4.3723	-2.03772	1.86397	4.44372	2.78251	5.92937	0.596508	3.67694	2.34004	4.93329	2.23641	-5.73451	2.20769	-1.21746	1.83384	-3.99128	5.66176	3.27278	-0.00644931	4.05596	-1.48301	4.29519	2.96172	2.60685	3.65759	6.52461	0.0676418	-0.161037
TCGA-44-2668	-0.828023	3.28315	3.22816	5.50213	3.81826	7.17424	2.86431	4.45749	1.54643	3.74678	5.53353	-3.58196	3.51858	2.8582	3.16826	4.97356	2.79139	2.79321	-0.818116	0.58587	1.97904	4.56366	-2.01916	2.35982	4.42373	1.92343	5.97081	-0.20596	3.8245	2.61207	4.71902	0.652091	-5.32202	2.75225	-1.25457	1.36378	-4.35157	5.84059	3.19207	-0.154643	3.96302	-1.87435	4.72916	2.18207	2.67775	3.4177	6.65309	0.164988	0.22169
TCGA-49-AARE	-0.912278	3.70086	3.11503	5.42557	4.54108	8.64401	3.65765	4.13111	2.08242	3.34251	5.37536	-2.43361	3.40593	3.34558	3.54793	4.87429	3.71212	3.73991	0.4351	0.512705	3.09063	4.84996	-2.07911	1.78154	4.46744	2.38202	5.82643	2.53894	3.90302	2.28947	5.13274	1.37097	-6.4589	2.9231	-1.37364	2.42723	-3.40594	5.54674	2.98198	0.0403164	3.97329	-1.73956	5.02663	3.08384	3.95397	3.53597	6.64841	1.04086	1.49616
TCGA-MP-A4T8	-0.774115	3.02207	3.25999	5.46147	3.92	7.88831	3.14183	4.17218	1.64852	2.73478	5.34243	-3.33071	3.50255	2.5922	3.3716	4.79572	2.93283	3.00369	0.104007	0.105081	2.0661	4.74806	-1.90035	2.0324	4.45036	2.20234	5.79498	2.01354	3.64015	2.56726	4.96589	0.886192	-5.04233	2.97564	-1.41213	1.96964	-3.47523	5.76538	2.45017	-0.0639304	3.80622	-1.59366	4.72078	2.90615	4.00253	3.62286	6.59167	0.636517	1.52778
TCGA-93-8067	-1.08823	3.02231	2.93786	5.51206	4.31688	8.67936	2.58664	4.34681	1.40021	2.64885	5.50224	-2.88529	3.88116	2.10481	3.28699	5.63892	3.55833	3.85478	-0.0659036	0.217798	2.48018	4.58117	-2.22002	2.21792	4.41525	2.39938	5.84578	1.26522	3.84699	2.42767	4.9235	0.485923	-5.56911	3.24639	-1.34419	3.03101	-2.81487	5.77227	2.89508	0.0802204	4.06535	-1.61897	4.29322	2.89619	3.80766	3.68378	6.89258	0.782849	0.277145
TCGA-05-5429	-0.88215	2.84902	3.30335	5.56843	4.13362	9.4553	4.00267	4.49551	2.72204	3.64121	5.83044	-3.264	4.20825	0.687908	4.28374	5.04898	1.9305	5.01588	0.710399	0.525364	3.36866	5.22781	-2.24682	1.15317	4.37229	2.63617	6.21037	0.435968	3.30605	1.29414	4.80593	1.01112	-7.14774	3.76607	-1.26624	3.47241	-4.15709	5.99348	4.05457	0.158459	4.60661	-1.30447	4.72724	1.72333	3.24263	3.91824	6.29324	0.452818	0.383031
TCGA-05-4415	-0.761695	3.68586	3.73082	5.44619	3.13871	8.74316	4.43432	4.23018	1.67267	3.60973	4.92408	-3.48852	1.96804	2.72359	4.12742	4.3155	3.59796	5.1837	-0.489106	-0.183526	1.33498	4.2951	-2.18547	2.31019	4.49504	1.62809	5.64977	-2.62872	3.42103	2.65444	4.83876	0.810043	-5.22331	1.57635	-1.36517	1.54908	-5.47906	5.88106	1.55346	-0.328485	4.61735	-1.333	5.05831	2.25977	1.81856	3.50105	6.77652	-1.76737	2.0969
TCGA-86-7711	-1.09285	3.53922	3.51398	5.53635	4.8425	7.455	2.96713	4.46571	2.02233	4.58091	5.58145	-2.03921	3.15645	4.59993	3.42593	5.03253	5.0068	2.7815	-0.35227	0.163066	3.43279	4.62893	-1.94801	2.68438	4.44185	2.34146	5.85329	2.00138	3.7606	2.78749	5.02835	1.86248	-5.11483	3.11	-1.23617	1.65489	-3.24108	5.74301	3.59753	-0.12471	3.6565	-1.89152	5.05149	3.52641	3.0164	3.48686	6.73541	0.683494	0.400813
TCGA-NJ-A55O	-0.408012	3.93596	3.2012	5.47643	4.42646	9.28463	3.5131	4.39779	2.35104	2.94648	5.74039	-2.60951	3.6912	1.93376	4.19239	5.31821	2.45605	4.19982	0.60038	0.684497	3.2058	4.69747	-1.55279	2.29077	4.40921	3.10312	5.95446	2.54639	3.70578	2.09174	4.93785	0.94945	-5.37768	3.69536	-1.41875	2.88478	-2.49253	5.63466	3.30677	0.0180114	4.59851	-1.47613	4.52351	2.03812	4.75931	3.80168	6.84254	1.25501	2.19958
TCGA-55-8505	-0.571022	3.04144	2.67412	5.48164	4.01198	8.69647	3.71653	4.21127	1.96843	3.71482	5.69883	-2.49489	3.32521	3.23413	3.24806	5.28622	3.17524	3.58497	0.0775574	0.393828	3.15094	4.50467	-1.85181	2.01564	4.41428	2.76635	5.96569	1.71967	3.73271	2.04832	4.9061	1.38204	-5.28896	2.45722	-1.37879	2.33857	-2.9979	5.68102	3.04827	0.0352433	3.9892	-1.77384	4.40301	2.39714	3.64757	3.80641	6.47381	0.551607	0.367277
TCGA-44-8120	-0.453161	3.10604	2.48762	5.48755	4.08239	8.89931	3.10991	4.12145	1.00285	2.40794	5.57915	-2.57778	3.34497	3.09166	3.49669	4.82796	3.07219	2.70858	-0.0461482	0.235974	2.48691	4.40251	-1.23755	2.29652	4.43655	3.03929	6.04085	1.93376	3.70015	2.54562	5.01279	1.29248	-5.01975	2.89074	-1.27107	1.98132	-2.82673	5.46908	3.61824	-0.144243	4.10673	-1.61208	4.30558	2.76399	4.17903	3.57764	6.97236	0.812721	0.237277
TCGA-97-A4M5	-0.377724	3.66584	2.91412	5.43225	3.73144	8.5143	3.65594	4.12158	1.61811	2.72354	5.37875	-2.81017	3.15867	2.18981	2.94253	4.85288	2.63898	3.77027	-0.329279	0.0624319	2.44613	4.55399	-1.61424	2.47994	4.42897	2.85958	5.86853	1.93061	3.52025	1.92631	4.88652	0.0958697	-5.68507	3.0896	-1.31732	1.98269	-3.19919	5.39673	3.15792	-0.11152	4.51389	-1.44567	4.36632	2.41463	3.99685	3.69996	6.66297	0.811394	1.15075
TCGA-69-7979	-0.682686	4.01921	2.14017	5.42314	5.23526	8.48414	3.66763	3.8973	1.8161	2.85206	5.13249	-2.32709	3.80902	3.88677	4.21896	5.36928	4.22435	3.38715	0.749655	0.852068	3.15894	4.89456	-1.50694	1.73975	4.49192	2.52174	5.84165	2.32902	4.49524	3.64951	5.27352	2.14935	-4.4291	3.2985	-1.07853	3.36737	-2.62988	5.69113	3.44154	0.108461	4.22842	-1.62481	4.70905	3.91583	4.05625	3.86356	6.73536	2.30034	2.52542
TCGA-05-4396	-0.612531	3.6011	2.5402	5.49913	4.44262	9.26382	3.0102	4.34905	2.17182	2.99998	5.65587	-2.35301	3.6619	3.77453	4.19192	5.53423	3.56869	2.97398	0.251705	0.428727	2.16414	4.72775	-1.20673	1.80325	4.41209	3.30408	5.96313	1.06385	3.77859	2.57672	4.90018	0.995411	-4.31845	3.25003	-1.05334	3.41233	-2.9951	5.43343	3.74156	0.108033	4.34593	-1.43572	4.38464	3.10633	4.19939	3.9234	6.93259	1.09576	2.82177
TCGA-55-A48Z	-0.514116	3.89233	3.00743	5.3693	4.29286	8.45935	3.2452	4.20951	1.92437	3.16635	5.29686	-2.78495	3.40763	4.18228	4.27611	4.73103	3.5983	2.76555	0.120924	0.845415	2.98148	5.20196	-1.39299	2.19851	4.48161	2.59459	5.89795	2.53986	4.22204	2.91019	5.14907	0.803514	-5.22413	3.20278	-1.31591	1.94884	-3.81741	5.43446	3.60369	-0.0125202	4.61855	-1.70096	4.81704	3.00089	3.62866	3.64546	6.6051	1.26581	1.99824
TCGA-78-7542	-1.23257	2.96359	3.39371	5.49107	4.65208	7.04283	3.44873	4.44084	2.03942	3.39806	5.56984	-3.82812	4.22417	3.13301	3.83089	5.4307	2.25753	3.5532	0.618629	0.710535	2.80864	4.40353	-2.63073	1.4846	4.41016	1.86789	5.94254	0.628347	3.54354	1.91837	4.95872	1.56269	-6.29933	2.29839	-1.34933	3.21604	-2.58541	6.09665	2.4265	0.0719816	3.76964	-2.2346	4.59006	2.56154	3.33111	3.24578	6.66286	1.18165	0.833078
TCGA-86-8673	-0.834665	3.96131	3.26228	5.45297	4.34078	9.0807	3.08984	4.23053	1.80966	2.76845	5.71049	-2.69071	3.84776	2.7249	4.60069	5.05009	3.3648	3.10107	-0.535888	0.711908	2.5669	4.63083	-1.74864	2.00806	4.46026	2.20554	5.93411	1.88844	4.03145	2.78329	5.21835	1.39662	-5.8174	3.05587	-1.34432	2.36056	-3.24581	5.67841	2.51137	-0.062573	3.77911	-1.9509	4.83925	3.00692	4.0229	3.59137	6.58769	1.1585	2.00213
TCGA-95-7039	-0.828496	2.82042	2.76462	5.47208	4.66495	8.27468	3.06628	4.25211	1.76126	2.48209	5.47643	-2.83209	3.85071	3.18264	3.36132	5.23748	2.59686	3.20364	-0.851777	0.0538735	2.65273	4.61549	-1.66961	1.98456	4.43269	2.66313	5.91886	0.840572	3.67052	2.30925	5.11251	1.31687	-5.91932	2.88873	-1.2772	2.0157	-3.82648	5.75688	3.33195	0.0202668	4.06336	-1.68457	4.32538	2.33718	3.37061	3.4896	6.72496	0.415596	0.12805
TCGA-78-7160	-0.5891	3.53185	2.97194	5.55567	3.88679	8.00692	3.00078	4.55236	1.95895	3.25874	5.47287	-2.78008	3.36809	2.73423	3.16499	5.14203	3.28987	3.48476	-0.0139099	-0.0399797	2.52849	4.44694	-1.45477	2.49542	4.42123	2.86122	6.05618	1.88495	3.56498	2.27707	4.77666	0.451283	-5.08999	3.22185	-1.32964	1.61282	-3.18209	5.55311	3.08555	-0.0925234	4.1164	-1.37207	4.63576	2.51638	3.55891	3.81479	6.49119	0.838271	0.73693
TCGA-44-6779	-1.24992	2.05554	3.54601	5.5241	4.26238	7.11256	2.5596	4.48357	1.44892	3.31196	5.53725	-3.49724	3.46308	2.43451	2.19465	5.33954	2.45145	2.45631	-0.289205	0.433672	1.97002	4.02138	-2.38977	1.86403	4.36665	2.65709	6.07903	2.35801	3.11896	1.04191	4.91534	0.00682559	-6.51542	2.57432	-1.52174	2.05492	-3.57424	5.6939	2.63546	-0.0296992	3.29993	-2.45352	4.62981	2.15707	2.89176	3.28877	6.62076	0.453032	-1.90672
TCGA-95-A4VK	-0.560536	3.5874	3.01687	5.4021	3.88859	8.87203	3.39847	4.36833	1.70619	3.13682	5.27692	-2.83865	3.371	3.46968	3.61854	5.11083	2.93135	3.76848	0.288699	0.664963	2.25137	4.82157	-1.60071	1.53223	4.44928	3.10084	5.79704	1.25367	3.84155	2.32805	4.91697	0.277608	-5.0102	2.86198	-1.38239	3.11426	-3.40654	5.40818	2.95004	0.0191082	4.5258	-1.39001	4.53174	2.85217	4.16854	3.72288	6.67353	0.486398	1.80576
TCGA-50-8459	-0.459805	2.76701	3.05854	5.49405	3.37618	8.15547	3.94141	3.84562	0.717585	2.96264	5.61015	-3.69761	3.08471	0.304832	2.53208	4.11878	1.29059	2.9115	-1.37493	-0.0667252	2.37341	4.12867	-2.03951	2.88068	4.3954	2.48987	6.01736	1.6128	3.10044	0.946477	4.80582	-1.50638	-6.69076	2.80227	-1.60953	0.997934	-4.17291	5.55185	3.22718	-0.338784	4.01145	-2.21491	3.76849	1.30866	3.19702	3.39397	6.59351	-0.14128	-1.55465
TCGA-95-7944	-0.867997	3.27893	3.42818	5.44307	3.87409	9.09301	4.31353	4.32568	1.91216	3.27849	5.42323	-3.35253	3.24892	1.13392	4.54276	4.61263	2.39767	4.39953	-0.563695	0.562904	2.11231	4.39706	-2.36156	2.4744	4.43805	1.84897	5.90266	1.42759	3.308	1.66502	4.94457	0.938131	-6.73131	2.27816	-1.58819	1.96219	-4.26524	5.78485	2.30343	-0.197371	3.95372	-2.05189	4.44331	1.88358	3.19018	3.45753	6.14752	-0.0191102	0.57471
TCGA-44-3918	0.298131	5.18643	1.72297	5.41844	3.08332	7.74541	3.04947	4.53273	2.10869	4.149	5.03055	-2.397	3.11791	5.16192	3.79137	4.92672	2.98341	2.76409	-0.0989204	2.06171	2.48001	5.14864	-0.224434	2.57991	4.476	3.26809	5.89014	0.888392	4.79678	4.42943	4.54199	1.02148	-1.64174	2.6116	-0.892222	0.973436	-3.86457	5.09406	4.70121	-0.0669714	5.02879	-0.864612	5.02929	2.13464	3.08018	4.03525	6.93397	1.77189	3.62734
TCGA-78-7155	-0.91877	4.20479	1.62352	5.43753	3.86511	7.65487	4.09704	3.86941	1.52362	3.58709	4.2852	-2.86469	2.27449	6.21675	3.97506	4.38929	6.29792	4.16194	-0.0269278	0.597578	2.22738	4.78692	-1.93998	2.95168	4.60842	1.39817	5.66105	-0.370438	4.5659	4.93505	5.04955	2.97805	-2.74124	1.99275	-0.575253	1.37119	-4.78328	5.72059	2.75316	-0.144773	4.12675	-1.13547	5.01546	4.45891	1.40223	3.59138	6.73621	0.456857	5.15605
TCGA-78-7220	-0.761567	3.48794	2.4376	5.49301	4.56812	8.89852	3.83538	4.16268	2.59837	3.60241	5.1574	-1.83028	2.95812	4.49579	3.36733	5.55315	4.01896	4.77855	0.189263	0.200454	2.98538	5.06663	-1.99662	2.09954	4.46375	2.28996	5.66354	0.781862	3.82647	2.7309	4.7544	1.91338	-4.7264	2.44378	-1.07471	2.74161	-3.60779	5.78964	3.44515	0.103241	4.38496	-1.30319	4.63142	2.73668	3.15294	3.78859	6.59199	0.731616	2.40761
TCGA-44-A4SS	-0.656818	3.49905	2.97752	5.45852	4.6902	8.02368	3.48265	4.56975	1.89183	3.61724	5.66815	-2.5484	3.6998	2.67889	3.48396	5.45532	2.60138	3.4098	-0.143003	0.854622	3.65125	4.61625	-1.96866	2.24139	4.40899	2.66902	6.01452	1.54965	3.79134	1.99601	5.00984	1.11807	-5.87713	2.66202	-1.36014	2.36064	-3.00555	5.80598	3.36493	-0.0350273	3.93091	-1.87086	4.64974	2.36545	3.86823	3.59563	6.7087	0.864791	-0.221792
TCGA-05-4433	-0.633117	3.73747	2.92008	5.50214	5.11661	8.41341	3.61048	4.61774	2.37405	3.47248	5.71078	-2.62487	3.95419	1.46767	3.61383	5.70704	1.82737	4.49571	-0.285414	1.11823	3.29695	4.68334	-2.14113	2.22891	4.37269	3.482	6.00354	1.81579	3.54233	1.48733	4.82184	0.187521	-5.40321	3.45644	-1.32894	3.35492	-2.37974	5.76871	4.07724	0.132626	4.5873	-1.59207	4.00571	1.66908	4.12516	3.70788	6.99767	1.10874	1.72326
TCGA-55-A491	-0.736919	3.55354	3.002	5.41505	4.16674	8.94483	3.35806	4.29597	2.00982	3.64608	5.71997	-2.48056	3.66372	3.22729	3.88369	4.86062	3.13416	2.99943	0.0826179	0.536317	3.52451	4.81881	-2.03795	2.22963	4.45065	2.34435	5.96328	3.00298	3.92415	2.27664	4.96971	1.25415	-5.91272	3.50504	-1.38692	2.48203	-3.99115	5.64958	4.07228	-0.0510702	4.23489	-1.93614	4.99108	2.60394	3.86765	3.50355	6.84511	0.928929	0.949091
TCGA-50-5933	-0.786015	3.37616	3.4138	5.55527	4.21275	7.86112	3.26648	4.43938	1.43909	2.84757	5.57377	-3.41389	3.40563	2.99131	3.76655	4.869	3.09333	3.20864	-0.696725	0.0792594	2.11298	4.23209	-1.91983	2.4495	4.4097	2.35005	5.9915	0.454049	3.56913	2.42031	4.95394	1.01887	-5.34055	2.65985	-1.14565	1.33938	-4.04094	5.83065	3.61115	-0.200763	3.66311	-1.83976	4.18268	2.29344	2.91971	3.34974	6.34007	0.21749	1.14837
TCGA-69-7761	-0.587853	3.75105	2.8679	5.42947	4.12958	7.71782	3.00834	4.60863	2.1384	3.95683	5.36736	-2.65311	3.41623	2.36613	3.59645	5.19189	2.20082	3.14176	-0.598558	1.06477	2.50234	4.95159	-1.78458	1.8114	4.4004	3.14903	6.01659	1.27951	3.61721	1.78447	4.75902	0.0682033	-5.2375	2.46152	-1.15111	2.2682	-4.3813	5.62141	3.94092	0.0219652	4.40669	-1.66245	4.40167	1.57754	3.42316	3.76064	6.91844	0.371081	1.15285
TCGA-91-6830	-0.57127	2.98787	2.48244	5.49833	3.62622	7.93447	3.59865	4.2101	1.25609	3.31773	5.52571	-2.5131	3.33966	3.88185	2.82844	4.87535	3.38653	2.99847	0.0684742	0.22922	2.95827	4.63077	-1.54179	2.28563	4.42426	2.84639	6.00528	2.13204	3.56945	2.1241	4.85339	1.26962	-5.59848	2.36006	-1.22865	1.42567	-3.66232	5.32053	3.80705	-0.103147	4.07473	-1.79874	4.52197	2.48924	3.47775	3.4849	6.57368	0.89468	-0.211084
TCGA-55-8619	-0.294478	4.03601	2.93685	5.43354	4.1998	8.04668	3.49634	4.2581	1.89694	2.8889	5.60546	-2.75443	3.46205	1.64049	3.56829	4.91905	1.34609	3.56733	-0.454823	0.455346	3.03389	4.57612	-1.65893	2.55412	4.40346	3.11869	5.99035	2.29396	3.4688	1.47974	4.86557	0.283966	-5.99818	2.91198	-1.41016	2.17223	-3.5716	5.54509	3.72082	-0.0800802	4.37417	-1.87825	4.11336	1.5467	3.82964	3.61751	6.91263	0.742868	0.640982
TCGA-55-7284	-0.362322	3.65363	2.72138	5.51263	4.19462	8.44475	3.26588	4.39356	2.28767	3.01493	5.76941	-2.61937	3.91001	1.92791	3.6281	5.43533	1.36895	4.03481	-0.0854666	0.859783	2.98818	4.63476	-1.65317	2.26916	4.37548	3.41484	6.0731	2.37815	3.57102	1.5567	4.82137	0.442934	-5.33178	3.17181	-1.31553	2.75969	-3.07331	5.50746	3.67014	0.0657824	4.77464	-1.56394	4.17159	1.73961	4.02318	3.83881	6.67721	1.02947	1.00855
TCGA-44-7661	-0.720836	3.42639	2.62645	5.47107	3.66685	7.60316	3.91824	4.35466	1.62822	3.37157	5.4449	-3.32826	3.4748	2.14115	3.91141	4.46894	2.29697	3.49405	-0.797718	0.20789	2.08014	4.39995	-2.00152	2.43166	4.43866	1.94866	5.96662	0.585255	3.47338	2.20158	4.83068	0.123164	-5.70622	2.68196	-1.2674	1.17094	-4.45444	5.7799	3.05061	-0.216018	4.34496	-1.75035	4.12834	1.80144	2.94021	3.38649	6.8278	-0.0115197	0.61713
TCGA-78-7152	-0.843533	3.62877	3.67177	5.4631	4.40381	8.18322	3.14643	4.44491	1.68681	2.29038	5.44664	-3.06242	3.65471	2.50871	3.93724	5.11622	2.29333	4.0206	-0.131339	0.0974981	1.81883	4.57846	-1.79944	1.52435	4.41711	2.77261	5.85059	0.488151	3.53203	2.14446	4.89841	0.437046	-5.62759	2.72514	-1.21956	2.87317	-3.62217	5.66036	3.0538	-0.0278561	4.04013	-1.49784	4.4213	2.30986	3.63116	3.80165	6.34742	0.531458	1.14828
TCGA-78-7540	-0.576191	3.54215	2.49981	5.53184	4.98255	9.53198	3.67874	4.53354	2.65023	3.03452	6.03701	-2.6245	4.65103	0.747539	4.13361	5.54612	0.954404	5.05712	0.999684	0.968287	3.7543	4.5542	-1.91306	1.40522	4.33757	3.54177	6.19547	2.68147	3.72588	1.40801	4.90599	1.32717	-5.75093	3.3452	-1.41442	4.44472	-1.80221	5.72856	4.0709	0.286234	4.81107	-1.53144	4.2562	1.36353	4.54695	4.05174	6.88192	2.10166	1.35625
TCGA-97-8547	-0.509182	3.27253	3.13124	5.47123	4.31755	8.84087	3.60316	4.05157	1.28764	2.92146	5.69778	-2.86712	3.40389	2.67146	3.89372	4.90193	2.38172	3.12828	0.0106746	0.80033	2.7728	4.63161	-1.61793	2.36953	4.41438	2.8709	5.96482	2.72759	3.71474	2.2398	5.04752	0.937725	-6.04565	2.94925	-1.42203	2.0525	-3.50945	5.60416	3.44592	-0.106039	4.26213	-1.83299	4.51493	2.26864	4.01092	3.50749	6.21748	0.675428	0.515559
TCGA-55-6968	-0.342666	5.03269	1.23697	5.23048	4.40202	7.9075	4.96283	4.13116	2.55568	4.87218	4.75485	-1.63659	3.30743	4.7369	5.01165	4.79072	4.40447	4.80001	-0.0386533	0.439063	2.99795	5.9888	-1.38382	2.88234	4.61938	1.55255	5.74951	3.31086	4.74924	4.09129	4.95861	1.89926	-3.26148	3.13002	-0.677672	2.39205	-4.7991	5.38031	3.46301	-0.0717689	4.51147	-1.13801	5.56273	3.4194	2.87371	4.15789	6.99176	1.38188	5.38184
TCGA-78-8662	-1.13201	3.23485	3.00139	5.45814	4.51684	8.6204	3.36703	4.24033	1.9	2.89871	5.14957	-2.46302	2.93301	4.4296	3.27556	4.77314	4.34261	4.01582	-0.0195154	0.103031	3.37756	4.40911	-2.23836	1.50021	4.47554	2.11787	5.74737	0.489412	3.81498	3.16422	5.25882	3.31075	-5.37367	2.24793	-1.14406	2.48915	-3.50822	5.72518	2.74108	-0.00489565	3.57101	-1.69232	4.92793	3.66273	3.49285	3.4233	6.54662	0.75331	2.06812
TCGA-55-6982	-0.628661	2.92952	2.74666	5.49089	4.37408	8.33165	3.44079	4.25128	1.65968	3.72556	5.69657	-2.81086	3.70203	3.27474	3.19283	5.18845	2.98058	2.99085	-0.120474	0.72218	3.04862	4.60524	-1.5767	2.44113	4.41041	3.23738	5.94673	2.15984	3.55022	1.9813	4.92244	0.800864	-5.2023	3.18683	-1.24754	2.09367	-3.21502	5.63197	4.26464	-0.0579082	4.07639	-1.67333	5.06841	2.3234	3.59358	3.58836	6.77137	0.910955	0.0836936
TCGA-MP-A4T7	-0.678502	3.55096	3.21511	5.43991	4.1008	8.63834	3.65113	4.2165	2.1293	2.74339	5.55749	-2.76657	3.25158	1.96205	3.35458	5.30377	2.5531	4.21894	-0.04813	0.220844	2.37704	4.66018	-1.87182	2.08478	4.42701	2.75401	5.79849	0.909031	3.49816	1.92739	4.9002	0.777467	-5.91331	2.77351	-1.4653	3.39722	-3.33064	5.58942	2.87546	-0.0220289	4.33535	-1.6911	4.02883	2.18516	4.00498	3.63213	6.68463	0.276993	1.36843
TCGA-MN-A4N4	-0.879365	3.0828	2.72885	5.4425	4.62528	7.93538	2.96531	4.05455	1.20844	2.51698	5.31034	-3.32969	3.32059	3.11802	2.71961	5.22405	3.18376	2.4841	-0.664124	0.37334	2.83779	4.52001	-2.04473	1.9219	4.43648	2.66419	5.79385	0.79083	3.74544	2.0696	5.19525	0.307033	-5.8938	2.81188	-1.32723	1.99192	-2.80138	5.55356	3.38169	-0.0378994	3.71842	-2.01461	4.57974	2.74856	3.67673	3.41623	6.5229	0.880235	-0.0171309
TCGA-86-8672	-0.911527	2.98175	3.68656	5.4581	3.86349	7.65919	3.6317	4.24977	1.69145	2.79117	5.31791	-3.12428	3.32005	1.81388	3.75134	4.6101	2.56591	3.38226	-0.558438	-0.185679	1.84914	4.45168	-2.30545	2.17347	4.43021	1.9069	5.83777	0.720283	3.22701	1.57049	4.98988	0.0602017	-6.8405	2.74205	-1.33882	1.84372	-4.64832	5.81953	2.69274	-0.12643	3.52332	-2.05799	4.19775	2.16515	3.27273	3.52354	6.29361	-0.0765623	0.0178379
TCGA-55-6981	-0.686132	3.9503	2.45646	5.48189	4.71892	8.78419	3.23947	4.20838	1.85507	3.42793	5.74984	-2.29054	3.88217	3.85282	4.66322	5.23427	3.32746	2.9436	0.45388	1.06287	3.72707	4.39751	-1.32402	1.99574	4.42976	3.01185	6.09755	3.8793	4.254	3.1078	5.08657	2.3349	-5.10145	3.32553	-1.35162	2.49426	-2.68533	5.68759	3.5002	0.0166525	4.36604	-1.65448	5.04668	2.94267	3.85184	3.74353	6.99873	1.60741	1.66284
TCGA-69-A59K	-0.485453	4.67937	2.28634	5.38651	4.12609	8.50861	3.7346	4.1556	1.5589	3.93583	5.39921	-2.08311	3.70486	3.52779	4.95065	4.95028	2.77371	3.43945	0.0137415	1.08635	3.1484	4.73678	-1.1869	2.54298	4.48147	2.86395	5.87966	1.62655	4.29926	3.4533	4.99062	1.86009	-4.53517	3.0057	-1.07815	2.36808	-3.5625	5.6072	3.20713	-0.0764147	4.20923	-1.44553	5.03587	2.5249	3.86242	3.86113	7.20237	1.2319	2.85195
TCGA-05-4434	-0.754392	3.46177	3.43711	5.45627	3.66451	7.28384	3.69573	4.37291	1.63638	3.23224	5.29718	-3.1779	3.33156	2.96779	3.32937	4.8327	2.62546	3.4042	-0.560575	0.472624	2.20718	4.84466	-1.92628	2.17583	4.4202	2.18491	5.87597	1.10138	3.43541	1.79962	4.80637	0.156276	-5.73531	2.26873	-1.33057	1.59425	-4.48768	5.56044	2.99964	-0.133643	3.91603	-1.8611	4.74633	2.18625	3.19692	3.47559	6.61441	0.0763604	0.620492
TCGA-44-7671	-0.765402	2.46963	3.78161	5.58024	4.28001	8.53089	3.10423	4.26465	1.68445	2.74215	5.58606	-2.73057	3.43731	3.06277	2.68349	5.23487	3.53535	3.49003	0.386698	-0.661741	2.56957	4.14509	-1.73237	1.75099	4.39707	2.53709	5.97109	2.43228	3.52462	2.17624	4.9451	1.63084	-5.7949	3.02693	-1.40806	2.09328	-2.6633	5.65013	2.68262	-0.044174	3.92402	-1.55789	3.83601	3.16378	3.74982	3.60188	6.34541	1.00395	-0.160861
TCGA-50-6595	-1.03132	2.2274	3.04302	5.56257	3.68561	7.67769	3.91341	4.24831	1.40894	3.14501	5.57561	-3.96982	3.45225	1.87835	3.03431	4.62907	3.24479	3.33909	-0.979872	-0.145251	2.49224	4.18437	-2.32795	2.57972	4.41274	1.68519	6.05805	0.915208	3.17525	1.48884	4.87355	0.632333	-6.7195	2.54488	-1.46027	0.838777	-5.17422	5.67141	2.73395	-0.236131	3.82292	-2.18778	4.26247	2.10869	2.43607	3.20761	6.29991	-0.0816635	-1.00466
TCGA-50-5066	-0.791165	3.01448	3.61636	5.54414	3.33466	7.67962	3.74984	4.15511	1.68269	3.68229	5.17882	-3.68001	3.45416	2.77888	4.63001	3.91658	3.41471	3.48323	-0.0843116	-0.120767	2.79679	4.93256	-1.86675	2.76763	4.46756	1.61182	5.9733	-0.830038	3.00629	1.82007	4.66931	0.525779	-7.21007	3.65999	-1.31009	1.10166	-6.16668	5.80067	2.6864	-0.349322	3.90683	-1.63979	5.39469	2.59803	1.98839	3.4982	6.26554	-0.4425	0.0165869
TCGA-55-8513	-0.170766	4.5086	3.06545	5.39639	4.06993	8.07644	3.29413	4.33833	1.71275	2.95641	5.29902	-2.53832	3.38809	2.65095	3.93015	4.82811	1.72799	3.33803	-0.181653	0.5175	2.75886	4.62572	-1.38482	2.31107	4.41359	2.93125	5.95278	2.18656	3.81936	2.18559	4.85148	0.498616	-5.24515	2.82067	-1.28637	2.09528	-3.74718	5.34838	3.61273	-0.0743959	4.71531	-1.55784	4.41207	2.06591	3.8077	3.75178	6.96071	1.08207	1.66792
TCGA-MN-A4N1	-0.680551	3.49288	2.9976	5.37768	4.27339	8.86956	3.31326	4.04987	1.81718	3.05174	5.58609	-2.86078	3.85117	3.30464	4.33482	5.07973	3.18894	3.26943	-0.0384494	0.750916	3.51598	4.7278	-1.75547	1.43789	4.4851	2.41826	5.8695	1.93356	4.16942	2.9295	5.2964	2.46295	-5.36937	2.70219	-1.22616	2.55959	-3.32584	5.73569	2.99511	0.0305862	4.16799	-1.72057	5.01102	2.854	3.87954	3.69439	6.84262	0.681245	1.44641
TCGA-78-7535	-0.932904	3.11932	3.23194	5.3466	4.30467	8.10114	3.13938	3.98482	2.18328	3.09747	5.32012	-2.67678	3.76384	2.5244	4.49018	4.82966	2.42999	3.16964	0.093664	0.397854	3.10821	5.03054	-1.73936	1.28942	4.46544	2.4969	5.86323	2.90025	3.69206	1.97625	5.22515	1.65062	-6.66188	2.66849	-1.43329	3.02012	-3.79856	5.59333	2.76912	0.0349776	3.79108	-2.17856	4.74815	2.07391	3.55718	3.47476	6.50068	0.856811	0.265637
TCGA-86-8075	-0.536071	3.54163	2.62124	5.46956	4.24794	8.32155	3.40368	4.34948	1.90996	3.34212	5.32965	-2.49361	3.31694	3.92714	3.93077	4.83217	4.00007	2.87541	-0.266937	0.704456	3.38821	4.76673	-1.52198	2.55188	4.44119	2.70568	6.03009	2.46427	4.26233	3.01181	5.09319	1.34729	-5.16455	3.46607	-1.28558	1.39641	-3.58497	5.55591	3.84409	-0.0737201	4.41931	-1.61368	4.60631	2.99184	3.18178	3.73197	6.52472	0.943836	0.999109
TCGA-62-8399	-0.657991	3.66867	2.03928	5.39961	4.09842	8.63826	3.5222	3.96749	1.33957	2.72528	5.01758	-2.85197	3.08557	4.00516	3.6421	5.13069	4.37222	3.39345	0.0287013	0.56283	2.58852	4.54882	-1.76076	2.81362	4.48969	2.22294	5.79946	1.96428	4.041	3.07004	5.13872	1.44856	-4.81539	2.81068	-1.18456	1.77221	-3.11842	5.46745	3.21016	-0.0755257	4.13916	-1.69583	4.45709	3.33713	3.44408	3.59118	6.70628	1.26561	1.48304
TCGA-55-6970	-0.823791	3.721	3.31092	5.53129	4.15367	7.89628	2.84731	4.49098	1.95173	3.11276	5.3236	-2.57459	3.11516	3.27062	3.64131	5.24832	3.70897	3.47595	-0.0873811	-0.0719638	2.29048	4.75528	-1.81153	2.33813	4.43354	2.69794	5.93419	1.26104	3.64043	2.64812	4.81657	0.91483	-4.81458	3.11231	-1.26227	2.37337	-3.17612	5.67921	2.76657	-0.0753153	4.13961	-1.40842	4.6336	2.74589	3.28329	3.70989	6.58801	0.872591	1.68175
TCGA-44-6145	-0.879319	2.8191	2.98353	5.50048	4.40219	7.50299	2.99179	4.37713	1.66991	3.30091	5.2919	-2.92651	3.44874	3.0596	2.87763	5.30296	2.90826	2.55796	-0.112895	0.455849	2.35625	4.41951	-1.99831	2.05759	4.41176	2.53179	6.00733	1.76925	3.39077	1.47987	4.93878	-0.18554	-6.4587	2.90325	-1.39751	2.09265	-3.8604	5.62112	3.36515	-0.0531743	3.63234	-2.10765	4.22781	2.57225	3.21856	3.52955	6.53201	0.718099	-0.781195
TCGA-44-2656	0.346512	5.02699	1.76209	5.45352	3.20124	7.4454	2.55594	4.53745	1.87089	4.22904	5.04161	-2.70082	3.12581	5.49594	3.57028	4.90925	2.67979	2.55409	0.157424	2.14062	2.27905	4.94371	-0.106975	2.34712	4.46496	3.59365	5.892	0.669987	4.50236	4.1298	4.51455	1.02633	-1.46019	2.4468	-0.856109	1.04657	-3.93113	5.21195	4.52469	-0.0689183	4.99448	-0.735898	5.10752	1.90566	2.77895	4.10581	6.83704	1.46629	3.30565
TCGA-91-6849	-0.588376	3.65183	3.7283	5.53361	4.48954	8.55513	3.26422	4.39411	1.84576	3.07538	5.45969	-2.94579	3.51329	3.39312	3.91963	5.32343	3.14712	3.64218	0.596061	0.173056	2.70094	4.50058	-1.27085	2.041	4.39442	3.1228	5.92346	1.99679	3.63391	2.22372	4.87777	1.01675	-5.39686	3.06659	-1.36824	2.43004	-3.01421	5.55232	2.78727	-0.0817307	4.09511	-1.6633	4.61452	2.84005	3.76241	3.67482	6.83313	0.874946	1.1855
TCGA-49-AAR3	-0.887553	3.18019	3.19775	5.40572	3.70152	7.09289	3.89134	4.18008	1.46987	3.27004	5.25006	-3.41514	3.41229	1.94592	3.8327	4.9803	2.281	3.32888	-0.862792	0.45503	2.4789	4.50407	-2.26296	2.70676	4.46503	1.95973	5.8735	1.75073	3.33377	1.67974	4.96526	0.506283	-6.58314	2.39744	-1.40371	1.41719	-4.98982	5.78266	2.5506	-0.220689	3.60324	-2.17964	4.9739	1.93289	2.70708	3.3625	6.57293	-0.086273	-0.260096
TCGA-62-A46V	-0.714946	3.37487	2.70097	5.42987	3.72731	8.64174	3.75115	4.02105	1.6422	3.39297	5.39303	-2.43983	3.40641	3.5118	3.9129	4.73056	2.5412	3.47282	0.339221	0.285468	2.53855	4.82396	-1.57498	1.90731	4.4473	2.74135	5.9233	2.09571	3.76775	2.88661	5.01224	1.8488	-5.01251	2.53527	-1.22309	2.59727	-3.90329	5.50525	2.78702	-0.106585	3.79691	-1.70442	4.625	2.52617	3.40131	3.5404	6.2874	1.05935	1.25103
TCGA-44-7672	-0.745064	3.2535	3.14625	5.44999	3.98162	7.96508	3.4831	4.20306	1.49272	3.2823	5.45551	-3.31129	3.19178	2.47711	3.57231	4.66668	2.31958	3.10032	-0.848425	-0.0823191	2.45846	4.59177	-1.84147	2.80659	4.42666	2.29311	5.94608	1.71351	3.39594	1.62242	4.86363	-0.241487	-6.34492	2.89472	-1.41182	1.44	-4.4573	5.69271	3.27639	-0.19995	3.95007	-2.09852	4.86151	1.89635	3.207	3.42154	6.8739	0.176377	0.125049
TCGA-50-6590	-0.943984	3.52606	2.95144	5.43489	4.36467	7.17864	3.66831	4.29128	0.993962	3.17586	5.26707	-3.90332	2.95982	2.28567	4.11325	4.91374	3.52192	3.24696	-1.55871	0.109902	1.81494	4.63409	-2.2703	2.98421	4.46127	1.51308	5.79374	0.116008	3.38338	2.04957	4.97346	0.0777672	-5.45901	2.14898	-1.32582	1.1959	-5.07761	5.78903	2.60717	-0.253981	3.35068	-2.28941	4.79606	2.18406	2.22685	3.19117	6.47403	-0.130794	1.08789
TCGA-78-7633	-0.78103	2.89837	3.17284	5.56114	4.59608	9.39716	3.66972	4.33921	1.38964	2.59445	5.64076	-2.11116	3.32865	3.33613	2.82016	5.6656	4.29512	4.31031	0.648415	-0.510184	3.01386	4.21588	-1.51028	2.05062	4.41004	3.30924	5.88604	2.04898	3.65027	2.69803	5.16496	1.7717	-4.88917	3.16131	-1.25994	2.85433	-2.52358	5.58643	3.18826	-0.070855	4.03373	-1.31382	4.2005	3.7368	3.83805	3.68741	6.48437	1.34166	0.995526
TCGA-55-8302	-0.841603	3.72694	2.74209	5.39894	4.38577	7.79136	3.58395	4.29655	1.518	3.19667	5.53341	-2.90059	3.97408	3.13938	3.85147	5.21532	2.03861	3.88553	-0.122404	0.88182	3.08778	4.59502	-2.14418	1.8757	4.42837	2.78006	5.80702	1.69988	3.95682	2.47133	4.96493	1.23442	-5.11021	2.4587	-1.44268	3.29634	-3.13684	5.80494	2.72219	0.0401799	4.27521	-1.66863	4.6772	2.25788	3.77292	3.40422	7.16969	1.08772	1.44958
TCGA-99-8033	-0.888191	3.18043	3.16154	5.4198	3.77461	7.83622	3.53948	4.30867	2.14067	3.69575	5.24813	-2.41068	3.43703	2.96005	3.1595	5.34839	3.61684	3.59277	0.226421	0.372875	2.35779	4.69022	-1.98348	1.76072	4.45045	2.16483	5.89951	2.17637	3.76609	2.31368	4.99828	1.19875	-5.74207	2.9631	-1.26765	2.58927	-3.43117	5.63749	2.92288	-0.0177398	3.69898	-1.68164	4.65521	3.01465	3.35861	3.7529	6.36878	0.763164	0.74503
TCGA-49-AAR9	-1.40023	2.26771	2.79998	5.47265	4.53754	8.53389	3.9577	4.41423	1.97777	3.60651	5.5927	-3.46846	4.00476	3.48997	2.56192	5.72068	3.79356	4.48638	0.668496	0.302009	3.24228	4.41585	-2.6733	1.82509	4.41062	2.38808	5.71013	0.311396	3.53545	2.10804	5.23946	0.268758	-5.28375	2.70163	-1.42577	3.4432	-2.72698	5.89091	2.85218	0.114196	3.53594	-2.03444	4.8651	3.09926	3.36474	3.4297	6.77809	0.552742	-0.69099
TCGA-44-2665	-0.575216	2.86504	3.42435	5.53626	3.33221	7.96674	3.15499	4.03555	1.13284	2.86714	5.56707	-3.73728	3.15938	1.78266	3.00386	4.35469	2.88642	2.72205	-0.73792	-0.0888752	1.68135	4.42986	-1.61724	2.63649	4.40784	2.31183	6.03567	0.98998	3.37073	1.88491	4.89333	-0.652261	-6.95197	3.14337	-1.38119	1.23545	-4.24638	5.42709	3.06393	-0.299858	4.18574	-1.79543	4.30197	2.18891	2.90309	3.55877	6.05698	0.0628805	-0.478607
TCGA-55-8205	-0.785969	3.90955	3.1757	5.44872	4.28619	7.34473	3.63452	4.51313	1.5233	3.49776	5.29142	-3.34716	3.36672	2.37074	4.85805	4.9745	1.83699	2.91572	-0.59269	1.04156	2.25317	4.58334	-2.13379	2.39699	4.45228	2.06565	6.00421	0.587609	3.41054	1.90974	4.84232	0.334428	-5.96978	2.3952	-1.27352	1.87564	-5.07242	5.87019	3.04018	-0.178137	4.20087	-1.88317	4.4137	1.52191	2.7721	3.28734	6.74257	-0.299648	1.45481
TCGA-55-6978	-0.783421	3.11927	2.86942	5.49517	3.5276	7.46195	3.80509	4.38083	1.05931	3.47565	5.37519	-3.50611	3.29339	2.40263	3.5432	4.55778	2.81103	3.04711	-1.06351	0.207095	1.95045	4.42834	-2.08073	2.75513	4.4511	1.85474	6.07319	0.505971	3.42228	2.05637	4.79512	0.0285112	-5.82368	2.61007	-1.28377	0.930134	-5.11358	5.65001	3.18875	-0.270434	4.09735	-1.88705	4.46867	2.09215	2.70652	3.36923	6.47657	-0.131851	0.00758082
TCGA-44-6775	-0.60903	3.45365	2.6584	5.45843	4.09433	7.95701	3.09949	4.25454	1.63276	3.32833	5.20898	-2.85348	3.35664	3.50692	3.77931	4.53265	3.51658	2.56437	-0.44951	0.459825	2.68895	4.8024	-1.50913	2.16923	4.44891	2.68828	6.0131	1.8494	3.86296	2.44024	4.97808	0.553438	-5.63316	2.78783	-1.18071	1.64137	-4.09186	5.45443	3.87829	-0.0943523	4.06324	-1.79536	4.74195	2.57604	3.1983	3.70063	6.50988	0.503311	0.27166
TCGA-05-4397	-0.723525	3.79427	2.50908	5.43419	4.71359	7.94795	3.3364	4.09267	2.11188	3.4175	5.13657	-2.26152	4.00946	2.92913	4.74762	5.61895	4.11323	3.33029	0.289816	1.57563	2.74732	5.40011	-1.61947	2.58061	4.51245	2.08237	5.8019	2.45779	4.02076	3.03511	5.16105	1.90551	-6.64057	3.67854	-1.06626	4.08914	-4.11369	5.60067	3.18688	-0.0581599	3.81936	-1.96493	5.71807	3.14032	2.76182	3.538	6.28347	0.870483	2.62498
TCGA-L9-A8F4	-0.601117	4.42757	2.81792	5.35951	4.23704	7.88709	3.53445	3.99653	1.3565	2.96899	5.15167	-2.83621	2.84952	3.19873	4.19612	4.93198	3.33814	3.49556	-0.505126	0.972852	2.76307	4.92948	-1.8118	2.80064	4.48554	2.36932	5.7166	1.57404	3.90981	2.72183	5.02161	0.676365	-4.93118	2.35578	-1.30038	1.85782	-3.74923	5.53957	2.75636	-0.110782	4.15201	-1.80543	4.8343	2.65694	3.61057	3.43151	6.91184	0.416681	2.18978
TCGA-62-8402	-0.684204	3.8186	2.7916	5.34443	4.00846	8.27339	4.13004	4.29646	2.03398	3.258	5.14716	-2.9591	3.18445	3.29635	4.25842	4.78891	3.00347	3.74178	-0.447616	1.16991	1.92301	4.93865	-1.82746	2.60228	4.4869	2.18215	5.68152	0.59204	3.78924	2.51325	4.82767	0.970846	-5.00975	2.42973	-1.1156	2.31704	-6.0619	5.64581	3.05421	-0.0857123	4.35058	-1.54848	5.50362	2.89665	2.88117	3.7417	6.95835	-0.374733	3.05689
TCGA-73-7499	-0.90599	3.79312	3.24823	5.44557	3.99121	7.88316	3.01394	4.34807	2.51523	2.97015	5.07075	-2.98863	3.81573	3.572	4.61128	4.57985	3.92895	3.01211	0.314036	0.231075	2.7471	5.17687	-1.63434	1.89878	4.47377	1.86822	5.85381	1.33283	3.75253	2.64241	5.00381	0.718821	-6.12151	3.44838	-1.20009	2.27792	-5.60298	5.66375	2.89892	-0.0562332	4.1703	-1.62599	5.76989	3.28668	2.97975	3.6954	6.56155	0.553722	2.03842
TCGA-MP-A4TI	-0.82126	3.27825	3.35122	5.3931	3.50321	7.15945	4.00939	4.30497	1.05729	3.19798	5.25884	-3.74978	3.12792	0.921162	3.46931	4.39023	1.54905	3.13903	-1.26532	0.138565	1.9191	4.42547	-2.36645	2.75458	4.4446	1.63722	5.91928	0.581582	3.26381	1.53203	4.87914	-0.813746	-6.69779	2.31878	-1.45384	1.20943	-4.8817	5.7063	2.57515	-0.324059	3.89514	-2.1328	4.53137	1.512	2.98403	3.21664	6.53271	-0.467672	-0.176804
TCGA-35-4123	-0.933563	3.36089	3.30951	5.48835	3.94409	7.68552	4.09997	4.34181	1.71612	3.33347	5.43458	-3.92938	3.89927	2.70026	4.83142	4.36959	2.26382	3.5204	-0.0697602	0.418164	2.44914	4.88471	-1.95089	2.41803	4.45	1.62696	5.94293	-0.72159	3.36599	1.98237	4.7341	0.0800774	-6.07096	3.29713	-1.34142	1.69787	-5.47315	5.84981	2.84405	-0.236541	4.06196	-1.77411	5.1629	1.94172	2.70217	3.40831	6.58828	-0.279785	0.722337
TCGA-50-6592	-0.940081	3.10967	2.09748	5.4277	4.38106	8.23368	3.55716	4.35309	1.6222	3.4224	5.35454	-2.77906	3.23247	3.53713	2.7587	4.9638	3.86876	3.8523	-1.04922	0.0168655	2.811	4.72071	-2.24057	2.41349	4.426	2.45811	5.70908	-0.313723	3.70086	2.10587	4.81712	0.555012	-5.67565	2.15275	-1.11453	1.53368	-4.2724	5.79802	3.78497	-0.043459	4.03645	-1.80864	4.70308	2.46923	2.86353	3.47977	6.85211	0.0244105	0.017316
TCGA-95-7948	-0.797543	3.24856	3.02952	5.43261	4.38832	8.57763	3.21444	4.11742	1.43525	2.0751	5.4908	-3.01866	3.55039	3.2627	3.74299	4.70384	3.25328	2.54517	-0.211596	0.317492	2.01276	4.51155	-1.6616	1.97453	4.43431	3.18387	5.96376	0.416591	3.51598	2.52475	5.07396	1.20842	-5.49621	2.57655	-1.19989	2.6751	-3.68153	5.42487	3.1986	-0.0680128	3.64687	-1.60563	4.72227	3.03759	3.64765	3.5407	6.26829	0.95405	1.59959
TCGA-05-5420	-0.692041	3.52511	3.96527	5.52305	3.78391	8.09357	3.37106	4.39143	2.22492	3.8852	5.33723	-3.47779	3.23324	1.80661	4.27818	4.61361	1.96172	3.51168	0.0667363	-0.221813	2.50642	5.04707	-1.57547	2.54634	4.44608	2.12175	6.05916	-0.047966	2.87758	1.15328	4.39173	0.0745847	-7.36824	3.27651	-1.28375	2.2117	-5.56997	5.71153	3.21233	-0.258858	4.35309	-1.47519	5.81297	1.58439	2.91514	3.59115	6.43695	-0.278633	1.38763
TCGA-95-8494	-0.831325	3.73095	3.15023	5.42273	4.72586	8.20921	2.89864	3.9879	1.59343	2.88332	5.68907	-3.10362	4.07947	2.7303	4.86314	5.24161	1.71716	2.74356	-0.0701222	1.40652	2.39209	4.5209	-1.94055	1.77249	4.45155	2.20607	5.75522	1.79027	3.65714	2.34955	5.09678	1.12037	-6.15598	2.62887	-1.40377	3.5238	-3.84285	5.89294	2.81313	-0.051276	4.09964	-1.93999	4.74775	2.14495	3.78123	3.45404	6.59719	0.433189	1.87841
TCGA-97-A4LX	-0.460258	4.36587	3.16416	5.39738	4.09378	7.65523	3.41861	4.26139	1.56701	2.72386	5.27105	-3.02772	3.26816	2.24619	4.27563	4.7441	2.30098	2.66876	-0.715802	0.510506	2.03227	4.59404	-1.49368	2.8262	4.44629	2.48491	5.87827	1.67019	3.72687	2.25807	4.93515	-0.152476	-5.41046	2.68106	-1.31335	1.71416	-4.15726	5.60323	3.34847	-0.20292	4.15427	-1.83493	4.97468	2.13107	3.61782	3.55154	6.84712	0.365653	1.66569
TCGA-35-4122	-1.0586	2.71754	3.81062	5.58423	3.76345	7.9051	3.58982	4.4736	1.88252	3.53368	5.8404	-3.84041	4.08125	2.71368	4.38632	4.68175	2.82538	3.39346	-0.0525893	-0.0466722	2.95058	4.77978	-2.0451	2.61166	4.41801	1.58658	6.16596	-0.563895	3.07214	1.46854	4.57716	0.671502	-7.37437	3.70792	-1.37199	1.62788	-4.72441	5.83615	3.23091	-0.259383	3.97655	-1.84164	5.36036	2.29432	2.75739	3.34302	6.37776	-0.378442	-0.12558
TCGA-MP-A4TC	-0.743495	2.95719	3.19084	5.46654	4.3787	8.33805	3.19968	4.15949	1.35411	3.11927	5.48004	-3.09	3.53352	2.89984	3.69787	4.84898	3.27371	2.5382	-0.336586	0.596416	2.8279	4.6043	-1.85995	2.27186	4.43434	2.28538	5.95903	1.46774	3.5635	2.01902	5.09403	0.9807	-6.04077	2.94761	-1.38429	1.58132	-4.28917	5.71154	3.28357	-0.0978119	3.73104	-2.08283	4.54105	2.56335	3.34319	3.46525	6.54599	0.504331	-0.267051
TCGA-86-8073	-0.37925	3.75865	2.02249	5.45666	4.62469	8.40165	3.16255	4.27802	1.22858	3.0635	5.33888	-2.32893	3.67184	4.22129	3.62019	5.15387	3.9988	2.49855	0.224427	0.657391	2.98387	4.64553	-1.36803	2.42244	4.45604	3.10615	5.87399	1.6612	4.09516	3.1331	4.97546	1.8471	-3.9267	2.84377	-1.12452	1.82183	-2.91935	5.51712	3.85931	-0.0127052	4.26352	-1.41601	4.49088	3.15757	3.65019	3.67514	6.92457	1.77728	1.43654
TCGA-49-4488	-1.04678	3.39801	3.90578	5.50734	4.67896	8.48496	3.45284	4.40093	2.08098	3.01487	5.63062	-3.18991	3.98866	3.0064	4.66412	4.95572	2.99516	3.81958	0.453689	0.452038	2.9818	4.79436	-1.76825	1.98199	4.41869	2.19059	6.02545	0.358649	3.63497	2.48144	4.98063	1.69297	-5.66461	2.92313	-1.47024	2.55513	-3.6051	5.88732	3.06225	-0.0285951	3.64715	-1.86803	5.24234	2.6961	3.46918	3.61904	6.40875	1.07502	0.819117
TCGA-05-4425	-0.794257	3.10935	3.13285	5.51958	4.26434	8.33442	3.26422	4.178	1.7137	3.02311	5.45273	-3.32578	3.41695	2.38116	3.8333	4.81451	2.4356	2.88912	0.105687	-0.0224137	2.39264	4.77184	-1.80871	1.9209	4.40843	2.72632	6.07576	1.08616	3.3903	1.86354	4.87983	0.295239	-6.12102	2.92308	-1.29985	2.23276	-4.77569	5.65845	3.51652	-0.0814324	4.22225	-1.61674	4.56438	1.90123	3.3169	3.48131	6.65698	0.29856	0.281879
TCGA-50-5939	-0.795945	3.23358	3.38597	5.50346	3.95341	7.35625	3.49404	4.26703	1.54524	3.14765	5.39501	-3.32912	3.25906	2.7177	3.11522	4.99139	2.8974	3.49507	-0.510275	0.0698544	2.18093	4.32803	-2.03897	2.3339	4.4023	2.32704	5.78075	1.0373	3.35404	1.68934	4.87064	0.171162	-5.22063	2.28847	-1.47327	1.85827	-4.03602	5.72671	2.643	-0.150336	3.75969	-2.22048	4.65365	2.20035	3.20148	3.46222	6.76875	-0.147525	0.245896
TCGA-55-8508	-0.580709	4.08658	3.13025	5.35713	4.22432	8.57882	3.65252	4.23873	2.0179	3.21091	5.45482	-2.47464	2.97941	3.40682	4.17568	4.87082	3.28583	3.58414	-0.348205	0.0712008	2.56047	4.96455	-1.56466	2.77682	4.47853	2.12297	5.84899	2.98259	3.98134	2.67961	4.96456	0.706886	-5.34187	2.6893	-1.26895	1.75378	-3.90455	5.52685	2.76942	-0.0867059	4.28044	-1.83345	4.93927	2.96505	3.66741	3.8515	6.81615	0.676045	2.12923
TCGA-44-6776	-0.777537	2.93385	3.32334	5.54667	4.92624	9.23898	2.90158	4.30951	2.12449	2.34849	5.42684	-2.68697	3.67989	3.76925	3.06396	5.50186	3.58619	3.7118	1.48822	-0.269152	2.84743	4.24663	-1.57981	1.43419	4.39067	3.35054	5.92766	2.66106	3.56106	2.27069	5.10054	1.74644	-5.33719	3.54985	-1.35957	3.24029	-2.01917	5.6234	3.09857	0.0913131	4.09284	-1.38932	4.06224	3.54303	3.88872	3.87416	6.26229	1.88532	0.665322
TCGA-MP-A4TK	-0.509477	3.52761	2.69109	5.45212	3.75054	7.98944	3.71471	3.95503	0.816468	3.00559	5.47243	-3.1603	3.22994	2.45323	3.56553	4.71871	2.68072	2.98416	-0.823017	0.745401	2.27712	4.37262	-1.64047	2.87614	4.44125	2.68537	5.8417	1.90151	3.50031	2.00132	4.95774	-0.541046	-5.74648	2.76481	-1.39986	1.52719	-3.53562	5.5391	3.32824	-0.203693	4.15867	-1.94213	4.50099	2.18713	3.53532	3.50822	6.69018	0.410973	0.516531
TCGA-44-6146	-0.471646	3.30688	2.74524	5.53875	4.45964	9.00479	2.70939	4.52169	2.6599	3.31546	5.65769	-2.57792	3.85179	3.28408	3.15649	5.6691	2.19609	3.85319	0.577043	0.893569	3.15509	4.49404	-1.86121	1.05832	4.36449	3.87117	6.13353	1.48365	3.8649	2.30854	4.78116	2.33833	-4.84286	2.98459	-1.10344	3.23445	-2.61638	5.65503	3.96268	0.224506	4.64023	-1.13965	3.47443	2.31135	3.7985	3.87814	6.54822	1.51456	1.56783
TCGA-44-7662	-0.866069	2.93693	2.96566	5.49158	4.08944	7.657	3.31342	4.12212	1.5529	3.04835	5.29356	-3.17175	3.48115	2.60284	3.08307	5.0137	3.41554	2.92954	-0.481032	0.425223	2.5732	4.69415	-1.97019	2.28184	4.45466	2.27717	5.94085	1.99684	3.55646	2.22286	5.04346	0.804807	-6.22666	3.08133	-1.31137	1.65985	-4.04216	5.7341	3.03608	-0.120251	3.61698	-2.04164	4.68931	2.68096	3.00033	3.36105	6.51116	0.734773	-0.335725
TCGA-64-1679	-0.885852	2.67178	2.77772	5.56888	4.369	7.74903	2.87926	3.97858	1.05443	3.18849	5.58154	-2.91991	3.59274	3.92856	2.60286	5.08534	3.76274	2.70608	-0.523394	0.278558	3.04182	4.21598	-1.90827	2.56421	4.41476	2.5131	5.97973	2.27853	3.91489	2.38365	5.06223	1.53014	-5.67489	3.05793	-1.34104	1.67993	-2.91184	5.62592	3.64404	-0.0847607	3.96295	-2.09389	4.00755	3.07871	3.20888	3.44735	6.71036	0.986365	-1.17198
TCGA-50-6594	-0.679909	3.66746	2.55969	5.55823	4.58201	8.0977	3.51612	4.21354	2.18313	3.43775	5.55303	-2.97945	3.97483	3.7479	3.85791	4.97469	2.62717	3.33479	-0.232408	0.999943	2.29895	4.58088	-1.55485	1.87953	4.43101	2.75287	5.81325	0.721666	3.75991	2.52013	4.8967	1.40086	-5.08865	3.20427	-1.23634	3.08487	-3.64859	5.7742	3.50588	-0.0924811	4.32942	-1.4688	5.02935	2.55977	4.04721	3.40734	7.1616	0.918956	2.45886
TCGA-38-4625	-0.971923	3.27154	3.55078	5.54416	4.20458	7.19737	3.46099	4.44676	1.65385	3.33353	5.58729	-3.26018	3.87538	2.29547	4.47191	5.0814	2.67481	3.38744	-0.352533	0.727539	2.49754	4.61501	-2.21418	2.36608	4.44202	1.64609	6.0075	0.462931	3.44599	2.46309	4.78911	2.00609	-7.11184	2.3853	-1.29513	1.89929	-4.67679	6.04454	2.29927	-0.237065	3.56474	-1.96505	4.99625	2.14995	2.19866	3.13885	6.10383	0.0849995	0.313822
TCGA-35-3615	-0.729098	3.22176	3.75694	5.54479	4.08391	8.81434	3.15438	4.41254	1.8911	2.17246	5.58217	-3.18366	3.49689	2.89768	3.89568	4.97914	3.08441	3.75827	0.831684	-0.30368	2.17923	4.47893	-1.62968	1.92477	4.41072	2.82206	5.9214	0.505214	3.38622	2.22771	4.90266	0.351241	-5.84665	3.72575	-1.28635	2.88681	-3.11554	5.61417	2.63754	-0.0976168	4.12411	-1.28554	4.62847	2.94127	3.91796	3.75631	6.12732	0.911855	1.32931
TCGA-69-7763	-0.708485	3.03708	3.34853	5.52952	3.91399	8.83354	3.74949	4.23237	1.37251	2.44124	5.58903	-3.06987	3.26643	2.4064	2.6394	4.96213	2.90779	3.69853	-0.297414	-0.168877	2.43329	4.38086	-1.88633	2.51148	4.40792	2.79024	5.93663	1.1195	3.47829	2.06786	4.91299	0.44079	-5.15192	3.18011	-1.40139	2.0028	-2.95894	5.53169	3.05901	-0.111631	4.27524	-1.54765	3.84046	2.63221	3.59823	3.60996	6.53925	0.924401	0.401043
TCGA-86-8055	-0.511786	3.47063	2.94853	5.51343	3.89678	8.17241	3.16852	4.24949	1.32795	3.35914	5.6047	-2.84595	3.26463	3.45892	3.20116	4.91433	3.36425	2.85974	-0.557143	0.535456	2.95843	4.44087	-1.51575	2.7201	4.42169	3.01231	6.06242	2.31306	3.98658	2.59492	4.98828	0.969032	-5.21897	3.06125	-1.31082	1.42316	-3.65104	5.48608	3.70528	-0.145118	4.43482	-1.68024	4.38423	2.61226	3.17945	3.67986	6.71455	0.608978	0.214639
TCGA-49-6767	-1.00866	3.406	2.79041	5.49571	4.78068	7.14829	4.21261	4.31612	1.95647	2.80384	5.50145	-3.97783	3.84009	2.50606	4.84516	5.00022	2.57215	4.02712	-0.763552	0.810609	2.48683	4.58332	-2.2233	2.19278	4.44479	1.89072	5.8777	-0.789574	3.67571	2.68563	5.04702	0.997163	-5.06941	1.89351	-1.40791	1.81498	-5.3787	5.94483	2.43843	-0.0972204	3.92752	-1.84079	5.05326	1.74351	2.23981	3.1995	6.63586	0.288996	2.3097
TCGA-55-8085	-0.728226	3.72546	3.13851	5.39836	3.81939	8.06936	3.4227	4.38821	1.79543	3.2208	5.20089	-2.56795	3.2695	3.00923	4.01807	5.07995	3.85409	3.68398	-0.381913	0.333394	2.12254	4.75749	-1.60894	2.25414	4.46159	2.10389	5.81748	1.28896	3.73144	2.57354	4.95732	0.396804	-5.16094	2.95227	-1.20503	1.95377	-4.56299	5.63959	2.84386	-0.125066	3.98861	-1.5159	5.07223	2.95121	3.14185	3.6843	6.66854	0.0844781	2.10861
TCGA-69-7978	-0.629727	4.05255	2.73176	5.43009	4.38054	7.58294	3.4542	4.37115	1.07513	3.15665	5.55815	-3.19651	3.36339	3.12812	4.3747	5.02535	2.60607	2.96002	-0.716997	0.570092	2.09176	4.47294	-1.71243	2.80226	4.42954	2.25914	5.86035	1.17914	3.78823	2.33511	4.93419	-0.0484923	-5.30716	2.43136	-1.30649	1.57074	-3.85771	5.71281	3.28322	-0.171687	4.30721	-1.92079	4.54772	2.06959	3.31483	3.49046	6.92025	0.508016	0.853865
TCGA-44-6777	-0.552167	3.36658	3.33735	5.55301	4.27011	8.05216	3.19767	4.09906	1.17104	3.28823	5.60409	-3.12602	3.07673	2.34502	3.28519	4.49065	2.58336	2.51957	-1.25253	-0.212185	2.54765	4.18125	-1.42976	3.15848	4.39594	2.72877	6.0105	2.20153	3.32825	1.83397	4.90238	-0.20925	-6.12068	3.06518	-1.37547	0.845234	-3.99167	5.65721	3.78149	-0.342982	4.07448	-1.912	4.51769	1.78548	3.07179	3.49681	6.63534	0.10003	-0.619214
TCGA-05-4426	-0.819352	3.42486	2.9079	5.48009	4.02969	7.67066	3.3921	4.14996	1.62686	2.32016	5.62952	-3.63715	3.56217	3.60663	4.42624	4.50789	2.46017	2.95269	0.425751	0.324104	1.92806	4.62062	-1.90805	1.50475	4.41449	2.59464	5.91488	0.484084	3.64704	2.43083	5.02734	0.630365	-5.56015	2.94872	-1.36353	2.37686	-3.97882	5.68502	2.92306	-0.0779189	4.35806	-1.87546	4.32977	2.53928	3.50742	3.4197	6.89229	1.07551	0.879607
TCGA-MP-A4SY	-0.425135	3.80019	2.68216	5.45432	3.88058	8.42116	3.57358	4.16985	1.25943	2.83744	5.4722	-2.81757	3.48368	2.81663	4.14556	4.81649	2.55364	2.89669	0.0746724	0.275099	1.88893	4.94005	-1.21615	2.12166	4.41775	2.58359	5.79996	1.23677	4.05514	2.88337	4.97481	0.47148	-4.78058	2.77947	-1.22653	1.85057	-3.67523	5.66923	3.23579	-0.107747	4.4512	-1.49119	4.58178	2.385	3.93343	3.73466	6.71515	0.482668	1.59357
TCGA-44-2662	0.459725	4.90697	1.50512	5.45797	2.9895	7.64869	2.8313	4.42369	1.97022	4.925	5.06713	-2.46521	3.00046	5.59962	3.59674	5.08764	3.2378	2.37446	0.0369066	1.93949	2.4614	5.12797	-0.243971	2.64843	4.47809	3.06529	5.92647	1.08337	4.81537	4.38931	4.48392	1.42211	-1.88197	2.68202	-0.876437	0.869486	-3.49317	5.31907	4.51466	-0.0912083	5.2325	-0.836743	4.83604	2.26352	2.82769	4.00555	6.8838	1.58785	3.19009
TCGA-55-8094	-0.433543	3.81273	3.1528	5.41656	4.89815	9.67938	4.50574	4.15302	2.84476	3.88162	5.68941	-1.28664	3.81535	3.96229	4.08167	5.26036	3.34211	5.57649	1.4322	0.928913	4.35099	5.22438	-1.52825	2.57268	4.50013	2.56664	5.73801	3.8163	4.10565	3.08508	4.98047	3.07598	-4.58478	3.62182	-0.990538	2.85461	-2.14404	6.06684	3.17006	0.114001	4.73773	-1.15521	5.61913	3.03393	4.68052	3.91712	7.19151	1.6872	3.77991
TCGA-97-7554	-0.67209	3.51173	3.0492	5.53817	4.43623	8.30925	3.50235	4.50379	1.82838	3.01447	5.63076	-2.88773	3.52843	3.45202	3.60666	5.05789	2.89457	3.24282	-0.329046	0.424325	2.69921	4.44093	-1.5204	2.52998	4.4271	3.00425	6.12492	1.85122	3.80062	2.6213	5.03941	0.836867	-5.11921	3.26728	-1.21616	1.55505	-3.33899	5.59358	3.73619	-0.0981507	4.30321	-1.65858	4.55545	2.61083	3.63887	3.55901	6.60079	1.20141	0.913956
TCGA-97-7552	-0.5133	4.01326	2.8661	5.42212	4.18358	7.68172	3.25274	4.46407	1.96691	3.26029	5.22426	-2.93207	3.35338	2.64771	3.64574	4.79936	1.6871	3.69188	-0.631084	0.373084	2.39216	4.7558	-1.82218	2.13904	4.40536	3.11674	6.0186	1.3799	3.56027	1.74763	4.73746	-0.250491	-5.08599	2.64609	-1.18224	1.97791	-4.22012	5.54677	4.07137	-0.0164969	4.55294	-1.59247	4.47803	1.72131	3.17029	3.82708	6.9257	0.708886	1.10422
TCGA-05-4382	-0.58114	3.63947	3.36088	5.43309	4.37244	7.94719	3.70926	4.37378	1.45831	3.09723	5.46686	-2.73	3.19595	3.365	3.6758	4.93891	3.44148	3.0593	-0.532016	0.276636	2.66208	4.80379	-1.46703	2.65763	4.44061	2.52594	5.93277	1.64842	3.7629	2.30242	5.03212	0.49213	-5.38537	2.75427	-1.23738	1.43096	-3.82656	5.51639	3.36961	-0.178161	4.09798	-1.80899	4.78129	2.81585	3.1667	3.55582	6.6578	0.440727	0.51782
TCGA-86-7955	-0.985822	3.89905	2.75921	5.44196	4.79525	8.28756	3.10999	4.03866	2.08963	3.3346	5.38717	-2.25806	3.63228	4.62557	4.4429	5.39942	3.82814	3.88716	1.32881	0.989191	2.11091	4.85993	-1.64773	1.27005	4.48028	3.0274	5.7647	1.99346	3.98785	3.38111	5.06132	3.27867	-4.76725	2.5745	-1.05446	4.29533	-2.11412	5.7136	2.65427	0.168378	4.40598	-1.34231	5.48746	3.49052	4.47774	3.62317	7.46976	1.67759	3.46874
TCGA-86-8054	-0.440627	4.41951	1.81918	5.41471	3.83307	8.746	4.61561	4.06556	2.53717	3.47621	5.11487	-2.59075	2.86266	4.20634	4.64943	4.41535	4.70249	4.90833	0.382274	0.401642	1.7562	5.37831	-1.25074	2.75997	4.57185	1.511	5.69789	0.858701	4.30631	4.30477	4.86554	1.3959	-3.26819	3.32665	-0.863739	2.32877	-4.87679	5.60436	2.79007	-0.110948	4.98424	-0.722594	5.0703	3.90664	2.96971	4.1753	6.89997	0.689854	5.51582
TCGA-55-8091	-0.611568	3.57624	3.10395	5.50147	3.96869	8.28858	3.19875	4.0966	1.3277	2.76462	5.67568	-3.73497	3.39112	2.76505	3.78177	4.79245	2.89769	2.59289	-0.325493	0.455778	2.20224	4.38174	-1.40861	2.85834	4.40706	2.52552	6.01109	1.73629	3.73784	2.26814	4.87547	-0.0230226	-5.85193	3.084	-1.43415	1.54359	-3.85381	5.44836	3.16114	-0.174285	4.55674	-1.81809	4.64075	2.14483	3.22217	3.61593	6.87743	0.677581	0.313308
TCGA-55-8096	-0.35478	3.84153	2.85847	5.4113	4.01672	7.75581	2.96453	3.97556	1.61104	3.23637	5.29069	-2.88778	3.18456	3.00387	3.58383	4.78285	3.0802	3.02401	-0.422644	0.561376	3.01189	4.78596	-1.23147	2.33094	4.4428	3.06525	5.85897	2.80818	3.81926	2.34031	4.87844	0.893499	-5.64277	2.75278	-1.19832	1.9365	-3.63235	5.36016	3.32057	-0.113175	4.59042	-1.48775	4.95453	2.15266	3.25289	3.77951	6.81324	0.550785	0.853144
TCGA-38-A44F	-0.417665	3.76433	2.9356	5.39449	3.52804	8.06998	3.71046	4.1412	1.75424	2.99031	5.38927	-3.24688	3.53082	2.17426	3.74128	4.6165	1.44481	3.48549	-0.311197	0.365965	2.83587	4.70855	-1.74574	1.91808	4.4154	2.72406	5.98959	1.21824	3.42498	1.53297	4.7498	-0.357512	-5.90012	2.61546	-1.38948	1.95159	-4.37451	5.4896	3.24156	-0.0955048	4.49963	-1.71823	4.51532	1.60888	3.41747	3.71262	6.83892	0.405203	0.497336
TCGA-55-8204	-0.874658	3.00475	2.49967	5.52578	3.53127	6.91297	2.9919	4.02465	1.19934	4.22113	4.97101	-3.44335	3.25589	3.40071	2.48382	4.52207	2.82791	2.67939	-0.96162	-0.0474003	2.89871	4.47567	-2.35038	1.2535	4.43582	1.54256	5.88011	1.48054	3.60323	2.11916	4.70973	1.47202	-5.72696	1.24259	-1.3022	0.92823	-5.40891	5.60952	2.22819	-0.17398	3.55297	-1.83361	4.88348	2.43089	1.91792	3.52984	6.64167	0.260155	-0.449771
TCGA-J2-8192	-0.388039	3.45254	2.75304	5.51279	3.7277	7.96435	2.87515	4.20362	1.1976	3.03874	5.41664	-3.25989	3.38953	3.57094	3.30961	4.79982	2.94707	2.30333	-0.204128	0.7399	2.4903	4.42874	-1.16575	2.31284	4.4134	3.18644	6.04297	2.12116	3.79085	2.27365	4.93348	0.148135	-5.43895	2.94537	-1.31637	1.53008	-3.76775	5.33141	3.47974	-0.131422	4.57769	-1.55548	4.63063	2.4743	3.25785	3.70573	6.89615	0.697424	0.306327
TCGA-91-6836	-0.944018	4.31811	2.13317	5.44531	4.6545	7.93968	3.87129	4.13385	2.10657	3.36458	5.15206	-3.08164	3.33285	3.94491	4.76048	5.19951	4.44932	4.02813	-0.0473995	0.733144	1.65176	5.03526	-1.75138	2.76623	4.5097	1.87119	5.60519	-0.31207	4.28624	3.91127	5.11745	0.927893	-4.31374	3.14915	-1.02229	2.59383	-4.6162	5.95166	2.73994	-0.0571983	4.26731	-1.39443	5.15721	3.64041	2.45415	3.73288	7.07194	0.423026	3.46556
TCGA-91-A4BC	-0.42879	4.06288	3.06494	5.32182	3.58558	8.17747	4.00665	3.99261	1.33011	3.35842	5.11088	-2.93459	2.73455	2.10148	4.09715	4.23284	2.81173	3.04325	-0.771402	0.609016	1.86254	5.04696	-1.62624	3.25343	4.50808	2.01332	5.81293	1.61439	3.54166	2.08887	4.93214	-0.513617	-5.68815	2.82278	-1.19661	1.11134	-5.46295	5.52883	3.06422	-0.247267	4.05937	-1.95965	5.33506	2.24123	3.21045	3.60055	6.87746	-0.0297885	1.99299
TCGA-55-1596	-0.930336	3.14802	3.06007	5.46296	4.29662	8.0189	2.86795	4.21643	2.40897	3.61448	5.42633	-2.42056	3.99126	2.80729	3.50257	5.63238	3.6989	3.15648	0.341529	0.667134	2.86736	4.86072	-1.8857	1.80579	4.45724	2.78996	5.94729	1.85155	3.62261	2.39839	4.92955	2.10662	-5.75814	3.59586	-1.20971	2.89286	-4.11956	5.75143	3.12983	0.0770236	4.18086	-1.47868	5.70253	2.74332	3.62077	3.72541	7.1302	0.762635	1.43466
TCGA-69-8453	-0.530807	3.76451	3.17044	5.46321	4.21086	8.10769	3.64344	4.35586	1.85613	3.17355	5.44405	-3.17922	3.76121	1.18002	3.61218	5.07997	1.21402	3.99489	-0.288644	0.553248	3.09528	4.65969	-1.99385	2.25247	4.39544	2.75894	5.98103	1.35933	3.4207	1.42572	4.78628	0.00424476	-6.11568	2.97997	-1.45028	2.31867	-3.90517	5.64777	3.31875	-0.0706129	4.43929	-1.74339	4.35277	1.41122	3.58229	3.61835	6.84597	0.449754	0.576372
TCGA-50-5044	-0.823228	2.18406	3.54168	5.52351	3.02651	8.23461	4.41812	4.09561	1.33422	3.29653	5.76841	-3.92291	3.32166	0.686971	3.30012	4.10424	2.16157	3.43229	-1.03346	-0.475411	2.47405	4.07979	-2.21346	2.95189	4.41932	1.42353	5.98232	1.12361	3.07915	1.31166	4.89404	0.236516	-7.11543	2.84232	-1.69024	0.808337	-5.09686	5.80553	2.19454	-0.388192	3.71953	-2.20829	3.93016	1.946	2.55701	3.26367	6.42923	-0.807775	-1.57163
TCGA-55-7576	-0.904176	3.59699	3.02801	5.44926	4.44294	8.11824	3.4482	4.56092	1.54287	3.26057	5.49256	-2.91859	3.73313	3.53849	3.85661	5.23297	3.01791	3.57843	0.212655	0.58859	2.75754	4.73144	-1.84173	1.94214	4.44533	2.79533	5.92682	1.22015	4.0078	2.88641	5.07829	0.99171	-4.25873	2.93557	-1.23139	2.45147	-3.2016	5.67521	3.34742	-0.0120597	4.1476	-1.5868	4.70894	2.85245	3.71356	3.49073	6.7251	1.20114	1.155
TCGA-NJ-A4YQ	-0.742473	4.76612	3.24844	5.40391	4.41834	7.33885	3.33302	4.38442	2.0236	3.94813	5.07959	-2.28109	3.25535	3.35295	4.63352	5.10419	2.89158	3.37972	0.148234	0.3083	2.49182	4.85552	-1.46648	2.03383	4.45863	2.75548	5.77576	2.54868	3.93311	2.62934	4.97176	0.910101	-5.15797	2.42369	-1.24381	2.80324	-3.77996	5.53504	2.93388	-0.0809587	4.1686	-1.73813	5.23395	2.55885	4.03662	3.67991	7.12527	0.708869	2.87153
TCGA-05-5715	-0.649236	3.53783	3.1368	5.51408	4.74072	8.86081	3.41936	4.34754	2.57021	3.60973	5.49004	-2.47485	3.8757	3.0748	3.50843	4.95241	3.03731	3.80317	0.841724	0.0266065	3.36076	4.70752	-1.33604	1.6065	4.40644	3.22266	6.0691	2.86456	3.63848	2.40453	4.963	2.07563	-5.5665	3.53267	-1.25888	2.83832	-3.22914	5.64165	3.5787	0.012488	4.35569	-1.24764	5.19508	2.87929	3.23543	4.05212	6.55978	1.3805	0.836646
TCGA-44-6147	-0.457545	3.9865	2.81933	5.42169	4.07483	8.17168	3.08858	4.09832	1.68782	3.05761	5.1759	-2.66705	3.51801	3.38872	3.51915	4.80625	2.97324	2.85938	0.0754444	0.209032	2.79955	4.80638	-1.36526	2.25128	4.44761	2.78171	5.96159	2.47022	3.99893	2.71464	4.89748	0.994341	-5.01166	2.95071	-1.23661	1.79232	-3.59803	5.40628	3.65333	-0.0608205	4.4807	-1.43043	4.72531	2.72785	3.54861	3.77001	6.70587	1.44604	1.08675
TCGA-49-AARQ	-0.652696	4.75557	2.45093	5.21892	4.73595	8.36224	3.73946	4.20709	2.60134	3.67682	4.96137	-2.30601	3.35992	3.96706	5.77721	4.82887	3.41955	3.6449	0.182203	1.98265	3.74359	5.50125	-1.59095	2.33418	4.54386	2.09405	5.74083	2.9008	4.5498	3.51482	5.2828	2.6814	-5.79452	2.8098	-1.18479	3.79672	-5.41253	5.63095	3.07701	0.0877793	4.47987	-1.70538	5.33234	2.89655	2.66211	3.71542	6.80074	0.868238	4.06807
TCGA-49-4490	-0.673556	3.13081	3.56887	5.46094	4.19874	8.25262	3.41944	4.0471	1.92258	2.62391	5.58364	-2.90353	3.67985	3.09277	3.52406	4.81976	2.78696	3.56954	-0.360021	0.639788	3.72244	4.58111	-1.68778	2.04679	4.42166	2.87936	5.91764	2.47692	3.79692	2.23638	5.07848	1.70077	-5.97829	2.95133	-1.48025	2.23628	-3.49465	5.57836	3.27005	-0.029071	4.22579	-1.55676	4.4294	2.68897	3.5102	3.60607	6.46408	0.7111	0.436595
TCGA-50-5946	-0.926172	2.99715	2.8948	5.45956	4.05016	8.13557	3.67705	4.08861	1.25729	3.11528	5.39737	-2.64835	3.2312	3.55397	3.24457	4.66784	3.99405	3.11885	-0.600218	0.154725	2.63657	4.48807	-1.89987	2.66439	4.4776	2.09628	5.9669	1.95659	3.83491	2.8266	5.21488	1.05626	-5.59661	2.75098	-1.09243	0.686126	-4.34206	5.54881	3.48821	-0.143719	3.90301	-1.81183	4.51484	2.98184	2.73287	3.4779	6.55362	0.544842	-0.098791
TCGA-05-4384	-0.420242	3.85841	3.21979	5.48474	3.98598	8.3638	3.49044	4.25667	1.5928	2.73537	5.29071	-2.83942	3.4021	3.24098	3.6301	5.2271	2.86828	3.59367	0.511794	0.316948	2.3527	4.45983	-1.30905	2.1038	4.42852	2.90134	5.82186	1.79887	3.83137	2.66281	4.8929	0.957282	-4.70433	2.71494	-1.35843	2.64157	-3.01734	5.40463	2.8104	-0.0744196	4.25903	-1.30664	4.36043	2.77737	3.84427	3.82648	6.74225	1.02348	1.85754
TCGA-93-A4JQ	-0.519428	4.05714	2.89219	5.37044	3.73592	8.00136	3.67446	4.19048	1.34378	3.28278	5.12266	-2.8473	3.09652	2.52197	3.75636	4.6136	2.50787	3.1696	-0.663149	0.677027	2.52717	4.7506	-1.64553	2.36348	4.45184	2.51005	5.86075	1.33492	3.82213	2.35679	4.93217	0.237509	-5.52635	2.40639	-1.2878	1.37238	-4.68156	5.48436	3.79376	-0.15658	4.32783	-1.72465	4.43157	2.13218	3.37824	3.59992	6.82079	0.0834609	1.02464
TCGA-44-8117	-0.755719	3.45147	2.59257	5.46872	4.95343	7.93249	3.52916	4.18729	1.96234	2.95643	5.55452	-2.70294	3.46611	4.05571	3.7064	5.40043	3.22539	3.34554	0.287084	0.777253	2.99551	4.73776	-1.54679	1.9347	4.45714	3.0249	5.83258	2.25933	3.78183	2.92703	5.16948	1.90481	-4.54284	2.43287	-1.17815	2.54124	-2.63259	5.71693	2.98576	-0.0331038	4.16712	-1.72755	4.96345	2.82364	3.88748	3.47934	6.67778	1.51792	1.3123
TCGA-50-5049	-0.730749	3.36045	3.16863	5.48503	3.8718	7.71856	3.65512	4.247	1.48714	3.36429	5.14442	-3.28162	3.27005	2.3195	3.96388	4.40146	3.04673	2.91156	-0.76736	-0.0825053	2.49879	4.67737	-1.76113	2.73409	4.45463	2.31402	5.99544	0.325499	3.24613	1.76887	4.78979	0.292452	-6.39931	2.92	-1.28564	1.30563	-5.40374	5.5993	3.34019	-0.309668	3.93261	-1.79	4.87229	2.32192	2.61925	3.54381	6.73115	-0.0915578	0.0653239
TCGA-62-A472	-0.661262	4.31841	2.98717	5.41365	4.09824	8.26019	3.25748	4.42309	1.65124	3.05011	5.36066	-3.11012	3.81614	2.94816	4.63193	5.08412	2.11	3.31155	0.219469	1.24651	2.38384	5.14209	-1.54369	1.8286	4.46181	2.71201	5.83533	0.11369	4.01514	2.99019	4.86999	0.468944	-4.56122	2.67872	-1.21504	2.93611	-3.87536	5.61339	3.17584	-0.00247364	4.48422	-1.2829	4.77724	1.96705	3.82628	3.60841	6.76473	0.96472	2.82481
TCGA-97-8175	-0.571863	4.17792	2.43299	5.45954	4.90103	8.51152	3.35858	4.47948	2.15401	3.33158	5.67998	-2.88766	4.1153	3.60364	5.36578	5.04643	1.93177	3.37844	0.521035	0.715197	2.93281	4.77362	-1.36496	1.69064	4.42821	2.4246	5.9985	1.29753	4.16644	2.98284	4.90452	1.67096	-5.25925	2.7849	-1.31797	2.91357	-3.65781	5.78464	3.12884	0.0087957	4.76911	-1.59369	4.79543	2.14914	3.53701	3.74843	6.98017	1.21121	2.20995
TCGA-55-8301	-0.704594	3.78449	3.38062	5.40067	4.01259	7.63726	3.54232	4.26949	1.70444	3.2973	5.31217	-2.84733	3.22232	2.59996	4.20183	4.52038	2.84584	3.04677	-0.840719	0.574258	2.12766	4.70677	-1.69522	2.7572	4.46609	2.17555	5.96977	1.61786	3.60218	2.21914	4.99184	0.701228	-5.88551	2.82894	-1.25007	1.64249	-4.85502	5.61381	3.20205	-0.19047	3.97513	-1.89042	4.97144	2.54139	2.92303	3.54443	6.72761	0.294696	1.3724
TCGA-49-6761	-0.915981	4.38575	3.29701	5.50225	4.15627	7.96002	3.37942	4.46612	2.13346	2.82684	5.56707	-3.47406	3.54948	2.83281	4.92988	4.56597	2.82371	4.03232	-0.261231	0.036747	2.27158	4.51805	-1.8648	2.31984	4.43939	1.95216	5.81627	-0.14154	3.90641	2.85589	4.92329	0.36628	-5.02519	2.76211	-1.29469	1.71241	-4.01728	5.81189	3.25203	-0.119821	4.09796	-1.61479	4.60279	1.86518	3.12014	3.57611	6.59179	0.211405	3.03124
TCGA-78-7161	-0.533455	3.54272	3.50628	5.4302	3.95196	9.2567	3.60484	4.0368	1.52633	2.72675	5.37134	-3.08293	3.14648	3.9967	3.88198	5.03592	3.61226	3.57833	0.475141	0.223768	2.09739	4.81882	-1.39738	2.36353	4.45538	2.92795	5.72403	1.65447	3.88444	3.04767	4.97329	1.1603	-3.81157	3.04821	-1.35156	2.16919	-4.12949	5.49596	2.74186	-0.035513	4.49162	-1.51514	4.87214	3.12188	3.61968	3.86231	6.92564	0.719991	2.57655
TCGA-44-3919	-0.678055	3.83479	2.6735	5.42019	4.40555	8.23881	3.47684	4.33397	1.71782	3.33081	5.1683	-2.75146	3.49982	3.92731	4.31062	4.81497	2.87942	3.21748	-0.233205	0.484455	2.86856	4.87272	-1.5452	2.05072	4.45607	2.54554	5.9479	1.72828	3.99401	2.71483	4.97821	0.720665	-5.50536	2.89687	-1.21602	1.90251	-4.28947	5.58705	3.54446	-0.0684734	4.50473	-1.59935	4.73195	2.69354	3.38428	3.64898	6.81706	0.965668	1.33856
TCGA-86-8674	-0.995124	3.08149	3.45627	5.46568	4.31283	8.7844	3.11435	4.18784	2.1209	2.18531	5.43892	-2.88204	3.43306	2.86549	3.62943	5.36066	3.8889	3.74303	0.640113	-0.505433	2.12162	4.48139	-1.78266	1.52131	4.41668	2.40005	5.86112	1.61451	3.77761	2.61899	5.12447	1.52559	-5.92692	3.2323	-1.43123	3.07464	-2.93539	5.62644	2.33204	0.0339916	3.81053	-1.50138	4.50036	3.52387	3.8252	3.77125	6.2546	0.959187	1.71317
TCGA-44-2659	-0.412476	3.82083	3.07806	5.46913	4.43862	8.29864	3.18426	4.35606	1.37038	2.42624	5.57803	-2.84983	3.30216	2.90499	3.81877	4.95519	2.82776	2.71573	-0.317865	0.0493057	2.5567	4.30988	-1.18298	2.73938	4.42499	3.06815	6.07468	1.38394	3.80457	2.49711	5.0593	0.682074	-5.59805	3.40749	-1.12826	1.52517	-3.35967	5.46966	4.39713	-0.135606	4.5506	-1.35832	4.47553	2.46213	3.27313	3.77288	6.56966	0.909704	1.2955
TCGA-55-7728	-0.365831	4.19487	3.31018	5.33967	4.43137	7.92205	3.77028	4.32153	2.09296	3.10714	5.42637	-2.92007	3.61021	0.802578	4.29565	4.81151	-0.173038	4.09833	-0.181026	0.898934	3.2752	5.09328	-1.95445	2.26994	4.41097	2.90355	5.83574	2.61057	3.5783	1.30496	4.82625	-0.167876	-6.04979	2.80645	-1.56081	3.26491	-3.7158	5.62111	3.32444	-0.0031083	4.62425	-1.87475	4.59358	0.780269	3.88331	3.59884	6.93597	0.576297	1.37677
TCGA-55-7816	-0.23327	3.27421	3.12393	5.4693	3.17683	8.12009	3.71349	4.06652	0.576399	2.90861	5.26603	-2.95413	2.95097	2.46425	3.02902	4.54728	3.00546	2.93362	-0.343324	0.634698	1.91471	4.56203	-1.31327	2.89994	4.43938	2.61055	5.94902	1.15263	3.36803	2.029	4.82209	0.369934	-5.36256	2.41046	-1.17419	1.41322	-4.25804	5.26459	3.54352	-0.332685	4.20955	-1.82902	3.90554	2.01059	2.74887	3.37759	6.37158	0.641799	0.213311
TCGA-55-A57B	-0.390798	4.00039	2.8114	5.42202	3.74811	8.50615	3.52213	4.23051	1.50773	3.01197	5.4841	-2.45426	3.51965	3.68781	3.84608	4.89842	2.51321	3.26986	0.0590358	1.13936	3.21736	4.32065	-1.36457	2.18357	4.4389	3.37474	5.92598	2.35306	3.98072	2.84852	5.07386	2.02958	-4.74031	2.58125	-1.3141	2.48103	-3.30496	5.36376	3.21442	-0.0639156	4.54837	-1.48339	4.41882	2.79003	3.77154	3.76309	6.70593	1.1254	1.15239
TCGA-69-7980	-0.767734	3.57072	2.57116	5.41788	4.18702	8.2958	3.29711	4.28112	1.38142	2.25187	5.41258	-2.92258	3.34033	3.244	3.14169	5.01221	3.0469	3.60559	-0.70249	0.300269	2.47351	4.37346	-1.77892	2.55397	4.43298	2.61824	5.86905	1.65074	3.90926	2.45445	4.99612	-0.0698407	-5.45263	2.83453	-1.23589	2.1123	-3.22086	5.4369	3.66225	-0.0634108	4.30165	-1.77417	4.585	2.72495	3.71217	3.61319	6.55791	0.504011	0.89246
TCGA-97-7941	-0.300983	3.56541	2.62739	5.40796	4.11587	8.698	3.71654	4.12565	1.69051	2.32401	5.56384	-2.70117	3.44732	2.22375	3.50241	4.77094	1.993	4.03507	-0.176823	0.543418	2.7299	4.83435	-1.74761	1.87863	4.4078	3.20661	5.94869	1.53279	3.64723	1.85134	4.91309	0.745181	-5.49915	2.91719	-1.33439	2.47922	-3.3149	5.59102	3.70647	0.0103429	4.73997	-1.43967	3.97856	1.81654	3.72818	3.75602	6.59265	0.690221	0.85215
TCGA-55-7727	-0.562639	4.47845	2.3399	5.50204	4.41441	7.82092	3.2357	4.5658	2.02451	3.614	4.99523	-2.43828	3.48176	4.80126	4.39662	4.80318	3.76476	3.31537	0.634084	0.729261	2.20308	5.15485	-1.16397	1.62266	4.4673	2.68319	5.86376	0.452754	4.23999	3.69003	4.81551	1.24214	-3.73448	2.93164	-0.990138	2.11964	-4.38599	5.6952	3.61007	-0.0233677	4.45961	-1.03866	4.95877	2.89916	3.08279	3.88974	6.91358	1.0738	3.24012
TCGA-67-3774	-0.596669	3.77409	3.44831	5.48986	4.02731	8.41039	3.41993	4.24105	1.78939	3.0608	5.37	-2.77345	3.117	3.3588	3.39731	5.10259	3.17736	3.57296	-0.145831	-0.131161	2.59588	4.69475	-1.4438	2.36618	4.40594	2.85273	5.82712	1.88107	3.57259	2.2915	4.7975	0.935842	-5.34234	2.93465	-1.29819	2.05266	-3.92838	5.47491	3.24883	-0.142543	4.1726	-1.66234	4.57629	2.77699	3.72203	3.72086	6.78086	0.409451	1.36405
TCGA-L4-A4E5	-0.740382	4.23085	2.84568	5.33531	4.38541	8.04179	3.64901	4.26923	2.08818	3.25646	5.21755	-2.43174	3.70645	3.80309	5.02618	4.88553	3.251	3.31049	0.426699	1.2085	2.89778	5.13692	-1.66202	2.08993	4.49776	2.37571	5.78778	1.93069	4.38863	3.50501	5.27859	1.38467	-4.40144	2.66717	-1.18529	2.65116	-3.74425	5.70337	2.97671	0.0523953	4.15065	-1.6763	5.14979	2.91444	3.79441	3.73423	6.54944	1.1914	3.0212
TCGA-38-4629	-0.867262	2.86008	3.76816	5.58892	4.0963	7.70936	3.52876	4.18038	1.49257	3.23807	5.70771	-3.83246	3.82934	2.08571	4.13629	4.60191	2.64484	3.05885	-0.593241	0.0669109	2.45302	4.51446	-1.82127	2.49803	4.40656	2.07348	6.00849	0.424178	3.18001	1.6388	4.8553	0.632074	-6.7142	2.92126	-1.4341	1.48622	-4.97399	5.87253	2.72406	-0.259992	3.92986	-1.96762	5.12402	2.00198	2.65707	3.24934	6.72784	-0.489853	-0.102475
TCGA-97-7937	-0.833578	3.47131	2.48699	5.45922	5.03412	8.24319	3.17695	4.12847	1.84687	3.18996	5.2465	-2.53837	3.8828	4.04923	3.98131	5.68583	3.62644	3.20448	0.905972	1.27004	2.7587	5.12316	-1.54262	1.68045	4.46146	3.463	5.87407	1.61299	4.11532	3.23116	5.14533	2.63847	-4.96562	2.84781	-1.11638	3.64717	-2.91255	5.57229	3.34785	0.134665	4.09215	-1.54915	4.59685	3.09923	3.52202	3.69407	6.61573	1.85039	1.36015
TCGA-55-6712	-0.804899	3.22101	3.27286	5.48176	4.49805	7.5232	2.80956	4.44713	1.22026	2.90294	5.59142	-3.53372	3.89397	3.51575	3.75166	5.23433	2.15691	3.01054	-0.358305	0.70334	2.34042	4.28774	-1.86121	2.04652	4.40594	3.15965	6.02197	1.19503	3.47363	1.90574	4.9038	0.613326	-5.16364	2.67071	-1.29577	2.08875	-3.10444	5.73075	3.41719	-0.032231	4.181	-1.80127	4.80224	1.9435	3.34282	3.49634	7.08029	0.7976	0.313023
TCGA-55-8090	-0.684518	3.43058	2.99334	5.49663	3.98327	8.25442	3.47435	4.26953	1.56921	2.64746	5.73786	-3.33519	3.79517	2.75157	3.6965	5.01276	1.62063	3.43525	0.203557	0.651553	2.40097	4.54295	-1.69538	2.26304	4.4098	2.8268	5.96589	1.8452	3.64088	2.05865	4.84934	0.0523196	-5.35459	3.01363	-1.44469	2.4239	-3.43765	5.59025	2.8138	-0.0358463	4.53532	-1.83178	4.32608	2.10861	3.68779	3.63287	6.96461	0.851378	0.967111
TCGA-55-6972	-0.870328	3.48061	3.30461	5.51969	4.46355	8.60023	2.59589	4.26003	1.853	2.43003	5.51273	-3.14348	3.91746	4.09251	4.30822	5.3982	4.12734	3.8356	1.11843	-0.240095	2.31364	4.82421	-1.58401	1.40767	4.45715	2.66036	5.81106	0.207588	3.66487	2.90858	5.04465	1.45019	-5.49373	3.53168	-1.29096	3.82643	-3.26529	5.49567	2.53524	0.0532227	4.15226	-0.971096	4.82699	4.03365	3.94905	3.74455	6.55396	1.11337	2.92548
TCGA-97-A4M6	-0.394667	3.82392	3.34875	5.39323	3.81399	7.47511	3.47371	4.2671	1.6945	3.00657	5.28717	-2.78243	3.38878	3.25467	3.59301	4.76665	2.56671	2.96374	0.16702	0.636537	2.51818	4.82179	-1.51012	2.34703	4.43099	3.10874	5.8319	2.75418	3.75048	2.2184	4.96303	0.475488	-5.33366	2.87448	-1.33778	2.36438	-4.1251	5.35347	3.31055	-0.10723	4.28647	-1.66488	5.05803	2.54712	3.49577	3.75346	6.78672	0.602221	1.22963
TCGA-78-7149	-0.731472	2.52249	3.41355	5.44847	3.65804	8.61049	3.62831	4.0221	1.40982	2.41628	5.45787	-2.66878	3.3643	2.62468	2.70577	4.81853	2.90351	4.11217	0.0538747	-0.43753	2.44762	4.29811	-1.64007	1.66799	4.43565	2.81741	5.83049	1.5444	3.31896	2.14172	5.01028	1.49412	-5.50546	2.36857	-1.30937	2.2536	-3.57253	5.52189	2.73349	-0.110396	3.67476	-1.44638	4.41613	3.02044	3.36072	3.7899	6.16761	0.465867	-0.0404758
TCGA-78-7167	-0.621604	3.30209	3.3945	5.4073	4.35071	8.30857	3.38903	4.16218	1.11099	2.21383	5.1683	-2.66223	3.05507	3.43976	3.21776	5.43445	3.38484	3.93163	0.311196	-0.140432	2.09268	4.64423	-1.50879	1.49295	4.44408	3.13709	5.69596	1.35939	3.86984	2.90103	5.06448	1.24479	-4.05911	2.01831	-1.16091	3.00049	-3.32368	5.48204	2.76692	-0.00683687	4.29683	-1.12694	3.69095	3.38323	3.39996	3.9131	6.51156	0.715326	1.86638
TCGA-95-7567	-1.0235	3.003	2.96599	5.46758	4.54187	8.05569	3.43454	4.44857	1.80664	2.90548	5.52598	-3.1044	3.72715	2.60188	3.51593	5.22028	2.71014	3.75701	-0.088168	0.0839983	2.28345	4.54462	-2.09938	2.24212	4.45025	2.48443	5.94367	0.365303	3.57533	2.51954	5.05807	1.06883	-5.70803	2.87956	-1.18163	2.25116	-3.99792	5.76199	3.2267	-0.071284	3.64599	-1.75244	4.61927	2.62955	3.37336	3.33609	6.61659	0.697555	0.677251
TCGA-86-8076	-0.552747	4.22543	3.58588	5.42925	3.67848	7.57757	3.04944	4.34393	1.84438	2.95078	5.18116	-3.18925	2.90865	2.82588	4.04216	4.37813	2.51699	3.4006	-0.733131	-0.263979	1.72763	4.58934	-1.61047	2.1345	4.44201	2.31711	5.85364	0.845757	3.58242	2.34581	4.78278	0.0617311	-5.17367	2.3687	-1.29955	1.56291	-4.77433	5.50718	2.82717	-0.188964	4.26288	-1.47472	4.65731	2.22565	3.02993	3.75077	6.61296	0.16593	1.83776
TCGA-55-6979	-0.612273	3.84571	2.88379	5.44226	4.13293	7.99277	3.23649	4.36915	1.88064	3.62679	5.24457	-2.92454	3.51253	3.37453	4.23949	4.68502	2.80644	2.71337	-0.162334	0.729009	2.68119	4.86267	-1.69577	2.35249	4.46012	2.32506	5.9609	1.82899	3.8648	2.3425	4.87859	0.758526	-5.8262	3.03756	-1.3377	1.50888	-4.6038	5.59185	3.43683	-0.118688	4.2348	-1.82873	5.00581	2.32531	3.32828	3.5582	6.76405	0.680567	1.17035
TCGA-69-7764	-0.637338	3.63357	3.05102	5.47508	4.25634	9.53495	3.33276	4.53314	1.48359	2.96143	5.51076	-2.11481	3.54607	4.63705	3.55872	5.69248	3.97687	3.22707	0.994219	0.796903	2.60446	4.87708	-1.32716	2.12469	4.4498	3.29889	5.98981	2.49624	4.13686	2.89696	5.02705	0.934075	-4.13881	3.25194	-1.17315	3.05798	-2.6999	5.32218	3.71389	0.0486924	4.47418	-1.32926	4.36378	4.06107	3.97037	3.74206	6.56951	1.65852	1.98793
TCGA-78-8660	-0.889165	3.71575	3.15484	5.42801	4.36034	7.65901	3.71493	4.33067	1.52906	3.62814	5.24272	-2.64717	3.52111	2.92737	3.85863	5.25124	2.72918	3.92493	0.00845897	0.524281	2.49059	4.47925	-1.98982	2.45291	4.45735	2.34152	5.78772	1.58525	3.59712	2.08538	5.04251	0.561461	-5.28091	2.85792	-1.23979	2.54795	-4.0183	5.78328	3.04544	-0.0474716	3.93587	-1.85931	4.72888	2.42131	3.44097	3.57908	6.75589	0.219977	1.57972
TCGA-44-3398	-0.437642	3.4428	3.2975	5.58289	3.59862	8.14178	3.47282	4.17469	1.72946	3.10808	5.53457	-3.5605	3.42123	2.4756	4.01936	4.31896	2.2413	3.13244	-0.189654	-0.188714	2.49275	4.72972	-1.15484	2.43123	4.39278	2.37736	6.08655	0.105793	3.18349	1.75747	4.57765	0.0752741	-6.45375	3.2886	-1.3911	1.41417	-4.91042	5.56557	3.04647	-0.269038	4.40412	-1.63504	4.82771	1.9182	2.90807	3.71905	6.45872	0.101113	0.775892
TCGA-55-8511	-0.713372	4.23933	3.60496	5.44359	4.8554	7.71505	3.31902	4.34455	1.66289	2.80836	5.38178	-3.01318	3.47136	2.81298	4.13688	4.95972	3.11123	3.04533	-0.621558	0.902805	2.30895	4.54861	-1.84765	2.51966	4.43045	2.45572	5.79321	1.12063	3.67171	2.25697	5.11712	0.658534	-5.73086	2.91076	-1.2967	2.33041	-3.44637	5.81561	3.02068	-0.0591054	3.93801	-1.91149	5.09213	2.46932	3.68598	3.57785	6.89243	0.389953	1.31826
TCGA-44-4112	-0.762552	3.66508	3.56576	5.52605	3.7885	8.46463	3.5085	4.34254	1.75418	2.86556	5.51171	-3.33587	3.66905	3.02395	4.22084	4.55094	2.99608	3.4606	0.236853	0.016786	2.24932	4.74633	-1.40942	2.22547	4.42547	2.2717	5.9649	0.209082	3.66976	2.58514	4.8816	0.0831973	-5.97839	3.49995	-1.2443	2.33442	-3.52971	5.56091	3.07086	-0.140095	4.34999	-1.54463	4.81051	2.77576	3.43312	3.86934	6.47429	0.553322	1.2673
TCGA-78-7156	-0.643808	3.21974	3.44688	5.52284	4.11864	8.74553	2.97483	4.30079	1.18317	2.11455	5.40631	-2.71837	3.47767	3.63075	3.25059	5.54396	3.65663	4.05732	0.769871	0.0551749	1.78248	4.32671	-1.21611	1.58321	4.42814	3.39097	5.81401	0.9803	3.60753	2.65387	4.92822	1.34202	-4.84181	2.68515	-1.15482	3.64505	-3.08484	5.32913	2.79951	-0.023221	4.3686	-0.987373	4.44123	3.66631	3.76336	3.89213	6.32706	1.04609	1.92197
TCGA-J2-A4AD	-0.785894	3.27797	2.16706	5.41782	3.72164	7.92785	2.64985	4.18058	1.52394	3.37403	5.33526	-2.29112	3.51842	4.63219	3.14803	5.11651	3.88971	2.69184	-0.0430387	0.600959	3.39105	4.78726	-1.5572	1.34147	4.45741	2.95732	5.85954	1.47839	4.12948	3.26916	5.09868	2.97891	-4.59308	2.111	-1.11182	2.479	-3.15078	5.38004	3.01733	0.0441247	3.916	-1.6295	4.83858	3.17426	3.70826	3.59134	6.84032	1.18875	1.02985
TCGA-86-8279	-0.792915	2.94798	2.69419	5.44803	4.12653	8.47888	3.32727	3.90276	1.44227	3.1373	5.35551	-2.5509	3.35938	3.47154	3.51026	5.04744	3.45343	2.62331	0.206007	-0.143176	2.90075	4.67269	-1.58344	2.29826	4.44923	2.62207	5.90429	2.83855	3.86799	2.77376	5.21047	1.98133	-5.80751	3.0199	-1.20709	2.309	-3.37978	5.47914	3.58808	-0.0582229	3.72127	-1.8197	4.63958	3.20166	3.58987	3.53539	6.43704	1.0191	0.537432
TCGA-86-8074	-0.692651	3.57079	2.67022	5.4598	4.16623	8.09565	3.2537	4.24168	1.74032	3.15075	5.0498	-2.97353	3.47954	3.94347	4.1346	4.71704	3.89321	3.02775	-0.209193	1.14985	2.60543	4.81145	-1.72653	2.29466	4.44982	2.35427	5.78706	1.66412	4.12796	2.98699	5.08618	1.03048	-5.11111	2.94757	-1.23415	1.80875	-4.37332	5.65811	3.3042	-0.0441408	3.97426	-1.85009	4.88461	3.035	2.82009	3.72159	6.28749	0.54628	0.834611
TCGA-55-7911	-0.687094	4.15297	3.13613	5.41272	4.21859	8.29161	3.82412	4.58921	1.95211	3.43666	5.36327	-2.64483	3.52359	3.20278	4.34621	4.89476	1.89327	3.92998	-0.0810051	0.721597	2.26795	5.04757	-1.54822	1.86412	4.46236	2.66557	5.91082	0.576213	3.89795	2.90429	4.81814	0.54105	-5.0569	2.52742	-1.12843	2.67196	-4.26852	5.66654	3.0682	-0.0883653	4.43916	-1.44423	4.91165	1.87478	3.59786	3.5642	6.81007	0.630338	2.35784
TCGA-S2-AA1A	-0.328468	4.07309	2.96839	5.40918	3.64503	8.48522	3.18339	4.19187	1.59023	3.06146	5.50477	-3.02167	3.14751	2.13613	4.22299	4.54031	2.0041	2.62568	-0.38499	0.521101	2.34533	4.52607	-1.40665	2.55799	4.41608	2.92917	6.07781	2.04861	3.50051	1.67164	4.92506	-0.402638	-5.9577	2.96297	-1.35018	1.45906	-4.42419	5.39332	3.84531	-0.160843	4.39443	-1.93235	4.43522	1.89444	3.80112	3.80022	6.68781	0.271928	0.807733
TCGA-86-7713	-0.55756	4.18943	2.80105	5.36123	4.19119	8.97266	3.63167	4.30314	2.09152	3.46621	5.21988	-2.11114	2.95957	4.17335	4.31031	5.50675	3.96347	4.25362	0.387747	1.45442	2.40353	5.06471	-1.68554	2.21627	4.49558	2.82161	5.86281	1.91614	4.43401	3.83663	4.88708	3.03023	-3.30965	2.93904	-1.09622	3.08604	-3.07133	5.68783	2.8975	0.0168472	4.76403	-0.763147	4.83198	3.37822	3.61432	3.81115	6.87424	1.06051	4.1069
TCGA-49-AARO	-0.6634	3.68562	2.71343	5.38236	3.67181	7.75724	3.75938	4.1102	1.04552	3.09836	5.37059	-3.30161	3.5171	2.83698	3.94757	4.72103	2.06345	3.11127	-0.603278	0.470256	2.54392	4.54394	-1.76369	2.10949	4.44372	2.50562	5.88256	1.96861	3.62737	1.93263	4.95936	-0.292013	-5.86429	2.38976	-1.40738	1.68498	-4.07984	5.43443	2.90446	-0.148946	4.22195	-1.95801	5.00742	1.98534	3.6502	3.52041	6.91071	0.318203	0.438562
TCGA-64-5778	-0.780086	3.85212	3.53111	5.47005	4.58126	8.51072	3.39896	4.45412	2.34911	3.00127	5.119	-2.87314	3.82775	3.72877	4.89955	4.52975	3.16597	3.8344	0.449948	0.477304	3.20419	5.12264	-1.74585	1.02945	4.45554	2.10131	5.91365	0.277038	3.83601	2.45569	4.84997	1.25016	-6.50634	2.99903	-1.34664	2.83244	-4.37858	5.75195	3.1038	-0.043452	4.28494	-1.4962	5.02127	2.94985	3.56132	3.49244	6.83091	1.02273	1.84684
TCGA-53-7626	-0.640371	3.62566	2.6936	5.47244	4.24848	7.98926	3.21887	4.27614	1.49292	2.95547	5.17314	-3.03005	3.46725	2.69983	3.25716	5.02204	2.52476	2.93893	-0.414779	0.538715	2.52359	4.55202	-1.53206	2.50407	4.43712	3.07469	5.95443	1.01096	3.69705	2.37449	4.94046	0.348414	-5.48374	3.03066	-1.29124	1.69552	-3.90576	5.51069	3.69093	-0.137839	4.19605	-1.61085	4.55473	2.27384	3.2056	3.54721	6.73017	0.737945	0.54407
TCGA-78-7147	-0.689435	3.61899	2.71604	5.38296	4.37041	8.24851	3.21211	4.15551	2.23753	2.78852	5.11475	-2.40217	3.62805	4.14464	4.41247	5.03653	4.08354	3.20078	0.661679	0.836651	3.58883	4.89425	-1.76594	1.62681	4.47226	2.53833	5.84333	2.68784	4.18113	3.17088	5.2619	2.76272	-5.38096	3.29359	-1.18213	2.83764	-3.84406	5.61845	3.58761	0.0476133	4.31199	-1.60228	5.10051	3.57608	3.45837	3.75626	6.49084	1.5704	2.39015
TCGA-44-3396	-0.548147	3.88582	3.25615	5.46887	3.96603	8.03153	3.64537	4.3591	1.84011	3.67938	5.36609	-3.04934	3.55237	2.81197	4.56997	4.74495	2.53121	2.91085	-0.630929	0.426629	2.53817	4.69882	-1.46336	2.37793	4.44596	2.1128	6.04017	1.16377	3.72556	2.2625	4.81759	0.761457	-6.22142	2.61361	-1.31227	1.59124	-4.51394	5.65943	3.34442	-0.211107	4.24272	-1.75874	4.78273	2.16994	3.38393	3.59346	6.85348	0.125228	1.26262
TCGA-71-6725	-0.932934	3.59626	3.04145	5.47435	5.41601	8.22765	2.46586	4.36476	2.26973	2.59142	5.57101	-2.35243	4.38395	3.69669	4.73322	5.71576	3.08842	2.64862	1.00241	0.881581	3.08544	4.73607	-1.51221	1.05602	4.42681	3.19045	5.95597	3.2091	4.15555	3.12742	5.20592	2.79991	-5.4467	2.97549	-1.24457	4.23656	-2.60894	5.52462	3.07439	0.209034	3.95742	-1.78831	4.69172	2.90211	4.27913	3.66384	6.5532	2.24512	2.32091
TCGA-64-1676	-0.963921	2.91432	3.80811	5.56333	4.08801	7.35369	3.1844	4.23803	2.22771	3.50688	5.4321	-3.54058	4.18261	2.40469	4.00031	5.01195	2.34835	3.19669	-0.0108707	0.353424	2.79388	5.16174	-1.55196	1.97283	4.41005	2.30691	5.94277	0.600496	3.22769	1.9969	4.75584	1.27199	-6.89383	3.10218	-1.33806	2.80443	-4.71804	5.82999	2.70268	-0.167986	3.89891	-1.80537	5.63601	2.07873	2.81694	3.51246	6.54469	-0.16334	0.575716
TCGA-55-6986	-0.502408	4.20712	3.03655	5.50763	4.0372	8.49635	3.36417	4.25943	1.73932	2.3719	5.49797	-3.2197	3.33516	3.02294	4.6209	4.69975	2.71623	3.55569	-0.0373055	0.0564145	1.87046	4.54293	-1.44663	2.12502	4.41669	2.62682	5.83724	1.22641	3.7294	2.73553	4.84249	1.0266	-4.8981	2.75084	-1.28437	1.9767	-4.36951	5.74164	2.98552	-0.111668	4.55776	-1.30257	4.42461	2.35276	3.47671	3.7653	6.63366	0.260189	2.7541
TCGA-62-8394	-0.748189	3.48537	2.41889	5.3602	4.74319	8.70263	3.27962	4.1572	2.10785	3.01706	5.03645	-2.49633	3.71192	4.64617	4.09388	4.99943	4.21307	3.24414	0.679032	1.21007	3.51645	5.02663	-1.80634	1.79249	4.48259	2.35478	5.77788	2.44301	4.21649	2.77765	5.26205	1.95674	-5.57168	3.33507	-1.23126	2.54805	-4.26964	5.68009	3.65908	0.115059	4.27437	-1.81395	5.25223	3.66677	3.16257	3.7384	6.54404	1.44617	1.56081
TCGA-05-4403	-0.743507	2.81118	3.60348	5.57166	4.58841	8.58822	3.71396	4.4357	2.42673	2.94124	5.8678	-3.30669	4.11826	0.525561	3.14279	5.18639	0.816955	4.59827	-0.243429	0.156238	3.21022	4.60586	-2.21737	1.74044	4.33602	3.01135	6.11648	1.53668	3.03174	0.688925	4.68356	-0.00516141	-6.47624	3.39619	-1.53131	3.18722	-3.27152	5.73858	3.51397	0.0783102	4.31507	-1.77014	4.32281	1.25979	3.72902	3.73978	6.68962	0.788542	0.121658
TCGA-05-5428	-1.04822	2.87998	3.61716	5.57488	4.46211	8.23673	3.37421	4.29206	2.20554	3.70229	5.37475	-3.03492	4.00897	3.04729	4.57788	4.90784	3.05682	3.75044	0.0610962	0.0606406	3.17554	5.38512	-1.64435	1.4688	4.45407	2.20139	5.98501	-1.6703	3.31513	2.31112	4.83115	2.21605	-6.29531	3.49134	-1.17245	2.80852	-4.90814	5.89227	2.9348	-0.103087	3.93567	-1.32964	5.22897	2.57973	2.77282	3.68533	6.37901	-0.107443	0.788062
TCGA-38-4632	-0.851137	3.04012	3.50164	5.54063	4.29492	8.4529	3.08995	4.22569	1.91723	3.5505	5.69261	-3.33146	3.93371	2.74407	4.27409	4.93393	2.82599	3.36855	-0.030591	-0.00467375	3.18357	4.89314	-1.79143	2.13655	4.43204	2.24967	6.0495	0.566018	3.39722	2.1705	4.81872	1.76049	-6.47484	3.38345	-1.3858	2.02528	-3.95338	5.95825	2.9823	-0.167605	3.96772	-1.73399	5.52504	2.31483	3.17217	3.4166	6.50597	0.321102	0.395824
TCGA-78-7145	-0.799419	3.7823	2.91364	5.56954	4.33492	8.57967	3.22694	4.36596	1.69987	3.19998	5.51873	-2.55908	3.8307	3.92335	4.20047	5.23668	3.45457	3.92232	-0.440394	0.828178	3.21742	4.63868	-1.56385	2.59849	4.40911	2.81038	5.89231	1.38279	4.11219	3.25658	4.91357	2.32722	-4.39105	3.15911	-1.24857	2.10665	-3.72238	5.81355	3.21112	-0.0528606	4.3505	-1.36905	4.7116	2.66922	3.17596	3.61595	6.8276	0.429989	1.87451
TCGA-55-8614	-0.869306	2.7641	1.91622	5.4581	3.64055	8.32579	2.81841	3.79329	0.363116	2.66372	5.08985	-3.51796	3.25182	3.09328	2.62602	5.20139	3.81743	2.19576	-0.554746	0.603789	2.62196	4.11581	-2.21451	2.34621	4.44698	2.05307	5.83791	1.74804	3.71796	2.37405	5.02154	1.02409	-5.81298	2.62484	-1.39998	1.37972	-3.90014	5.49834	2.69746	-0.117711	3.75842	-1.98977	4.30559	3.21522	2.74647	3.45011	6.73973	0.830142	-0.372372
TCGA-38-4630	-0.883083	3.73101	1.26853	5.30679	3.16604	9.01699	3.94016	3.70226	1.1975	3.51915	4.78428	-2.63616	2.74244	4.39755	4.13199	4.59862	4.85929	3.47375	-0.327108	0.966689	2.24808	4.97134	-2.2847	2.68688	4.56318	1.91747	5.68347	1.00577	4.06722	3.82552	5.11123	1.78483	-4.94077	3.14374	-0.939226	2.00298	-4.31044	5.60672	3.09793	-0.168317	3.90416	-1.40707	4.84702	4.36177	2.53763	3.48626	6.54897	0.620312	2.37228
TCGA-55-8208	-0.638759	3.93762	2.89861	5.42608	4.05851	7.62547	3.59237	4.30002	1.56021	3.38068	5.18723	-2.86603	3.05883	2.89294	3.67999	4.5315	2.90996	3.03888	-0.876708	0.127984	2.46176	4.63318	-1.80474	2.69638	4.44841	2.08551	5.92135	1.45976	3.62998	2.045	4.86699	-0.132985	-5.96306	2.63166	-1.31779	1.18723	-5.05127	5.64693	3.28511	-0.22799	3.96014	-2.00469	4.92553	2.15295	2.85488	3.551	6.81905	0.106337	0.409124
TCGA-86-6851	-0.656268	4.39247	2.85009	5.3636	4.89647	7.67528	3.34175	4.44447	1.50141	2.83938	5.04389	-2.83904	3.12026	3.40835	4.19382	4.98031	2.84116	2.91582	-0.547042	1.07058	2.08787	4.74008	-1.74979	2.60961	4.46498	2.72251	5.81099	1.10538	3.85465	2.47123	5.05706	-0.279159	-5.01131	2.75594	-1.14457	2.29843	-4.02006	5.59516	3.89615	-0.0466889	4.10847	-1.93049	4.83824	2.75543	3.61019	3.61317	7.02761	1.09032	2.18759
TCGA-83-5908	-0.916186	3.77539	2.59434	5.43313	4.20414	7.60254	3.65406	4.29731	1.44698	3.44494	5.06403	-3.32105	3.70455	2.71714	4.15947	4.97835	2.98727	3.45695	0.0694643	1.4002	2.02346	4.68091	-2.29252	2.66919	4.45993	1.92828	5.79858	1.24699	3.68229	2.4118	5.05	0.355843	-5.37213	3.00101	-1.30368	1.96661	-4.41506	5.85962	2.97313	-0.0507117	3.99428	-1.8735	5.17464	2.57994	2.81089	3.65323	6.67004	0.800138	1.04248
TCGA-64-5815	-0.775741	3.07348	3.29148	5.59831	4.36811	8.10647	3.55944	4.25837	1.28335	2.78382	5.9048	-3.47025	3.49095	1.82309	3.05693	4.81994	2.16787	3.317	-1.03613	-0.181979	2.4138	4.18209	-1.80655	2.6613	4.37975	2.33682	5.98802	1.124	3.39921	1.66958	4.86755	-0.9922	-6.03578	2.97309	-1.50798	1.63536	-3.45602	5.70892	3.37325	-0.224147	4.19985	-1.97509	4.0427	1.68978	3.3226	3.35375	6.5683	0.456923	-0.197224
TCGA-MP-A4T9	-0.409247	4.17033	2.58393	5.4729	4.19032	8.04598	3.56987	4.21635	1.59341	3.14393	5.50468	-2.76479	3.54012	3.49953	3.85317	4.95489	2.67736	3.3508	0.0956363	0.925008	3.11888	4.56746	-1.38881	2.49855	4.44392	2.83057	5.89331	2.61417	4.08549	2.86015	4.97665	1.1219	-4.62377	2.76525	-1.39219	2.14066	-3.50549	5.54806	3.07123	-0.0834188	4.3762	-1.63889	4.68193	2.47453	3.7064	3.64927	6.82888	1.25236	2.11201
TCGA-62-A46S	-0.399528	4.26338	3.44573	5.49132	4.64537	9.18079	3.08773	4.37806	1.95461	3.03528	5.66549	-2.36923	3.58126	2.46362	3.94879	5.41651	3.01911	3.65968	0.401657	0.536344	2.89222	5.04441	-1.12243	2.31931	4.41551	3.20065	5.8554	2.01531	3.94749	2.59388	4.85677	1.31938	-4.70274	3.75093	-1.21283	3.40048	-2.47604	5.58127	3.52672	0.0150577	4.91131	-1.2033	4.68006	2.81191	4.94535	3.84689	7.20215	1.33486	3.29515
TCGA-MN-A4N5	-0.71483	4.19117	2.96086	5.3777	4.37708	8.23688	3.7627	4.44928	2.00601	3.04217	5.34843	-2.74492	3.61776	3.04144	4.45718	5.02659	1.90257	3.63568	0.143742	1.22606	2.66451	4.87391	-1.75233	1.88507	4.45463	2.53804	5.76781	0.706532	4.18703	2.96164	5.07255	1.07599	-4.85423	2.33557	-1.30673	2.66715	-3.46854	5.65927	3.18256	0.0163864	4.07709	-1.83438	4.67734	2.28098	4.39842	3.57073	6.61232	1.24275	2.17968
TCGA-38-4627	-0.705826	1.80316	3.31619	5.62161	3.21351	8.33822	3.44418	3.8044	0.698645	2.82727	5.79384	-3.61978	3.29623	1.40665	2.12046	4.38723	2.9658	2.28442	-0.868558	-0.624529	2.56485	4.0521	-1.69281	3.18752	4.38709	2.61449	6.17222	1.62485	2.90723	1.03391	4.80122	-0.379398	-7.27729	3.64862	-1.51816	0.848381	-4.7356	5.39565	3.50427	-0.375325	4.0605	-2.02194	4.16517	2.1221	2.75904	3.43652	6.31721	-0.183469	-2.51615
TCGA-55-8510	-0.592877	3.62271	2.90876	5.39919	4.33526	7.91805	3.15754	4.27188	1.36173	2.91428	5.35923	-2.53857	3.5811	2.92123	3.65497	5.08198	2.5565	3.13445	-0.246463	0.708922	2.95721	4.60767	-1.65857	2.29951	4.44879	2.77828	5.92404	2.43384	3.70808	2.0711	5.15124	0.726175	-5.75704	2.93618	-1.33524	2.08035	-3.29941	5.54318	3.34238	-0.0765692	3.9133	-1.86936	4.83765	2.26631	3.77605	3.59098	6.67413	0.780616	0.273167
TCGA-55-A492	-0.676204	2.86821	3.87807	5.51605	4.3494	8.98314	3.47855	4.06659	2.15947	2.62863	5.50887	-2.42236	3.94221	2.84044	3.26941	5.34476	3.0161	4.24053	1.23473	-0.23462	3.24445	4.53162	-1.32978	1.41898	4.42046	3.07014	5.86232	3.19713	3.30614	1.77701	4.9899	1.84714	-6.26032	3.1798	-1.51704	3.58332	-3.26103	5.50796	2.31322	-0.0145663	3.91157	-1.47924	4.72404	3.27705	4.04282	3.70547	6.63304	1.15312	0.88384
TCGA-55-8514	-0.327157	4.41865	3.47697	5.36698	4.72539	8.5667	3.53948	4.22946	2.68059	3.41936	5.29825	-1.66274	3.93915	3.85692	5.2694	4.99538	2.25742	3.46751	1.53825	1.0801	4.07747	5.00073	-1.20458	1.72248	4.44597	2.95824	5.89901	4.39284	4.39841	3.34027	5.11833	4.17846	-5.42956	3.01036	-1.36848	3.63995	-3.03839	5.61796	2.92309	0.0558765	4.19381	-1.5248	4.91029	2.84796	4.28384	3.82671	6.70409	1.91279	2.70061
TCGA-69-7974	-0.57448	3.81619	2.52757	5.44654	4.51917	8.19304	3.67748	4.32146	1.79313	3.46044	5.35755	-2.5795	3.46294	3.61038	4.03472	5.0241	2.18253	3.60966	-0.00197923	0.275956	2.56846	4.6525	-1.6363	1.86124	4.43674	2.86666	5.88226	1.15299	3.7449	2.42654	4.90605	1.21781	-5.01828	2.67622	-1.18948	2.05517	-3.76658	5.76686	3.32277	-0.0647428	4.46256	-1.60331	4.53754	2.15278	3.67064	3.45422	7.01384	0.633151	1.11864
TCGA-NJ-A4YI	-0.776554	3.87731	2.99203	5.42456	4.54735	8.92435	3.30081	4.23052	1.54851	2.71932	5.46725	-2.70335	3.63789	2.61976	4.01763	5.28205	2.1498	4.06081	0.200511	0.719808	2.73687	4.64093	-1.51785	2.28528	4.43405	2.98587	5.86851	1.98535	4.03244	2.63697	5.17133	0.757732	-6.03417	3.06725	-1.26148	3.06454	-3.22823	5.44315	3.17273	-0.00993539	4.22804	-1.67778	4.63409	2.59957	3.72514	3.70802	6.23971	0.844722	0.815756
TCGA-55-7227	-0.554012	3.52888	3.3631	5.48111	4.07472	7.82983	3.50184	4.26471	1.48931	2.67832	5.45794	-3.29017	3.50255	2.31143	3.63631	4.68238	2.07764	3.25404	-0.477705	0.27001	2.10962	4.64926	-1.58399	2.07407	4.41441	2.57036	5.96192	0.999729	3.61919	2.11503	4.85784	-0.0817401	-5.38517	2.95932	-1.34275	1.90357	-4.14721	5.5922	3.24963	-0.12158	4.40675	-1.63615	4.25126	2.08836	3.41089	3.64797	6.46938	0.382075	0.885357
TCGA-55-8299	-0.580609	3.21011	3.39535	5.49174	3.53488	7.91746	3.73295	4.22489	1.62801	3.17117	5.30116	-2.97969	2.97965	2.08212	3.31045	4.31718	2.73216	2.83971	-0.613545	-0.0406753	2.08645	4.48972	-1.68835	2.64417	4.42512	2.04291	5.99189	1.32782	3.29162	1.86924	4.82426	0.404188	-5.99255	2.69007	-1.4225	1.14043	-4.91741	5.58973	2.99685	-0.263921	4.01628	-1.88992	4.36068	1.97707	3.05478	3.48078	6.47349	-0.103053	0.347539
TCGA-MP-A4T4	-0.612477	4.10653	3.06391	5.37853	4.29853	7.68333	3.57964	4.23788	1.40337	2.94842	5.35025	-2.92287	3.53425	2.52696	4.01107	4.89041	2.46938	3.04323	-0.728127	1.28799	2.35466	4.5917	-1.90622	2.5272	4.4417	2.45667	5.82461	1.53041	3.75528	2.29965	5.00372	0.267391	-5.37401	2.69049	-1.31506	1.97157	-3.68546	5.73912	3.31375	-0.120427	3.98709	-1.87003	4.56626	2.1855	3.61451	3.47478	6.78781	0.779747	1.39872
TCGA-91-7771	-0.435483	3.63219	2.8189	5.48064	4.03817	8.172	3.40844	4.37505	1.59843	3.16973	5.39994	-2.69759	3.22681	2.7149	3.57668	4.88051	3.05405	3.46248	-0.104174	0.156529	2.23038	4.85505	-1.23786	2.23106	4.42333	2.95263	5.93315	1.16096	3.60284	2.23153	4.74162	0.425529	-4.72368	3.00578	-1.0947	1.82726	-3.85259	5.55655	4.04893	-0.0991969	4.60394	-1.34794	4.72259	2.16238	3.56642	3.75379	6.95198	0.596924	1.77042
TCGA-67-3771	-0.6618	4.11633	2.75365	5.39033	4.23468	7.56344	3.79204	4.16663	1.70867	4.04132	5.17916	-1.92552	3.3498	3.98783	3.74466	5.08166	4.15758	3.85057	0.126622	0.541855	3.43487	5.21113	-1.53845	2.58525	4.48242	2.8361	5.7682	2.70936	4.03672	2.78045	4.87557	1.5777	-4.26257	2.77449	-1.07005	2.28799	-3.82515	5.45046	3.57898	-0.0277777	4.01193	-1.57865	4.89236	2.98917	2.99142	3.87726	6.78409	1.19346	2.03625
TCGA-78-8640	-0.911355	4.25625	3.08137	5.40388	4.67401	7.99612	3.27799	4.31811	2.31334	3.27093	5.19642	-2.20324	3.53865	3.89893	4.31118	5.46286	4.00856	4.31481	-0.134853	0.928543	3.14494	4.59418	-2.10153	2.66441	4.48671	2.76638	5.71546	1.69173	4.18713	3.13894	5.26306	2.34079	-5.23543	3.34809	-1.16635	3.17908	-3.42678	5.81349	2.98779	0.0485994	4.20043	-1.48645	5.15833	3.35987	2.83043	3.80809	6.81824	0.802727	1.96171
TCGA-55-7907	-0.628932	3.52529	2.50182	5.43804	4.46811	8.30236	3.4505	4.32384	1.43328	3.38014	5.2661	-2.37524	3.45589	3.8143	2.9591	5.16214	3.08506	3.79975	-0.22744	0.457619	3.00027	4.84883	-1.66143	1.27357	4.44981	3.03167	5.9079	1.1868	3.85316	2.49753	4.90414	1.25996	-4.21975	2.11719	-1.13397	2.15866	-3.49459	5.57614	3.34571	-0.0159074	4.27308	-1.37463	4.79665	2.64832	3.23203	3.58789	6.97444	0.951167	0.959959
TCGA-44-A47G	-0.54238	4.0538	3.46244	5.41517	3.99948	7.74914	3.29912	4.48805	1.43601	3.15498	5.3222	-3.03055	3.35037	2.64494	3.85927	4.51272	1.97983	2.94845	-0.669298	0.364739	2.34703	4.68927	-1.65308	2.07751	4.42913	2.30209	5.89844	0.777755	3.73048	2.14549	4.8626	-0.165224	-5.50989	2.40976	-1.34954	1.65219	-4.12855	5.67825	3.17157	-0.164269	4.06146	-1.86292	4.68072	1.95997	3.53388	3.61183	6.85559	0.274274	0.755011
TCGA-55-8616	-0.707504	3.45281	2.85428	5.39462	4.55875	7.9794	3.14743	4.11662	1.67084	3.02217	5.0563	-2.83276	3.69821	3.81081	3.60351	4.94414	2.88968	2.84294	0.759859	0.500344	2.92827	4.84159	-1.78003	1.11829	4.45505	2.82511	5.76344	1.53521	3.87241	2.75152	5.09056	1.75871	-4.68286	2.58382	-1.23233	2.78776	-3.22877	5.68582	3.27502	0.0419465	3.80338	-1.60639	4.8339	2.96829	3.76715	3.57796	6.62284	1.52652	0.834629
TCGA-95-7947	-0.915491	4.37724	2.72765	5.44257	5.09841	7.86718	2.33898	4.40728	2.48983	3.29227	5.06381	-2.41164	3.8851	4.04837	4.33282	5.48684	4.3956	2.62329	0.754125	0.939551	2.86409	5.00986	-1.85505	1.44475	4.48473	2.5879	5.85866	2.41841	4.28869	3.28689	5.15027	1.50543	-5.213	3.24704	-1.13741	3.74551	-3.02704	5.45895	3.58593	0.179635	4.19636	-1.55678	5.084	3.44285	3.47118	3.86539	6.62856	2.24529	3.3764
TCGA-05-4390	-0.625894	3.96483	2.73625	5.45892	4.31385	8.47245	3.54123	4.12303	1.74424	3.26529	5.46279	-2.73437	3.59692	3.7204	4.5233	5.11665	4.01144	3.51466	0.0147306	0.363394	2.14882	5.15433	-0.962141	2.80791	4.47748	2.37236	5.89227	1.57729	4.0118	3.06027	4.79213	0.959206	-4.12872	3.58589	-1.12137	2.5947	-3.98181	5.69756	2.75095	-0.0451418	4.55793	-1.40563	5.37224	3.47626	3.36427	3.94168	7.08071	0.461913	3.40536
TCGA-L9-A443	-0.486483	3.85012	2.93304	5.41149	3.66611	9.05265	3.583	4.33887	1.71888	3.07929	5.32948	-2.83275	3.43319	3.74369	3.8321	4.65111	3.26349	3.5422	0.421767	0.184635	2.92263	4.90265	-1.16811	1.57309	4.44969	2.56239	5.80075	1.02586	4.06474	3.04528	4.97408	0.76999	-5.22429	2.72937	-1.24432	1.67214	-3.99146	5.40493	3.28311	-0.0963901	4.53955	-1.22071	4.70606	2.74542	3.72436	3.7519	6.61095	0.503977	0.979939
TCGA-50-5941	-0.894207	3.44931	3.01789	5.45366	4.4364	7.54853	3.43276	4.42234	1.94965	3.13125	5.25208	-2.9913	3.51155	2.94365	3.92808	5.00829	2.74305	3.23624	-0.608124	0.255144	2.47141	4.58517	-1.81232	2.32472	4.43133	2.44955	5.98548	1.091	3.60133	2.19908	4.94754	0.628743	-5.54881	2.83039	-1.24523	1.88868	-4.40228	5.76374	3.53361	-0.108952	3.80178	-1.90021	4.67997	2.30655	3.08822	3.43417	6.81048	0.647742	0.914097
TCGA-78-7537	-0.79001	3.23586	3.38614	5.50385	4.57451	9.08578	3.28902	4.1745	1.64739	2.34423	5.71025	-2.88685	3.45075	2.51748	3.49513	5.27713	3.2249	3.68864	-0.159085	0.101394	2.29334	4.43311	-1.59679	1.92542	4.4032	3.04364	5.88564	1.97904	3.41307	1.93199	5.05478	1.3135	-5.87619	3.09611	-1.32522	2.87484	-3.25482	5.44333	2.97788	-0.0421576	4.10298	-1.73851	4.24081	2.81035	3.91912	3.73117	6.31588	0.85889	0.91971
TCGA-44-3917	-0.230552	4.34313	2.80083	5.41546	2.62399	8.05191	3.41152	4.31001	2.11379	4.6758	5.04342	-2.59701	3.34465	4.30789	4.42145	4.60972	3.62003	3.86401	0.269976	0.793668	2.48378	5.21423	-0.818071	2.54956	4.53214	2.58278	5.9832	0.828809	4.1049	3.81927	4.56132	2.19575	-3.42827	2.93744	-0.829216	1.43966	-5.13447	5.4369	3.01998	-0.140564	4.74056	-0.662614	5.7791	2.93564	2.26139	4.03514	6.719	0.569461	3.47021
TCGA-95-A4VN	-0.749102	4.31327	3.23403	5.43279	4.1995	7.81627	3.56941	4.52289	1.85636	3.37659	5.28907	-2.90225	3.55601	2.3247	4.51498	4.71988	2.07044	3.49262	-0.26244	0.436973	2.35173	4.71164	-1.7727	2.1073	4.44771	1.90068	5.88261	0.691276	3.95279	2.68865	4.93387	0.520179	-5.62404	2.45506	-1.29855	1.79638	-4.3109	5.81404	2.93252	-0.132505	4.08798	-1.72613	4.41387	1.77482	3.56179	3.51562	6.75626	0.264401	2.10231
TCGA-05-4420	-0.863037	3.59842	2.92003	5.4714	4.22944	8.75659	3.68734	4.21299	2.07354	3.24839	5.52852	-2.8361	3.76363	3.56626	4.84009	5.04832	3.96088	3.50766	0.195124	0.289328	2.38398	4.85466	-1.70211	2.63126	4.48155	2.04182	5.87324	0.72707	3.52303	2.73375	4.85607	1.16461	-5.29738	3.48302	-1.12573	2.62815	-3.69753	5.69181	2.8703	-0.0547867	3.87927	-1.8048	5.32464	3.29768	4.01048	3.73035	6.75703	0.881497	3.04876
TCGA-50-5932	-0.753728	3.19377	3.21736	5.5171	4.85789	8.58473	3.19966	4.51297	1.80093	2.77719	5.56797	-2.6043	3.64216	4.16923	3.54431	5.62902	3.62797	3.9567	0.737952	0.336494	2.4435	4.69273	-1.37515	1.67077	4.41824	3.82954	5.86391	1.90811	3.67082	2.53555	5.06441	1.2988	-3.92179	3.02347	-1.0974	3.92627	-2.89221	5.51967	3.47506	0.0890913	4.47081	-1.20043	4.46583	3.50648	3.6466	3.90243	6.63415	1.22562	2.24201
TCGA-95-8039	-0.709088	3.49176	3.35002	5.48583	4.14961	8.1564	3.02246	4.43339	1.68609	2.69476	5.61453	-2.94398	3.68177	3.43372	3.58275	4.99429	2.43159	3.38154	-0.180003	0.517887	2.62512	4.47488	-1.78527	2.11538	4.42544	2.55692	5.92544	1.70429	3.81281	2.43079	4.9288	0.712887	-5.32386	2.87803	-1.37576	2.09624	-3.57801	5.59121	3.48673	-0.0954503	4.16136	-1.77684	4.67268	2.39737	3.86127	3.55563	6.71751	0.708314	0.609886
TCGA-55-7903	-0.784538	4.23539	2.85708	5.41814	4.50213	8.31706	3.41682	4.38515	2.00683	3.28202	5.29719	-2.77767	3.60678	3.87034	4.6248	5.15345	2.49398	3.7028	-0.0119322	0.741046	2.61163	5.0059	-1.73497	2.04992	4.4546	2.63326	5.76027	0.69765	4.16578	3.38801	5.10676	0.99172	-4.63232	3.06498	-1.17154	2.60002	-4.05301	5.82694	3.0323	-0.0160749	4.25222	-1.5131	4.87755	2.44114	3.72275	3.57104	6.63305	0.840517	2.40149
TCGA-MP-A4SV	-0.636153	4.34309	2.7652	5.3781	4.23526	7.57371	3.49122	4.34456	1.70208	3.168	4.99973	-2.68933	3.41314	3.50214	4.50955	5.052	2.93504	3.36121	-0.203677	1.04679	2.21376	4.97002	-1.67087	2.48578	4.47916	2.37295	5.75162	1.19017	3.98091	3.00489	4.9763	0.829971	-4.76579	2.75743	-1.1014	2.33586	-4.36139	5.6689	3.27744	-0.0320288	4.20127	-1.52976	4.80935	2.55713	3.19634	3.68701	6.59456	0.546917	2.64821
TCGA-55-6980	-0.555651	2.96348	3.16343	5.52012	4.20691	7.96466	3.38442	4.12368	1.35733	2.85845	5.62538	-3.37453	3.70283	2.67753	3.34205	5.03101	2.66052	2.58899	-0.198362	0.488229	3.4326	4.38266	-1.63469	2.78232	4.38724	2.7895	6.03832	2.7757	3.6273	1.83079	4.99479	0.139532	-6.00146	3.51604	-1.5588	1.57665	-2.87047	5.54588	3.36042	-0.123134	4.11582	-1.88992	4.75983	2.31573	3.84821	3.54054	6.63897	1.15102	-0.343397
TCGA-99-8025	-0.678632	3.35711	2.79589	5.44505	4.02501	8.75869	3.24701	4.22116	1.92131	3.15607	5.52528	-2.69145	3.61224	3.65238	3.51422	4.85739	3.05073	3.21514	0.163969	0.198759	3.04678	4.79034	-1.71349	1.6899	4.45222	2.57628	5.97442	1.57815	3.85611	2.58664	5.05948	1.461	-5.72541	2.88062	-1.30362	2.01339	-3.44881	5.57543	3.17917	-0.00547543	4.14766	-1.58359	4.23786	3.02971	3.81139	3.59581	6.67026	1.19841	0.442347
TCGA-L9-A444	-0.560072	4.32235	3.52816	5.35363	4.4218	8.09449	3.54339	4.37327	1.83448	2.85498	5.13663	-2.8344	3.29614	3.12882	4.37137	4.65109	2.46256	3.22407	-0.297782	0.879906	2.52467	4.74699	-1.56075	2.2387	4.45285	2.54209	5.81234	1.60503	3.7873	2.4968	5.04106	0.293893	-5.6065	2.58749	-1.23039	1.99996	-3.8664	5.62723	3.52193	-0.114245	3.9778	-1.96664	5.29047	2.36607	3.91194	3.57007	6.96178	0.794162	1.76998
TCGA-55-7995	-0.875596	4.33186	2.72158	5.36345	4.87978	7.39211	3.23282	4.36392	1.87769	3.83693	5.08912	-2.02976	3.40116	4.15596	3.99383	5.51362	4.38326	2.98748	0.00308107	1.20169	2.73694	4.95922	-2.02353	2.4049	4.49079	2.54237	5.83344	3.12241	4.21925	2.79727	5.15478	0.684102	-5.50865	3.26725	-1.16285	3.30566	-3.79351	5.5223	3.7274	0.0558565	4.25851	-1.88615	5.17628	3.57623	3.21345	3.70518	6.93669	1.31456	2.12926
TCGA-73-4658	-0.781735	2.93321	3.40108	5.59803	3.95766	7.98999	3.20835	4.28407	1.2479	2.90857	5.72705	-3.5061	3.70831	1.80915	3.51245	4.75596	2.31078	2.92623	-0.410225	-0.213801	2.18657	4.34902	-1.58241	2.70889	4.38904	2.55128	6.06961	1.21533	3.27534	1.80021	4.78939	-0.117771	-6.3686	3.37571	-1.43691	1.41061	-3.58953	5.63058	3.05031	-0.236418	4.02085	-1.88387	4.51264	1.84825	3.37627	3.54676	6.45907	0.403855	-0.67752
TCGA-49-AAR4	-0.588157	4.19138	2.8587	5.34197	3.93264	7.72534	3.76455	4.2452	1.50551	3.60686	5.15017	-2.78299	3.56495	3.3904	4.29255	4.59265	2.04364	3.23555	-0.111042	0.994431	2.84458	4.88127	-1.86998	1.99601	4.47622	2.23549	5.82442	2.42885	3.87053	2.35997	4.9986	0.498436	-5.10537	2.42759	-1.36533	1.93069	-4.42874	5.58365	2.97668	-0.0651278	4.01349	-1.95523	5.08971	2.26593	3.70017	3.62028	6.98948	0.866389	1.24638
TCGA-78-8648	-0.417397	3.32104	3.31249	5.48583	3.59246	8.07971	3.66347	4.0749	0.818288	2.81478	5.35499	-3.24027	2.67475	1.13501	3.28632	4.34732	2.5084	2.48245	-1.48551	-0.178515	2.1658	4.14275	-1.62446	3.43702	4.42531	2.23015	5.98369	1.54044	3.22908	1.5142	4.94416	-0.870784	-6.68298	3.11108	-1.46684	0.746754	-4.82125	5.4911	3.3721	-0.411407	3.89928	-2.18178	4.4052	1.97138	3.06264	3.38429	6.61644	-0.326526	-0.471632
TCGA-L9-A7SV	-0.503234	4.5296	2.9851	5.3424	4.33921	8.15185	3.68871	4.31092	1.86849	3.13692	5.0735	-2.13437	3.28261	4.81606	4.1468	5.24905	4.06859	3.99236	1.12315	1.07102	2.78275	5.09988	-1.51773	2.12136	4.51832	2.53891	5.54463	2.6495	4.35537	3.84227	5.28486	2.07007	-3.83685	2.34878	-1.01852	2.97048	-3.0428	5.60268	2.9945	0.0103953	4.43309	-1.06484	5.12204	3.80496	3.91529	3.67342	6.51554	1.275	2.70554
TCGA-49-4512	-0.688366	3.00028	3.2326	5.48519	4.16017	8.92209	3.5232	3.97986	1.43438	2.63045	5.59537	-3.27761	3.76293	2.24834	3.83707	4.85338	2.5304	2.84099	0.34555	0.565867	2.80155	4.77465	-1.52333	2.41031	4.4226	2.83195	5.98432	2.5432	3.56092	2.01336	5.06477	0.800715	-6.2726	3.522	-1.5272	2.67753	-3.41404	5.49454	3.27714	-0.103456	3.96884	-1.89139	4.85043	2.37412	4.02151	3.34436	6.62759	1.20987	0.188632
TCGA-05-4402	-0.816446	3.39415	3.15872	5.43978	4.14333	7.81853	3.09423	4.32385	1.71636	3.3417	5.30549	-2.75594	3.60633	4.36925	3.95771	4.94125	3.57481	2.99004	0.0108372	0.455197	3.13167	4.64274	-1.46536	1.90228	4.43351	2.79411	6.04	1.81675	3.9911	2.71619	5.03482	1.94554	-5.01821	2.69428	-1.21936	2.02129	-4.14647	5.48518	3.38674	-0.0312821	4.23888	-1.56393	5.00841	3.17775	3.09555	3.7642	6.91601	0.782702	0.936085
TCGA-05-4405	-0.594729	3.74028	3.01618	5.50972	4.06758	8.38818	3.23275	4.40104	1.72251	2.99294	5.48848	-2.84115	3.46423	3.08294	3.62804	4.91789	2.60065	3.09301	-0.299225	0.330887	2.63507	4.60004	-1.49307	2.1165	4.43647	2.96471	6.08071	1.64675	4.02248	2.828	5.04101	1.51843	-5.24033	2.67701	-1.2777	1.54536	-3.74131	5.47883	3.28599	-0.111874	4.08485	-1.5731	4.48307	2.25211	3.50239	3.62451	6.51944	1.05856	0.6921
TCGA-97-7546	-0.343833	3.87463	2.54946	5.49338	4.04873	7.78312	3.14143	4.21989	1.40625	2.74779	5.05991	-2.96138	3.26887	4.52019	3.49195	4.99259	3.95226	3.15208	0.0416891	0.224742	2.53835	4.59907	-0.959438	2.35829	4.44057	2.75359	5.91258	1.6822	3.98656	2.9941	4.8838	1.05663	-4.75011	2.83386	-1.1072	1.57235	-4.0497	5.36968	3.70629	-0.151993	4.516	-1.41874	4.30134	3.03159	2.97912	3.77314	6.59554	0.784551	1.2997
TCGA-86-7714	-0.607974	3.56382	3.12258	5.46862	4.31722	8.04786	2.76579	4.35188	1.42387	2.33933	5.32212	-3.06719	3.44329	3.63928	3.90734	4.83741	2.20759	2.82015	0.097733	0.486307	1.7733	4.61786	-1.452	1.44356	4.41249	3.08056	5.9362	0.52906	3.83439	2.6754	4.845	0.660931	-4.91464	2.41969	-1.18669	2.61651	-4.38852	5.55754	3.22595	-0.0460648	4.63133	-1.2436	4.33202	2.22387	3.09466	3.69741	6.52763	0.604874	1.43191
TCGA-62-A46R	-0.492512	4.36391	3.21703	5.43445	4.52844	8.03183	3.18617	4.43447	1.95783	3.55621	5.32917	-2.52489	3.85222	3.49724	4.54777	4.96494	2.51351	2.78967	0.610512	1.17038	2.82024	5.07392	-1.33017	1.67398	4.45078	3.3448	5.88967	1.12875	3.90785	2.95825	4.96357	1.49994	-4.72185	2.72763	-1.26644	2.98341	-3.35321	5.61043	3.08799	-0.0170637	4.37049	-1.29149	5.06376	2.44663	3.88695	3.66549	6.87585	1.19924	2.74626
TCGA-50-5931	-0.752872	3.36114	1.50674	5.41624	2.99875	7.73554	4.10943	3.74137	1.54303	3.82232	4.78411	-2.57576	2.64366	2.99179	2.6893	4.60954	4.52685	3.33368	-1.05104	-0.174642	2.55342	4.96606	-2.13611	2.31211	4.54238	1.07266	5.65186	1.63537	4.051	3.70741	5.0033	2.25385	-5.52072	2.13056	-0.988632	1.57315	-5.87258	5.47568	2.74877	-0.267307	3.63631	-1.40491	4.98249	3.70707	2.31026	3.69104	5.98515	-0.0275842	1.66215
TCGA-78-7163	-0.778591	3.71072	3.42963	5.49887	5.10142	8.55173	3.08248	4.14848	2.51648	2.99721	5.83727	-3.10702	3.85457	4.27226	4.95002	5.31852	2.95143	3.03615	2.0944	0.460066	2.83911	4.9095	-1.04258	1.71523	4.39442	3.4512	6.011	3.40054	3.98957	2.50261	5.03292	1.79026	-6.04562	3.53889	-1.31249	5.77308	-2.55437	5.39333	3.42963	0.206445	4.88418	-1.64406	5.0904	3.2819	4.5682	3.91638	7.20198	2.06984	3.08656
TCGA-55-7724	-0.729827	3.62739	2.39605	5.61038	3.87772	7.32178	3.19256	4.41231	1.3255	4.16002	5.21193	-3.00472	3.58787	4.19675	2.71096	5.02921	3.79353	2.69402	0.1727	0.513786	2.25639	4.64306	-1.4042	1.80627	4.43346	2.71635	6.06376	1.37968	3.67442	2.60645	4.57866	0.758072	-4.45937	2.32479	-1.11158	1.40119	-4.34541	5.31156	3.24683	-0.150099	4.15954	-1.32309	4.88278	2.50767	2.38718	3.69854	6.74016	1.32279	1.03163
TCGA-86-A4JF	-0.932915	3.90718	3.10194	5.46925	4.45163	8.05868	3.40025	4.49854	2.42198	3.03312	5.24892	-2.74735	3.93369	2.91158	4.2583	5.40161	3.0899	3.9116	-0.120791	0.743699	2.7442	4.73242	-1.58642	2.39788	4.44592	2.38152	5.94986	1.64381	4.01737	2.91405	4.96189	1.87386	-5.92411	3.3651	-1.24443	3.13172	-3.96732	5.67152	2.89497	-0.0152082	4.08808	-1.73117	4.94686	2.66931	2.97576	3.79488	6.38651	0.756601	1.91083
TCGA-L9-A743	-0.461303	3.99292	3.07686	5.4276	3.92354	8.01509	3.37887	4.31258	1.67492	3.43225	5.31266	-2.90783	3.27097	3.02856	3.71597	4.69168	2.34858	2.89539	-0.422326	0.354651	2.49773	4.74467	-1.54735	2.38779	4.44746	2.23381	5.91692	1.6498	3.78608	2.26314	4.81934	0.278782	-5.44833	2.56579	-1.35212	1.3512	-4.26755	5.63557	3.38258	-0.173966	4.1175	-1.81083	4.7355	2.06931	3.71498	3.59212	6.91913	0.339751	0.694394
TCGA-MP-A4T6	-0.386156	4.60013	3.05211	5.24426	4.43685	8.7113	3.92834	4.07894	1.89106	3.09216	5.09719	-2.23426	3.7296	3.53969	4.92875	5.06748	2.36806	3.75483	1.18416	1.28846	3.00511	5.01489	-1.22243	2.1258	4.46452	3.36095	5.77621	3.8157	4.41529	3.07986	5.22487	1.66173	-4.69081	2.65112	-1.29772	3.50656	-2.77761	5.33615	3.04447	0.0861999	4.76596	-1.36046	5.28381	2.95114	3.95559	4.06053	6.91623	1.99778	2.74336
TCGA-55-7725	-0.549988	4.19058	3.19385	5.50905	4.1781	8.00078	3.31253	4.5721	1.97191	2.92608	4.93371	-3.16758	3.2315	3.42481	4.33077	4.60489	2.86622	3.49898	0.492022	0.675198	1.5358	5.05464	-1.35786	1.40003	4.42856	2.95607	5.86986	-0.574181	3.68318	3.00385	4.65831	0.359794	-4.44237	2.60962	-1.04623	2.11314	-4.79505	5.60616	3.07821	-0.106333	4.47479	-0.811015	4.86862	2.14469	2.7208	3.89419	6.38887	0.464931	2.72773
TCGA-67-6216	-0.802519	3.67414	3.51574	5.45023	4.28422	7.94805	3.03214	4.33759	1.75608	2.28503	5.33098	-3.43368	3.6058	2.74421	4.03736	4.83262	1.6865	3.34387	-0.0468514	0.617193	1.80862	4.55623	-1.79436	1.55213	4.40078	2.83475	5.91176	0.727037	3.59602	2.06671	4.92965	0.0482726	-5.75674	2.71063	-1.41209	2.69918	-4.18608	5.68155	2.90478	-0.0345072	4.36747	-1.71584	4.43419	1.97288	3.35125	3.62724	6.54652	0.605049	1.31053
TCGA-NJ-A4YG	-0.604199	3.60952	3.7083	5.45144	4.32194	8.18251	3.51474	4.45185	1.77463	2.20022	5.37759	-3.0191	3.43557	1.34624	3.67792	4.71755	1.93907	3.9651	-0.0406261	-0.1624	2.22598	4.74091	-1.60117	1.75099	4.41924	2.36743	5.88919	0.812724	3.71818	2.22484	4.96955	0.431894	-6.26115	2.88571	-1.27446	2.3565	-3.89254	5.65949	3.10704	-0.0997837	4.32647	-1.40462	4.46066	2.11316	3.65536	3.72766	6.33463	0.473295	1.04489
TCGA-49-6745	-0.787218	3.23742	2.76137	5.55074	4.21225	7.458	3.55276	4.53646	1.63097	3.20664	5.4973	-3.41458	3.83477	2.7213	3.95907	4.86421	2.00176	3.63679	-0.444817	0.648006	2.11708	4.38891	-1.94689	1.92403	4.41872	2.50661	6.00287	0.595661	3.48287	2.14941	4.77622	0.255667	-5.24456	2.45529	-1.26226	1.8818	-4.45375	5.78041	3.34182	-0.128442	4.31208	-1.57344	4.46567	1.70027	2.99855	3.38591	6.63955	0.133862	1.1153
TCGA-55-6983	-0.599229	3.77449	2.85268	5.45801	3.77249	8.43713	3.51422	4.28441	1.91862	3.10682	5.44505	-3.07377	3.33778	2.99039	3.53713	4.81115	3.007	3.68124	-0.18143	-0.156405	2.38776	4.76509	-1.48608	2.55628	4.45199	2.67801	5.98097	1.88414	3.64519	2.20497	4.83706	-0.0865015	-5.23717	3.42521	-1.25824	1.71702	-4.26363	5.42539	3.06025	-0.101606	4.40705	-1.55947	4.98158	2.61589	3.57856	3.91964	6.72079	0.418096	1.3821
TCGA-49-4505	-0.77836	3.25346	3.64016	5.49804	4.09804	8.14639	3.20501	4.25313	1.7489	2.81681	5.59909	-3.34629	3.98042	2.36122	3.97763	4.66283	2.25311	3.0837	-0.179925	-0.0984896	2.80999	4.49943	-1.41432	2.43193	4.38806	2.7296	6.00274	1.26026	3.61585	2.08209	4.92297	0.785278	-5.97142	3.41358	-1.48807	2.16146	-4.188	5.60223	3.56907	-0.13162	4.03521	-1.73652	5.02319	2.13841	3.47335	3.69056	6.81497	0.641402	0.0958339
TCGA-55-A4DG	-0.327298	4.54805	3.0461	5.35924	4.41731	7.92852	2.57001	4.24128	1.55025	2.58123	4.97459	-2.30195	3.45685	4.35784	3.85315	5.36498	3.23854	3.06685	0.422445	1.17748	2.95767	4.96907	-1.20672	1.76818	4.46104	3.53238	5.67296	2.03167	4.22209	3.34646	5.09721	1.68408	-3.97255	2.64344	-1.06112	3.08985	-3.09549	5.50173	3.46855	0.0625075	4.25892	-1.40008	4.9618	3.09865	3.66757	3.80494	6.9177	1.48709	2.31204
TCGA-55-6985	-0.690597	3.53559	2.5946	5.43888	4.05501	7.90649	3.16988	4.25804	1.59051	3.1666	5.25255	-2.94939	3.46799	3.41997	3.52011	4.84028	2.91171	2.84978	-0.440828	0.257794	2.77787	4.7461	-1.59333	2.23255	4.44467	2.43293	6.03766	1.81068	3.98497	2.57127	4.95663	0.513972	-5.09245	2.78251	-1.28322	1.47041	-4.1167	5.486	3.6488	-0.0592251	4.21607	-1.62681	4.7245	2.47521	3.25723	3.72922	6.91021	1.03883	0.525298
TCGA-44-6148	-0.146077	3.95471	2.46897	5.42202	3.44892	8.61239	3.08628	4.00555	1.16614	2.86318	5.02977	-3.04088	2.82766	3.77975	3.69154	4.54903	2.91373	3.01762	0.0285804	0.102637	2.54321	4.60267	-1.18207	2.15982	4.45092	3.10872	5.96445	1.57733	3.86067	2.69794	4.89671	0.343093	-4.72618	2.53088	-1.16862	1.61172	-4.40677	5.22219	3.60893	-0.160102	4.75305	-1.25373	4.38649	2.79208	3.09257	3.73662	6.77977	0.697295	1.49737
TCGA-49-AAQV	-0.528511	4.71029	3.81897	5.41163	4.17579	7.65895	3.29437	4.19557	2.51862	3.70752	5.32913	-2.44417	3.84557	3.86955	5.10521	4.68747	2.74454	3.31391	0.668993	1.10649	3.18538	5.15386	-1.3408	1.99542	4.47034	2.29589	5.80543	3.62664	4.20559	3.04706	4.99677	2.0878	-4.90208	2.938	-1.35403	3.14308	-3.58771	5.65179	2.7727	-0.00983194	4.32161	-1.50134	5.59188	2.62524	3.79859	3.80343	6.95724	1.18018	3.22722
TCGA-97-7547	-0.49617	3.8168	3.47229	5.5505	5.14608	8.51091	2.90857	4.39558	2.14708	2.68276	5.80444	-2.34818	3.74107	2.10421	3.15291	5.55391	2.97228	3.20316	0.273803	0.318403	2.99296	4.81437	-1.31039	1.91228	4.38466	3.67897	5.99997	2.69318	3.94455	2.37708	4.9849	1.50518	-5.09129	3.71525	-1.22011	3.42661	-2.13338	5.59511	4.46505	0.0326797	4.3333	-1.39633	4.40003	2.51213	4.16819	3.90686	6.73462	1.35657	1.04893
TCGA-97-8174	-0.328638	3.51535	3.05834	5.48993	3.77745	8.52429	3.16289	4.04598	1.02346	2.07983	5.37649	-3.05137	2.86333	2.78055	2.87142	4.89163	3.15705	3.11792	-0.461915	-0.238494	2.07549	4.2606	-1.34485	2.80768	4.41934	3.00722	5.88145	1.28667	3.58876	2.38565	4.9328	0.150129	-5.21234	3.33273	-1.27784	1.61256	-3.56362	5.44039	3.312	-0.233672	4.4014	-1.36904	4.04212	2.91646	3.44421	3.68227	6.37158	0.587902	1.07736
TCGA-62-8395	-0.484028	3.42763	2.73491	5.46072	3.96442	9.27605	3.25873	4.05917	1.10652	2.49839	5.58833	-2.90582	3.46042	3.28036	3.34784	5.18871	3.70785	2.98971	0.00799582	0.308465	2.35439	4.4818	-1.40583	2.4025	4.43348	3.02391	5.85503	1.79626	3.90606	2.61388	4.9303	0.999306	-4.68121	2.93486	-1.28212	2.76856	-2.84316	5.39986	3.42261	-0.0630825	4.09542	-1.55071	4.554	3.31382	4.14658	3.60578	6.82154	1.00746	1.2172
TCGA-99-7458	-0.401384	4.18546	2.92228	5.46697	3.98509	7.84539	3.26496	4.30549	1.79858	3.17301	5.3037	-2.99626	3.39664	3.61596	4.01018	4.47711	2.65674	3.26219	-0.230291	0.328483	2.39101	4.73276	-1.15492	2.17369	4.42925	2.95944	5.94282	1.58528	3.874	2.85556	4.89015	0.701821	-4.57252	2.88098	-1.18569	1.54737	-4.09171	5.54464	3.63563	-0.125535	4.3988	-1.32621	4.62073	2.23773	3.17697	3.87012	6.53876	0.537601	1.73132
TCGA-64-1677	-0.977915	3.75179	3.23409	5.45668	4.23454	8.13181	3.58695	4.30239	2.1686	3.07941	5.23161	-3.34069	3.50162	3.56679	4.86091	5.11303	3.02916	3.98967	0.553093	0.284467	2.18168	5.13058	-1.84167	2.08821	4.48862	1.73752	5.84342	0.0638162	3.52579	2.74499	4.78489	1.0907	-5.83817	3.20608	-1.10707	2.45295	-5.39497	5.79185	2.74238	-0.0705288	4.2418	-1.58704	5.55092	2.74646	2.75197	3.63265	6.63721	0.393983	2.67805
TCGA-44-5643	-1.1742	3.99672	2.92828	5.47949	4.27232	7.25644	3.6844	4.47106	1.58461	3.90425	5.04891	-3.38063	3.43616	3.19055	3.87578	5.0186	3.63156	4.07647	-0.989049	0.483426	2.23826	4.81833	-2.76115	1.36434	4.50072	1.1448	5.69	-0.257944	3.8685	2.83154	4.83704	0.672639	-5.50508	0.860204	-0.996776	2.40554	-6.14767	5.65329	2.83059	-0.1441	3.81477	-1.37149	4.87134	2.70845	2.12186	3.28519	6.65528	-0.44826	3.36108
TCGA-67-3773	-0.599466	3.22812	4.00093	5.54407	4.29037	8.60673	3.46067	4.43196	1.91255	2.32997	5.4357	-3.63279	3.69181	2.36185	3.79234	4.99163	2.0959	3.20905	0.3323	0.385459	2.55876	4.66728	-1.4552	2.17353	4.39515	2.70967	6.0593	-0.643092	3.10857	1.59276	4.77641	-0.215033	-6.76981	3.74559	-1.41944	2.7912	-4.2255	5.59371	3.43094	-0.178243	4.36469	-1.42302	4.84995	2.32799	3.30802	3.66277	6.03448	0.48195	0.681472
TCGA-91-6835	-0.473042	4.60845	2.65709	5.40175	4.14728	8.21335	3.7164	4.46293	1.64889	3.96138	5.03069	-2.31117	3.20526	3.70161	4.47279	4.67299	2.99969	3.299	-0.290608	0.703792	2.818	4.88931	-1.49338	2.53899	4.47377	2.57637	5.91982	2.47586	4.23852	3.21836	4.99319	1.14498	-4.24294	2.59884	-1.20726	1.46114	-4.23061	5.55069	3.60709	-0.172362	4.54057	-1.46343	4.94446	2.48389	3.17497	3.668	6.83887	0.865233	1.89777
TCGA-55-A48X	-0.478477	4.14643	2.80389	5.37828	4.20835	7.91488	3.43694	4.34211	1.65574	2.85162	5.16907	-2.64523	3.39079	3.31853	3.92352	5.02024	2.73086	3.09102	0.0135452	0.576938	2.68054	4.77961	-1.38813	2.09524	4.45544	2.63001	5.87932	2.42512	3.99585	2.60392	5.01253	0.523666	-5.02848	2.84705	-1.26109	2.07229	-3.67553	5.4547	3.48673	-0.0660911	4.28214	-1.68556	4.67948	2.62858	3.88527	3.69459	6.71524	1.08884	1.30861
TCGA-55-7574	-0.48412	3.9216	3.06855	5.43705	3.71777	8.00141	3.67224	4.10253	1.20804	2.87284	5.2437	-3.13194	3.01875	2.49088	3.53047	4.74562	2.54868	2.88641	-0.4634	0.257044	2.05441	4.62139	-1.57873	2.94089	4.44453	2.57083	5.8511	1.17864	3.55212	2.21311	4.88347	-0.505894	-5.5123	2.89414	-1.33741	1.38508	-4.19921	5.49184	3.17383	-0.221506	4.12276	-1.90933	4.47875	2.08672	3.40372	3.606	6.79531	0.411709	0.861324
TCGA-86-8668	-0.346512	3.95258	2.88125	5.41591	3.86453	8.36372	2.87923	4.23321	1.1431	2.66416	5.44424	-2.76703	2.92508	3.7525	3.60605	4.9197	2.95866	2.90447	-0.546328	0.175555	2.64319	4.30928	-1.11598	2.2327	4.43275	3.26934	5.95611	2.23257	4.03762	2.75269	5.03823	1.10942	-5.04087	2.54932	-1.21287	1.8576	-3.41864	5.25761	3.56527	-0.135918	4.75984	-1.42172	3.96296	2.71191	3.59484	3.75679	6.81399	0.533068	0.913556
TCGA-78-7162	-0.680372	2.9473	3.00983	5.52638	4.15217	8.65298	3.41452	4.2928	1.3972	2.68493	5.46016	-2.57052	3.34781	3.35515	2.81007	5.1021	3.58231	3.4904	-0.0981021	-0.415268	2.51326	4.2599	-1.44644	2.46774	4.41256	2.91977	6.01388	1.63752	3.39775	2.12201	4.94713	1.04164	-5.44139	3.23569	-1.2411	1.742	-3.66405	5.50003	3.55864	-0.151514	4.05996	-1.49308	4.32199	3.02251	3.39518	3.63811	6.64684	0.853968	0.190367
TCGA-35-5375	-1.2155	2.94211	3.18285	5.56057	4.31516	7.68884	3.33186	3.87072	1.78651	3.57436	5.01867	-2.88066	3.28583	3.87824	4.30955	4.98823	4.50782	3.24669	0.241974	0.0696271	3.6031	5.32673	-2.09669	2.29175	4.49398	1.72968	5.91328	1.82575	3.49467	2.43607	4.89115	1.84843	-7.05947	3.39804	-1.20737	2.18744	-5.63231	5.72603	2.36204	-0.152793	4.09103	-1.73853	5.50106	3.34421	1.73642	3.53506	6.61817	0.570389	0.720167
TCGA-49-4486	-0.991341	2.59383	4.07257	5.56521	4.44373	9.14788	3.07737	4.33061	1.92067	2.15561	5.55717	-3.24639	4.03301	3.74205	3.86848	5.49447	3.63183	4.057	1.45218	-0.415317	2.34868	4.76835	-1.62424	0.588589	4.40871	2.61629	5.82598	0.49128	3.28503	2.17954	4.91784	2.35917	-5.92105	3.07227	-1.36262	4.23981	-3.57341	5.63409	2.45165	0.0385661	3.86858	-1.31226	4.93117	3.6644	3.66921	3.66582	6.24137	0.939087	1.6167
TCGA-J2-A4AG	-0.37216	4.42081	3.31662	5.42283	3.8663	8.37112	3.47324	4.38075	1.98239	3.094	5.25934	-2.74873	3.54214	3.56999	4.40506	4.64396	2.71016	3.73516	0.336018	0.278437	2.84871	4.69692	-1.20357	2.2788	4.42485	2.61635	5.86785	1.87651	4.07293	2.84688	4.90211	1.14153	-5.15049	2.93971	-1.22891	2.03376	-3.67689	5.4779	3.45503	-0.0916175	4.62115	-1.4413	4.56205	2.7394	3.55708	3.9356	6.80239	0.633185	1.95554
TCGA-05-4422	-0.442873	3.95261	3.48626	5.43691	4.21175	8.02179	2.85916	4.50209	1.95268	3.03151	5.3595	-2.91823	3.33918	3.51144	3.79231	5.13306	3.25156	3.22394	0.435317	0.551968	1.95868	5.0685	-1.19849	1.43638	4.43468	2.85397	5.87039	1.30615	3.51197	2.15812	4.76838	0.049904	-4.93629	2.79907	-1.10851	2.76365	-4.28435	5.56541	3.03164	-0.026638	4.18453	-1.28076	5.10298	2.78387	3.91376	3.68465	6.77393	0.432391	2.94929
TCGA-86-7954	-0.69293	3.58726	3.09982	5.40462	4.52749	8.20324	3.39883	4.22103	1.73383	3.5118	5.20184	-2.36021	3.31973	3.4176	3.92173	5.0008	3.29566	2.44425	-0.172793	0.561282	2.75593	4.74909	-1.72109	2.8108	4.45062	2.55149	5.81286	2.61118	3.81852	2.46636	4.97275	1.07572	-5.9164	3.02912	-1.20621	2.26315	-4.50326	5.52548	3.87052	-0.104602	4.41438	-1.86841	5.11024	2.86775	3.26261	3.607	6.83741	0.844534	1.57234
TCGA-44-6774	-0.549417	2.2747	2.91421	5.53631	3.58697	8.4908	3.93083	3.89776	0.972083	3.01666	5.60878	-3.16173	3.00567	2.36073	2.29168	4.52628	3.65745	2.60716	-0.962574	-0.0875351	2.46118	4.33895	-1.60321	3.26486	4.41755	2.62408	6.04119	1.85633	3.33403	1.86445	4.89877	0.545765	-5.79873	3.10834	-1.33632	0.613352	-4.50378	5.51692	3.69998	-0.307194	3.75282	-2.03251	4.10791	2.66255	2.92227	3.4468	6.37276	0.0338367	-1.09293
TCGA-50-6593	-0.688867	3.03104	3.10952	5.47361	4.27389	8.00949	2.90654	4.1544	1.49595	3.15495	5.44431	-2.89584	3.43074	3.11345	2.94883	4.79457	2.68869	2.69524	-0.384742	0.192063	3.06626	4.62234	-1.79058	1.91575	4.43613	2.64209	5.94754	1.43787	3.55366	2.03881	5.01116	0.768159	-5.56018	2.85535	-1.29401	1.84868	-3.45079	5.70138	3.74922	-0.101886	3.86511	-1.73075	4.61801	2.28441	3.59417	3.48865	6.63143	0.526768	-0.195721
TCGA-55-6971	-0.506122	4.35425	2.9069	5.39153	3.95463	8.51255	3.62916	4.37431	1.47571	3.695	5.24074	-2.83742	3.02083	3.31515	4.38662	4.88127	2.9541	3.44131	-0.141079	0.795821	1.95676	4.95046	-1.44653	2.90193	4.46425	2.69846	5.92043	1.54597	3.83275	2.51771	4.83923	-0.257574	-4.83689	2.89794	-1.21279	1.42284	-4.3025	5.45429	3.27608	-0.155064	4.43208	-1.71383	5.11955	2.19065	3.53386	3.79986	6.94647	0.600393	2.11781
TCGA-55-6543	-0.693602	3.7807	3.22738	5.53536	4.73605	8.20221	3.18458	4.15788	1.88382	2.53324	5.72732	-3.09276	3.58283	3.28662	4.50015	5.1997	2.98099	2.91528	0.646656	0.515075	2.42204	4.5905	-1.4342	2.2656	4.39077	3.14557	5.97676	2.51892	3.81654	2.40202	4.9872	1.03568	-5.5643	3.26896	-1.39152	2.91028	-3.33623	5.56691	3.17196	-0.00403646	4.65885	-1.77781	4.63227	2.45987	4.01468	3.65293	6.8984	1.24165	1.9125
TCGA-73-4668	-0.789042	3.30727	2.43626	5.539	4.48772	8.08095	3.34123	4.28096	1.38685	2.97235	5.4567	-2.87768	3.75517	3.93895	3.30434	5.54921	3.90092	3.59022	-0.220529	0.290006	2.95957	4.47754	-1.71384	2.54371	4.4264	2.52579	5.78413	1.57173	3.92936	2.7983	5.09933	1.66525	-5.04715	3.12851	-1.14792	2.20052	-3.00537	5.77368	3.2376	-0.0362835	3.87787	-1.83774	4.53511	3.2679	3.4665	3.65794	6.87991	0.867459	0.525937
TCGA-99-8028	-0.470012	3.86369	3.39831	5.44993	3.83912	7.9353	3.65984	4.22783	1.53863	2.97085	5.39848	-3.25851	3.18546	2.00262	4.05812	4.14712	2.00895	3.17923	-0.976018	-0.0794545	2.48137	4.64556	-1.55383	2.86613	4.43293	2.03778	5.90646	1.20792	3.46312	1.82213	4.85648	0.0347593	-6.43444	2.88786	-1.42215	0.951109	-5.13536	5.60597	3.26249	-0.294235	4.05483	-1.98312	4.89444	1.69809	3.11519	3.52043	6.89259	-0.252042	0.29506
TCGA-55-1594	-0.755242	3.54085	1.99397	5.42434	3.98246	8.28045	3.97327	4.05184	1.41567	3.84759	5.03053	-2.65282	3.22509	4.41687	3.46055	5.30763	4.33089	3.91535	0.41363	0.293757	2.69855	4.68695	-1.62746	2.75417	4.52032	2.29967	5.72593	1.67986	3.85715	2.89098	4.80417	1.6649	-4.34176	2.88748	-0.9398	2.69932	-4.25792	5.54096	3.79362	-0.0792791	4.3489	-1.39385	5.29344	3.76151	3.04604	3.75771	7.01987	0.777776	3.18491
TCGA-44-6778	-0.126117	5.04179	1.71705	5.3299	3.71974	7.62945	4.58465	4.22933	2.05625	4.47142	4.89644	-2.08929	3.03898	3.74603	4.57777	4.75096	3.46267	4.33946	-0.0787944	0.390922	2.65381	5.33766	-0.976639	3.41789	4.54268	1.99562	5.89323	3.2952	4.21702	3.40977	4.78227	1.25739	-3.7846	2.95817	-0.889146	1.38022	-4.56969	5.353	3.62041	-0.224781	4.7183	-1.11643	5.23609	2.84772	3.07857	3.99901	7.10658	0.906775	3.46138
TCGA-55-6642	-0.59986	3.40046	3.06994	5.46555	3.97389	8.05735	3.47315	4.18786	1.18469	3.224	5.4493	-2.94948	2.62783	3.53464	3.14522	4.74637	3.5562	3.03224	-0.853932	-0.186332	1.8251	4.58863	-1.54316	2.8954	4.43813	2.70207	5.90647	2.00464	3.57392	2.4302	4.87237	0.215945	-4.66864	2.86196	-1.16395	0.949588	-4.17662	5.55869	3.23026	-0.204943	4.09392	-1.79663	4.64689	2.94479	3.28696	3.64188	6.64047	0.611672	0.953973
TCGA-86-8278	-0.747397	3.63701	2.98498	5.44579	4.22892	7.91126	2.97804	4.14015	1.39773	2.69285	5.27517	-3.09936	3.20221	3.2015	3.43373	4.7716	3.08541	2.58177	-0.335873	0.407521	2.02851	4.35026	-1.73382	2.0486	4.41464	2.8216	5.88693	2.05775	3.78412	2.35836	5.04929	0.123531	-5.79266	2.93885	-1.31548	2.41832	-4.11623	5.41596	3.31774	-0.0613078	4.09616	-1.84961	4.59688	2.82774	3.45725	3.61052	6.49518	0.861028	1.11775
TCGA-78-8655	-0.798111	3.84274	3.27858	5.4679	4.24014	8.77479	3.33717	4.45638	2.00682	2.61245	5.46068	-2.87305	3.54205	3.02397	4.79656	4.84753	1.98069	3.63118	0.27815	0.617224	2.49592	4.66067	-1.50645	2.00936	4.4208	2.95943	5.95742	1.27159	3.85402	2.57622	5.07195	1.32604	-5.31575	2.95791	-1.33648	2.53684	-4.08338	5.5406	3.32167	-0.0463139	4.34918	-1.6178	4.66993	2.37611	3.7027	3.71165	6.44813	0.855211	2.05883
TCGA-50-6673	-0.548939	3.35365	2.69136	5.47313	4.04674	8.22749	3.21268	4.31406	1.74135	2.94552	5.61781	-2.98981	3.29958	3.70463	3.25577	4.90982	2.89269	3.45178	-0.36889	-0.010101	3.19457	4.43049	-1.47929	2.23356	4.4119	2.92218	5.97538	0.976967	3.85251	2.43545	4.83009	1.14126	-5.01422	2.5311	-1.25565	1.90019	-3.57696	5.59352	4.00089	-0.0736453	4.48227	-1.53817	4.41014	2.17296	2.98792	3.67496	6.7085	0.621817	0.50134
TCGA-93-7348	-0.557689	3.73371	3.02435	5.44389	3.99048	8.65154	2.98709	4.21789	1.67521	3.01161	5.43276	-2.65827	3.46039	3.28458	3.82971	4.76543	3.37415	2.78978	0.265484	0.234918	2.74754	4.63455	-1.28998	2.26798	4.42554	3.03261	6.02182	2.71092	3.9026	2.58213	4.94711	0.6272	-5.78949	3.16628	-1.2086	1.79087	-3.64701	5.3631	3.72963	-0.0445267	4.42884	-1.62508	4.72963	2.76991	3.50815	3.92627	6.776	1.02814	0.591679
TCGA-44-A4SU	-0.377458	4.42236	3.1351	5.37168	4.06505	8.26648	2.97931	4.09011	1.52786	2.72973	5.13015	-2.72065	3.55595	4.04561	4.57356	5.07491	3.04488	2.59253	0.469646	1.34743	2.80418	4.88404	-1.10525	2.07488	4.45668	3.10337	5.82005	3.06676	4.28438	3.10574	5.07954	1.136	-4.64872	2.90196	-1.30648	2.6095	-3.38691	5.35769	3.07183	0.0189327	4.5912	-1.49077	5.04901	2.94558	3.87924	3.90894	7.02358	1.41352	2.47318
TCGA-86-A456	-0.366412	4.12444	3.51818	5.41916	4.23686	8.38375	3.26862	4.40328	1.60767	2.93884	5.52021	-2.42055	3.74855	3.2651	4.38802	5.07516	2.32021	3.1734	-0.00173671	0.870416	3.03361	4.76619	-1.29652	2.61097	4.42039	3.00272	5.86587	2.24896	3.92337	2.67765	4.89235	1.63525	-5.34367	3.09121	-1.2658	2.25087	-3.34783	5.46874	3.3664	-0.0828813	4.42056	-1.4929	4.98436	2.24719	4.03754	3.64262	6.92047	0.708446	1.93289
TCGA-MP-A4TD	-0.457846	3.29288	3.24479	5.41044	3.50755	8.84151	3.48614	4.101	1.3619	2.95433	5.50674	-2.86661	3.13743	2.12508	3.03462	4.91443	2.9548	3.32408	-0.187862	-0.263004	2.57512	4.6953	-1.57352	2.97144	4.45783	2.2919	5.85896	3.02342	3.6799	2.13084	4.97787	0.109221	-6.32708	3.3637	-1.42846	1.5555	-3.6582	5.48408	3.12546	-0.170646	4.19602	-1.71868	4.71625	2.5663	4.06235	3.61607	6.53544	0.463875	0.364029
TCGA-NJ-A7XG	-0.659197	3.86961	3.63349	5.42113	4.43569	8.73415	3.13222	4.28094	2.08011	1.93213	5.57698	-2.91647	3.62522	3.16099	3.49714	5.33988	1.61715	3.68033	0.568543	0.304089	2.23131	4.77945	-1.52803	1.12219	4.41577	2.95833	5.80912	1.86021	4.00604	2.67786	5.09993	1.02269	-5.40272	2.64098	-1.30359	3.83992	-3.1072	5.59103	3.10985	0.0688504	4.67905	-1.45189	4.09078	2.4821	4.12531	3.75136	6.71935	1.04363	1.94532
TCGA-55-8207	-0.47882	3.46181	2.74975	5.5278	3.97599	8.79664	3.5385	4.20047	1.16524	2.59275	5.40604	-2.99477	3.35598	3.09024	3.25786	5.03978	2.62407	3.4018	-0.259421	-0.00857487	2.587	4.57905	-1.26017	2.3935	4.41932	2.85631	5.92143	1.49204	3.73113	2.56114	5.01942	0.167	-5.42423	3.28162	-1.30598	1.72184	-3.37585	5.49221	3.54323	-0.183281	4.44716	-1.47957	4.34966	2.34554	3.79427	3.68839	6.74429	0.682575	0.100375
TCGA-97-7938	-0.549274	3.38447	2.65022	5.56541	4.34314	8.67285	2.86922	4.46427	1.53578	2.49086	5.37353	-2.94024	3.60588	3.77661	3.25626	5.36165	3.40524	2.76913	0.396097	0.546764	2.54204	4.5954	-1.16357	1.90869	4.40725	3.12536	6.0041	0.606085	3.91488	2.87469	4.90089	1.02646	-4.48989	3.16642	-1.19394	2.23703	-3.09128	5.43541	4.06869	-0.0230582	4.43589	-1.27003	4.17712	2.85321	3.65491	3.68731	6.55942	1.26402	0.970975
TCGA-44-2657	-0.549834	3.97186	2.9683	5.37561	4.02878	7.6603	3.40138	4.16104	1.32598	3.14676	5.12948	-2.85679	3.20468	3.05049	4.0848	4.74537	2.69703	2.91415	-0.751828	0.489838	2.86659	4.71218	-1.63252	2.70386	4.45243	2.80558	5.86519	1.91846	3.49266	1.94554	4.92248	0.383868	-6.00239	2.94311	-1.25377	1.89675	-4.10537	5.4361	3.51154	-0.191052	4.16898	-1.79037	4.99877	2.41571	3.27637	3.61395	6.79247	0.507718	1.22079
TCGA-55-8615	-0.603371	3.58631	3.00954	5.36773	4.22888	9.19402	3.96673	4.20064	1.89813	2.75557	5.63192	-2.5816	3.29679	3.41953	3.76945	5.01319	3.60853	4.34013	0.165136	0.304334	2.92419	4.83641	-1.63882	2.73241	4.4715	2.58916	5.72214	2.21784	4.02137	2.87168	5.00634	1.37908	-4.41955	2.92717	-1.27714	2.69008	-3.33687	5.48935	2.83634	-0.0203534	4.49375	-1.48903	5.02502	3.27932	4.05733	3.86908	6.70297	0.725842	2.80475
TCGA-50-5068	-0.813361	3.07358	3.94775	5.52293	3.38677	7.90916	3.34238	4.26397	1.95096	3.30017	5.30873	-3.6562	3.77095	2.97093	4.38525	4.03659	2.42428	2.87482	0.321741	-0.323207	2.62855	5.21651	-1.65377	1.84945	4.4533	2.3288	6.07654	-1.18438	2.99635	1.62823	4.59986	0.450137	-7.08322	3.57086	-1.24652	2.39262	-5.83646	5.55983	3.04389	-0.242394	4.20151	-1.47817	5.46623	2.29459	2.51417	3.63602	6.59338	-0.223471	0.459556
TCGA-97-A4M2	-0.235832	4.34966	3.15822	5.37694	3.79177	8.18377	3.38256	4.17463	1.49041	2.7687	5.24216	-2.7849	3.15774	2.54391	3.74958	4.92661	1.92925	3.06004	-0.217432	0.483298	2.46665	4.71336	-1.38805	2.60889	4.44242	2.83516	5.84008	1.99212	3.69564	2.1951	4.87819	0.291643	-5.47484	2.70314	-1.29897	2.16068	-3.68824	5.30246	3.20127	-0.165132	4.36726	-1.58857	4.65657	2.19498	4.07196	3.61896	6.85866	0.792995	1.95355
TCGA-44-2655	-0.723429	3.00697	3.57183	5.56035	3.76773	8.17886	3.36271	4.39729	1.97635	2.82798	5.42508	-3.02786	3.77711	2.95538	3.60356	5.05497	2.97155	3.76392	0.735181	-0.00454601	2.45883	4.55358	-1.46593	1.55743	4.39373	2.76007	5.95379	1.29481	3.30342	1.98338	4.79	1.2865	-5.85145	2.9525	-1.34475	2.51539	-3.92383	5.49532	2.57192	-0.091613	3.85231	-1.57048	4.77786	2.72711	3.35348	3.74838	6.32095	0.620342	0.603428
TCGA-55-A494	-0.454824	4.12552	2.2259	5.37061	4.68924	10.0346	4.20292	4.1919	2.1397	3.09733	5.65423	-1.67507	3.6696	3.49706	4.77251	5.18294	3.0815	4.06584	1.20584	0.604946	3.47828	5.4087	-1.10813	1.54386	4.46041	3.23211	5.89059	2.93755	4.55088	3.79315	5.09436	2.90353	-3.44825	2.81491	-1.14391	2.94611	-3.04478	5.63858	3.47606	0.119417	4.72753	-1.02538	4.38449	3.01326	4.37643	3.94544	6.85309	1.46804	3.8497
TCGA-71-8520	-0.510554	3.36027	2.70427	5.42659	4.03098	9.26177	3.43522	4.11991	1.51501	3.33828	5.67185	-2.45333	3.53035	2.82783	3.65323	4.9163	2.46958	2.91478	-0.307416	0.987174	3.45283	4.58864	-1.42288	2.2765	4.44104	3.12736	6.12178	2.81514	4.06594	2.67293	5.16974	2.16396	-5.99769	2.90952	-1.36718	1.90378	-3.76504	5.55252	3.29251	-0.0783892	4.50645	-1.58213	4.45819	2.47587	3.36307	3.67521	6.73028	0.815849	-0.0686204
TCGA-62-A46Y	-0.426034	4.26479	3.19415	5.43614	4.25483	8.17456	3.21061	4.30198	2.02898	3.23688	5.27738	-2.77595	3.64949	3.47869	5.00384	4.79402	2.26495	3.1982	0.258867	0.79717	2.79742	4.87361	-1.42507	1.7501	4.4453	2.69499	5.91475	2.11356	3.82667	2.56807	4.89616	1.11677	-5.45302	2.80213	-1.28736	2.52258	-4.12618	5.62187	3.00617	-0.0443999	4.45714	-1.5655	4.89052	2.0689	3.53037	3.69124	6.70403	1.00025	2.52647
TCGA-J2-8194	-0.47357	3.64258	3.26752	5.53456	3.88239	8.39097	3.06989	4.3731	1.81087	2.8678	5.41319	-3.04741	3.19937	2.97942	3.64951	4.99112	3.37109	3.2614	-0.0140603	-0.0258852	2.32052	4.48551	-1.35509	2.39347	4.4191	2.71536	5.9298	0.994135	3.7821	2.77883	4.80085	0.67757	-4.56033	3.19327	-1.34928	1.91375	-3.59628	5.58183	3.08981	-0.13863	4.13679	-1.21839	4.29682	2.72295	3.64025	3.77486	6.71335	0.607723	1.46727
TCGA-97-A4M0	-0.660794	4.08292	3.63762	5.35638	4.4707	8.13789	3.08231	4.42673	1.94336	2.55255	5.26552	-2.88959	3.59863	2.88286	4.10747	5.06834	1.84239	3.24935	0.391953	0.919628	2.72657	4.91292	-1.74259	1.98231	4.43794	2.81636	5.76056	1.9177	3.96829	2.56246	5.08671	0.532598	-5.6234	2.9641	-1.38825	3.13381	-3.63076	5.52976	3.36314	-0.00641791	4.32862	-1.59948	4.56684	2.32513	3.91766	3.67439	6.48219	0.991604	1.55817
TCGA-91-A4BD	-0.589381	4.03771	3.87718	5.46082	4.62946	8.45268	3.4926	4.19814	2.14025	2.46256	5.36567	-3.18831	3.89234	2.86966	4.6418	4.95619	2.05575	3.80355	0.664645	0.458066	2.68955	5.02047	-1.52068	1.82718	4.42686	2.73904	5.81173	0.741023	3.482	1.9766	4.82775	0.244142	-6.27422	3.5082	-1.38025	3.67903	-4.41679	5.64768	2.92394	-0.0495825	4.59193	-1.45082	5.03892	2.05688	3.7171	3.60905	6.82168	0.787753	2.30966
TCGA-86-7701	-0.533509	4.16723	2.54788	5.41765	3.71161	7.99945	3.46697	4.21742	1.76237	3.73908	5.40095	-2.97711	3.08551	3.67451	4.07994	4.98688	3.54848	3.2902	-0.779824	0.489173	2.01252	4.94701	-1.19356	3.08173	4.48481	2.44421	5.95157	1.15895	3.66737	2.49767	4.67534	0.181311	-4.52615	3.06337	-1.06552	1.27617	-4.97389	5.47322	3.10495	-0.125341	4.51368	-1.52793	5.38442	2.67239	2.81988	3.97824	7.02864	0.197424	2.92635
TCGA-44-7660	-0.851954	3.73548	1.78603	5.34976	4.07877	7.62295	3.79302	4.13136	1.89943	4.26089	4.95489	-2.00033	3.20957	3.89816	4.11557	5.09416	4.64638	3.08979	-0.0855352	0.862575	3.19474	5.46985	-2.03812	2.14747	4.54306	1.83778	5.77825	1.95878	4.18137	3.45108	5.16117	2.29846	-4.97426	2.88546	-1.00235	2.06618	-5.02325	5.57415	3.23694	-0.00156624	3.66243	-1.47126	5.05337	3.9684	2.45168	3.8911	6.01659	1.19656	1.91133
TCGA-67-6215	-0.762053	3.99153	3.29918	5.46427	4.79835	8.37759	3.39967	4.46127	2.64344	3.33652	5.42946	-2.58656	3.4532	3.22338	3.88441	5.32651	2.5394	4.32768	0.722043	0.204636	2.7231	4.90034	-1.4716	1.22967	4.42054	2.76318	5.89497	2.06619	3.89659	2.7442	4.99952	1.53534	-5.22333	3.03323	-1.13519	3.38764	-3.4929	5.70692	3.12874	0.0432369	4.30558	-1.4991	4.65063	2.61054	3.5788	3.79013	6.19323	0.91186	2.24072
TCGA-86-8358	-0.00882082	5.74829	0.429427	5.16224	3.94716	8.40052	5.52395	4.08684	2.76509	5.2374	4.72991	-0.910263	3.21459	5.48853	5.23726	4.46115	5.00483	5.4561	0.708007	0.947578	3.77924	5.92739	-1.05924	3.00166	4.65019	1.62903	5.7838	4.68089	5.3795	5.08902	5.08681	2.80485	-2.21881	3.50851	-0.540055	2.08613	-3.99912	5.45615	4.082	-0.000435341	5.29093	-0.390973	5.14186	4.07818	3.09645	4.42165	7.36794	2.48706	6.38838
TCGA-91-6840	-0.878245	3.41696	1.82599	5.38614	3.89231	7.91783	3.28443	3.89113	1.38178	2.9991	4.96925	-2.51704	3.02898	4.43193	3.26962	4.95276	4.06073	3.69535	-0.0444454	0.206412	3.36987	4.81854	-1.80764	2.83135	4.47954	2.53453	5.76934	2.04103	3.95255	2.97973	5.00689	1.96158	-4.54031	2.6181	-1.00808	1.67241	-4.46691	5.39473	3.6916	-0.0231639	4.44499	-1.56334	5.18326	3.28875	2.75566	3.46558	6.81349	0.928472	1.60314
TCGA-97-8179	-0.58509	3.25532	2.7907	5.51741	4.06429	8.6544	3.31503	4.26899	1.81342	3.05884	5.44886	-2.04804	3.70577	3.18963	3.12278	5.6646	3.70369	3.73282	0.4936	0.495631	3.38464	4.50475	-1.402	2.34459	4.45565	3.11511	5.95514	3.24032	3.8633	2.59729	5.07441	1.73051	-5.55799	3.28864	-1.3017	2.95393	-2.30273	5.524	2.71964	-0.0214285	4.1744	-1.38925	4.4109	3.27168	3.88602	3.66562	6.68863	1.50649	0.836275
TCGA-99-AA5R	-0.247595	3.95193	3.00494	5.40097	3.65946	8.12585	3.64732	4.0313	1.23398	2.58684	5.24101	-2.88009	3.24394	2.26423	3.37907	4.56222	2.1109	3.17479	-0.232798	0.303249	2.66144	4.54868	-1.46381	2.92242	4.44379	2.85166	5.87491	1.68788	3.50185	2.00595	4.94232	0.0731998	-5.74067	3.04958	-1.35541	1.66964	-3.96702	5.37537	3.34496	-0.221491	4.3489	-1.79422	4.40646	2.18025	3.67458	3.58694	6.86722	0.632318	0.674691
TCGA-MP-A4TH	-0.474178	4.29763	3.286	5.40481	4.33699	8.35693	3.49349	4.33209	1.63591	2.68746	5.35037	-2.82027	3.14002	2.38683	3.64557	5.09216	2.50842	3.37903	-0.0516301	0.445935	2.22954	4.73743	-1.54382	2.31801	4.41995	2.9725	5.82765	1.87261	3.70298	2.152	4.94994	0.209713	-5.14943	2.88649	-1.33604	2.41247	-3.75965	5.45257	3.38964	-0.0860601	4.41214	-1.6315	4.22469	2.53035	4.13066	3.69325	6.79505	0.620758	2.2124
TCGA-78-7158	-0.600744	3.91563	2.98776	5.44967	4.31153	8.2611	3.4566	4.39431	2.20374	2.36767	5.36231	-2.94708	3.41554	2.58731	4.05026	5.05911	2.94903	4.01551	0.406487	0.472774	1.87108	4.80333	-1.54943	1.85001	4.46026	2.7579	5.95615	0.261779	3.86763	3.13437	5.10232	0.960845	-4.67576	3.00841	-0.996048	2.715	-3.76623	5.63167	3.08373	-0.073775	4.24199	-0.962557	4.41874	2.91198	3.26726	3.85705	5.8406	0.790853	2.47346
TCGA-50-5944	-0.507088	2.75173	2.56694	5.55401	4.09356	8.88138	3.08163	4.16501	1.01398	2.78407	5.57925	-2.57377	3.54099	3.76286	2.90213	5.2134	3.92683	2.7588	0.394208	0.308637	2.93941	4.29544	-1.24984	2.24536	4.40179	3.6092	6.04938	2.37764	3.66216	2.58788	5.07629	1.62849	-4.9132	3.38999	-1.18107	2.06171	-2.67324	5.36162	3.87857	-0.101127	4.3033	-1.47699	4.30875	3.28524	3.87654	3.60905	6.52988	1.50858	0.096987
TCGA-44-8119	-0.542198	3.40171	2.47432	5.40082	3.94148	8.83761	4.16179	3.90378	1.89115	3.85953	5.31945	-2.71353	3.04338	4.20044	3.84197	4.82017	3.79376	3.54827	-0.213287	0.599894	2.28877	4.95184	-1.59119	3.25661	4.49117	2.01757	5.72425	2.56035	3.78251	2.84454	4.78568	1.07684	-4.89227	2.81324	-1.16336	1.46568	-4.77555	5.55772	3.17009	-0.167982	4.13497	-1.76742	4.88086	3.19437	3.12323	3.76282	6.80724	0.50319	2.06102
TCGA-05-4427	-0.727533	4.21887	2.79635	5.47362	4.75201	8.0498	3.44782	4.58534	1.64762	2.82719	5.24839	-3.1957	3.64474	4.17873	4.50825	4.96513	3.06878	3.43039	-0.0436965	1.20444	2.05601	4.54429	-1.90068	2.19065	4.46216	2.09397	5.84815	-1.07967	4.16731	3.48771	4.96483	0.608742	-4.49849	2.65681	-1.16266	2.47368	-3.85624	5.81107	3.13634	-0.0816189	4.10555	-1.6261	4.16458	2.85324	3.22638	3.51143	6.87643	1.04634	2.63374
TCGA-38-7271	-0.703009	3.61862	3.38788	5.50016	3.97587	7.72779	3.45316	4.41455	1.43475	2.99864	5.28806	-3.2532	3.21757	2.16091	3.43224	4.59146	2.50703	3.13331	-0.774946	-0.30447	2.06417	4.38966	-1.63345	2.95057	4.4268	2.55321	6.00658	0.959318	3.31224	1.78368	4.86867	-0.559821	-6.04129	3.09797	-1.35077	1.17511	-4.68276	5.57484	3.56504	-0.280568	3.96972	-1.85328	4.68399	2.15732	3.09534	3.62213	6.61773	-0.100104	0.0756807
TCGA-93-A4JN	-0.544237	3.68107	2.33769	5.31277	3.46255	8.03419	3.70078	4.10809	1.18813	3.07465	5.0955	-2.55073	3.23409	3.1064	3.80007	4.85993	3.07685	3.10217	-0.677635	1.0504	2.82393	4.93991	-1.71039	2.67718	4.49054	2.30033	5.87218	2.18802	4.20366	2.86535	5.14148	0.922574	-4.9471	2.60067	-1.26046	1.76836	-4.16958	5.3722	2.93834	-0.082777	4.19251	-1.96069	4.32304	2.61181	2.93569	3.69707	6.45168	0.696291	0.753302
TCGA-05-4389	-0.865023	3.69284	2.99616	5.4553	4.73954	8.17541	3.37994	4.49347	1.88326	3.81861	5.62378	-2.16194	3.68959	3.50571	4.09488	5.37992	3.61339	3.84773	0.21163	0.194275	3.12472	4.90756	-1.75916	2.48478	4.45377	2.64889	5.91693	2.18164	3.77837	2.35524	5.009	1.04065	-5.29851	3.26056	-1.1717	2.48542	-3.76096	5.77631	3.57468	-0.0287806	3.99821	-1.55917	5.4338	2.95621	3.49452	3.72191	6.67747	0.726994	1.52423
TCGA-55-7283	-0.661706	3.83757	3.41133	5.50016	4.39274	8.50626	3.58861	4.49296	2.02443	3.068	5.42879	-2.499	3.63654	2.89363	4.38273	4.93152	2.46838	4.0437	0.340514	0.251682	2.70204	4.6934	-1.34885	1.82673	4.42973	2.86249	6.01424	1.31323	3.76569	2.85979	5.03111	1.89764	-4.99696	2.87144	-1.21317	2.25703	-4.10936	5.74025	3.33509	-0.0865046	4.23713	-1.23194	4.61048	2.52112	3.30407	3.6859	6.70833	0.593333	1.71477
TCGA-78-7154	-0.648395	3.2789	2.5479	5.53931	4.45072	8.04943	3.17733	4.30907	1.72474	3.59135	5.74073	-2.70792	3.84843	3.04211	3.06743	5.7026	4.47775	3.96708	-0.218734	0.331598	2.86156	4.66693	-1.70537	2.20578	4.46028	2.88331	5.93566	2.17596	3.66355	2.34018	4.92167	1.48239	-5.42032	3.20464	-1.04588	2.35665	-3.5343	5.85964	3.21792	0.0663154	4.56256	-1.10609	5.057	2.6779	3.20248	3.84012	6.67962	0.589194	1.3787
TCGA-38-4628	-0.996799	2.69863	3.60152	5.55018	4.27886	9.23112	3.59449	4.24444	1.91619	3.32445	5.44651	-2.98817	3.96281	3.59421	4.32186	4.88659	3.617	3.34139	0.501729	-0.0922107	3.52067	4.89543	-1.7839	1.97583	4.4316	2.48437	5.95626	0.940166	3.46695	2.26864	4.88237	2.00068	-6.51056	3.3063	-1.24114	2.87203	-4.19798	5.53758	3.179	-0.0999757	3.93803	-1.73963	5.42417	3.0837	3.29131	3.5805	6.42107	0.270046	0.569534
TCGA-55-8512	-0.359579	4.02507	2.85398	5.40667	4.05339	8.40502	3.32571	4.09273	1.57246	2.67166	5.17609	-2.65867	3.5388	3.66139	3.19649	5.2997	2.87353	3.479	0.541445	0.366749	3.06872	4.61832	-1.51106	1.67771	4.43315	2.6765	5.86118	2.23634	3.98969	2.56352	4.9844	1.09114	-4.93871	2.54945	-1.29251	2.6372	-3.10472	5.25128	3.16866	0.0211082	4.47296	-1.4469	4.37792	3.01573	4.06832	3.84448	6.86765	1.42336	1.48471
TCGA-49-AAR0	-0.268045	4.28525	2.61126	5.33253	4.22301	8.50242	4.35359	4.00992	1.83628	3.33187	5.30389	-2.10417	3.65623	3.01184	4.44268	5.27448	3.4242	4.16026	0.28291	0.485502	3.49641	5.12875	-1.33066	3.01387	4.50954	2.08144	5.81256	3.91915	4.03389	2.51114	4.97741	1.22011	-5.47233	3.6116	-1.20611	2.58194	-3.34766	5.41975	3.21322	-0.0665585	4.49828	-1.49858	5.14253	3.07734	4.1241	3.84176	6.94446	1.15518	2.64634
TCGA-55-7570	-0.577329	3.88788	1.80407	5.4719	3.83766	8.0727	3.9561	3.97331	1.72501	3.79753	5.06411	-2.63085	3.00124	3.66203	3.61357	5.66173	5.23648	4.35474	0.0470261	0.810086	2.80984	4.94756	-1.75936	2.75018	4.55556	1.98444	5.79676	0.929422	3.81722	3.1335	4.95065	1.15953	-4.17967	3.2096	-0.964965	2.75386	-3.88315	5.76633	2.83532	-0.0995809	3.95079	-1.10152	5.30197	3.72345	2.89591	4.01299	6.50622	0.353402	3.60328
TCGA-86-8671	-0.411512	4.03721	3.19173	5.36523	3.95691	7.73646	3.61405	4.23095	1.32095	2.81408	5.24654	-3.207	3.00576	1.84007	3.72028	4.52198	1.87644	2.92795	-0.928252	0.513609	2.24207	4.59632	-1.71858	3.13776	4.44323	2.61788	5.92847	1.78553	3.4632	1.65977	4.92702	-0.713074	-6.25477	2.79659	-1.38292	1.51565	-4.63313	5.44034	3.53204	-0.25645	4.18226	-1.97364	4.67545	1.72428	3.35048	3.49956	6.69356	0.1519	0.741882
TCGA-49-AARR	-0.256521	4.1906	2.84145	5.39174	3.43222	8.01032	3.39095	4.03106	1.55494	3.07286	5.13249	-2.86506	3.18817	3.21409	3.36313	4.61027	2.57872	3.04103	-0.197022	0.0416824	3.05525	4.5277	-1.48892	2.21612	4.44275	2.44319	5.94022	2.30598	3.76906	2.28879	4.87992	0.23023	-5.39697	2.61637	-1.30111	1.48031	-4.23052	5.23168	3.24935	-0.150431	4.54213	-1.64419	4.49889	2.44782	3.69069	3.73733	6.93195	0.791377	1.16582
TCGA-49-6744	-0.463203	3.47006	3.27375	5.50117	4.02315	8.02178	3.33517	4.35113	1.64987	2.97812	5.4714	-2.789	3.46736	3.26627	3.3802	4.63861	2.87347	3.03265	-0.78376	0.160173	2.48458	4.5389	-1.37902	2.55061	4.41494	2.74062	6.03515	1.61475	3.60652	2.02503	4.84679	0.476282	-5.94326	3.00077	-1.27578	1.43675	-4.30971	5.57535	3.74279	-0.189565	4.07037	-1.66406	4.59607	2.46104	3.1144	3.58921	6.7656	0.0965722	0.166518
TCGA-93-A4JO	-0.56284	4.28086	2.68885	5.35747	4.0434	8.35714	3.67301	4.16113	1.83737	3.64588	5.35794	-2.28427	3.17613	2.91307	4.51448	4.83927	2.04208	3.27555	-0.137277	0.67149	3.13382	4.89668	-1.68458	2.27358	4.47295	2.6638	5.99409	3.0501	3.93853	2.58358	5.03934	1.38977	-5.79276	2.5411	-1.26379	1.8415	-3.90896	5.54984	3.48435	-0.112976	4.16227	-1.80716	4.56196	1.97613	4.01019	3.54132	6.79206	0.900256	1.3381
TCGA-86-8280	-0.380166	3.81336	2.93454	5.44546	4.11195	8.03754	3.48971	4.11877	1.69964	3.0693	5.31332	-2.75071	3.4593	3.29715	4.03992	4.99435	3.1211	2.89845	-0.0418869	0.750699	2.86281	4.58129	-1.11406	2.6343	4.4364	3.03253	6.04537	3.05452	3.82314	2.3777	5.04845	0.788332	-5.28343	3.29259	-1.33697	1.70952	-3.81806	5.4291	3.29386	-0.118252	4.31162	-1.62068	4.66442	2.69263	3.42033	3.76591	6.71411	1.17602	1.33757
TCGA-73-7498	-0.431971	3.57178	3.16771	5.43853	4.04962	8.49001	3.39269	4.17255	1.42456	2.19133	5.29977	-2.81046	3.26297	2.61872	3.14897	5.07758	2.91798	3.25907	0.121533	0.263895	2.34428	4.5111	-1.26625	2.25499	4.43217	3.23648	5.81587	1.8028	3.65511	2.34287	5.00942	0.338963	-5.00039	2.86901	-1.34994	2.7935	-3.24449	5.39337	3.13714	-0.100477	4.12827	-1.46764	4.27492	2.82547	4.05803	3.74561	6.60724	0.996728	1.46045
TCGA-55-8203	-0.54386	4.19976	2.8544	5.39221	4.14698	8.29109	3.72544	4.3532	2.08642	3.67161	5.34865	-2.51117	3.20232	3.34305	4.37334	5.0919	2.73048	3.88049	0.136869	0.373055	2.32016	5.23177	-1.25721	2.49353	4.47594	2.68249	5.94174	2.3606	3.92681	2.77122	4.86619	0.352091	-4.73613	3.02077	-1.10441	2.08872	-4.22866	5.55112	2.96657	-0.0409232	4.44669	-1.45275	5.10252	2.67089	3.59034	3.91462	6.94479	0.76477	2.63217
TCGA-86-7953	-0.713531	4.46897	3.05722	5.46168	4.29245	7.98653	2.85727	4.5063	2.0351	3.39745	5.41408	-2.96421	3.63197	3.35263	4.3552	4.98692	3.53991	3.19198	-0.187299	0.997346	2.32617	4.71305	-1.75851	2.94521	4.4652	2.21666	5.86526	1.00445	3.9464	2.72981	4.89398	0.181386	-5.21886	3.35218	-1.23169	2.54307	-4.19292	5.64032	3.8423	-0.0767365	4.41359	-1.6234	5.19537	2.91162	3.5034	3.84612	6.86126	0.341617	2.79314
TCGA-J2-A4AE	-0.26806	4.71408	2.87548	5.3841	4.08871	8.32726	3.18064	4.39515	2.18618	2.97991	5.04623	-2.61448	3.51668	3.95156	4.76408	4.9686	3.04274	3.31329	0.305157	1.01457	3.06757	5.0461	-1.2213	1.75051	4.45828	2.66102	5.82481	1.35146	4.20681	3.13356	4.95161	1.45784	-4.56431	2.98786	-1.1836	2.59718	-4.15915	5.5031	3.32576	0.00907952	4.70658	-1.36488	4.59507	2.74384	3.68385	3.90005	6.77287	1.14214	3.70632
TCGA-4B-A93V	-0.462939	4.01845	3.64844	5.42057	3.83959	8.96132	3.44674	4.2054	2.01536	3.24543	5.47735	-2.86328	3.46583	2.65509	4.54856	5.50838	3.69301	4.24028	-0.046713	0.565143	2.04634	4.88745	-1.14091	2.7567	4.49472	1.95473	5.81573	2.22068	3.98862	2.53377	4.89756	1.56577	-5.63268	3.10882	-1.33361	2.91196	-3.65586	5.57018	2.12814	-0.0655158	4.24502	-1.43186	5.08239	3.05419	3.70779	3.95297	7.05652	0.294875	3.45894
TCGA-97-7553	-0.445064	3.90341	2.65357	5.46791	4.07506	7.77182	3.19945	4.30633	1.82214	3.14894	5.18798	-2.67619	3.29685	3.23357	3.74643	4.82949	2.93569	2.78913	-0.389592	0.357732	2.49355	4.63702	-1.48781	2.73112	4.44264	2.5592	5.99411	1.79159	3.65927	2.34594	4.86548	0.609313	-5.34261	2.87515	-1.25561	1.44734	-4.28519	5.46999	3.4792	-0.167854	4.07574	-1.74409	4.7669	2.21801	3.26232	3.54915	6.74716	0.791285	1.04392
TCGA-NJ-A55A	-0.345362	4.29066	2.74349	5.40227	3.5983	7.72045	3.45459	4.22441	1.61132	3.03082	4.93883	-2.92743	3.20938	3.94695	3.67954	4.71486	2.70141	3.23247	-0.0127863	0.324637	2.51994	4.74435	-1.41352	1.97118	4.45846	2.68897	5.95924	1.69407	3.96322	2.71632	4.90816	0.334381	-4.8606	2.45378	-1.20954	1.58736	-4.45192	5.25419	3.45581	-0.128549	4.61713	-1.34056	4.47542	2.65977	3.46967	3.79115	6.66018	0.843653	1.54841
TCGA-O1-A52J	-0.345694	4.11769	3.17324	5.48879	4.62168	8.26221	3.3323	4.31647	1.64852	3.38226	5.40492	-2.1791	3.90237	3.8126	3.75926	5.89384	2.81133	3.46714	0.717177	1.55423	3.46943	4.85157	-0.970409	2.55293	4.43605	3.52007	5.81529	4.7952	3.89179	2.18861	5.13522	1.03128	-5.21229	3.39525	-1.27737	4.13205	-3.04699	5.29303	3.12158	-0.00139036	4.39647	-1.8579	5.25896	2.61016	4.31305	3.54648	6.96873	1.44213	2.20524
TCGA-L4-A4E6	-0.253398	4.06848	3.42278	5.47385	4.07169	8.36985	3.60057	4.25896	1.38039	2.71398	5.45583	-2.96044	3.32469	1.62216	3.67643	4.94898	1.52933	3.26295	-0.224146	0.370619	2.81013	4.3857	-1.3823	2.9412	4.41361	2.74239	5.93483	1.81806	3.45034	1.85925	4.84387	0.424745	-6.0021	2.9753	-1.46303	2.03765	-3.68498	5.41632	3.32139	-0.263216	4.38349	-1.79081	4.46978	1.73337	3.77267	3.51018	6.856	0.626358	1.00936
TCGA-73-4662	-0.566377	4.32395	3.17547	5.45778	4.60927	8.55872	3.60904	4.49724	2.09354	3.21221	5.28446	-2.65146	3.39193	3.96901	4.74076	5.05774	2.99845	3.77571	0.583265	0.404605	2.91126	4.81099	-1.3677	2.14335	4.44572	2.91853	5.85509	1.73711	3.97481	3.05729	4.99087	1.41582	-5.04095	2.56739	-1.18683	2.47358	-3.51575	5.60202	3.38351	-0.107086	4.31855	-1.48182	5.01524	2.68087	3.62564	3.76938	6.77696	0.8926	2.18587
TCGA-05-4424	-0.826429	3.72963	2.61819	5.49022	4.32291	8.38084	3.60525	4.31338	1.77386	3.9554	5.24789	-2.01659	3.31503	4.24592	3.38823	5.372	4.12544	3.604	-0.303795	0.12989	3.26149	4.96147	-1.51291	2.61832	4.46217	2.79249	5.93589	2.20931	4.21851	3.30505	4.93299	2.30552	-4.83159	2.89639	-1.02567	1.78912	-4.04606	5.63743	3.37636	-0.0651803	4.38238	-1.46375	4.86266	3.25264	3.19108	3.5407	7.09124	0.543393	1.25747
TCGA-67-3770	-0.625324	3.1286	3.58158	5.52554	4.12313	8.76534	2.96155	4.19606	1.80599	2.89381	5.71258	-2.93753	3.84125	3.85993	3.8561	4.88814	3.02579	3.20257	0.807905	0.322195	3.63928	4.7549	-1.21127	2.03941	4.39999	3.03504	5.98402	1.60028	3.44625	2.32292	4.81267	1.84831	-6.13412	3.83556	-1.29971	3.08231	-3.18334	5.51819	3.44434	-0.0952922	4.35235	-1.2975	5.3319	3.15307	3.80647	3.72829	6.69045	1.23349	0.938329
TCGA-MP-A4SW	-0.518395	3.81344	3.66782	5.36318	4.49815	8.20299	2.88406	4.27893	1.84535	2.93778	5.52012	-2.5595	3.68976	2.82569	3.4948	5.29076	2.06118	3.0732	0.152094	1.03133	3.02737	4.83457	-1.6123	2.0938	4.43226	3.09344	5.92312	2.23479	3.82927	2.05834	4.96331	0.720831	-6.00473	3.3611	-1.28106	3.06035	-2.46323	5.58687	3.79849	0.0517929	4.49858	-1.6871	4.80081	2.43066	4.30225	3.6231	6.83123	1.40997	1.35097
TCGA-44-7659	-0.408144	4.21652	3.37885	5.42391	4.41863	8.32114	3.3536	4.30286	1.7481	2.20164	5.30945	-2.96094	3.42488	3.63935	3.8323	5.05443	2.72258	3.3653	0.156804	0.338678	2.01707	4.71573	-1.3758	1.75914	4.43565	2.83101	5.7854	0.488143	3.9771	2.7045	4.94181	0.411923	-5.21252	2.72334	-1.2239	2.86104	-3.71551	5.49655	3.25286	-0.0504293	4.58932	-1.24378	4.27228	2.7023	3.65986	3.73823	6.53177	0.840798	2.34382
TCGA-05-5423	-0.726407	3.52456	3.65799	5.57896	4.03783	8.15322	2.8311	4.32235	2.09728	3.26058	5.3856	-3.24412	4.15367	2.84265	4.30429	5.08848	2.78026	3.06446	0.987324	0.150807	2.82268	5.00629	-1.06277	1.94919	4.4157	2.83242	6.07641	1.43579	3.34108	1.96859	4.74407	1.32635	-6.86691	3.67515	-1.32241	3.1257	-4.111	5.41149	3.23676	-0.118102	4.20738	-1.49276	5.54097	2.49681	3.63377	3.64892	6.59791	0.85808	1.25265
TCGA-L9-A50W	-0.593202	3.30795	3.06373	5.37628	4.68135	9.1932	2.95833	4.03573	1.45084	2.06929	5.6275	-3.11326	3.75178	2.22274	3.26739	5.09414	2.39199	2.52526	0.172038	1.01843	2.62123	4.53329	-1.42052	2.13068	4.41793	3.43241	5.93336	1.71109	3.70756	1.90476	5.10334	0.175335	-5.60979	2.90034	-1.47152	3.01294	-3.15579	5.42775	3.81284	0.0371224	4.44776	-1.69339	4.28644	2.31346	4.019	3.61766	6.77545	1.25261	0.228999
TCGA-50-7109	-0.707503	3.99541	2.74038	5.44607	4.02106	8.79313	3.26018	4.28234	1.84426	3.22613	5.33251	-2.57974	3.15731	4.04445	4.02742	5.2268	4.13575	3.61576	-0.0170444	-0.0409582	2.3034	4.91593	-1.34286	2.70926	4.46998	2.68274	5.94273	1.27703	4.04796	3.33001	4.88198	1.81621	-4.28055	3.06286	-1.0191	1.95711	-4.27154	5.53689	3.18963	-0.0502781	4.53458	-1.31808	5.14805	3.54986	3.13689	3.8677	6.92364	0.655303	3.40964
TCGA-86-A4P8	-0.0144323	4.34775	2.97639	5.40568	3.81483	8.24247	3.54136	4.15924	1.18083	2.52597	5.27141	-2.81496	3.18441	2.30785	3.67616	4.73435	1.82081	3.1947	-0.110179	0.599282	2.52399	4.40452	-1.26529	2.90707	4.43422	2.96891	5.86999	1.4527	3.61696	2.22922	4.90838	0.23929	-5.41187	2.74946	-1.31442	2.0086	-3.83259	5.27794	3.48304	-0.225166	4.66696	-1.61463	4.16446	2.07282	3.72956	3.6324	6.86777	0.783217	1.48413
TCGA-49-4510	-0.698058	3.14407	3.55461	5.5101	4.21297	9.42711	3.58959	4.0748	1.4648	2.37887	5.76858	-3.01275	3.54666	3.01076	3.52364	5.20169	3.20841	4.01763	0.0107138	-0.113813	3.06348	4.65092	-1.41288	2.50472	4.41099	2.88011	5.82724	1.44868	3.51406	2.2828	4.86573	1.23139	-5.71922	3.15095	-1.41921	2.67041	-2.75242	5.50249	2.8852	-0.137483	4.28458	-1.50243	4.59576	3.10249	4.28175	3.66917	6.68002	0.803056	1.37768
TCGA-05-4417	-0.580043	3.4685	3.08323	5.51828	3.98184	8.28891	3.44978	4.36432	1.62507	2.89983	5.55302	-3.16897	3.17162	2.41488	3.25569	4.91499	3.36938	3.49914	-0.622452	-0.234466	2.23074	4.38285	-1.4339	2.89426	4.42674	2.53866	6.03258	1.22598	3.54809	2.17008	4.73416	0.0656515	-5.34104	3.39517	-1.28573	1.28625	-3.80358	5.5792	3.46632	-0.205964	4.29649	-1.51979	4.80254	2.49964	3.39777	3.71653	6.80321	0.23052	1.1257
TCGA-64-1680	-0.752447	3.50086	3.81745	5.52156	4.50671	8.8312	3.32114	4.43864	2.01228	2.56297	5.56413	-2.97381	3.8141	3.01981	4.38444	4.94814	2.57143	3.67402	0.632547	0.048826	2.47657	4.742	-1.32372	1.08853	4.40404	2.88923	5.97778	0.102083	3.43657	2.34571	4.88249	1.17666	-6.03475	3.06966	-1.15643	3.08021	-4.13347	5.67703	3.08301	-0.0541193	4.47635	-1.21134	4.76071	2.64182	3.69851	3.78026	6.39678	0.659862	1.82109
TCGA-MP-A4TE	-0.682135	3.7554	2.53298	5.40881	4.85438	9.53237	3.67898	4.24534	2.26757	3.03573	5.83345	-2.28704	3.82751	3.38161	4.1043	5.8728	3.52308	4.68887	0.44597	0.332638	2.74411	5.08051	-1.24449	2.72609	4.4832	2.56217	5.87636	2.60266	4.22707	3.11104	4.95692	1.41465	-4.45503	3.38949	-1.17727	3.12374	-2.68001	5.72788	2.81775	0.0931027	4.58906	-1.21975	5.2249	3.23791	4.37485	4.04557	6.99156	1.04098	3.06895
TCGA-69-8255	-0.546224	3.76149	2.74221	5.37114	4.1926	8.45901	4.01403	4.06453	1.82966	4.26792	4.90057	-2.047	2.26668	2.73183	4.48816	5.06359	2.8999	4.22395	-0.594199	0.167102	2.93333	4.98402	-1.48951	3.105	4.52696	1.77689	5.68558	2.21505	3.60158	2.61794	4.8004	2.42666	-5.41342	2.18158	-1.14413	1.74452	-5.81935	5.99313	3.1093	-0.153428	4.29373	-1.5065	5.80577	1.6581	3.07985	3.59944	6.33761	-0.700107	2.68024
TCGA-55-7914	-0.441112	4.08966	2.659	5.41952	4.12526	7.99441	3.52565	4.32538	1.97395	2.96453	5.2244	-2.81755	3.1684	2.99241	4.23273	4.57662	2.73338	2.79183	-0.569114	0.313705	2.28275	4.81196	-1.43016	2.11696	4.45419	2.80983	5.95172	0.768774	3.87833	2.90297	4.95806	1.21101	-4.41185	2.60317	-1.16979	2.20751	-4.64701	5.69669	3.32806	-0.108099	4.48132	-1.26191	4.57875	2.33195	3.19606	3.72684	6.59708	0.668603	2.3038
TCGA-62-8397	-0.602087	3.467	3.31241	5.48099	5.05078	8.58794	3.06216	4.21032	1.77558	2.12055	5.8576	-3.49313	3.80123	2.21139	3.8106	5.35611	2.20866	3.22057	-0.104097	0.881109	2.59398	4.51822	-1.45358	2.12524	4.37941	3.41732	5.92523	1.38152	3.42172	1.88677	5.06153	0.523927	-5.52315	3.28096	-1.46499	3.61281	-2.97855	5.70531	3.09318	-0.0350805	4.00144	-1.84935	4.58012	2.03842	3.8362	3.57216	6.67144	1.11324	1.50587
TCGA-05-4432	-0.6168	3.74508	3.05405	5.36773	3.91393	8.41072	3.81638	4.10785	1.85616	3.82395	5.32404	-2.38519	3.2122	4.42441	3.9928	5.11345	3.92788	3.54962	0.265483	0.271752	3.00062	5.11619	-1.39359	2.76557	4.49551	2.40348	5.79148	3.12098	3.95322	2.88367	4.88848	1.66113	-4.56908	2.94671	-1.18486	2.35762	-4.19323	5.44315	3.15424	-0.0770094	4.25658	-1.62183	5.17059	3.39635	3.26451	3.81398	6.92705	0.652812	2.24461
TCGA-55-8621	-0.26022	3.97488	2.86803	5.41533	3.87085	8.04689	3.79408	4.12666	1.42969	3.18841	5.3306	-2.66047	3.24494	2.89311	3.58986	4.75336	2.47805	3.33194	-0.367943	0.380603	2.73949	4.59188	-1.33938	2.74867	4.44544	2.75545	5.92916	2.27631	3.61525	2.13568	4.85581	0.418505	-5.31446	2.58802	-1.24821	1.67981	-4.07423	5.42145	3.34234	-0.195056	4.40509	-1.64516	4.60034	2.27866	3.45001	3.61705	6.96549	0.784818	1.0199
TCGA-93-A4JP	-0.513877	3.60728	2.52708	5.42543	4.20327	8.37346	2.90302	4.15814	1.81002	2.83342	5.18403	-2.3868	3.44652	3.94566	3.4176	5.11739	3.53031	2.73772	0.582746	0.670804	3.12729	4.70128	-1.36699	2.3737	4.44549	3.01963	5.91725	2.13476	3.96702	2.88294	5.04352	1.32878	-5.27092	3.23791	-1.16304	2.30486	-3.01197	5.29449	3.68763	-0.00146801	4.36866	-1.58854	4.54877	3.11886	3.76808	3.64225	6.77614	1.72312	1.52979
TCGA-55-A4DF	-0.682976	4.53069	1.96193	5.29552	4.32364	7.70123	3.55525	4.17159	1.98638	3.9752	4.77553	-2.14897	3.20969	4.82572	4.57733	5.09708	4.41801	3.30642	-0.0523384	1.13267	2.57158	5.55402	-1.77089	2.48972	4.53889	2.05589	5.72514	1.90747	4.40682	3.435	5.0649	1.30782	-4.71901	2.9128	-0.955655	2.43116	-5.67958	5.5548	3.89875	0.0564773	4.35046	-1.71635	5.3699	3.58225	2.53788	3.94757	6.81164	0.960802	3.70658
TCGA-MP-A4TJ	-0.273762	4.53733	2.96104	5.36962	3.84824	7.9	3.66815	4.30695	1.78312	3.61941	5.01433	-2.76391	3.03188	3.30969	4.15178	4.63582	2.65717	3.20968	-0.422917	0.341368	2.32459	4.94334	-1.34083	2.66422	4.46524	2.19419	5.90263	2.02774	3.8728	2.40877	4.77136	0.0201275	-5.0704	2.64086	-1.23512	1.29171	-5.22491	5.47837	3.4545	-0.171968	4.4878	-1.61677	4.94105	2.27382	3.19577	3.8244	7.08552	0.234252	2.08834
TCGA-91-6831	-0.563297	3.86384	2.50365	5.37209	3.5702	8.51853	4.51091	3.97	2.02051	4.47149	5.06167	-2.37153	2.85565	4.14307	4.33086	4.86466	4.11499	3.63452	-0.157136	0.343957	2.5619	5.19849	-1.44095	3.08718	4.5325	2.04401	5.86301	2.315	4.00978	3.10947	4.91514	1.18989	-4.45679	2.96683	-1.01507	1.56214	-5.20796	5.49159	3.1702	-0.156666	4.18446	-1.55312	5.35054	3.47062	2.69365	3.84006	6.87103	0.305701	3.07453
TCGA-55-8087	-0.378949	4.35286	2.83146	5.4391	4.50786	8.58491	3.35143	4.07836	2.05545	2.25145	5.35873	-2.69866	3.10134	3.87646	4.03033	5.154	3.21125	3.3419	0.407529	0.13689	2.78397	4.9402	-1.09348	1.81674	4.44188	3.02518	5.80604	2.1508	4.26164	3.28284	5.0469	1.65883	-4.25162	2.7357	-1.24065	2.88258	-3.71525	5.36834	3.27373	-0.019527	4.71186	-1.25643	3.95651	3.09397	3.55459	3.81017	6.61734	1.16726	3.06835
TCGA-50-5055	-0.675053	3.38952	3.52343	5.45217	3.36133	7.74318	3.67672	4.2175	1.50378	3.15449	5.25346	-3.63167	3.31492	1.96047	3.80294	4.05713	2.14164	3.11731	-0.940636	-0.52467	2.35795	4.60289	-1.77331	2.63934	4.43203	2.2149	6.00407	0.533682	3.08779	1.31603	4.68746	-0.664696	-6.60473	2.78061	-1.40355	1.16266	-5.71049	5.50879	3.43157	-0.334408	4.01414	-1.85332	4.99947	1.70474	2.78698	3.59722	6.67572	-0.622336	0.0537684
TCGA-73-4659	-0.620201	3.74566	3.1111	5.50696	4.24193	8.54592	3.37842	4.14023	2.07562	3.39078	5.58899	-2.50733	3.51363	2.70222	3.93824	5.55138	3.27854	3.36645	0.0390581	0.13531	2.84122	4.87994	-1.32702	2.94274	4.44348	2.53461	5.97691	2.56284	3.73071	2.49651	4.82475	1.09396	-5.39472	3.836	-1.29294	2.20098	-3.86461	5.63246	3.03303	-0.0751959	4.21052	-1.62994	4.85841	2.90873	3.76546	3.79049	6.68869	0.727706	2.16713
TCGA-44-A47A	-0.633339	4.18243	3.34611	5.38558	4.21708	8.34302	3.80345	4.41649	2.10111	3.76859	5.53253	-2.65926	3.42377	2.58067	4.20469	5.04307	2.31422	3.71599	0.322998	0.833882	2.68748	4.94131	-1.57216	2.35622	4.45084	2.66641	5.92741	2.32571	3.82674	2.44653	4.9997	0.841802	-5.62473	3.01909	-1.23738	2.60745	-3.82437	5.56249	2.99826	-0.0681431	4.31965	-1.60703	4.90704	2.31234	3.75696	3.72654	6.17823	0.8791	2.02638
TCGA-NJ-A4YF	-0.699406	4.20077	3.51624	5.45475	4.6704	8.7186	3.74907	3.80783	2.26848	3.14688	5.55797	-2.37523	3.57187	2.61662	4.70886	5.45153	4.21086	3.43743	0.40402	0.362784	2.55742	5.27984	-1.41368	2.53363	4.48898	2.33436	5.6888	2.22031	4.06295	3.18684	4.94516	2.07034	-5.03589	3.57937	-1.24632	3.90736	-2.30063	5.66001	2.86262	0.0277044	3.97856	-1.62617	5.21772	3.54471	4.94216	3.63327	7.04381	1.90309	4.25682
TCGA-44-7670	-0.644353	3.64194	1.83418	5.38822	4.00065	8.36221	4.24309	4.28251	1.68073	3.7493	5.15377	-2.08364	3.47052	4.04951	3.59243	5.17944	4.3419	4.32203	0.0719122	0.370388	3.41967	4.85296	-1.71211	2.64158	4.49416	2.11231	5.77548	2.42017	4.17671	3.1641	4.95407	1.60773	-4.62331	2.68198	-1.00471	2.45791	-4.02651	5.6312	4.0597	-0.0505201	4.27	-1.37571	5.08648	3.16689	3.13104	3.80313	6.94997	1.0759	1.77707
TCGA-69-7760	-0.898644	3.49792	3.45626	5.57806	4.37201	9.18894	3.36467	4.44506	2.37852	3.12675	5.78804	-2.53418	3.85419	4.12753	4.12066	5.25131	3.06534	3.86444	0.497928	0.704492	2.69929	4.75345	-1.49526	2.31125	4.42344	3.00513	5.90146	1.72579	3.92672	3.12843	4.94767	2.17817	-5.32372	3.0269	-1.09786	2.69031	-3.56647	5.57507	3.71673	0.00377292	4.54529	-1.3866	5.39079	2.68353	3.99492	3.78235	6.51163	0.889657	2.03454
TCGA-78-7159	-0.572221	3.98022	2.92775	5.41542	3.85378	8.66664	3.70515	4.24831	1.83619	3.78667	5.33701	-2.44154	3.17781	4.05064	4.15938	4.93621	3.85186	3.68581	-0.125473	0.333802	2.48839	5.1751	-1.27104	2.37929	4.48984	2.44443	5.81239	1.19112	4.03522	3.2766	4.82669	1.65998	-3.59097	2.91473	-1.09678	1.92904	-4.60588	5.59662	3.00669	-0.0737996	4.4644	-1.47723	5.32437	3.29685	3.14723	3.97288	6.96416	0.573067	3.30098
TCGA-MP-A5C7	-0.566589	3.61462	2.82152	5.41794	4.19977	8.71806	3.12192	4.27343	1.90677	2.6532	5.45265	-2.46847	3.39225	3.69123	3.48346	5.58219	3.65575	3.86068	0.580329	0.660046	2.15584	4.61349	-1.25346	1.98391	4.44847	3.25181	5.83339	2.02109	3.91134	2.97528	5.06075	1.58473	-4.3534	2.72624	-1.13957	3.13126	-2.96825	5.32228	2.81733	0.0356	4.01936	-1.25884	4.78041	3.43812	3.86604	3.96773	6.37905	1.27146	2.78534
TCGA-49-4501	-0.642659	3.06546	3.70774	5.50668	4.22147	8.52981	3.65513	4.23893	1.82803	3.01289	5.63358	-3.08051	3.76153	3.39256	3.95949	4.74665	2.91684	3.24281	0.602571	0.290402	3.35013	4.77593	-1.50272	2.29775	4.40597	2.87161	5.97707	1.91188	3.52235	2.0782	4.90979	0.962214	-5.87896	3.63856	-1.36958	2.48296	-3.51366	5.5765	3.71684	-0.102553	4.17226	-1.59467	4.90975	2.90257	3.62005	3.64392	6.51475	0.840968	0.483886
TCGA-05-4430	-0.839936	3.02516	2.93111	5.53712	3.89524	8.1122	3.3959	4.22625	1.65511	2.99844	5.58667	-3.19407	3.43277	2.65031	3.16557	4.86003	3.09149	3.12787	-0.823988	-0.615093	2.87592	4.64944	-1.70925	2.76303	4.41864	2.30335	6.08138	1.35569	3.55181	2.11239	4.92437	0.321473	-6.33707	3.34421	-1.3347	1.23381	-4.21814	5.53777	3.25376	-0.203962	3.99197	-1.79089	4.91105	2.52719	3.40737	3.52553	6.49055	0.386189	-0.39524
TCGA-78-7153	-0.54918	3.33599	3.45604	5.49592	4.28298	8.70965	3.11303	4.33727	1.97111	2.56387	5.78313	-3.00055	3.62606	2.55199	3.77479	5.36178	3.28924	3.91752	0.456724	0.636514	2.15049	5.10188	-1.32903	2.00692	4.44437	2.81507	5.87377	1.36298	3.59348	2.33171	4.87837	1.14619	-5.32756	3.06901	-1.13171	3.13808	-3.80586	5.72326	3.14949	0.0015364	4.44051	-1.08847	4.78674	2.54998	3.93289	3.7948	6.57377	0.299312	2.08891
TCGA-86-A4P7	-0.318487	4.16266	2.8062	5.39177	3.8396	8.50077	3.72625	4.12779	1.87533	3.25137	5.23465	-2.53265	3.37132	2.73494	3.93054	4.82276	2.38884	3.23023	0.00704931	0.56856	2.94706	4.69491	-1.30731	2.67799	4.44835	3.01929	5.89607	2.5644	3.87419	2.57992	4.97159	1.00469	-5.2403	3.05508	-1.28258	1.99035	-3.70175	5.4398	3.59409	-0.116502	4.45263	-1.57185	4.81963	2.23787	3.72423	3.74258	6.64537	1.05965	1.57997
TCGA-44-2661	-0.406572	4.00965	3.37336	5.49594	3.87967	7.93056	3.43534	4.3731	1.78525	3.29593	5.34004	-3.0689	3.37692	2.63761	4.36589	4.49953	2.14856	3.06239	-0.040136	-0.0154368	2.70974	4.89562	-1.17069	2.41694	4.42768	2.72649	6.01733	1.00598	3.34485	1.92621	4.68879	0.419028	-6.08251	3.35468	-1.29673	1.84367	-4.83605	5.43841	3.32758	-0.244936	4.35993	-1.61136	5.1955	2.14527	3.2857	3.68651	6.69601	0.278558	1.18692
TCGA-50-8457	-0.360764	3.98476	3.15713	5.42448	3.92035	7.86606	3.3138	4.23838	1.3838	2.39677	5.13323	-3.01252	3.07195	3.06586	3.53267	4.62606	2.3311	3.21378	-0.218728	0.167503	2.00454	4.59697	-1.30218	2.28088	4.43193	2.96809	5.84919	1.38009	3.7066	2.29961	4.95692	-0.175723	-5.53171	2.61037	-1.23651	1.89638	-3.89442	5.42481	3.27674	-0.178991	4.4313	-1.49118	4.23402	2.4845	3.44202	3.67977	6.64379	0.448225	1.02039
TCGA-99-8032	-0.334176	3.6678	2.93755	5.40089	3.60294	8.92884	4.30586	3.99933	1.90697	3.28456	5.56286	-2.89893	2.9632	3.02804	3.51253	4.78018	3.5844	4.0234	-0.229782	0.303236	2.58526	4.99315	-1.25811	3.07004	4.49163	2.1474	5.78064	1.94747	3.80773	2.65611	4.75303	0.716809	-4.8084	2.92012	-1.22147	1.50299	-4.3763	5.52212	3.3014	-0.173424	4.51473	-1.50626	4.82945	2.73715	3.73727	3.9249	6.66198	0.395084	2.45931
TCGA-49-AAR2	-0.549937	3.67223	3.23012	5.24098	3.8812	8.03872	3.90713	4.09333	1.72813	3.23465	5.16623	-2.09476	3.56291	2.85424	4.01187	4.99451	2.97863	3.8654	0.0117889	0.888959	2.62327	5.08589	-1.56078	2.28573	4.49842	2.28537	5.65406	2.78141	3.74202	2.06565	4.95975	1.48911	-5.38065	2.65144	-1.18722	3.25276	-4.42215	5.55293	2.9167	0.00226416	4.10203	-1.76816	5.11649	2.81887	3.64674	3.66144	6.65746	0.156775	2.07988
TCGA-55-7910	-0.407772	4.008	2.64386	5.39578	3.94511	8.50629	3.78706	4.11649	2.18658	3.63651	5.21324	-2.55258	3.22466	3.77524	3.95488	5.39391	4.15591	3.70089	0.292551	1.15542	2.1958	5.07493	-1.10595	2.49183	4.50013	2.63446	5.72163	1.30216	3.88524	2.91479	4.85089	0.799534	-4.59843	3.1565	-1.08255	2.49445	-4.28293	5.39241	2.93494	0.00773886	4.42164	-1.56093	5.14302	3.43204	3.40579	4.05291	6.82976	0.828253	3.41903
TCGA-62-A46P	-0.575466	3.45073	3.38906	5.39146	4.31284	9.47743	3.7959	4.22948	2.40217	2.66141	5.69898	-2.59111	3.59942	2.27964	3.96719	5.06366	2.5455	4.2892	0.769084	-0.0051498	2.82593	5.09389	-1.44915	2.04979	4.43358	2.7422	5.77851	1.56903	3.64153	2.18908	4.95668	2.10175	-5.53467	3.18545	-1.30727	3.57372	-3.89473	5.57922	2.96172	0.0086827	4.35313	-1.55331	5.01557	2.7058	4.26728	3.87841	6.78071	0.828772	2.14552
TCGA-67-6217	-0.275956	4.22293	3.33284	5.44337	4.37212	8.25514	3.4339	4.3205	2.15932	3.06528	5.3269	-2.43358	3.54348	3.93226	4.08727	5.27887	3.08242	3.45021	0.591401	0.797787	3.33756	4.69768	-0.969841	2.1516	4.43309	3.23224	5.91476	3.298	4.04429	2.74074	5.04917	1.62119	-4.78533	3.20709	-1.25769	2.62376	-3.24436	5.44052	3.68865	-0.0592405	4.4188	-1.39371	4.70986	2.94681	3.84492	3.83458	6.67341	1.32778	2.39441
TCGA-53-7813	-0.763135	3.86401	2.90887	5.41593	4.05593	8.56868	3.60967	4.47726	2.05216	3.66025	5.21491	-2.49702	3.19715	3.96054	3.85025	5.27263	4.30281	3.39477	0.422202	0.405509	2.2283	5.5128	-1.35581	2.37944	4.48828	2.40891	5.83043	1.57562	4.03696	3.28733	4.77797	0.968807	-4.23563	3.061	-1.0363	2.44068	-4.54836	5.50084	3.24884	-0.018717	4.49726	-1.19474	5.27968	3.40976	3.35935	3.90841	7.01576	0.884044	3.00823
TCGA-67-3772	-0.604431	2.66799	3.63319	5.53882	3.98569	8.27528	3.03511	4.25021	2.06299	3.15315	5.6329	-3.02182	3.77161	3.39226	3.35037	4.96801	2.9308	3.10181	0.165662	0.090769	3.36623	4.75351	-1.18501	2.06933	4.39663	3.4224	6.15229	1.67376	3.2687	1.66302	4.78872	1.04856	-6.42891	3.54923	-1.28106	2.41359	-3.92482	5.45082	3.69282	-0.095844	4.38306	-1.39348	4.86018	2.82215	2.98873	3.8874	6.6037	0.658263	-0.14045
TCGA-64-5779	-0.286638	4.00352	2.32019	5.31894	3.21377	8.56398	4.3317	4.11312	1.44112	3.73584	5.13565	-2.52832	2.85831	4.03941	3.96738	4.55247	3.68579	3.65157	-0.429352	0.45625	2.35448	5.1007	-1.2635	3.19538	4.51616	2.22856	5.79432	1.57324	3.97378	3.06185	4.76963	1.1636	-3.95585	2.51056	-0.959696	1.26529	-5.05609	5.4241	3.65116	-0.175193	4.43478	-1.3962	5.20952	3.38405	3.00956	3.92031	6.92653	0.224787	2.89619
TCGA-55-8507	-0.651011	3.75202	2.67191	5.35645	4.21856	8.62934	3.8926	4.0871	1.87317	3.4505	5.06803	-2.06385	3.26066	4.31393	4.24594	5.3145	3.60343	3.72064	0.318107	0.585653	2.71367	5.10924	-1.67849	2.3982	4.49693	2.26063	5.70794	2.31381	4.09102	3.19845	5.00735	2.11828	-4.64555	2.8201	-1.11174	2.39061	-4.31318	5.60617	2.90027	-0.0161447	4.1279	-1.55187	5.03632	3.35255	3.08162	3.71429	6.77745	0.723236	2.5582
TCGA-55-8097	-0.342426	3.70769	2.65316	5.41416	4.25312	8.8788	3.28065	4.0928	1.43347	2.11825	5.41208	-2.88173	3.33731	3.0304	3.454	5.21057	2.67097	2.95706	-0.0999322	0.1766	2.66822	4.70305	-1.19326	2.19989	4.4331	3.05931	5.90363	1.27502	3.93825	2.654	4.98412	0.851589	-5.1873	2.96352	-1.2626	2.53772	-3.28462	5.42047	3.76323	-0.0800534	4.61658	-1.41602	3.7611	2.74239	3.87968	3.66406	6.54963	0.783337	1.28972
TCGA-05-4249	-0.679377	3.82682	2.71297	5.44937	4.59114	8.02371	3.1831	4.29776	2.12439	2.77202	5.25384	-2.78378	3.17842	3.204	3.38956	5.1691	2.56884	3.40543	-0.418866	-0.330954	2.52684	4.78603	-1.53504	2.0935	4.43376	2.76944	5.90291	1.48464	4.00951	2.75768	4.92663	1.16537	-5.17505	2.82794	-1.28083	2.42967	-4.04994	5.54189	3.43898	-0.0908063	4.43769	-1.39946	4.16247	2.70465	3.00885	3.68115	6.475	0.605826	1.34499
TCGA-64-5774	-0.536178	4.16014	1.85385	5.37501	4.05531	9.02772	4.43563	4.2085	2.16573	3.75653	5.32104	-2.31946	3.322	4.39705	4.78822	4.80695	4.36078	4.56963	0.186028	0.318889	2.50778	5.32649	-1.10842	2.74842	4.53322	2.18125	5.7654	2.12024	4.29774	3.74745	4.92653	1.52496	-3.49492	3.24777	-1.00922	2.21611	-4.47361	5.60145	2.63177	-0.0442403	4.82441	-1.11248	5.43235	3.66989	3.49021	4.08111	7.27752	0.794431	4.30853
TCGA-55-A490	-0.951078	3.83365	3.0571	5.43721	4.90462	8.17052	3.29772	4.02491	1.34179	2.75422	5.3967	-2.7841	3.18658	3.64691	4.0647	5.06899	3.54995	3.90522	-0.249047	0.213229	2.57978	4.69065	-2.09055	2.56836	4.45278	2.31045	5.60021	1.8059	4.04233	3.09756	5.16016	0.854188	-4.93013	2.9213	-1.23185	2.38962	-2.62077	5.9095	3.05442	-0.0461078	4.11395	-1.68961	4.5948	2.93072	3.66142	3.49969	6.84442	0.802208	1.38609
TCGA-44-7669	-0.24669	4.80777	1.5207	5.27687	3.62512	8.1598	4.76742	4.26832	2.33406	4.31671	4.98366	-1.72614	3.13432	4.67009	4.51251	4.85127	4.70354	4.80579	0.260844	0.555155	2.58235	5.24611	-1.14863	3.11984	4.58652	1.49827	5.88519	2.90557	4.6387	4.1313	4.83703	2.22668	-3.43103	2.9157	-0.736927	1.64026	-4.62048	5.47331	3.56768	-0.116815	4.74393	-0.762815	5.13124	3.88123	2.78117	4.28581	6.83792	0.730745	4.59065
TCGA-55-1592	-0.593051	3.9024	2.62449	5.42816	4.37469	8.05526	3.19269	4.24849	1.88739	3.54049	5.13513	-1.98914	3.52725	4.30252	3.9369	5.24141	3.8923	3.04433	0.187542	0.575584	3.33733	4.84332	-1.19186	2.44237	4.46811	3.26107	5.95426	2.42003	4.07406	3.01415	5.01431	2.26081	-4.76959	3.03211	-1.03968	2.6187	-3.45823	5.42109	3.52127	0.00458535	4.2356	-1.49369	5.2222	3.39907	3.39465	3.8092	6.92444	1.38446	1.85862
TCGA-64-1681	-0.55303	3.17144	3.16836	5.46712	4.20691	8.70627	3.51202	4.24567	1.72023	3.12851	5.42366	-2.50368	3.91033	3.8061	3.85382	5.00474	2.77618	3.1905	0.1439	0.416283	3.78972	4.80881	-1.12344	2.26651	4.42357	3.01791	6.03006	2.62669	3.95002	2.3962	5.00422	2.15722	-5.8079	3.04668	-1.35948	2.30234	-3.86375	5.43298	3.69446	-0.0554148	4.42281	-1.64224	4.84631	2.68648	3.13673	3.68374	6.66547	0.918442	0.337164
TCGA-50-5051	-0.719028	3.58107	3.43677	5.43712	3.91583	8.93931	3.48975	4.26918	2.12113	2.89191	5.66321	-2.89433	3.60261	2.79642	3.39804	5.36555	3.09311	3.88587	0.659575	0.213731	2.26673	5.09535	-1.37202	2.65638	4.45966	2.33002	5.89834	2.08137	3.73961	2.42109	4.85364	0.61619	-5.6281	3.38042	-1.33179	2.57769	-3.68032	5.48761	2.68752	-0.0226435	4.26114	-1.56126	5.01841	2.81471	4.30165	3.86476	6.62775	0.842418	2.47547
TCGA-44-A479	-0.31541	4.30331	2.39393	5.34581	3.58225	7.85332	3.79491	4.19447	1.58033	4.06859	5.04667	-2.5818	2.85573	4.05306	3.83439	4.76771	3.38373	3.18636	-0.247812	0.498701	2.47412	4.93584	-1.11198	2.94144	4.49338	2.22894	5.82769	2.21754	3.95987	2.69618	4.64889	0.736633	-4.23072	2.40687	-1.06841	1.53243	-5.42156	5.37105	3.57172	-0.172168	4.45347	-1.50757	5.1819	2.92331	2.9115	3.84543	7.02706	0.406349	2.70916
TCGA-50-8460	-0.68392	3.43364	3.4048	5.43802	3.82292	8.08133	3.19224	4.16371	1.31037	2.80687	5.55926	-3.03338	3.3833	2.59349	3.51409	5.00366	2.43389	3.36549	-0.798438	-0.00713742	2.62071	4.44818	-1.51403	2.47904	4.41271	2.85815	5.92946	2.10036	3.50799	1.99481	5.01075	0.683507	-6.30345	2.80039	-1.35823	1.80946	-4.04299	5.51978	2.75503	-0.185039	4.27418	-1.79897	4.59944	2.23096	3.11769	3.5679	6.47649	0.11998	0.311839
TCGA-91-8496	-0.617277	3.48049	3.73659	5.5332	4.24485	8.71465	3.08843	4.24233	2.12204	2.55185	5.54279	-3.28585	3.9228	2.57077	4.45203	5.10225	2.24811	3.84525	0.73549	0.411396	2.92284	4.79478	-1.37666	1.88313	4.40124	3.01773	6.07662	1.11775	3.34122	1.95871	4.90219	1.38057	-6.59949	3.63094	-1.33232	3.11017	-3.69977	5.58951	2.729	-0.116346	4.3518	-1.3803	4.96883	2.79591	3.3625	3.8098	6.22291	0.586931	1.28632
TCGA-97-8172	-0.264142	4.15271	2.64479	5.39065	4.17953	8.16414	3.49332	4.14341	1.35467	2.62456	5.21338	-2.76396	3.04468	3.17848	3.50747	5.0378	2.68984	3.21069	-0.182042	0.205752	2.27705	4.88309	-1.11764	2.50961	4.44783	3.32612	5.87057	1.92331	3.83271	2.51515	4.94537	0.19085	-4.75302	2.80145	-1.16096	1.95854	-3.51084	5.37941	3.58929	-0.121723	4.58147	-1.4703	4.28719	2.65579	3.67134	3.62812	6.70805	0.935745	1.80012
TCGA-95-A4VP	-0.465582	3.42455	3.03155	5.36727	3.27676	8.7821	4.08109	4.01158	1.53125	2.77329	5.65526	-2.8023	3.25118	1.89231	3.42332	4.84621	2.79471	3.84349	-0.204306	0.103757	2.92697	4.73278	-1.40391	2.96195	4.46836	2.17855	5.91393	2.22582	3.57196	1.93833	4.89623	0.83819	-5.91788	3.19276	-1.39311	1.7077	-4.07498	5.51341	3.10423	-0.151086	4.43144	-1.75131	4.72448	2.54284	3.81555	3.70872	6.86902	0.259214	1.31477
TCGA-93-7347	-0.605869	3.33921	3.31065	5.44881	4.31572	8.33777	3.22419	4.36353	1.33862	2.65261	5.51563	-3.30688	3.3608	2.3211	3.34689	4.82683	2.13881	2.94095	-0.76616	0.0719452	2.44546	4.50165	-1.6677	2.45376	4.41229	2.86629	5.9874	0.565188	3.43353	1.7082	4.85739	-0.32466	-6.18383	2.83033	-1.32866	1.79957	-3.80146	5.55718	3.99143	-0.16024	4.09354	-1.7766	4.61652	1.94537	3.66073	3.52956	6.45697	0.332482	-0.0281917
TCGA-91-8497	-0.0359677	4.44148	2.78836	5.343	4.13678	8.47953	3.69918	4.12823	1.62459	2.61252	5.29158	-2.72098	3.09333	2.79279	3.75017	5.02463	2.46974	3.72118	-0.349727	0.590401	2.47433	4.83765	-1.09317	2.94245	4.45802	3.10088	5.83087	2.74108	3.8187	2.31332	4.83087	0.0167071	-4.90211	2.93944	-1.23733	2.37592	-3.49569	5.29311	3.61583	-0.143592	4.69173	-1.3807	4.62904	2.37571	3.94602	3.86604	6.85183	0.762992	2.62358
TCGA-55-7573	-0.438408	3.97572	2.95338	5.39972	3.82248	7.86198	3.28215	4.2201	1.57829	3.16571	5.16413	-2.68267	3.16001	3.98552	3.47376	4.95742	2.95398	2.99236	-0.0242014	0.274828	2.97877	4.60529	-1.39018	2.19552	4.4401	3.02662	5.94786	2.31469	4.05459	2.85123	5.02072	1.35143	-4.57934	2.81275	-1.21618	2.24237	-3.69066	5.38696	3.43068	-0.101753	4.52248	-1.49897	4.40982	2.86003	3.19794	3.83729	6.74132	1.09635	1.14153
TCGA-62-A470	-0.385302	4.04575	3.13518	5.41432	4.00992	8.14221	3.42527	4.311	2.14136	3.44109	5.28633	-2.07792	3.38556	3.69386	3.95944	5.36004	3.41071	3.8815	0.947698	0.343977	2.52634	5.02915	-1.17577	1.86717	4.47175	2.53467	5.80923	2.30405	3.85522	2.82944	4.821	1.46219	-4.69719	2.98716	-1.05117	2.62768	-3.99958	5.58682	3.02259	0.00802904	4.62806	-0.965467	4.92405	3.1979	3.72504	3.98411	6.8006	0.463685	3.54927
TCGA-86-8056	-0.291745	4.2928	2.86716	5.46225	4.59662	8.61301	3.17135	4.48926	1.88382	2.94618	5.5307	-2.44625	3.54835	3.71203	4.22736	5.2043	2.74803	3.07439	0.3595	0.619915	2.77606	4.64841	-1.19676	2.31584	4.42006	3.35386	5.98394	1.35129	4.17746	3.06096	4.91355	1.21382	-4.46071	2.98627	-1.13696	2.69041	-3.04197	5.45221	4.35814	-0.0187431	4.61633	-1.24153	4.31243	2.5294	3.77623	3.83487	6.67704	1.23209	2.25854
TCGA-NJ-A55R	-0.0184604	4.48771	2.13746	5.29869	4.18321	8.85732	4.39482	4.04937	2.13993	3.4246	5.51511	-2.05504	3.16298	3.58954	4.03544	5.23038	3.57677	4.63609	0.284141	0.549866	3.26995	5.26913	-0.647454	3.13949	4.50957	2.53265	5.7695	4.41367	4.49435	3.25064	4.90084	0.705769	-4.00079	3.36826	-1.06467	2.24892	-2.32498	5.43386	3.31115	-0.0187983	4.8343	-1.14386	4.59231	2.95755	4.35084	4.09448	7.03619	1.56665	3.43064
TCGA-86-A4D0	-0.547349	3.96912	2.47694	5.37478	3.88644	8.34453	3.76796	4.15828	2.27147	3.78365	5.39221	-2.38762	3.28978	3.51641	3.93564	5.31363	4.53201	4.51424	0.280509	0.675182	2.50028	5.25933	-1.41248	2.9313	4.54147	1.78553	5.7572	2.40205	4.08587	3.38756	4.8193	1.80354	-4.45313	3.14794	-0.863955	2.31598	-4.40638	5.76247	3.27307	-0.00763979	4.3181	-0.897832	5.6819	3.7281	3.57432	4.06859	6.5921	0.44567	4.57007
TCGA-97-8171	-0.358878	4.53166	3.30361	5.40033	4.4386	8.22772	3.62006	4.4284	2.50327	2.28712	5.1297	-2.74221	3.36088	3.30737	5.27855	5.14232	3.60848	4.27138	0.530962	1.09329	1.74368	5.09256	-0.909408	1.51592	4.47352	2.52846	5.75226	1.25718	4.07467	3.55083	5.12336	1.9483	-3.80475	2.65752	-0.982028	3.44551	-4.41532	5.71707	2.49902	0.00456612	4.58977	-0.749642	4.69186	3.38474	2.90624	4.04674	6.22598	0.465725	4.98276
TCGA-50-5942	-0.466897	3.27188	2.79472	5.47886	4.18445	8.25138	2.93988	4.17396	1.21894	1.90094	5.36289	-3.06185	3.20092	3.56597	3.05073	5.00305	2.60587	2.84262	-0.139697	0.243557	1.67711	4.43309	-1.41703	1.96082	4.41463	3.36603	5.96109	1.01192	3.58967	2.26453	4.87982	0.369208	-5.03159	2.63743	-1.17071	2.14638	-3.80411	5.43986	3.47863	-0.10777	4.5416	-1.3284	3.87267	2.51342	3.40359	3.66671	6.40179	0.678733	0.583272
TCGA-97-A4M1	-0.231139	3.9229	2.83368	5.39942	3.78859	8.81241	3.40386	4.02554	1.6011	2.55013	5.20717	-2.54196	3.38642	3.39199	3.87963	5.19024	2.80295	3.64381	0.822934	0.443208	3.60113	4.75275	-1.27088	2.4161	4.44911	3.06246	5.79198	2.97897	3.85523	2.557	5.07683	1.74649	-5.41215	3.31081	-1.27317	2.81582	-3.42541	5.33265	3.01718	-0.0861402	4.43313	-1.53319	4.76132	2.95365	3.90904	3.68582	6.69524	1.13479	1.63628
TCGA-44-A47B	-0.778549	4.04992	2.9507	5.42496	4.51227	8.84041	3.40192	4.25317	1.70492	3.00659	5.40211	-2.83739	3.34441	4.19883	4.03816	5.34995	2.98704	3.95026	0.572454	0.263006	2.45717	4.86142	-1.58631	2.27615	4.44399	2.72118	5.77334	1.07169	4.14544	3.20702	4.90794	1.45617	-4.57969	2.90684	-1.19401	2.71365	-3.66284	5.54783	3.07637	0.00295766	4.63292	-1.562	4.47578	3.07067	3.77384	3.741	6.73377	0.792306	2.38711
TCGA-55-8206	-0.229307	4.32452	2.70291	5.44502	4.22608	8.16284	3.19985	4.23119	1.52215	2.80583	5.15813	-2.68476	3.36347	3.39188	4.04591	5.30056	2.64559	2.94378	0.219638	0.684411	2.56071	4.8504	-1.02329	2.62096	4.4414	3.2452	5.8483	2.82647	4.00003	2.71541	4.95441	1.14026	-4.73074	2.76048	-1.23629	2.65011	-3.38406	5.39838	3.17295	-0.106138	4.6348	-1.48141	4.63723	2.69629	3.64642	3.74621	6.85449	1.01688	2.22855
TCGA-50-6597	-0.788767	2.63783	3.45658	5.46706	4.64295	9.56643	3.50168	4.26037	2.13616	3.35016	5.83162	-2.96148	3.84524	3.77709	3.65819	5.10447	3.09778	3.89043	1.06494	-0.341072	4.39343	4.90827	-1.4518	2.25915	4.40701	2.96843	5.95179	3.288	3.66684	2.07486	4.93824	1.54102	-6.3356	3.50653	-1.48906	2.62188	-3.52684	5.4243	4.01775	0.000672475	4.17439	-1.74501	5.41758	2.62165	4.06975	3.3726	6.54146	1.66703	0.2777
TCGA-97-8177	-0.469287	3.4225	3.1162	5.4656	4.07251	8.12967	3.71818	4.09137	1.88495	3.27497	5.39433	-2.8772	3.45381	2.65908	3.6609	4.70544	2.51121	3.44967	0.195698	0.0855187	3.2409	4.7107	-1.31666	2.53088	4.42161	2.8862	5.95826	2.36459	3.48287	1.94074	4.88699	1.13124	-6.55209	3.40197	-1.26487	2.13455	-3.82257	5.48035	3.58853	-0.160023	4.36096	-1.60279	4.99153	2.34006	3.27007	3.64304	6.79022	0.750955	0.509759
TCGA-97-8552	-0.184312	4.43617	2.98285	5.39164	4.0264	8.32081	3.35923	4.02758	1.56629	2.75906	5.31594	-2.6374	3.47963	3.36167	4.18227	4.87939	2.26772	3.2811	0.157855	0.419718	3.04487	4.78801	-1.18347	2.10177	4.43999	2.92519	5.89261	3.078	3.92687	2.41725	4.92686	1.09382	-5.37104	2.5981	-1.31299	2.50383	-3.52087	5.29039	3.05635	-0.104609	4.65758	-1.46359	4.63787	2.45737	4.02012	3.73487	6.91696	0.941028	2.11809
TCGA-69-7973	-0.464022	4.25009	2.20329	5.39207	3.96107	9.00655	3.92251	4.1998	1.99864	3.70073	5.37391	-1.99181	3.21359	3.93465	4.07022	5.2377	4.10796	4.3609	0.302864	0.536628	2.74429	5.15039	-1.16016	2.82258	4.50619	2.78351	5.85965	2.76629	4.21501	3.37696	4.90793	1.58915	-4.22842	3.39745	-0.93219	2.31694	-4.3426	5.42767	2.98451	-0.0171826	4.74195	-1.17291	5.37254	3.52111	3.36013	4.08444	6.86055	0.969795	3.61421
TCGA-55-7281	-0.782982	3.10653	3.18476	5.50236	4.35437	8.27446	3.501	4.32514	1.70691	2.84503	5.59553	-3.22758	3.74185	2.74841	3.60071	4.84357	1.8174	3.75377	-0.25693	0.144646	3.08701	4.43941	-1.69326	1.9077	4.41266	2.56709	6.03806	0.882924	3.64474	2.04885	4.95323	0.997181	-6.33197	2.5515	-1.41475	2.00736	-3.87574	5.68482	3.343	-0.115867	4.07399	-1.82492	4.48626	2.1269	3.35619	3.49153	6.60617	0.350897	-0.51542
TCGA-50-5935	-0.611156	3.63091	3.11486	5.48873	4.47475	8.49725	3.27685	4.38729	2.00507	2.8943	5.49396	-2.63264	3.51982	3.98311	3.30509	5.20426	3.41852	3.26402	0.512326	0.0270509	2.70643	5.02768	-1.0355	2.39012	4.43409	2.96278	5.88774	2.76507	3.8934	2.61695	4.97772	0.718134	-5.34392	3.01091	-1.23566	2.42887	-3.34082	5.34503	3.48566	-0.0515376	4.53743	-1.46616	5.03231	3.01777	3.66149	3.75841	6.5621	1.33202	1.23475
TCGA-97-A4M7	-0.354898	3.99829	2.74809	5.37254	3.75319	8.20024	3.27769	4.18236	1.60018	2.90778	5.34818	-2.7926	3.10852	3.16479	3.37019	5.00018	2.09361	3.28547	-0.2989	0.41797	2.67481	4.57132	-1.33209	2.7023	4.4408	2.85468	5.86998	2.4548	3.86752	2.17753	4.94804	0.332751	-5.61155	2.87286	-1.27178	1.94959	-4.03833	5.37578	3.68732	-0.112695	4.65986	-1.76357	4.74627	2.25517	3.4889	3.83916	6.59612	0.442598	0.745263
TCGA-78-7536	-0.903271	4.45567	2.27639	5.39797	4.61764	8.37522	3.56208	4.31053	2.48938	3.6557	4.89318	-2.13381	3.50364	3.65475	5.0504	5.53993	4.12218	3.82408	0.655543	1.02274	2.30564	5.48536	-1.72663	2.11901	4.54605	2.09941	5.84517	1.37567	4.26049	3.64468	4.96766	1.9374	-4.10051	3.39107	-0.903695	3.329	-4.74975	5.69864	2.94159	0.0690841	4.3984	-1.24191	5.62431	3.72997	3.04524	3.91314	7.12131	1.21258	4.49485
TCGA-78-7539	-0.544471	3.74989	3.55384	5.4542	4.88002	8.33955	3.57539	4.66009	2.09108	2.80748	5.57125	-3.0752	3.65464	3.68895	4.25727	5.25424	2.93664	3.85292	0.471964	0.7367	2.95633	4.81045	-1.39022	2.18823	4.4304	3.22597	5.91463	1.83273	3.92174	2.71535	4.98341	1.12711	-5.03497	2.9486	-1.29911	2.83837	-3.66262	5.54182	3.54636	-0.0668951	4.28928	-1.46184	5.10292	2.76165	3.75034	3.60961	6.82318	0.925068	2.36002
TCGA-53-A4EZ	-0.631269	4.34898	2.94084	5.34459	4.70192	9.05286	3.83329	4.30867	2.04175	3.06512	5.44082	-2.40106	3.7473	3.94007	4.88597	5.67554	4.14887	4.28539	1.38963	1.83804	3.30014	5.10329	-1.68609	2.79063	4.5092	2.5328	5.79087	2.10526	4.38426	3.36379	5.15208	2.11393	-4.07754	3.58899	-1.17971	3.8835	-3.06163	5.76887	3.26773	0.127361	4.33192	-1.29455	5.50015	3.85907	3.47864	4.0183	6.49509	1.64339	3.56061
TCGA-91-6828	-0.424882	4.3162	2.72028	5.44859	4.5253	8.64557	3.14442	4.46924	1.77662	3.12959	5.45538	-2.42676	3.41553	3.40391	3.95245	5.54999	3.1664	3.4326	0.327027	0.626271	2.4632	5.04337	-0.98873	2.88514	4.45321	3.01328	5.89271	1.78159	4.13195	3.16625	4.79762	1.29625	-3.97401	3.06856	-1.05041	2.26329	-3.94637	5.58277	3.88794	-0.0223539	4.73231	-1.36764	4.83848	2.74328	3.66927	3.79083	7.05883	0.838275	3.01795
TCGA-55-7815	-0.506617	3.96429	2.87518	5.61916	4.2875	8.38168	3.13792	4.7152	1.87208	4.06819	5.44786	-2.71923	3.17281	4.61926	3.87449	5.30752	4.01696	3.35514	0.549184	0.388145	1.98293	5.0513	-0.807253	2.83037	4.43634	3.02414	6.05138	1.15476	4.08046	3.49081	4.5212	0.55392	-3.25743	3.20367	-0.982632	1.63267	-4.52711	5.54646	3.54301	-0.15411	4.60212	-0.973514	5.26721	2.8104	2.6457	4.04845	6.62464	0.838006	2.90594
TCGA-86-8669	-0.453577	4.31287	3.53933	5.46772	4.74729	8.92258	3.34076	4.41873	1.94494	3.00705	5.80036	-2.33132	3.3693	3.54744	4.03197	5.73476	3.62022	3.65203	0.368704	0.690178	2.807	4.80038	-1.22835	3.05671	4.44039	2.97574	5.80301	2.20668	4.07637	2.87767	4.83627	1.59571	-4.66405	3.22967	-1.15205	3.33767	-3.38624	5.62684	3.74445	-0.0165314	4.62369	-1.44448	4.99167	3.44125	4.18947	3.80496	6.91741	0.790943	3.67096
[truncated: 89 more columns]

## Sheet: Tables S4
Table S4_Correlation of JMJD2D with IC50
gene	Drug	cor	p.value	Relevance
JMJD2D	BMS.708163	0.309704	5.38e-12	Positive
JMJD2D	Roscovitine	0.269723	2.3e-09	Positive
JMJD2D	Pyrimethamine	0.238903	1.32e-07	Positive
JMJD2D	AZ628	0.184056	5.22e-05	Positive
JMJD2D	Bicalutamide	0.182679	5.95e-05	Positive
JMJD2D	PD.0325901	0.177894	9.29e-05	Positive
JMJD2D	RDEA119	0.164478	0.000305656	Positive
JMJD2D	JNK.9L	0.157507	0.000548402	Positive
JMJD2D	BMS.536924	0.155882	0.000626354	Positive
JMJD2D	KU.55933	-0.154852	0.000680996	Negative
JMJD2D	AP.24534	-0.157219	0.000561528	Negative
JMJD2D	IPA.3	-0.15962	0.000460512	Negative
JMJD2D	Lenalidomide	-0.159879	0.000450672	Negative
JMJD2D	ABT.263	-0.16077	0.000418349	Negative
JMJD2D	CMK	-0.17593	0.000111192	Negative
JMJD2D	SL.0101.1	-0.176775	0.000102939	Negative
JMJD2D	Pazopanib	-0.186681	4.06e-05	Negative
JMJD2D	ATRA	-0.206339	5.54e-06	Negative
JMJD2D	Bosutinib	-0.212527	2.84e-06	Negative
JMJD2D	JNK.Inhibitor.VIII	-0.29268	7.97e-11	Negative

## Sheet: Tables S5
Table S5 DEGs between Tumor and Normal in TCGA-LUAD cohort.
	logFC	AveExpr	t	P.Value	adj.P.Val	B
PYCR1	1.34807	7.36833	27.1947	2.42752e-106	5.6969e-102	231.863
FREM3	-3.19557	1.11644	-25.6766	2.4894e-98	2.92106e-94	213.531
TOP2A	1.73368	6.88522	24.3135	4.09366e-91	3.20234e-87	197.015
COL10A1	2.77697	6.50263	24.0791	7.13586e-90	4.18661e-86	194.174
TEDC2	2.46772	5.42426	23.9088	5.69607e-89	2.67351e-85	192.109
SAPCD2	2.33536	5.90492	23.6804	9.22074e-88	3.60654e-84	189.341
ANGPT4	-3.49827	2.24226	-23.6631	1.1389e-87	3.81825e-84	189.131
KCNA4	-3.54584	1.4866	-23.3121	8.21336e-86	2.40939e-82	184.878
SSTR4	-2.04003	0.500314	-23.2847	1.14676e-85	2.99025e-82	184.546
RS1	-3.636	2.26176	-23.2132	2.74328e-85	6.43792e-82	183.679
ADM2	2.29207	5.89931	23.1174	8.80672e-85	1.87887e-81	182.519
SERTM1	-4.83547	2.09152	-23.0576	1.82433e-84	3.56778e-81	181.795
CYP1A2	-3.37379	1.16238	-22.966	5.56789e-84	1.00513e-80	180.686
OR6K3	-2.65218	0.690129	-22.6452	2.76576e-82	4.63621e-79	176.803
CTHRC1	1.56747	7.22386	22.547	9.12715e-82	1.42797e-78	175.616
FAM83A-AS1	4.16947	4.89676	22.5357	1.04721e-81	1.53599e-78	175.479
SH3GL3	-4.09806	1.95329	-22.5219	1.23862e-81	1.70988e-78	175.312
CHRM2	-2.70622	0.882343	-22.2202	4.85092e-80	6.32452e-77	171.666
BUB1B	2.19574	5.75142	22.1396	1.29101e-79	1.5946e-76	170.692
ADCY8	-3.65533	1.22557	-22.0578	3.48827e-79	4.09314e-76	169.704
UHRF1	2.23452	5.68121	22.0521	3.73712e-79	4.17633e-76	169.636
CDC20	1.78803	6.79417	22.0174	5.69554e-79	6.07559e-76	169.217
MYOC	-3.92619	2.03014	-21.9853	8.40569e-79	8.57673e-76	168.83
E2F8	2.343	5.29659	21.9103	2.08904e-78	2.04274e-75	167.925
KIF4A	2.40087	5.86226	21.9041	2.25267e-78	2.11463e-75	167.85
PLK1	1.86184	6.16395	21.8706	3.38184e-78	3.0525e-75	167.446
TMEM177	0.886904	6.33631	21.8554	4.06674e-78	3.53475e-75	167.262
MND1	2.03687	5.47431	21.7729	1.10545e-77	9.26521e-75	166.268
SLC6A4	-4.65379	2.91393	-21.7685	1.16613e-77	9.43677e-75	166.215
PPP1R14B-AS1	2.53412	5.41356	21.7	2.67518e-77	2.09271e-74	165.389
KIF20A	1.9007	6.10964	21.6968	2.78348e-77	2.10718e-74	165.35
PACRG-AS3	-2.25206	0.638361	-21.4353	6.60728e-76	4.84561e-73	162.201
ORC6	2.13311	5.27494	21.4252	7.46244e-76	5.17842e-73	162.08
DLGAP5	2.29595	5.90528	21.4248	7.5024e-76	5.17842e-73	162.075
ANLN	2.02353	6.29186	21.1846	1.37011e-74	9.18675e-72	159.187
RMI2	1.27139	6.37064	21.1796	1.45512e-74	9.48573e-72	159.127
CDCA8	1.56784	6.4575	21.1739	1.55835e-74	9.88413e-72	159.059
EFNA3	1.86091	5.74561	21.1346	2.50534e-74	1.54725e-71	158.586
C10orf67	-3.70411	2.22469	-21.1129	3.2567e-74	1.9597e-71	158.326
GPT2	1.49697	6.59469	20.9194	3.36631e-73	1.97502e-70	156.003
TUBB3	3.35952	4.90695	20.8983	4.34236e-73	2.48552e-70	155.75
NUF2	2.29909	5.75008	20.8557	7.25918e-73	4.05615e-70	155.239
TMEM184A	1.7958	6.2512	20.8437	8.39275e-73	4.58049e-70	155.095
SFXN1	0.71784	6.59386	20.829	1.00169e-72	5.34268e-70	154.919
SRPK1	0.598632	7.03024	20.7957	1.49608e-72	7.80223e-70	154.52
GINS1	1.80396	5.92031	20.7787	1.83698e-72	9.37178e-70	154.316
OTX1	2.75917	4.75852	20.6738	6.50184e-72	3.24649e-69	153.059
ERCC6L	2.34671	4.72757	20.5746	2.14706e-71	1.03778e-68	151.872
B3GNT3	2.23469	6.78787	20.5738	2.16684e-71	1.03778e-68	151.863
PPAT	1.06929	6.17619	20.5705	2.25463e-71	1.05823e-68	151.823
EPAS1	-0.616633	7.68078	-20.553	2.78187e-71	1.2801e-68	151.614
CDC6	2.03233	5.91845	20.4218	1.34741e-70	6.08095e-68	150.046
KIF26B	2.07583	5.77043	20.3642	2.69413e-70	1.19294e-67	149.357
CACNA1S	-2.36563	0.868169	-20.3185	4.66356e-70	2.02675e-67	148.811
CENPF	2.03588	5.95911	20.3046	5.5057e-70	2.34923e-67	148.646
CMTM5	-2.08595	1.17205	-20.2992	5.87865e-70	2.46358e-67	148.581
TPX2	1.63026	6.75444	20.2922	6.39006e-70	2.63091e-67	148.498
UBE2C	1.67845	6.99962	20.2003	1.92533e-69	7.79027e-67	147.401
CCNB2	1.60928	6.37375	20.1793	2.47773e-69	9.8555e-67	147.151
RGCC	-0.697973	7.59747	-20.1609	3.08853e-69	1.20803e-66	146.931
OVCH1	-3.37497	1.94215	-20.0653	9.71715e-69	3.7384e-66	145.792
STX1A	1.67259	6.06519	20.0071	1.95111e-68	7.38527e-66	145.099
MELK	2.14331	5.99102	19.9901	2.39011e-68	8.90336e-66	144.897
DEPDC1B	2.44838	5.21939	19.9745	2.88095e-68	1.05641e-65	144.711
BIRC5	1.91062	6.49175	19.9693	3.06648e-68	1.10714e-65	144.649
ASPM	2.48905	5.20153	19.925	5.21183e-68	1.8532e-65	144.122
PVT1	1.7383	5.67513	19.8797	8.96271e-68	3.13936e-65	143.583
ARHGEF39	1.75604	4.9363	19.8369	1.49553e-67	5.16135e-65	143.074
MYO19	0.922431	6.20114	19.8015	2.28336e-67	7.76607e-65	142.653
KIF18B	2.50255	5.43807	19.7199	6.0498e-67	2.02824e-64	141.684
RASAL1	2.83894	5.15009	19.7069	7.06056e-67	2.33376e-64	141.531
OTC	-3.20936	1.48808	-19.568	3.70271e-66	1.20688e-63	139.883
RAD54L	2.21857	5.25615	19.3561	4.61962e-65	1.48511e-62	137.374
CDCA3	2.11667	5.29965	19.3483	5.06912e-65	1.6076e-62	137.282
TNR	-2.81194	1.51424	-19.2477	1.6744e-64	5.23932e-62	136.094
GYPE	-2.83199	3.25084	-19.2303	2.05998e-64	6.36099e-62	135.888
TAL1	-2.04015	4.25899	-19.2218	2.27849e-64	6.94435e-62	135.787
MYBL2	1.89391	6.71911	19.2167	2.42013e-64	7.2815e-62	135.728
IGSF9	2.1455	5.90034	19.1913	3.27289e-64	9.72256e-62	135.427
CCNB1	1.18912	6.9035	19.1775	3.85372e-64	1.13049e-61	135.265
DEPDC1	2.61085	5.05785	19.1541	5.08921e-64	1.47449e-61	134.989
SCUBE1	-3.02847	3.49843	-19.1269	7.02557e-64	2.01068e-61	134.668
RECQL4	1.59322	6.2303	19.1079	8.8037e-64	2.48922e-61	134.444
PTPN5	-2.49835	1.47569	-19.0938	1.04051e-63	2.90698e-61	134.278
SGO1	2.35643	4.79711	19.0205	2.48033e-63	6.84805e-61	133.414
LANCL1-AS1	-3.08649	3.57177	-18.9864	3.71412e-63	1.0077e-60	133.012
C20orf202	-2.12522	3.32787	-18.9859	3.73571e-63	1.0077e-60	133.007
NUSAP1	1.171	6.70855	18.923	7.86322e-63	2.09698e-60	132.267
LDB2	-1.22956	6.10503	-18.8408	2.07919e-62	5.48251e-60	131.3
CCM2L	-1.59281	5.17958	-18.8063	3.12468e-62	8.14777e-60	130.895
GINS2	1.71078	5.87529	18.7827	4.13149e-62	1.06547e-59	130.617
SPTBN2	1.3865	6.36923	18.7686	4.87758e-62	1.24421e-59	130.452
NDC80	1.91703	5.73143	18.7307	7.63002e-62	1.92539e-59	130.008
USHBP1	-1.67549	4.40777	-18.6906	1.22444e-61	3.05694e-59	129.537
INMT-MINDY4	-2.21359	1.03033	-18.5903	3.99624e-61	9.87198e-59	128.361
CTXND1	-3.22768	2.62731	-18.5282	8.29538e-61	2.02788e-58	127.635
WNT3A	-3.70884	3.14263	-18.5106	1.02129e-60	2.47004e-58	127.429
CENPA	2.30971	5.57383	18.5097	1.03146e-60	2.47004e-58	127.419
CCNA2	1.47145	6.38742	18.4875	1.33955e-60	3.17541e-58	127.159
MKI67	1.73493	6.19545	18.427	2.72859e-60	6.40345e-58	126.452
CCNE1	1.90659	5.69709	18.426	2.76174e-60	6.41707e-58	126.44
JPH4	-2.26966	3.32256	-18.4162	3.09613e-60	7.12352e-58	126.326
LGR4	1.22026	6.7582	18.4102	3.32521e-60	7.57631e-58	126.255
CDH5	-0.941672	6.76632	-18.3805	4.71362e-60	1.06365e-57	125.908
EFNA4	0.853077	7.03115	18.3663	5.56754e-60	1.24437e-57	125.743
NLN	0.814783	6.18911	18.3448	7.16022e-60	1.58525e-57	125.493
JAM2	-1.37364	5.73635	-18.344	7.22928e-60	1.58558e-57	125.483
RNU6-967P	-2.99543	0.597698	-18.2924	1.32543e-59	2.8801e-57	124.881
CCDC141	-2.86201	2.23054	-18.2908	1.34943e-59	2.90535e-57	124.863
SPC24	1.66369	5.76437	18.2783	1.56288e-59	3.33433e-57	124.717
PCARE	-2.61222	1.23577	-18.2555	2.04127e-59	4.31573e-57	124.451
CLEC1A	-1.49296	5.0545	-18.2231	2.9852e-59	6.25506e-57	124.073
MSTO1	0.79816	6.20985	18.2206	3.07524e-59	6.38671e-57	124.044
FRMD5	2.72936	4.67544	18.2194	3.11797e-59	6.41864e-57	124.03
PCDH15	-2.65749	1.33407	-18.194	4.19649e-59	8.56376e-57	123.735
SLC6A13	-2.57853	1.8706	-18.1811	4.88375e-59	9.88034e-57	123.584
EMP2	-0.753943	7.42585	-18.1297	8.91031e-59	1.78724e-56	122.986
C10orf88B	2.67298	4.21499	18.1247	9.44785e-59	1.879e-56	122.928
GCOM1	-2.26956	1.83647	-17.9466	7.57015e-58	1.49291e-55	120.859
LIN7A	-2.13369	4.36452	-17.9263	9.5923e-58	1.87593e-55	120.624
NME1	0.850068	7.08332	17.9154	1.0881e-57	2.11037e-55	120.499
CKAP2L	2.08527	5.30573	17.914	1.10615e-57	2.1278e-55	120.482
TMPRSS4	2.80552	6.25818	17.8841	1.56887e-57	2.99335e-55	120.135
FAM111B	1.72649	5.75444	17.8819	1.60942e-57	3.04596e-55	120.11
PRC1	1.26837	6.33638	17.8661	1.93368e-57	3.63037e-55	119.927
RAB26	2.39284	4.83195	17.8639	1.98332e-57	3.69401e-55	119.902
GRK5	-1.22232	6.12166	-17.847	2.41515e-57	4.46289e-55	119.706
ROBO4	-1.32701	6.08353	-17.8132	3.58153e-57	6.56651e-55	119.315
C1orf74	0.847699	5.3595	17.7846	4.99257e-57	9.02613e-55	118.984
NOVA2	-1.80309	4.28112	-17.7845	4.99999e-57	9.02613e-55	118.983
TTK	2.12172	5.35341	17.7712	5.83707e-57	1.04568e-54	118.829
NEIL3	2.70963	4.68968	17.7624	6.46847e-57	1.15002e-54	118.727
CDCA2	2.07521	5.06465	17.759	6.73123e-57	1.18773e-54	118.687
PBK	2.06147	5.8269	17.7564	6.93381e-57	1.21435e-54	118.658
SLC2A1	1.16218	7.17971	17.7416	8.23404e-57	1.43138e-54	118.487
RSPO1	-3.09407	3.05404	-17.7406	8.33491e-57	1.43275e-54	118.475
CAV3	-2.75648	1.41305	-17.7403	8.36402e-57	1.43275e-54	118.472
STX11	-1.36525	6.23697	-17.7299	9.43819e-57	1.60504e-54	118.351
CDCA5	1.604	6.19624	17.695	1.41548e-56	2.38981e-54	117.949
HSPA12B	-1.44575	5.71858	-17.6885	1.52649e-56	2.55884e-54	117.873
CAV1	-1.01187	7.36683	-17.6583	2.16865e-56	3.60949e-54	117.524
AGBL1	-2.78029	1.21912	-17.651	2.35907e-56	3.89878e-54	117.441
ORC1	1.77544	5.49066	17.5942	4.56275e-56	7.48802e-54	116.785
CHAF1B	1.14994	5.81741	17.58	5.37461e-56	8.75913e-54	116.622
PRKCE	-1.00593	5.76324	-17.5782	5.48851e-56	8.88306e-54	116.602
DNA2	1.47344	5.42757	17.5759	5.64129e-56	9.0678e-54	116.574
KANK3	-1.70098	5.31908	-17.5659	6.33157e-56	1.01081e-53	116.459
NECAB1	-2.57975	4.00426	-17.5221	1.05178e-55	1.66777e-53	115.955
PSAT1	1.58568	6.61565	17.4842	1.63102e-55	2.56891e-53	115.519
MYO7A	1.40574	5.42447	17.4326	2.96194e-55	4.63405e-53	114.926
TRHDE	-3.15305	1.94739	-17.4104	3.83217e-55	5.94548e-53	114.67
MIR4653	3.21523	5.48982	17.4099	3.85083e-55	5.94548e-53	114.665
PKMYT1	2.00862	5.45355	17.392	4.73755e-55	7.26672e-53	114.459
DDX11-AS1	1.84662	3.54855	17.382	5.31927e-55	8.10601e-53	114.344
NRG3	-2.49511	1.73541	-17.3628	6.63671e-55	1.00484e-52	114.124
STARD13	-1.15781	5.66279	-17.357	7.09547e-55	1.06741e-52	114.058
CAT	-0.556106	7.44526	-17.3473	7.93765e-55	1.1865e-52	113.946
PTPN21	-1.20871	6.02177	-17.3437	8.27305e-55	1.22881e-52	113.905
HMGB3	0.929427	7.51842	17.3165	1.13333e-54	1.67277e-52	113.592
SSMEM1	-1.62878	0.582672	-17.3099	1.22189e-54	1.79221e-52	113.517
DONSON	0.77241	6.31131	17.2652	2.04665e-54	2.98327e-52	113.005
EDNRB	-1.63605	6.04041	-17.2455	2.56811e-54	3.72028e-52	112.779
FGF10-AS1	-1.70588	0.534033	-17.2414	2.69287e-54	3.87708e-52	112.732
SH2D3C	-1.03011	6.31171	-17.1959	4.54941e-54	6.51009e-52	112.211
POLE2	1.45999	5.5412	17.1676	6.30294e-54	8.96469e-52	111.887
LIMS2	-1.51152	5.72568	-17.1157	1.14448e-53	1.61799e-51	111.294
RXFP2	-2.43776	1.01205	-17.1102	1.21945e-53	1.71365e-51	111.231
TRIM58	-2.75437	2.13302	-17.1071	1.26343e-53	1.76489e-51	111.196
TFR2	2.08143	4.20753	17.0716	1.899e-53	2.63702e-51	110.791
EPN3	2.11062	5.92472	17.0656	2.03443e-53	2.80847e-51	110.722
PIMREG	2.10538	5.32336	16.9929	4.68767e-53	6.43335e-51	109.893
SPOCK2	-1.12506	6.90198	-16.9904	4.82016e-53	6.57671e-51	109.865
FXYD1	-2.44783	3.77522	-16.9498	7.68402e-53	1.04236e-50	109.401
MYCT1	-1.13758	6.02476	-16.9417	8.42482e-53	1.13629e-50	109.31
PCAT19	-1.55683	5.28289	-16.9271	9.96449e-53	1.33627e-50	109.143
BRIP1	1.89922	4.70449	16.9109	1.19873e-52	1.59839e-50	108.959
FGF10	-3.02818	2.30925	-16.8975	1.39735e-52	1.85271e-50	108.807
SYT15	-2.35735	2.25224	-16.848	2.46174e-52	3.24563e-50	108.244
CLEC14A	-0.801783	6.94295	-16.841	2.6687e-52	3.4876e-50	108.164
SPTBN1	-0.521196	7.33467	-16.8408	2.675e-52	3.4876e-50	108.162
UNC45B	-1.98855	1.7839	-16.8393	2.71886e-52	3.52521e-50	108.145
E2F3	0.68412	6.52213	16.8187	3.44191e-52	4.43818e-50	107.911
CST1	4.36545	5.44656	16.8173	3.49891e-52	4.48702e-50	107.895
PKHD1L1	-2.55414	2.29673	-16.8121	3.71047e-52	4.73246e-50	107.836
HPS5	-0.510541	6.53633	-16.8046	4.04463e-52	5.13077e-50	107.751
MCM4	0.839311	6.89589	16.8037	4.0868e-52	5.1564e-50	107.74
SEMA3G	-1.57273	5.59545	-16.7916	4.68945e-52	5.88513e-50	107.604
THSD1	-1.32228	5.38209	-16.7713	5.91211e-52	7.38008e-50	107.373
ITLN2	-4.47428	3.27735	-16.7635	6.46937e-52	8.03297e-50	107.284
ASPA	-2.41337	3.14425	-16.7504	7.50516e-52	9.23803e-50	107.136
NCKAP5	-2.92083	4.0506	-16.7503	7.5186e-52	9.23803e-50	107.135
HBA1	-3.47845	2.61712	-16.7432	8.15558e-52	9.9685e-50	107.054
CCNF	1.10435	5.95871	16.7122	1.16086e-51	1.40428e-49	106.703
CNTN6	-3.53817	3.00394	-16.6971	1.37887e-51	1.65945e-49	106.532
GPR146	-1.69301	4.25131	-16.6398	2.64953e-51	3.1563e-49	105.883
GPRIN1	1.68251	5.56921	16.6219	3.24765e-51	3.84929e-49	105.681
STXBP6	-2.65256	4.24395	-16.6182	3.38513e-51	3.99207e-49	105.639
FAM107A	-2.3145	5.47755	-16.6116	3.65044e-51	4.28343e-49	105.564
POLQ	2.3293	4.15489	16.6052	3.92875e-51	4.58706e-49	105.491
C2orf91	-2.63707	1.95799	-16.6035	4.00114e-51	4.64845e-49	105.473
KANK2	-0.576186	7.01268	-16.6015	4.09363e-51	4.73248e-49	105.451
RASIP1	-1.21307	5.95814	-16.5945	4.43603e-51	5.10318e-49	105.371
BLM	1.42285	5.14631	16.56	6.56495e-51	7.51542e-49	104.981
SLC27A6	-3.10397	1.72708	-16.5584	6.68389e-51	7.61444e-49	104.963
CELSR3	2.22685	4.74446	16.5521	7.17984e-51	8.13992e-49	104.892
OR2W3	-2.76572	1.52524	-16.5414	8.10734e-51	9.14726e-49	104.771
TFAP2A	2.64584	4.95328	16.5355	8.67456e-51	9.74041e-49	104.704
UNC5CL	1.72978	6.05957	16.5181	1.05615e-50	1.18028e-48	104.509
ASF1B	1.13842	6.56997	16.5168	1.07243e-50	1.19278e-48	104.493
ODAM	-3.63472	2.52434	-16.5054	1.22063e-50	1.35121e-48	104.365
CALCRL	-1.1215	6.48737	-16.4923	1.41638e-50	1.56054e-48	104.217
EDN3	-3.02923	1.36887	-16.4662	1.90345e-50	2.08739e-48	103.923
KNL1	1.85494	4.76122	16.4651	1.928e-50	2.10448e-48	103.911
FENDRR	-2.83399	4.20113	-16.4433	2.46756e-50	2.68096e-48	103.665
FOXF1	-1.37692	5.87489	-16.4408	2.53841e-50	2.74523e-48	103.637
SPRYD7	-0.592533	6.44287	-16.4379	2.62284e-50	2.82353e-48	103.605
FHL1	-1.50619	6.38775	-16.437	2.65224e-50	2.84213e-48	103.594
ADAMTS9-AS1	-2.4289	2.46251	-16.4328	2.78068e-50	2.96623e-48	103.547
OCIAD2	0.591006	7.50563	16.4315	2.82325e-50	2.99801e-48	103.532
SKA1	2.00231	5.23697	16.4273	2.95832e-50	3.12729e-48	103.485
E2F2	1.7191	5.0031	16.4074	3.70731e-50	3.90149e-48	103.261
ALAS2	-2.80154	2.00526	-16.3945	4.2922e-50	4.49685e-48	103.115
OVCH2	-3.17435	2.22183	-16.3909	4.47037e-50	4.6627e-48	103.075
H2BC5	0.896295	7.14215	16.3715	5.56641e-50	5.7802e-48	102.857
KAT2A	0.588442	7.13815	16.3459	7.43928e-50	7.69097e-48	102.569
SOX17	-1.64105	5.01588	-16.3346	8.45092e-50	8.69852e-48	102.442
CSRNP1	-0.686199	7.14545	-16.2766	1.62769e-49	1.66806e-47	101.791
TGM1	-1.8231	4.37461	-16.2619	1.92081e-49	1.9599e-47	101.626
VWC2	-1.43881	0.745182	-16.2167	3.20081e-49	3.2518e-47	101.119
TFAP4	0.873673	5.69826	16.1936	4.15072e-49	4.19867e-47	100.861
PTPRB	-1.29281	5.9974	-16.1931	4.17377e-49	4.20386e-47	100.855
RAMP3	-1.06099	6.82965	-16.1598	6.07331e-49	6.09096e-47	100.482
PHKA1	0.888151	6.21837	16.1355	7.98997e-49	7.97909e-47	100.21
ESCO2	1.95574	4.26338	16.1321	8.29619e-49	8.24979e-47	100.172
KDELR3	0.713002	7.26622	16.116	9.94109e-49	9.84378e-47	99.9927
RHBDL2	1.52216	5.95439	16.0657	1.75046e-48	1.71882e-46	99.4305
FANCD2	0.995016	5.60755	16.0533	2.01256e-48	1.95978e-46	99.2919
TAMALIN	-1.11582	6.12168	-16.0397	2.34461e-48	2.27369e-46	99.1402
PDLIM2	-1.12702	5.73761	-16.0386	2.37336e-48	2.2921e-46	99.1281
C1QTNF6	1.2312	6.12105	16.0146	3.10967e-48	2.99089e-46	98.8596
FEZ1	-1.35681	5.2896	-15.9878	4.19744e-48	4.02063e-46	98.5615
TUBB1	-2.17719	2.84568	-15.9843	4.36395e-48	4.16314e-46	98.5229
RGS9	-1.84455	4.06655	-15.9731	4.95298e-48	4.70593e-46	98.3971
ABCA12	3.40598	4.24805	15.9676	5.26522e-48	4.98243e-46	98.3363
CRABP2	1.55766	7.46406	15.9386	7.28311e-48	6.86426e-46	98.014
IQSEC3	-2.26963	3.3688	-15.9339	7.68105e-48	7.21036e-46	97.9611
CILP2	2.50209	5.23452	15.9228	8.69343e-48	8.12818e-46	97.8381
AURKA	1.19549	6.48662	15.9113	9.89027e-48	9.21051e-46	97.71
PMM2	0.657475	6.0107	15.8985	1.14204e-47	1.05934e-45	97.5671
NMUR1	-2.1362	3.79873	-15.8956	1.17969e-47	1.08996e-45	97.5348
CDT1	1.5355	6.11176	15.8593	1.76907e-47	1.6281e-45	97.1322
HELT	-2.5629	0.981163	-15.8559	1.83814e-47	1.68506e-45	97.0942
CASP12	-2.19836	2.7527	-15.8478	2.01345e-47	1.83859e-45	97.0037
ARHGEF26	-1.35217	6.03011	-15.8219	2.68684e-47	2.43455e-45	96.717
NDST1	-0.562295	6.98864	-15.7894	3.86568e-47	3.48101e-45	96.3556
MGC27382	-3.26248	2.41146	-15.7892	3.87141e-47	3.48101e-45	96.3541
GPD1	-2.60893	4.7867	-15.7703	4.78122e-47	4.28266e-45	96.1444
PLAC9	-1.26896	6.12147	-15.7636	5.15294e-47	4.59807e-45	96.07
CHIAP2	-4.09997	2.54509	-15.7482	6.1213e-47	5.44146e-45	95.899
LOXHD1	-1.84435	1.78209	-15.7402	6.6908e-47	5.92527e-45	95.8106
GREM1	3.06785	5.27157	15.7386	6.80883e-47	6.00713e-45	95.7932
SPC25	1.48772	5.65557	15.7318	7.34872e-47	6.45917e-45	95.7174
ZFP69B	1.20547	4.97064	15.7085	9.52683e-47	8.34238e-45	95.4595
SYN3-AS1	-2.98318	1.35562	-15.7073	9.65341e-47	8.42179e-45	95.4464
MAD2L1	1.42028	5.85766	15.69	1.17044e-46	1.01357e-44	95.255
TICRR	2.05433	4.21973	15.6682	1.49197e-46	1.28726e-44	95.0138
KIFC1	1.30555	6.41226	15.6677	1.49946e-46	1.28898e-44	95.0089
EMCN	-1.45358	5.84102	-15.6631	1.57757e-46	1.35118e-44	94.9584
SESN1	-0.795275	6.33312	-15.6575	1.67974e-46	1.43346e-44	94.8961
MGAT3	-2.15456	5.13929	-15.6538	1.74984e-46	1.48787e-44	94.8555
LY6G6E	-1.56156	0.480015	-15.6507	1.81078e-46	1.53413e-44	94.8214
ALKAL2	-2.68848	3.63045	-15.6428	1.97865e-46	1.67032e-44	94.7334
INTS8	0.525566	6.56036	15.6398	2.04442e-46	1.71965e-44	94.7009
SBSPON	-1.99617	4.61945	-15.6393	2.05627e-46	1.72345e-44	94.6951
TBC1D26-AS1	-1.66053	0.524874	-15.6037	3.05507e-46	2.55147e-44	94.3018
MIR3945HG	-2.64091	3.97137	-15.598	3.25427e-46	2.7082e-44	94.2391
GP9	-2.66585	1.704	-15.5712	4.38082e-46	3.63283e-44	93.9437
CAVIN1	-0.550027	7.63576	-15.5662	4.63211e-46	3.82769e-44	93.8883
SHCBP1	1.4272	5.66381	15.5602	4.94943e-46	4.07556e-44	93.8225
NLRC4	-1.33595	5.30447	-15.5543	5.28475e-46	4.33645e-44	93.7574
ECE2	1.36264	5.49268	15.5067	8.95554e-46	7.32295e-44	93.2334
ECT2	0.882978	6.70059	15.4456	1.76121e-45	1.43514e-43	92.5615
LRRC32	-0.832005	6.74356	-15.4417	1.83969e-45	1.4939e-43	92.5182
ADAMTS14	1.90301	4.97028	15.4215	2.29971e-45	1.86102e-43	92.2965
LGI3	-4.05081	3.65475	-15.3584	4.61633e-45	3.72289e-43	91.6043
TIMM8A	0.684741	6.05355	15.3449	5.35504e-45	4.30384e-43	91.4569
CD93	-0.744564	7.05932	-15.3339	6.05007e-45	4.84584e-43	91.3356
OR6K4P	-1.33397	0.310965	-15.3212	6.95964e-45	5.5554e-43	91.1965
RCAN1	-0.725262	6.54798	-15.3102	7.85196e-45	6.24643e-43	91.0767
GPIHBP1	-2.38795	5.1372	-15.308	8.0486e-45	6.38124e-43	91.0521
SH3GL2	-3.25291	2.4064	-15.3057	8.25667e-45	6.52416e-43	91.0268
C2CD4A	2.50975	5.42985	15.3037	8.44133e-45	6.64769e-43	91.0048
FANCF	0.508704	6.45596	15.3002	8.77273e-45	6.88557e-43	90.9665
KIF17	-1.60509	4.23672	-15.288	1.00338e-44	7.84911e-43	90.8331
CENPI	1.81444	4.90293	15.2692	1.23308e-44	9.61389e-43	90.6284
AGTPBP1	-0.600611	6.34071	-15.2575	1.40264e-44	1.08997e-42	90.5004
KIAA0408	-2.17289	1.53099	-15.2564	1.4207e-44	1.10036e-42	90.4877
DCC	-2.34083	2.42486	-15.2379	1.74028e-44	1.34345e-42	90.2861
FABP4	-2.63308	5.51663	-15.23	1.89985e-44	1.46182e-42	90.199
LYVE1	-1.72059	5.62816	-15.2263	1.97875e-44	1.51756e-42	90.1586
SYT12	3.37085	4.4859	15.2216	2.08167e-44	1.59129e-42	90.1082
QKI	-0.594664	6.6438	-15.2194	2.13298e-44	1.62522e-42	90.084
IL3RA	-0.708604	6.66395	-15.1977	2.70711e-44	2.056e-42	89.8472
ENTPD8	2.981	4.49111	15.1843	3.13695e-44	2.37478e-42	89.7009
GINS4	1.55815	4.98412	15.1548	4.33733e-44	3.27294e-42	89.379
SMAD6	-1.31954	5.49238	-15.1516	4.49224e-44	3.37897e-42	89.3442
MBNL1-AS1	-1.62528	4.19541	-15.1325	5.53971e-44	4.15355e-42	89.136
TRAPPC3L	-1.53322	1.33481	-15.1301	5.68383e-44	4.24803e-42	89.1105
SLC24A4	-1.86862	2.19683	-15.1273	5.86308e-44	4.36808e-42	89.0796
NPR1	-1.50352	5.84799	-15.1244	6.05271e-44	4.49509e-42	89.048
RAD51	1.37091	5.575	15.1109	7.01713e-44	5.19489e-42	88.9012
RAPGEF4	-1.35744	4.77512	-15.104	7.56714e-44	5.58445e-42	88.8262
LMNB1	0.734056	6.89965	15.1012	7.80651e-44	5.74304e-42	88.7953
GLIPR2	-0.798372	6.9673	-15.0772	1.01463e-43	7.44106e-42	88.5349
LHFPL6	-0.604614	7.03375	-15.046	1.42857e-43	1.04117e-41	88.1951
SPATS2	0.57239	6.44511	15.0441	1.45807e-43	1.05938e-41	88.1748
SLC35F2	0.779431	6.86891	15.0433	1.47111e-43	1.06556e-41	88.1659
CD36	-1.79467	5.68271	-15.0226	1.84399e-43	1.33153e-41	87.9415
THBD	-0.897687	6.87198	-15.0206	1.88588e-43	1.3576e-41	87.9192
HS6ST2	2.08063	6.25429	15.0176	1.94817e-43	1.39816e-41	87.8869
ERO1A	0.560533	7.33245	15.0058	2.21694e-43	1.58137e-41	87.7586
AGER	-1.70685	6.99242	-14.9964	2.45496e-43	1.74057e-41	87.6573
FIGNL1	0.845918	6.10971	14.9935	2.53514e-43	1.79201e-41	87.6254
RCCD1	0.764257	5.93134	14.9909	2.60878e-43	1.83852e-41	87.5969
CYP27B1	1.4369	5.46825	14.9693	3.3001e-43	2.31877e-41	87.3635
KL	-2.1331	4.37186	-14.939	4.59146e-43	3.21649e-41	87.0355
LBX2	1.58771	4.31414	14.9331	4.8973e-43	3.42053e-41	86.9714
PEAK1	-0.931158	5.78948	-14.9216	5.55243e-43	3.8666e-41	86.8467
GIMAP6	-0.903122	6.57095	-14.9105	6.26869e-43	4.35248e-41	86.7262
SLC19A3	-2.37152	4.35815	-14.9099	6.30745e-43	4.36647e-41	86.7201
TNS1	-0.729251	7.14187	-14.9078	6.45746e-43	4.45716e-41	86.6967
TIE1	-0.9474	6.29597	-14.8973	7.2326e-43	4.97756e-41	86.5841
TIMELESS	0.710584	6.6627	14.8903	7.81238e-43	5.36085e-41	86.5076
EPM2A	-0.902015	4.85026	-14.8723	9.49569e-43	6.49693e-41	86.3138
RPP40	0.893206	6.02357	14.8696	9.77766e-43	6.67041e-41	86.2847
DDX12P	1.72493	4.81433	14.8591	1.09612e-42	7.45614e-41	86.1712
KIF23	1.45972	5.71144	14.8546	1.15187e-42	7.81276e-41	86.122
MMP13	3.55577	5.09074	14.829	1.52148e-42	1.02604e-40	85.8456
EPHA10	2.53395	4.84238	14.818	1.71411e-42	1.15263e-40	85.7272
GCNT3	2.64377	5.59318	14.8008	2.0667e-42	1.38575e-40	85.5414
ACKR4	-2.18834	4.05118	-14.7997	2.09184e-42	1.39861e-40	85.5294
PDK1	1.01459	5.6898	14.7861	2.42443e-42	1.6118e-40	85.3829
RPL13AP17	-3.80885	3.15274	-14.7826	2.51741e-42	1.66889e-40	85.3455
SLC25A10	1.01698	6.49018	14.7305	4.42794e-42	2.91896e-40	84.7847
PPP1R15A	-0.501811	7.41569	-14.7199	4.96852e-42	3.26614e-40	84.6703
SLC44A3-AS1	1.06561	5.38895	14.7151	5.23046e-42	3.42872e-40	84.6192
ARC	-2.58271	3.67665	-14.7136	5.3208e-42	3.47823e-40	84.6022
CENPK	1.44247	5.25248	14.7131	5.34497e-42	3.48432e-40	84.5977
CDO1	-2.02185	4.68693	-14.7076	5.67369e-42	3.68837e-40	84.5385
PPP1R14BP3	0.638361	7.37689	14.7061	5.77068e-42	3.74106e-40	84.5216
SIRPD	-1.88628	1.82596	-14.6869	7.1002e-42	4.59029e-40	84.3157
CLSPN	1.82628	4.94936	14.6683	8.68325e-42	5.59831e-40	84.1159
KISS1R	3.32943	3.62143	14.6669	8.81525e-42	5.66784e-40	84.1009
MRPL20-DT	1.18022	5.39091	14.6625	9.23995e-42	5.92467e-40	84.0541
TFAP2A-AS1	2.33103	3.54086	14.6543	1.01008e-41	6.44147e-40	83.9657
FCN3	-1.9007	6.00447	-14.646	1.10504e-41	7.02792e-40	83.8765
CENPE	1.72372	4.95538	14.643	1.14108e-41	7.23176e-40	83.8446
VPS9D1-AS1	1.77265	5.57856	14.6428	1.14325e-41	7.23176e-40	83.8427
SNX22	-1.23667	5.16266	-14.6296	1.31941e-41	8.32361e-40	83.7004
CA4	-3.40814	4.09345	-14.5794	2.26725e-41	1.42267e-39	83.1628
CAVIN2	-1.17041	6.91589	-14.5698	2.51405e-41	1.57333e-39	83.0602
EFCC1	-1.61252	5.36449	-14.5678	2.56838e-41	1.60305e-39	83.0389
SYN2	-2.40393	2.26853	-14.5601	2.79197e-41	1.73798e-39	82.956
XYLB	1.085	5.06966	14.5578	2.86018e-41	1.77574e-39	82.9321
PLEKHA8	0.768111	5.721	14.5288	3.91185e-41	2.42225e-39	82.6211
GPR89A	0.776826	4.89869	14.5074	4.92329e-41	3.04052e-39	82.3928
GIMAP1	-1.21464	5.55629	-14.5021	5.21242e-41	3.21063e-39	82.3361
PPM1F	-0.618589	6.20115	-14.4993	5.36982e-41	3.29893e-39	82.3066
FOLR3	-3.21956	2.9349	-14.4914	5.85037e-41	3.58477e-39	82.2214
XDH	2.2905	5.4125	14.4856	6.22145e-41	3.80222e-39	82.1604
BDNF	-2.59988	3.04911	-14.4817	6.48718e-41	3.95432e-39	82.1189
PLAC9P1	-2.2747	1.36244	-14.477	6.82599e-41	4.15006e-39	82.0683
ARHGAP31	-1.03704	6.33079	-14.4729	7.13719e-41	4.32805e-39	82.024
CLEC3B	-1.52756	6.53711	-14.4597	8.22129e-41	4.95982e-39	81.8836
OIP5	1.43103	5.44284	14.4532	8.81747e-41	5.30585e-39	81.8141
ANGPTL1	-1.98245	4.52482	-14.4465	9.47623e-41	5.68768e-39	81.7426
HBEGF	-0.95134	6.74902	-14.4364	1.05543e-40	6.31856e-39	81.6356
DPEP2	-1.43095	5.4545	-14.4176	1.29182e-40	7.71408e-39	81.4349
PPP1R14D	2.95478	5.74887	14.4104	1.39478e-40	8.3078e-39	81.3587
THBS2	0.976339	7.17864	14.4083	1.42724e-40	8.47958e-39	81.3359
MTMR10	-0.629013	6.08173	-14.4073	1.4434e-40	8.55398e-39	81.3247
COX7A1	-0.837393	6.46117	-14.3934	1.67502e-40	9.90161e-39	81.1769
P2RY6	1.62333	5.9374	14.3929	1.68381e-40	9.92857e-39	81.1717
LMCD1	-0.822141	6.23427	-14.3714	2.1194e-40	1.24657e-38	80.9433
FAM189A1	-2.40351	2.65209	-14.3682	2.19403e-40	1.28724e-38	80.9089
RNF182	-2.35562	3.28499	-14.3652	2.26391e-40	1.32492e-38	80.8778
KCNAB1	-1.36191	4.21309	-14.3475	2.73792e-40	1.59438e-38	80.689
GALNT7	0.639429	6.90106	14.3472	2.74495e-40	1.59452e-38	80.6865
GPX3	-0.62325	7.6643	-14.3341	3.15976e-40	1.83095e-38	80.5468
PRSS35	-2.24904	3.30925	-14.3314	3.25203e-40	1.87977e-38	80.5182
SULT1C4	-1.74999	4.63156	-14.331	3.26699e-40	1.88378e-38	80.5136
CFP	-1.59459	4.75166	-14.319	3.71321e-40	2.1306e-38	80.3865
DAO	-1.26794	0.744753	-14.3152	3.86927e-40	2.21473e-38	80.3456
VSIR	-0.618473	6.9238	-14.3125	3.98219e-40	2.27382e-38	80.3171
SECISBP2L	-0.591409	6.83501	-14.2985	4.62078e-40	2.63205e-38	80.1694
ANKRD1	-2.9913	4.60415	-14.2883	5.15342e-40	2.92834e-38	80.0611
PARPBP	1.35898	5.13382	14.2778	5.7683e-40	3.26982e-38	79.9492
PKNOX2	-2.00185	4.24471	-14.2726	6.09766e-40	3.44819e-38	79.894
TMEM204	-0.67827	6.82209	-14.2629	6.75793e-40	3.81238e-38	79.7919
PAX6	-1.24661	2.5574	-14.259	7.04935e-40	3.96725e-38	79.75
SYNPO2L	-1.96175	2.07112	-14.2509	7.68763e-40	4.31611e-38	79.664
SEMA5A	-1.58804	5.53749	-14.2324	9.35665e-40	5.24062e-38	79.4689
UPK3B	-2.70389	5.2945	-14.2262	9.99632e-40	5.58556e-38	79.4032
PALMD	-1.31381	5.42453	-14.2176	1.09578e-39	6.10824e-38	79.3121
TK1	0.839382	7.26492	14.2104	1.18377e-39	6.58312e-38	79.2354
MMP12	2.36945	6.2637	14.2097	1.19223e-39	6.6145e-38	79.2283
DNAJC22	2.28689	4.97983	14.1985	1.34273e-39	7.43187e-38	79.1103
AOC3	-0.984272	6.90736	-14.1702	1.81495e-39	1.00219e-37	78.8111
CMTM2	-1.69809	3.81271	-14.1554	2.12466e-39	1.17046e-37	78.6547
CDK1	1.04907	6.55531	14.1536	2.166e-39	1.19044e-37	78.6355
IGSF10	-2.47998	4.07916	-14.1477	2.30647e-39	1.26468e-37	78.5731
JCAD	-0.921083	6.43784	-14.1443	2.39043e-39	1.30766e-37	78.5377
H2BC20P	1.15158	5.78561	14.1415	2.46251e-39	1.34396e-37	78.5082
SIRPB1	-2.04995	4.69424	-14.1391	2.52768e-39	1.37632e-37	78.4822
ERVFRD-1	-2.15027	2.11165	-14.1374	2.57279e-39	1.39765e-37	78.4647
KRT79	-2.44473	1.79417	-14.1309	2.75744e-39	1.49449e-37	78.3958
MSI2	0.65066	6.23885	14.1179	3.16605e-39	1.70806e-37	78.2587
SLC14A1	-2.25713	3.4829	-14.1102	3.43315e-39	1.84792e-37	78.1783
SLIT2	-1.33765	5.85709	-14.108	3.51504e-39	1.88766e-37	78.1548
MIR22HG	-0.649923	6.68596	-14.0974	3.93471e-39	2.10821e-37	78.0429
FAT3	-2.26817	1.98801	-14.0803	4.71881e-39	2.51684e-37	77.8625
PTPRD-AS1	-2.03787	2.55656	-14.0747	5.00746e-39	2.66474e-37	77.8035
SUV39H2	0.713033	6.01906	14.0714	5.18575e-39	2.74887e-37	77.7688
RNVU1-32	2.60379	4.88247	14.0568	6.04885e-39	3.19717e-37	77.616
ESAM	-0.713376	7.1075	-14.0514	6.41035e-39	3.38063e-37	77.5583
TRIP13	1.3682	6.22332	14.0509	6.44397e-39	3.39074e-37	77.5531
CLIC5	-1.98445	5.87611	-14.0451	6.85178e-39	3.59726e-37	77.4922
TMEM79	0.705002	6.15618	14.0336	7.73271e-39	4.0507e-37	77.3721
ADCY4	-1.13258	5.17842	-14.0249	8.48435e-39	4.43454e-37	77.28
ADGRE3	-2.32262	3.54755	-14.0242	8.5447e-39	4.45616e-37	77.273
HTR3A	3.34545	4.30817	14.0219	8.75576e-39	4.5561e-37	77.2488
SRL	-1.69974	2.67384	-13.9993	1.11168e-38	5.75916e-37	77.0118
ZFPM2-AS1	3.35946	4.39452	13.9979	1.12822e-38	5.83195e-37	76.9971
FHL5	-1.93008	4.96544	-13.9916	1.20635e-38	6.2221e-37	76.9306
CYP3A7	-1.88186	2.59558	-13.9905	1.22014e-38	6.27945e-37	76.9194
FERMT2	-0.617968	6.5916	-13.9866	1.27141e-38	6.52896e-37	76.8785
FLI1	-0.920308	6.03058	-13.9804	1.35798e-38	6.94313e-37	76.8131
TCEAL2	-2.77303	3.77492	-13.9741	1.45166e-38	7.40597e-37	76.7469
AFAP1L1	-0.883013	6.04052	-13.9674	1.55848e-38	7.9337e-37	76.6764
HNF4G	2.43206	4.92804	13.9332	2.23479e-38	1.1352e-36	76.3186
RADIL	-2.10461	3.88741	-13.9319	2.26568e-38	1.1484e-36	76.305
ANGPTL5	-2.07781	1.92271	-13.9304	2.3016e-38	1.1641e-36	76.2893
TBX3	-1.25521	5.62503	-13.9217	2.52307e-38	1.27336e-36	76.1982
CTSLP8	-2.35825	1.03781	-13.9214	2.53273e-38	1.2755e-36	76.1944
ANO2	-1.81645	2.6456	-13.9124	2.78408e-38	1.39908e-36	76.1004
ANO7	1.37759	4.27287	13.911	2.82614e-38	1.41718e-36	76.0855
CORO2B	-1.69371	4.69941	-13.9106	2.83708e-38	1.41963e-36	76.0817
NCAPG2	0.860365	6.22884	13.8898	3.53201e-38	1.7636e-36	75.8642
SYNC	-1.44721	4.64322	-13.8799	3.91942e-38	1.95289e-36	75.7609
NIM1K	-2.08805	3.73844	-13.8648	4.59419e-38	2.28425e-36	75.6032
BPHL	0.671507	6.1594	13.8493	5.41072e-38	2.68454e-36	75.4408
RASGRP4	-1.47757	4.73085	-13.8185	7.47656e-38	3.68613e-36	75.1198
UQCC2	0.591324	6.77496	13.8136	7.87174e-38	3.87283e-36	75.0687
HEMGN	-1.56152	1.00391	-13.8122	7.99076e-38	3.92316e-36	75.0538
SYNM	-1.11394	5.50223	-13.8092	8.2485e-38	4.04125e-36	75.0223
CBLC	1.38706	6.68814	13.8009	8.99792e-38	4.39923e-36	74.936
F11	-3.39427	2.91083	-13.7976	9.31757e-38	4.54605e-36	74.9013
RNU5E-8P	-2.65742	0.696083	-13.7949	9.57901e-38	4.66391e-36	74.8739
ECEL1P2	-3.22268	3.72998	-13.7942	9.65627e-38	4.69179e-36	74.8659
HYLS1	0.769337	5.78917	13.7932	9.75416e-38	4.72956e-36	74.8559
ZYG11A	3.09618	3.62735	13.7839	1.07559e-37	5.20455e-36	74.7588
BCL6B	-0.874557	6.11405	-13.7757	1.17173e-37	5.65805e-36	74.6739
RBMS2	-0.511856	6.81311	-13.7687	1.26117e-37	6.065e-36	74.6008
GDF10	-2.53357	4.72706	-13.725	1.99335e-37	9.54692e-36	74.1465
WFS1	-0.60376	7.08432	-13.7234	2.02871e-37	9.6965e-36	74.129
ACP6	0.801541	5.80951	13.7054	2.44716e-37	1.16728e-35	73.9429
C1orf220	1.79314	3.27325	13.6998	2.5965e-37	1.236e-35	73.8841
TMEM100	-2.31982	5.46394	-13.6973	2.66367e-37	1.26441e-35	73.8587
DOCK4	-0.878604	6.01086	-13.6972	2.66696e-37	1.26441e-35	73.8575
B3GNTL1	0.843361	5.3339	13.6959	2.7027e-37	1.27877e-35	73.8443
APOA1	-2.35845	2.74136	-13.6826	3.10662e-37	1.46692e-35	73.706
CA9	3.09221	5.31733	13.6528	4.24215e-37	1.99887e-35	73.3968
ABCG2	-1.39521	5.0318	-13.6526	4.25019e-37	1.99887e-35	73.395
ADH1A	-2.11624	1.54768	-13.6407	4.81301e-37	2.25903e-35	73.2715
TYMSOS	1.78574	4.39823	13.6384	4.93209e-37	2.31031e-35	73.2473
ADRA1D	-2.0914	2.74141	-13.6304	5.35834e-37	2.50497e-35	73.165
LDLR	-0.674723	7.04028	-13.6077	6.79024e-37	3.16806e-35	72.9299
ITGA11	1.70109	5.73013	13.6031	7.12631e-37	3.31826e-35	72.882
ADGRE1	-2.17344	4.23336	-13.6008	7.30189e-37	3.39328e-35	72.8578
ART4	-2.25919	3.26713	-13.5981	7.50271e-37	3.47971e-35	72.8309
GBAP1	1.15766	4.84912	13.5849	8.61463e-37	3.98754e-35	72.6938
CGNL1	-1.07993	6.33096	-13.5788	9.17638e-37	4.23087e-35	72.6311
ZNF423	-1.5195	4.05609	-13.5739	9.65367e-37	4.4422e-35	72.5807
FGF2	-1.72038	4.43462	-13.5566	1.15594e-36	5.29836e-35	72.4019
P4HA3	1.50444	5.2838	13.549	1.25189e-36	5.72697e-35	72.3228
GFOD1	-1.29061	4.88491	-13.531	1.50903e-36	6.88986e-35	72.1374
ABCC13	-1.82947	1.19804	-13.5245	1.61495e-36	7.35917e-35	72.0701
ELF3-AS1	1.08036	5.73904	13.5237	1.6283e-36	7.39694e-35	72.0619
MGAT3-AS1	-2.85765	1.94593	-13.5169	1.74695e-36	7.91458e-35	71.9921
PUS7	0.587244	6.45069	13.5087	1.90282e-36	8.60413e-35	71.9073
ZC3HAV1L	0.912655	5.98082	13.5058	1.96179e-36	8.8537e-35	71.877
NTRK3	-1.72913	1.88354	-13.4973	2.14122e-36	9.64492e-35	71.7901
ADAMTSL3	-1.88628	4.50239	-13.4854	2.42426e-36	1.0899e-34	71.6669
MED28P8	-1.76247	0.57534	-13.4703	2.83401e-36	1.27168e-34	71.5119
PDCD2L	0.670467	6.50992	13.4646	3.00686e-36	1.34666e-34	71.4532
PITX1	3.06462	5.13232	13.4606	3.1342e-36	1.40102e-34	71.412
HSF2BP	1.63505	3.96995	13.4556	3.30035e-36	1.47249e-34	71.3608
SPDL1	0.729621	5.88375	13.455	3.32066e-36	1.47873e-34	71.3547
TSPAN18	-1.07835	6.01133	-13.4507	3.47224e-36	1.5433e-34	71.3104
SPRED3	1.81863	4.06494	13.4489	3.53786e-36	1.5695e-34	71.2918
FGR	-0.914276	6.57973	-13.4479	3.5738e-36	1.58245e-34	71.2818
NXF3	-2.56587	2.9503	-13.4455	3.66461e-36	1.61961e-34	71.2569
ARSH	2.53943	2.58621	13.4449	3.68946e-36	1.62752e-34	71.2502
LASTR	3.10223	3.45241	13.4377	3.97364e-36	1.74959e-34	71.1765
MCM2	0.758101	6.79433	13.4319	4.21978e-36	1.85449e-34	71.1169
WDR12	0.54072	6.13756	13.4272	4.43194e-36	1.94409e-34	71.0682
TOM1L2	-0.60156	6.63309	-13.416	4.97305e-36	2.17738e-34	70.9539
IL1RL2	1.63202	4.98295	13.4154	5.00728e-36	2.18828e-34	70.9471
FXYD6	-1.00734	6.12336	-13.4087	5.36343e-36	2.33957e-34	70.8789
MFNG	-0.708407	6.5573	-13.4079	5.40747e-36	2.35441e-34	70.8708
H2AC13	2.72659	4.35738	13.4053	5.55772e-36	2.41535e-34	70.8436
CXCL13	2.087	6.59199	13.4033	5.67416e-36	2.46139e-34	70.823
TMEM88	-1.19887	5.8352	-13.3966	6.07966e-36	2.62758e-34	70.7545
CFL2	-0.702328	6.33698	-13.3792	7.27693e-36	3.13925e-34	70.5761
ASAH2B	0.802867	5.04631	13.3686	8.11835e-36	3.49581e-34	70.4675
NHSL1	-0.999118	6.00794	-13.3667	8.27716e-36	3.55766e-34	70.4483
CBX7	-0.871845	6.22391	-13.3639	8.52328e-36	3.65675e-34	70.4192
ADCYAP1R1	-1.84399	2.39762	-13.3507	9.76626e-36	4.18238e-34	70.2841
SNHG4	1.43527	5.0203	13.3364	1.132e-35	4.82138e-34	70.1376
MDK	0.650331	7.80492	13.3332	1.17039e-35	4.97584e-34	70.1045
AVPR2	-1.98025	3.51064	-13.3299	1.21022e-35	5.12661e-34	70.0713
LATS2	-0.5334	6.53143	-13.3284	1.22942e-35	5.19855e-34	70.0557
SLC2A5	1.89047	4.87963	13.3117	1.46027e-35	6.1636e-34	69.885
CAV2	-0.930193	6.93435	-13.3094	1.49536e-35	6.30036e-34	69.8614
INSL3	1.79483	3.88222	13.3044	1.57487e-35	6.61164e-34	69.81
ARHGAP11A	1.11971	5.75249	13.2887	1.85011e-35	7.75327e-34	69.6502
TBC1D26	-1.11413	0.501402	-13.2879	1.86542e-35	7.8035e-34	69.642
KCNIP1	-1.79475	2.51915	-13.2828	1.96794e-35	8.21305e-34	69.5889
SAMD10	0.840484	6.37281	13.2791	2.04255e-35	8.49904e-34	69.552
CASKIN2	-0.654895	6.66234	-13.2766	2.09585e-35	8.70538e-34	69.5264
DCST1	1.83353	3.30228	13.2603	2.47904e-35	1.02788e-33	69.3598
TMCO2	-1.73226	1.02709	-13.2492	2.7794e-35	1.15039e-33	69.2463
TWNK	0.654047	6.28372	13.2474	2.83135e-35	1.16983e-33	69.2279
DUS4L	0.674773	5.63164	13.2381	3.11586e-35	1.28286e-33	69.1329
MRM1	0.634739	6.39145	13.2359	3.18647e-35	1.30735e-33	69.1107
FOXD2-AS1	1.03749	5.4773	13.2165	3.88851e-35	1.58705e-33	68.9131
IHH	-3.05301	3.18058	-13.2163	3.89528e-35	1.58705e-33	68.9114
RXRG	-2.77812	3.44985	-13.2074	4.27054e-35	1.73693e-33	68.8201
CARD14	2.05432	4.46607	13.2059	4.33714e-35	1.76097e-33	68.8048
ZNF138	0.613152	6.19128	13.2026	4.48576e-35	1.81816e-33	68.7714
PELATON	-1.19747	6.2713	-13.2023	4.4974e-35	1.81974e-33	68.7688
CCNE2	1.26766	5.00564	13.1933	4.93561e-35	1.99361e-33	68.6765
BMPER	-2.47098	3.5844	-13.1807	5.61646e-35	2.26473e-33	68.5483
INMT	-1.53435	6.46113	-13.1786	5.73871e-35	2.31005e-33	68.5269
SEPTIN4	-1.00984	5.26332	-13.1662	6.51474e-35	2.61347e-33	68.4011
MME	-1.98788	5.1879	-13.1489	7.77375e-35	3.11321e-33	68.2258
FOXD3-AS1	3.45026	3.3955	13.1476	7.87923e-35	3.15008e-33	68.2124
PARS2	0.571761	6.07487	13.1455	8.05512e-35	3.21493e-33	68.1905
ANOS1	-1.35903	6.26654	-13.1402	8.49932e-35	3.38645e-33	68.1373
CCIN	-1.81003	2.45901	-13.138	8.69883e-35	3.46007e-33	68.1142
ITPRIP	-0.712194	6.4831	-13.1368	8.80307e-35	3.49561e-33	68.1024
CXCR2	-1.9844	4.16228	-13.1149	1.10077e-34	4.35629e-33	67.8807
BMX	-1.93626	3.77327	-13.1076	1.18678e-34	4.68877e-33	67.806
CCDC150	1.71438	3.16703	13.093	1.378e-34	5.4351e-33	67.6578
ACADL	-2.78041	4.2175	-13.0905	1.41322e-34	5.56468e-33	67.6328
SBF2-AS1	0.855532	5.29221	13.0892	1.43234e-34	5.63053e-33	67.6194
FOXP3	1.29378	5.56638	13.0808	1.55967e-34	6.1208e-33	67.5349
SYNPO	-0.656503	6.98951	-13.0771	1.61967e-34	6.34564e-33	67.4975
OR5E1P	-1.73517	0.726834	-13.0733	1.68456e-34	6.58887e-33	67.4585
KLF9	-0.591437	6.95302	-13.0719	1.70926e-34	6.67436e-33	67.4441
SEMA6D	-1.8526	4.33835	-13.0642	1.84755e-34	7.20239e-33	67.3669
CNRIP1	-0.890731	5.81095	-13.0618	1.89496e-34	7.37494e-33	67.3418
CD52	-0.659845	7.51436	-13.0595	1.93883e-34	7.5332e-33	67.319
FMO2	-1.46458	6.32312	-13.0556	2.01775e-34	7.82689e-33	67.2795
FRMD4A	-0.923856	5.1623	-13.0535	2.06227e-34	7.98635e-33	67.2578
WDR62	1.49	4.96029	13.0457	2.23199e-34	8.62938e-33	67.1793
MYO7B	-2.06026	3.0878	-13.0453	2.24033e-34	8.64739e-33	67.1756
MTBP	1.18348	4.6057	13.0442	2.26764e-34	8.72607e-33	67.1636
IL17D	-1.38128	4.08364	-13.0441	2.26815e-34	8.72607e-33	67.1634
DGCR5	2.39491	4.31613	13.0198	2.9072e-34	1.11663e-32	66.9171
PRKCH	-0.522197	6.38883	-13.0142	3.07842e-34	1.18046e-32	66.8604
GAS6	-0.651409	7.14454	-13.0016	3.4977e-34	1.3347e-32	66.7337
CTIF	-0.601746	6.27729	-12.9974	3.64965e-34	1.39042e-32	66.6915
GUCY1A2	-1.59998	4.64386	-12.9939	3.78168e-34	1.43839e-32	66.6562
MSRB3	-0.944188	6.29409	-12.9896	3.95385e-34	1.49901e-32	66.6121
KPNA2	0.553719	7.37382	12.9839	4.18603e-34	1.58018e-32	66.5555
RNF144B	-0.754287	6.66577	-12.9839	4.18814e-34	1.58018e-32	66.555
BCL2L15	2.01775	5.49372	12.9735	4.65421e-34	1.75321e-32	66.4503
C20orf194	-0.690195	6.06203	-12.9557	5.57598e-34	2.09371e-32	66.271
KLF13	-0.526871	6.94559	-12.9535	5.70488e-34	2.13869e-32	66.2484
LAMP3	-0.956037	7.23779	-12.9345	6.91799e-34	2.58934e-32	66.0571
MS4A7	-0.917073	6.69968	-12.9323	7.07628e-34	2.64437e-32	66.0346
FAM86JP	0.965633	5.31016	12.914	8.51558e-34	3.17717e-32	65.851
PTCRA	-2.10358	3.85073	-12.9124	8.6535e-34	3.2235e-32	65.835
DUXA	-1.29789	0.442689	-12.9072	9.12137e-34	3.3924e-32	65.7828
ATAD5	1.07902	5.10217	12.9002	9.79514e-34	3.63722e-32	65.7121
LIPN	-2.33517	2.23543	-12.8996	9.85223e-34	3.65264e-32	65.7063
ALG1L2	1.56424	4.00672	12.8982	9.99473e-34	3.69963e-32	65.6921
SPN	-1.2009	6.08275	-12.8971	1.01024e-33	3.73359e-32	65.6815
F11-AS1	-2.47548	1.94935	-12.8868	1.12143e-33	4.13151e-32	65.5779
BCHE	-2.0097	4.55973	-12.8791	1.21337e-33	4.46322e-32	65.4997
SLC2A1-AS1	1.70003	3.22692	12.8644	1.4081e-33	5.17142e-32	65.3521
COX4I2	-1.01572	6.47656	-12.8609	1.45876e-33	5.34908e-32	65.317
AFF3	-2.31299	4.0509	-12.8566	1.52322e-33	5.56887e-32	65.2741
CLDN5	-1.14892	6.55894	-12.8566	1.52344e-33	5.56887e-32	65.274
DPYSL2	-0.540805	7.30124	-12.8553	1.54324e-33	5.62371e-32	65.2612
CAB39L	-0.784935	5.97989	-12.8439	1.73198e-33	6.30171e-32	65.1467
DEFA3	-2.36975	1.08321	-12.8384	1.83086e-33	6.65117e-32	65.0916
PDE8B	-1.1614	4.85144	-12.8319	1.95546e-33	7.09285e-32	65.0263
ADAMTS1	-0.973883	6.46843	-12.8278	2.03666e-33	7.37598e-32	64.986
MCEMP1	-2.1296	5.86612	-12.8226	2.14736e-33	7.75296e-32	64.9335
PCDH9	-2.17379	2.52048	-12.8222	2.15674e-33	7.77486e-32	64.9291
JDP2	-0.609784	6.48379	-12.8149	2.32122e-33	8.35497e-32	64.8562
NUP155	0.555799	6.53499	12.8135	2.35404e-33	8.45571e-32	64.8423
COL1A1	0.605026	7.98787	12.8134	2.35642e-33	8.45571e-32	64.8413
PC	0.794153	6.51062	12.791	2.95356e-33	1.05662e-31	64.6173
LGALSL	-0.832109	6.47566	-12.7649	3.84496e-33	1.37133e-31	64.3556
HCN3	1.09051	5.36685	12.7396	4.95737e-33	1.76272e-31	64.1036
TINCR	-2.40647	3.95287	-12.7359	5.14729e-33	1.82748e-31	64.0663
PGM5-AS1	-2.5477	2.09568	-12.7303	5.44354e-33	1.92974e-31	64.0108
HSPB2	-1.44385	4.33625	-12.7255	5.71128e-33	2.0216e-31	63.9632
MED4-AS1	-2.00136	3.38082	-12.7209	5.98199e-33	2.11424e-31	63.9172
PTH1R	-1.50783	4.82549	-12.7037	7.11316e-33	2.51025e-31	63.7455
EP300-AS1	-1.29612	5.20713	-12.7035	7.12476e-33	2.51057e-31	63.7438
PIP5K1B	-1.64376	5.36593	-12.6945	7.80174e-33	2.745e-31	63.6538
CCN4	1.31876	5.83998	12.692	8.00359e-33	2.8076e-31	63.6285
NTNG1	-2.6013	2.74504	-12.687	8.40846e-33	2.94522e-31	63.5795
CPED1	-1.40813	5.32753	-12.683	8.75954e-33	3.06362e-31	63.539
CCBE1	-2.17865	4.54436	-12.6784	9.17284e-33	3.2034e-31	63.4932
PCMTD1P3	2.95033	3.20653	12.6763	9.36428e-33	3.26539e-31	63.4727
RAD51AP1	1.06793	6.00017	12.6668	1.03019e-32	3.58172e-31	63.3781
HSPB3	-2.42882	2.96547	-12.6605	1.09771e-32	3.80518e-31	63.3151
PRAM1	-1.3872	5.36041	-12.6537	1.17464e-32	4.06586e-31	63.248
SRPX	-1.03425	6.20823	-12.6496	1.22472e-32	4.23295e-31	63.2066
IGFL2	2.72247	3.87413	12.6478	1.24633e-32	4.30129e-31	63.1892
TBX2-AS1	-1.55389	4.7939	-12.6368	1.39118e-32	4.79416e-31	63.0802
MAPK4	-2.96933	3.02692	-12.6297	1.49418e-32	5.12651e-31	63.0093
C1QTNF2	-1.51163	4.40568	-12.6162	1.70969e-32	5.85737e-31	62.8757
EML1	-1.162	5.39314	-12.6024	1.96367e-32	6.70792e-31	62.7383
TACC3	0.701304	6.62828	12.6021	1.96933e-32	6.71747e-31	62.7355
DIXDC1	-0.743741	5.77871	-12.5976	2.06054e-32	7.0184e-31	62.6906
TBX2	-0.917803	6.29773	-12.5791	2.47821e-32	8.41658e-31	62.5075
WNT7A	-3.13267	3.34926	-12.5738	2.61334e-32	8.8627e-31	62.4549
VIPR1	-1.65415	5.6303	-12.5602	2.99373e-32	1.01381e-30	62.3201
ZNF239	0.967277	5.78383	12.5534	3.20326e-32	1.0832e-30	62.253
STYK1	1.46663	5.67849	12.5497	3.32291e-32	1.12204e-30	62.2166
MIR559	2.50107	5.24435	12.5422	3.58185e-32	1.20774e-30	62.1422
BMP8A	1.67596	4.42096	12.5416	3.60556e-32	1.21399e-30	62.1357
MYADM	-0.519917	7.52369	-12.5371	3.76875e-32	1.26712e-30	62.0918
LRRTM4	-1.79849	1.36666	-12.5355	3.83162e-32	1.28641e-30	62.0754
TPBG	0.799792	6.47048	12.5222	4.37487e-32	1.46671e-30	61.9439
CABP5	-0.761759	0.203139	-12.5213	4.41463e-32	1.47793e-30	61.9349
FEN1	0.55228	6.97322	12.5199	4.47324e-32	1.49541e-30	61.9218
ZNF22-AS1	-0.915721	4.8368	-12.517	4.60374e-32	1.53685e-30	61.8933
ITM2A	-0.803086	6.79244	-12.5115	4.86709e-32	1.62034e-30	61.8382
ACE	-0.849559	6.40272	-12.5115	4.86765e-32	1.62034e-30	61.838
TPRG1	-1.40978	4.17799	-12.5066	5.10978e-32	1.69853e-30	61.7899
IKBKE	0.567471	6.47449	12.5008	5.41095e-32	1.7961e-30	61.7331
GNPNAT1	0.541954	6.83958	12.4888	6.09998e-32	2.02196e-30	61.6142
DBNDD1	0.903714	6.5048	12.48	6.65598e-32	2.20314e-30	61.5277
CHEK2	0.737654	6.09672	12.4771	6.85412e-32	2.26553e-30	61.4987
CDH13	-1.36653	4.98557	-12.47	7.35463e-32	2.42755e-30	61.4288
ADRB1	-2.40953	4.75187	-12.4687	7.44908e-32	2.45527e-30	61.4161
TRHDE-AS1	-1.86627	1.13331	-12.4682	7.48434e-32	2.46343e-30	61.4114
LTBP4	-0.794671	6.97489	-12.465	7.7283e-32	2.54016e-30	61.3796
MINAR1	1.45558	3.3201	12.4554	8.49728e-32	2.78901e-30	61.2855
ARHGEF16	0.775832	6.5819	12.4531	8.69378e-32	2.84952e-30	61.2629
FANCG	0.568208	6.40816	12.4528	8.72201e-32	2.85478e-30	61.2597
ST6GALNAC5	-1.51731	5.43672	-12.446	9.33783e-32	3.05209e-30	61.192
NRN1	-1.13408	5.96041	-12.4341	1.04997e-31	3.42709e-30	61.0757
SELENOI	0.518231	6.60525	12.4224	1.17923e-31	3.833e-30	60.9606
GMNN	0.567795	6.65416	12.4092	1.3445e-31	4.35811e-30	60.8305
KRT80	1.02015	6.80747	12.4056	1.39298e-31	4.50902e-30	60.7954
HPCA	1.69865	3.19282	12.3998	1.47643e-31	4.77256e-30	60.7377
PDE2A	-1.21961	4.89773	-12.3979	1.50454e-31	4.85675e-30	60.719
OR7E36P	-2.26752	1.45006	-12.3962	1.5298e-31	4.9315e-30	60.7025
FBLN5	-0.803695	6.80154	-12.3704	1.9747e-31	6.33957e-30	60.4494
PGR	-1.72295	2.99139	-12.3508	2.39724e-31	7.67508e-30	60.2571
GPC2	1.98512	3.77272	12.3412	2.63496e-31	8.4247e-30	60.1634
PTGES	0.943321	6.97831	12.32	3.25113e-31	1.03806e-29	59.955
PDZD2	-1.59954	5.3397	-12.3182	3.30951e-31	1.05527e-29	59.9374
WWC2-AS2	-1.41789	3.28403	-12.2996	3.97599e-31	1.26263e-29	59.7554
CYBRD1	-0.624661	7.32327	-12.2792	4.86076e-31	1.54152e-29	59.5562
C1QTNF7	-2.15664	4.25931	-12.2783	4.90392e-31	1.55311e-29	59.5475
DKK2	-1.59493	4.88992	-12.2757	5.03121e-31	1.59127e-29	59.5221
ADGRL2	-0.899934	6.40739	-12.2682	5.41865e-31	1.71151e-29	59.4485
RAB40A	-1.47984	3.69822	-12.2571	6.04053e-31	1.90026e-29	59.3408
GPER1	-1.56316	4.87974	-12.2561	6.10417e-31	1.91771e-29	59.3304
ZNF366	-1.55739	4.27186	-12.2222	8.51935e-31	2.66157e-29	58.9999
GPR17	-2.03648	3.02688	-12.2221	8.52865e-31	2.66157e-29	58.9988
PIF1	1.56576	4.52433	12.2149	9.14848e-31	2.85121e-29	58.9292
CXCR1	-2.23266	3.5168	-12.2102	9.58595e-31	2.98359e-29	58.8829
IL1RL1	-2.31426	4.32629	-12.2054	1.00401e-30	3.12081e-29	58.837
C8B	-3.20426	3.36851	-12.2019	1.0391e-30	3.22136e-29	58.803
WFDC3	2.04707	5.42952	12.1937	1.12617e-30	3.48668e-29	58.7232
ASNS	0.604723	6.70288	12.1816	1.26841e-30	3.91671e-29	58.6053
TMEM273	-0.922853	6.01442	-12.181	1.2767e-30	3.93712e-29	58.5988
FAM13C	-1.47689	3.99575	-12.18	1.28919e-30	3.97044e-29	58.5892
BRI3BP	0.550266	6.39412	12.1724	1.38856e-30	4.26528e-29	58.5156
MIR497HG	-1.17637	3.35745	-12.1718	1.3969e-30	4.28528e-29	58.5096
GHET1	1.35184	3.67709	12.1672	1.46078e-30	4.4754e-29	58.4653
GMDS	0.57784	6.61153	12.1635	1.51474e-30	4.63468e-29	58.4293
AGTR1	-2.03307	4.05282	-12.152	1.6959e-30	5.16875e-29	58.3173
POC1A	0.777966	6.22822	12.1409	1.89001e-30	5.74544e-29	58.2099
COL24A1	1.40677	3.76195	12.1304	2.09564e-30	6.36228e-29	58.1075
CYP4A22-AS1	1.91605	3.41219	12.1301	2.10079e-30	6.36969e-29	58.1051
SLCO5A1	2.04873	3.46878	12.1272	2.16105e-30	6.54395e-29	58.0771
CCNP	2.43461	4.59817	12.1256	2.19612e-30	6.64156e-29	58.0611
ARMH2	-2.29525	1.42572	-12.0973	2.89625e-30	8.74765e-29	57.7868
METTL1	0.532694	6.79077	12.0746	3.61416e-30	1.0874e-28	57.5673
WFDC12	-3.0386	2.67324	-12.0743	3.62413e-30	1.089e-28	57.5645
VEGFD	-2.64029	5.00847	-12.0657	3.94294e-30	1.18328e-28	57.4809
CCDC69	-0.668592	6.84626	-12.0645	3.98937e-30	1.19569e-28	57.4693
HACD4	-0.891084	5.8713	-12.0477	4.69668e-30	1.4041e-28	57.3075
SELP	-1.3818	5.69904	-12.0367	5.22987e-30	1.55952e-28	57.201
KCNA5	-1.83307	3.25068	-12.0322	5.46463e-30	1.62334e-28	57.1574
MFAP4	-0.827621	7.42317	-12.0291	5.62911e-30	1.67009e-28	57.128
RUNX2	0.908757	5.71166	12.0176	6.2979e-30	1.86615e-28	57.0167
UTRN	-0.592527	6.76601	-12.0147	6.47626e-30	1.91658e-28	56.9891
ITGA8	-1.33077	5.70838	-12.0058	7.06376e-30	2.08781e-28	56.903
FABP5	-0.919535	6.57515	-12.0042	7.17282e-30	2.11738e-28	56.8878
KIR3DL1	-1.87043	1.41004	-12.0012	7.38641e-30	2.17769e-28	56.8587
GNG11	-0.741242	6.88218	-12.0007	7.42094e-30	2.18513e-28	56.8541
OLFML1	-0.922834	6.01011	-11.9982	7.60633e-30	2.23691e-28	56.8296
SNCA	-1.29671	4.60628	-11.9829	8.82539e-30	2.58893e-28	56.6823
LILRA5	-1.28011	5.65888	-11.9808	9.00219e-30	2.6375e-28	56.6626
IL23A	1.11483	5.474	11.9735	9.66878e-30	2.82574e-28	56.5918
PAPSS2	-0.551288	7.24435	-11.971	9.90147e-30	2.89015e-28	56.5683
CEP85	0.517887	6.30585	11.9614	1.08736e-29	3.16996e-28	56.4754
BCL9	0.550548	6.72064	11.9588	1.11528e-29	3.24732e-28	56.4503
KRT27	-2.18101	2.0058	-11.9579	1.12517e-29	3.27206e-28	56.4415
TMED2-DT	1.22024	3.99948	11.9531	1.17816e-29	3.42191e-28	56.3959
GSTA3	-2.80728	2.51064	-11.9503	1.21094e-29	3.51278e-28	56.3687
OSCAR	-1.05008	6.42782	-11.9309	1.46115e-29	4.23335e-28	56.1826
EXD1	-1.42974	1.27585	-11.9261	1.53137e-29	4.43133e-28	56.136
SLC12A9-AS1	1.60537	4.86008	11.9234	1.57208e-29	4.54354e-28	56.11
ZWILCH	0.546126	6.13377	11.9228	1.58027e-29	4.5616e-28	56.1049
TLCD1	0.589962	7.05305	11.9181	1.6536e-29	4.7674e-28	56.0599
OR7E47P	-1.43015	5.49366	-11.9177	1.66094e-29	4.78269e-28	56.0555
PLSCR4	-0.675469	6.55148	-11.9009	1.95385e-29	5.61924e-28	55.8946
FAM86C1P	0.549071	5.89078	11.8977	2.01413e-29	5.77844e-28	55.8644
MVB12B	-0.806509	6.14265	-11.8974	2.02022e-29	5.78884e-28	55.8615
TMTC4	0.556027	6.36563	11.8858	2.2604e-29	6.46914e-28	55.7501
STK39	0.502882	7.04053	11.8788	2.41845e-29	6.91304e-28	55.6831
HOXA4	-1.57992	4.22974	-11.8753	2.50123e-29	7.1323e-28	55.6498
ATP1A2	-2.15937	3.57877	-11.8709	2.61105e-29	7.43642e-28	55.6072
ADAM28	1.20309	5.91859	11.8636	2.80033e-29	7.96584e-28	55.5378
HHIP	-2.94969	4.23092	-11.8573	2.97717e-29	8.45862e-28	55.4771
FAM167A-AS1	-1.76453	1.08787	-11.8486	3.23876e-29	9.17962e-28	55.3937
FAM189A2	-1.67964	5.8217	-11.8456	3.33227e-29	9.43325e-28	55.3655
KLF4	-0.955781	6.72254	-11.8384	3.57242e-29	1.01009e-27	55.2965
PHLDA2	0.836438	7.22067	11.8374	3.60829e-29	1.01901e-27	55.2866
C16orf78	-1.05452	0.415326	-11.8346	3.70746e-29	1.04575e-27	55.2597
SYNPO2	-1.29662	5.18548	-11.8269	3.98986e-29	1.12406e-27	55.187
PARAL1	-2.93669	3.88892	-11.826	4.02569e-29	1.13279e-27	55.1781
NPM3	0.518334	7.26432	11.816	4.43261e-29	1.24431e-27	55.0827
PCYT1B	-2.00481	2.73877	-11.8045	4.95137e-29	1.38828e-27	54.973
ZEB1	-0.769589	6.02476	-11.8033	5.01235e-29	1.4037e-27	54.9609
ADAMTSL4	-1.03677	6.20111	-11.7943	5.462e-29	1.52598e-27	54.8757
ARHGEF6	-0.767628	6.31125	-11.7937	5.49753e-29	1.53408e-27	54.8693
CACNB4	-1.81208	3.15951	-11.7934	5.51203e-29	1.5363e-27	54.8667
LMOD3	-1.24537	2.33779	-11.7927	5.55006e-29	1.54506e-27	54.8599
C18orf63	-1.53873	0.888034	-11.7902	5.68538e-29	1.58086e-27	54.836
GMFG	-0.554095	7.10286	-11.7893	5.73386e-29	1.59245e-27	54.8276
IL22RA2	2.49242	3.26381	11.7878	5.81408e-29	1.61282e-27	54.8138
CCL23	-1.84499	5.12545	-11.7847	5.99198e-29	1.66021e-27	54.784
NTRK2	-2.14836	3.03232	-11.7821	6.14471e-29	1.70052e-27	54.759
AGAP11	-1.45381	1.28281	-11.7746	6.60591e-29	1.826e-27	54.6873
FBXO43	1.52145	2.91412	11.7707	6.85201e-29	1.8918e-27	54.6511
CENPH	0.697645	6.1617	11.7694	6.9398e-29	1.91379e-27	54.6384
SLC5A7	-2.01306	1.22114	-11.7617	7.47217e-29	2.05818e-27	54.5652
KAT2B	-0.604186	6.35875	-11.7558	7.90709e-29	2.17542e-27	54.5091
TERT	2.22971	2.23712	11.7536	8.08097e-29	2.22066e-27	54.4876
ONECUT1	2.4786	2.34035	11.753	8.12847e-29	2.2311e-27	54.4818
CLPSL2	3.07227	3.21213	11.7521	8.19415e-29	2.24495e-27	54.4738
MAP3K15	-1.93927	2.24591	-11.7521	8.19806e-29	2.24495e-27	54.4733
STARD9	-1.40708	4.2356	-11.7518	8.22058e-29	2.24849e-27	54.4706
FFAR4	-1.93827	4.33083	-11.7487	8.46953e-29	2.31389e-27	54.441
KLHL33	-1.57011	1.72584	-11.7454	8.74218e-29	2.3856e-27	54.4096
SCN2B	-1.92894	3.11607	-11.7443	8.83485e-29	2.40809e-27	54.3992
CD300C	-1.27382	5.74806	-11.7394	9.25496e-29	2.51967e-27	54.3531
GIPC2	-1.78701	4.39635	-11.7373	9.44933e-29	2.56735e-27	54.3326
REEP1	-1.87055	4.16253	-11.7372	9.45197e-29	2.56735e-27	54.3323
TMOD1	-1.41141	4.89393	-11.7364	9.53008e-29	2.58557e-27	54.3241
CASP4LP	-1.12619	4.93198	-11.7346	9.69637e-29	2.62462e-27	54.307
DNAJC12	1.82548	6.06617	11.7296	1.0173e-28	2.75047e-27	54.2594
HSD17B6	-1.30687	6.48674	-11.7128	1.19447e-28	3.20729e-27	54.1003
FRMD4B	-0.612219	6.18873	-11.7035	1.30662e-28	3.50443e-27	54.0114
GATA6	-1.11452	6.08167	-11.6968	1.39305e-28	3.72771e-27	53.9479
SPINK1	2.33032	6.5002	11.6944	1.42542e-28	3.81e-27	53.9252
ADGRB3	-1.95875	2.5952	-11.6908	1.47532e-28	3.9389e-27	53.8911
COLGALT2	-1.89072	3.53939	-11.6844	1.56793e-28	4.17663e-27	53.8308
RBBP8NL	1.46721	5.36378	11.6828	1.59268e-28	4.23776e-27	53.8152
B4GALNT4	2.63701	4.78671	11.6809	1.62104e-28	4.30833e-27	53.7977
FHL2	0.972344	6.59867	11.6784	1.66097e-28	4.40945e-27	53.7736
PLA2G4F	-1.87922	5.4643	-11.6764	1.69305e-28	4.48954e-27	53.7547
PRR11	1.08213	6.03853	11.6755	1.7081e-28	4.52433e-27	53.7459
HBA2	-1.78924	6.29044	-11.6751	1.71364e-28	4.53389e-27	53.7427
FLVCR1	0.619217	6.20354	11.6708	1.78503e-28	4.71746e-27	53.7023
LIMD1	-0.546013	6.51003	-11.6698	1.80236e-28	4.75257e-27	53.6927
SCAT8	2.3807	4.55946	11.6673	1.84601e-28	4.86221e-27	53.669
HLX-AS1	-2.08742	1.95354	-11.6534	2.10822e-28	5.54039e-27	53.5374
PTBP1P	1.94442	3.06187	11.6511	2.15564e-28	5.65867e-27	53.5153
ZNF536	-1.282	0.71794	-11.6499	2.17954e-28	5.71503e-27	53.5044
CDCA4	0.574112	6.66273	11.6477	2.22582e-28	5.82336e-27	53.4836
GYG2	1.31387	5.84829	11.6471	2.24054e-28	5.85534e-27	53.4771
LDB3	-1.48331	3.28025	-11.6424	2.34292e-28	6.11609e-27	53.4328
SVEP1	-1.48719	5.31961	-11.6328	2.56816e-28	6.68918e-27	53.3418
SSTR1	-2.2781	4.27991	-11.6309	2.61327e-28	6.79162e-27	53.3246
FAM71A	-0.818774	0.236434	-11.6303	2.62846e-28	6.82354e-27	53.3188
MAG	-2.02747	1.57093	-11.6298	2.64277e-28	6.85311e-27	53.3135
FRY	-0.999739	5.6195	-11.6217	2.85368e-28	7.39185e-27	53.2374
PCDH17	-0.919901	5.92463	-11.6199	2.90396e-28	7.51379e-27	53.2201
AJAP1	-1.51575	1.58463	-11.6157	3.02182e-28	7.81015e-27	53.1806
B3GNT6	3.1767	4.72204	11.6114	3.1473e-28	8.1255e-27	53.1403
CYRIA	-0.813148	6.14778	-11.6033	3.40004e-28	8.75873e-27	53.0638
ELMOD1	-1.55373	1.69725	-11.603	3.40975e-28	8.77413e-27	53.061
CCDC152	-1.16184	4.44799	-11.6018	3.44811e-28	8.85342e-27	53.0499
HMGCLL1	-1.89158	3.21875	-11.5989	3.54466e-28	9.09138e-27	53.0225
KRT4	-2.909	4.37265	-11.5986	3.55701e-28	9.11309e-27	53.0191
HSPB8	-0.871116	6.77853	-11.598	3.57682e-28	9.15385e-27	53.0136
OR1L8	-1.6534	1.58842	-11.5977	3.58567e-28	9.1665e-27	53.0111
CRIM1	-0.54064	6.99883	-11.5818	4.17178e-28	1.06532e-26	52.8611
SENCR	-1.23854	4.2424	-11.5798	4.25303e-28	1.08489e-26	52.842
NRG1	-1.83556	3.47622	-11.5754	4.4359e-28	1.13031e-26	52.8003
NEDD9	-0.649636	7.02782	-11.5699	4.67368e-28	1.18832e-26	52.7486
DGKK	-1.08701	0.466839	-11.5673	4.78982e-28	1.21653e-26	52.7243
RMST	-2.0834	1.50807	-11.5665	4.82626e-28	1.22446e-26	52.7167
BAIAP2L2	1.80535	5.12589	11.5618	5.04765e-28	1.27804e-26	52.6723
CCNO	1.74175	5.95328	11.5535	5.46223e-28	1.38133e-26	52.5941
CCDC34	0.780557	6.03347	11.5496	5.66764e-28	1.43173e-26	52.5575
PLCXD2	-1.69161	3.44205	-11.5465	5.8389e-28	1.47183e-26	52.528
PTPRM	-0.713256	6.50843	-11.5452	5.9109e-28	1.48838e-26	52.5159
DECR2	0.61995	6.46064	11.5438	5.98895e-28	1.50642e-26	52.5029
KCNA10	-1.46174	0.845937	-11.5433	6.01783e-28	1.51206e-26	52.4981
ANKRD34C	-0.832995	0.345819	-11.5352	6.49502e-28	1.63021e-26	52.4225
MTARC2	-0.718838	6.62316	-11.5327	6.65468e-28	1.6685e-26	52.3985
SLC31A2	-1.09984	5.01735	-11.528	6.95403e-28	1.7417e-26	52.3549
ZEB2	-0.90853	5.79905	-11.5248	7.17071e-28	1.79405e-26	52.3245
WFDC1	-1.52494	4.38953	-11.5207	7.45273e-28	1.86065e-26	52.2863
CFD	-0.891368	7.08656	-11.5199	7.51495e-28	1.87418e-26	52.278
IMPDH1P8	1.73137	2.58821	11.5126	8.04744e-28	2.00485e-26	52.2102
PPP5D1	-0.99427	2.18552	-11.5117	8.11718e-28	2.02008e-26	52.2017
GPR89B	0.731985	4.64307	11.5101	8.24695e-28	2.04804e-26	52.1859
P2RX2	-2.18798	2.49941	-11.4938	9.62002e-28	2.38146e-26	52.0334
LMO7	-0.519277	7.16558	-11.4827	1.06866e-27	2.6427e-26	51.9292
GATA1	-1.66312	2.69579	-11.4777	1.1209e-27	2.76898e-26	51.8819
CPB2	-3.05995	4.54522	-11.4775	1.12299e-27	2.77121e-26	51.8801
TNFSF11	2.27919	3.72837	11.4749	1.15087e-27	2.83703e-26	51.8558
TTF2	0.540558	5.77294	11.4695	1.21076e-27	2.97842e-26	51.8055
DCST2	1.62063	4.29657	11.4668	1.24239e-27	3.05304e-26	51.78
LILRA1	-1.35127	3.88358	-11.4653	1.26003e-27	3.08991e-26	51.766
DNMT3B	1.19349	5.09832	11.4609	1.31292e-27	3.21623e-26	51.7253
GEN1	0.785235	5.22388	11.4593	1.33342e-27	3.26305e-26	51.7099
ERICH4	-1.76868	1.76504	-11.4567	1.3671e-27	3.34198e-26	51.6852
BARD1	0.634879	5.82429	11.4536	1.40742e-27	3.43698e-26	51.6564
ATAT1	0.643647	6.1755	11.4521	1.42719e-27	3.48162e-26	51.6426
GRTP1	0.695098	6.30631	11.4499	1.45756e-27	3.55203e-26	51.6218
CEP72	0.719562	5.79438	11.4489	1.4711e-27	3.58129e-26	51.6126
SULF1	0.915313	6.88752	11.4482	1.48058e-27	3.60065e-26	51.6062
PPP1R14BP2	2.28318	3.09284	11.4413	1.58081e-27	3.84042e-26	51.5413
MUSK	-1.84575	2.07065	-11.4389	1.61636e-27	3.91867e-26	51.5193
REM1	-1.25428	4.72571	-11.4358	1.66533e-27	4.03322e-26	51.4897
TSLP	-1.82303	2.67612	-11.4354	1.67173e-27	4.04455e-26	51.4859
ZDHHC19	-1.78131	2.20276	-11.4335	1.70103e-27	4.1112e-26	51.4687
SLC17A9	1.22373	5.98544	11.4297	1.76432e-27	4.25977e-26	51.4325
RFLNB	-0.592511	6.48119	-11.4195	1.94218e-27	4.68438e-26	51.3374
CELA2B	-1.59499	2.4237	-11.4175	1.97923e-27	4.76885e-26	51.3187
KCNK3	-1.89905	5.20934	-11.4165	1.99649e-27	4.8055e-26	51.3101
VEPH1	-1.9313	5.39857	-11.4124	2.0753e-27	4.97478e-26	51.2717
NCF2	-0.632273	7.07187	-11.4118	2.08848e-27	5.00127e-26	51.2655
CHTF18	0.996827	5.86001	11.4098	2.12729e-27	5.08901e-26	51.2472
ADCK5	0.766053	6.33388	11.4092	2.13976e-27	5.11362e-26	51.2414
ICAM2	-0.733427	6.23821	-11.4084	2.15653e-27	5.14847e-26	51.2337
ZNF92	0.515556	6.21283	11.4024	2.28198e-27	5.44242e-26	51.1777
ALOX5	-0.702847	7.01564	-11.3989	2.35775e-27	5.61743e-26	51.1453
ZP3	1.32034	5.53594	11.3962	2.41782e-27	5.7547e-26	51.1204
SNHG3	0.649347	6.59947	11.3716	3.0475e-27	7.23874e-26	50.8911
CYTOR	0.7317	6.21307	11.3673	3.17514e-27	7.5343e-26	50.8505
SCG5	1.5928	5.76506	11.3601	3.39688e-27	8.05232e-26	50.7836
HNRNPA1P33	-2.17727	1.85987	-11.3577	3.47497e-27	8.22913e-26	50.7611
CADM3-AS1	-1.87706	2.16608	-11.3557	3.54102e-27	8.37709e-26	50.7425
DES	-1.79273	5.88964	-11.345	3.91498e-27	9.24314e-26	50.643
PGM5P4	-2.62437	3.24936	-11.3404	4.0874e-27	9.64051e-26	50.6003
HLX	-0.822408	5.54743	-11.3402	4.09416e-27	9.64676e-26	50.5987
OR7E11P	-1.79781	1.11566	-11.332	4.4243e-27	1.04142e-25	50.5219
S100A3	-1.37169	5.44842	-11.3312	4.45574e-27	1.04777e-25	50.5149
FGF11	1.84736	2.68142	11.3297	4.51905e-27	1.06159e-25	50.5009
INSC	-1.99093	2.10878	-11.325	4.72436e-27	1.10871e-25	50.4569
TAS2R2P	2.23031	2.0648	11.3155	5.1636e-27	1.21058e-25	50.3688
ALOX5AP	-0.673818	7.25681	-11.3147	5.20304e-27	1.21861e-25	50.3613
CFAP161	-2.11246	3.10883	-11.3099	5.44258e-27	1.27218e-25	50.3167
RGS9BP	-1.67129	2.51271	-11.3044	5.72802e-27	1.33756e-25	50.2661
SLC1A1	-1.22048	6.2328	-11.2961	6.19243e-27	1.44171e-25	50.1889
SLC26A6	0.707992	6.02877	11.2907	6.51484e-27	1.51325e-25	50.1386
MIR924HG	2.16148	2.89698	11.2906	6.51909e-27	1.51325e-25	50.138
GAD1	2.28654	3.18202	11.2804	7.17332e-27	1.66019e-25	50.0432
SYNGR4	2.28089	2.73943	11.2738	7.63267e-27	1.76476e-25	49.9818
PRICKLE2	-0.895569	5.63042	-11.2708	7.85007e-27	1.81324e-25	49.9539
SASS6	0.71204	5.64055	11.2681	8.04491e-27	1.85642e-25	49.9297
MYOSLID	2.00011	4.27403	11.267	8.13316e-27	1.87494e-25	49.9189
PABPC1L	1.08629	6.36888	11.253	9.26602e-27	2.13191e-25	49.7897
ZFYVE9	-0.67058	6.24149	-11.2508	9.46443e-27	2.17543e-25	49.7687
MSTO2P	0.9166	5.62562	11.2485	9.6696e-27	2.22041e-25	49.7475
ATP6V1C2	1.36028	5.40076	11.2438	1.01051e-26	2.31814e-25	49.7039
ABCG1	-0.659315	6.65189	-11.2371	1.07533e-26	2.46445e-25	49.6423
TARID	-1.96311	2.31769	-11.235	1.09667e-26	2.51089e-25	49.6228
URB1	0.50635	6.44601	11.221	1.24977e-26	2.85586e-25	49.4934
TOX2	-1.0343	5.72861	-11.1959	1.5785e-26	3.59304e-25	49.2621
LMOD1	-0.927095	6.2875	-11.1939	1.60891e-26	3.65872e-25	49.2432
LGI2	1.47189	5.14789	11.1899	1.67047e-26	3.79503e-25	49.2061
PCDH10	-1.64815	1.72368	-11.1858	1.73547e-26	3.93888e-25	49.1682
MYL3	-1.60984	3.58757	-11.1783	1.8605e-26	4.21858e-25	49.0994
TNFRSF25	1.10555	5.94693	11.1718	1.97668e-26	4.47767e-25	49.0394
BBOX1-AS1	3.02497	3.73686	11.1708	1.99512e-26	4.5151e-25	49.0302
CA2	-0.95292	6.65866	-11.1697	2.0146e-26	4.55478e-25	49.0206
RSPO4	-2.25902	4.22932	-11.1694	2.02019e-26	4.56303e-25	49.0178
FGFR4	-1.61857	5.72955	-11.1672	2.06289e-26	4.64604e-25	48.9971
FIBIN	-1.13391	6.17546	-11.166	2.0853e-26	4.69202e-25	48.9864
FEZF1	2.8846	3.65663	11.1629	2.14711e-26	4.82647e-25	48.9575
ADGRA1	-1.61739	0.933821	-11.1596	2.21255e-26	4.9688e-25	48.9277
GRM3	-1.24616	1.15808	-11.1579	2.24897e-26	5.04578e-25	48.9116
TUBB6	-0.569671	6.97404	-11.1555	2.29903e-26	5.14567e-25	48.8898
IL5RA	-2.07538	3.24299	-11.1555	2.30007e-26	5.14567e-25	48.8893
KCTD12	-0.504976	7.23884	-11.1533	2.34694e-26	5.24552e-25	48.8693
CCRL2	-0.983298	5.884	-11.151	2.39838e-26	5.35539e-25	48.8479
NES	-0.699871	6.76786	-11.1479	2.46739e-26	5.50426e-25	48.8198
SGO2	0.908537	5.4382	11.1429	2.58616e-26	5.75826e-25	48.7732
CHRNA4	-0.738338	0.338771	-11.1402	2.65048e-26	5.89586e-25	48.7489
STEAP1	1.09157	6.69539	11.1388	2.68446e-26	5.96582e-25	48.7363
PTGER4	-0.917508	6.18097	-11.136	2.75543e-26	6.11773e-25	48.7104
MRAS	-0.605436	6.23538	-11.1352	2.77777e-26	6.1615e-25	48.7024
KCNE1B	-1.76144	1.36617	-11.1286	2.95111e-26	6.53364e-25	48.6425
CYP7A1	-0.883098	0.710977	-11.1281	2.96648e-26	6.56149e-25	48.6374
IGHG4	0.860717	7.7891	11.1255	3.03848e-26	6.71442e-25	48.6136
NTN4	-0.681287	6.98455	-11.1225	3.12408e-26	6.89707e-25	48.5861
PICSAR	-2.84466	2.48642	-11.1171	3.2844e-26	7.2374e-25	48.5365
KLHL41	-1.40524	3.00583	-11.1171	3.2844e-26	7.2374e-25	48.5365
APBB1	-0.758591	6.30436	-11.1102	3.50247e-26	7.68904e-25	48.4729
NEXN	-0.877601	5.98259	-11.1072	3.59866e-26	7.89284e-25	48.4461
ACOXL	-1.8188	4.59155	-11.1048	3.68231e-26	8.06876e-25	48.4233
F10	-1.25131	5.21664	-11.0991	3.87878e-26	8.49134e-25	48.3718
C20orf144	1.41483	3.1823	11.0896	4.2376e-26	9.2596e-25	48.2842
PDZRN4	-1.82126	2.16642	-11.0875	4.32112e-26	9.43332e-25	48.2649
CCDC169	1.74088	2.63721	11.0872	4.33289e-26	9.4502e-25	48.2622
KRT16	2.95527	4.46073	11.0787	4.68656e-26	1.02121e-24	48.1845
HNRNPA1P21	1.29503	5.16454	11.075	4.85081e-26	1.05602e-24	48.1504
ADAM8	0.7501	6.86903	11.0598	5.57984e-26	1.21248e-24	48.0118
INSYN1	-1.81543	3.46532	-11.047	6.28246e-26	1.36389e-24	47.8943
RIPOR1	-0.52838	6.80621	-11.0444	6.434e-26	1.3955e-24	47.8707
PID1	-1.09499	6.26021	-11.0429	6.5247e-26	1.41387e-24	47.8569
PDE1C	-1.78471	3.39925	-11.0422	6.57054e-26	1.42248e-24	47.8499
ARRB1	-0.546893	6.89242	-11.0342	7.07039e-26	1.52929e-24	47.7773
RBMS3	-1.14434	5.48991	-11.0298	7.3608e-26	1.59064e-24	47.7375
CYP27A1	-0.625541	7.23477	-11.0272	7.54312e-26	1.62704e-24	47.7133
AKR7A3	2.12941	5.09015	11.0167	8.31339e-26	1.78662e-24	47.617
FBXO41	1.07409	5.44481	11.0102	8.82115e-26	1.894e-24	47.5583
HYAL1	-1.27014	6.2167	-11.0087	8.94241e-26	1.91829e-24	47.5448
GAS1RR	-1.38236	1.94625	-11.0082	8.98833e-26	1.92638e-24	47.5397
JAML	-1.05361	5.97045	-11.0072	9.07283e-26	1.94271e-24	47.5304
GUCA2A	-2.77364	2.30884	-10.9977	9.89883e-26	2.11765e-24	47.4442
CIP2A	1.07321	5.48567	10.9936	1.02847e-25	2.19818e-24	47.4063
BLACAT1	1.87741	5.0115	10.9919	1.04412e-25	2.22817e-24	47.3914
SIX1	1.67284	5.88663	10.9919	1.0444e-25	2.22817e-24	47.3911
PHOSPHO1	-1.39013	3.75558	-10.9867	1.09559e-25	2.33527e-24	47.3437
PSMD10P2	2.39528	2.58296	10.9839	1.12414e-25	2.39395e-24	47.3183
SLC7A7	-0.676683	6.67811	-10.9831	1.13211e-25	2.40873e-24	47.3113
SLC22A10	-1.17823	0.745993	-10.9746	1.22474e-25	2.60346e-24	47.2334
COL5A2	0.637815	7.20229	10.9568	1.44251e-25	3.06084e-24	47.0714
TMEM150B	-1.24257	5.54103	-10.9553	1.46161e-25	3.09856e-24	47.0584
EFEMP1	-0.595557	7.34908	-10.9515	1.51461e-25	3.20802e-24	47.0231
FANCB	1.27818	3.87987	10.9499	1.53641e-25	3.25126e-24	47.0089
SPATA19	-1.06935	0.36609	-10.9442	1.61855e-25	3.42199e-24	46.9574
CP	1.11393	7.18642	10.9408	1.67087e-25	3.52942e-24	46.9259
HSH2D	0.656837	6.55675	10.9401	1.68055e-25	3.54668e-24	46.9202
GATA2	-0.997493	5.98156	-10.9294	1.85386e-25	3.90561e-24	46.823
AARSD1	0.62147	5.45143	10.9294	1.85395e-25	3.90561e-24	46.823
RNU6-917P	-2.91476	1.97341	-10.9161	2.09516e-25	4.40584e-24	46.7019
LRRC8C	-0.738831	5.64745	-10.915	2.11577e-25	4.4452e-24	46.6922
RASGRF1	-2.13088	4.84589	-10.9139	2.13745e-25	4.48672e-24	46.6821
ARHGAP40	2.31929	5.22328	10.9003	2.42061e-25	5.07204e-24	46.5589
SHANK3	-0.701084	6.16651	-10.8948	2.54505e-25	5.32804e-24	46.5093
S1PR5	-1.49959	3.68774	-10.8931	2.58705e-25	5.41112e-24	46.4931
LRCH1	-0.522997	6.13894	-10.8926	2.59868e-25	5.43062e-24	46.4887
FUT8	0.515761	6.79338	10.8877	2.71705e-25	5.66788e-24	46.4446
TRMU	0.512761	6.02334	10.8833	2.82805e-25	5.89421e-24	46.4049
IL11	1.86459	3.75221	10.8818	2.8681e-25	5.97237e-24	46.391
TLR4	-0.916174	6.18489	-10.877	2.99721e-25	6.23017e-24	46.3474
OSTN	-1.2484	0.714647	-10.8715	3.15182e-25	6.53996e-24	46.2976
INAVA	0.958601	6.54612	10.8681	3.25157e-25	6.7291e-24	46.2668
PIK3R1	-0.524586	6.45517	-10.864	3.37442e-25	6.97717e-24	46.2301
TRPM1	-0.820156	0.429911	-10.8517	3.77546e-25	7.7858e-24	46.1189
TRPC3	-1.40931	2.42826	-10.8452	4.00729e-25	8.22774e-24	46.0599
GCSH	0.608088	5.75026	10.8415	4.14451e-25	8.50203e-24	46.0266
ZBED2	-1.52333	5.42948	-10.8385	4.26028e-25	8.7289e-24	45.9993
NOSTRIN	-0.983747	5.83898	-10.8384	4.26254e-25	8.7289e-24	45.9988
MYOCD	-1.97794	3.017	-10.8355	4.3757e-25	8.94502e-24	45.9729
DOCK11	-0.757471	6.24976	-10.8341	4.43271e-25	9.05369e-24	45.96
FAM181A	-2.53269	2.661	-10.8311	4.55634e-25	9.2981e-24	45.9328
LIMCH1	-0.630569	7.05054	-10.8298	4.61246e-25	9.40445e-24	45.9207
KCNJ5	-1.58038	4.9894	-10.8291	4.64063e-25	9.45367e-24	45.9147
GPC5	-2.31595	3.28533	-10.8281	4.68265e-25	9.531e-24	45.9058
SNORD60	2.35211	5.01554	10.816	5.2288e-25	1.0615e-23	45.7966
FAM72B	1.59184	3.47549	10.8119	5.42723e-25	1.10083e-23	45.7597
HOXA5	-0.843752	6.06421	-10.8083	5.61094e-25	1.13711e-23	45.7267
TMEM132A	0.849896	6.52539	10.8074	5.65207e-25	1.14446e-23	45.7195
BCL2L10	2.32948	3.22586	10.7961	6.26835e-25	1.26488e-23	45.6171
ADGRL4	-0.587043	6.45453	-10.7894	6.65793e-25	1.34234e-23	45.5574
WDR88	1.08862	4.30944	10.7828	7.07096e-25	1.42439e-23	45.4978
H1-4	2.13781	4.01729	10.7794	7.2952e-25	1.4683e-23	45.4669
DUBR	-1.00846	4.77004	-10.7752	7.57682e-25	1.52367e-23	45.4294
COL22A1	1.96993	3.61158	10.7648	8.33239e-25	1.67418e-23	45.3353
LRRC18	-2.34603	3.08342	-10.7603	8.67386e-25	1.7413e-23	45.2956
DNAJB4	-0.626975	6.42571	-10.7566	8.97453e-25	1.79858e-23	45.2619
ABCC3	0.797677	7.14035	10.7531	9.26317e-25	1.85485e-23	45.2305
KCNJ8	-0.760938	6.40359	-10.7476	9.74034e-25	1.94873e-23	45.1808
BST1	-0.848579	5.77688	-10.7433	1.01217e-24	2.02158e-23	45.1428
MELTF	1.34913	5.43156	10.724	1.20583e-24	2.40632e-23	44.9695
ID4	-0.995598	6.52693	-10.7166	1.28951e-24	2.57113e-23	44.9031
TSPAN7	-1.21699	6.36269	-10.7095	1.37543e-24	2.74013e-23	44.8393
SLC16A11	-1.54306	4.93185	-10.7029	1.45964e-24	2.90542e-23	44.7805
SH3BP5	-0.80867	6.06818	-10.6875	1.67846e-24	3.32686e-23	44.6422
RGR	-0.643795	0.260889	-10.6857	1.7056e-24	3.37781e-23	44.6264
ANXA8	-2.48838	2.9893	-10.6834	1.74114e-24	3.44528e-23	44.606
GRID1	-1.35506	3.64028	-10.6777	1.83366e-24	3.62226e-23	44.5547
FGF14-AS2	-1.3531	4.93065	-10.6762	1.85812e-24	3.66747e-23	44.5416
PLPP4	2.36702	4.17159	10.6741	1.89379e-24	3.73475e-23	44.5228
PLAC1	2.39977	2.87469	10.6683	1.99495e-24	3.92434e-23	44.4713
ANKRD29	-1.61993	5.60225	-10.6649	2.05735e-24	4.0437e-23	44.4408
ACRV1	1.55804	2.26636	10.6632	2.09016e-24	4.10476e-23	44.4252
PUS7L	0.50528	5.63458	10.6613	2.12558e-24	4.17082e-23	44.4085
TLL1	-1.41275	3.87784	-10.6607	2.13757e-24	4.19084e-23	44.403
ADGRF4	2.56939	4.28271	10.6605	2.1411e-24	4.19426e-23	44.4013
MIR4717	-2.60242	1.10075	-10.6564	2.22269e-24	4.35046e-23	44.3643
S1PR4	-0.942695	6.17888	-10.6525	2.30169e-24	4.48638e-23	44.3298
ENTPD7	0.544655	6.31007	10.651	2.33359e-24	4.54102e-23	44.3161
LRRC37A14P	-2.02761	2.19333	-10.6473	2.41141e-24	4.68856e-23	44.2837
RETN	-2.17641	5.39587	-10.6415	2.5403e-24	4.931e-23	44.2321
ABCB9	0.88695	4.60695	10.6396	2.58631e-24	5.01616e-23	44.2144
KANK4	-1.87586	3.73155	-10.6373	2.63886e-24	5.10963e-23	44.1945
FABP12	-1.54716	0.722213	-10.627	2.89667e-24	5.6042e-23	44.1022
SELENOP	-0.678827	7.10634	-10.6223	3.02078e-24	5.8367e-23	44.0607
SCN1A	-2.29015	3.21638	-10.6223	3.02181e-24	5.8367e-23	44.0604
AGTR2	-3.1532	3.97594	-10.616	3.19704e-24	6.17007e-23	44.0046
SUZ12P1	0.635935	5.80733	10.6092	3.39962e-24	6.5449e-23	43.9438
GALNT18	-0.645807	6.75402	-10.5998	3.69903e-24	7.10966e-23	43.8603
TRPM8	2.705	2.92366	10.5975	3.77652e-24	7.25265e-23	43.8398
LPL	-1.21142	6.61042	-10.5958	3.83608e-24	7.36101e-23	43.8243
PILRA	-0.770917	6.49359	-10.5885	4.09355e-24	7.84864e-23	43.76
MYOM2	-1.46383	3.36488	-10.5861	4.18346e-24	8.01449e-23	43.7385
CASKIN1	1.89649	2.44292	10.5839	4.26805e-24	8.16321e-23	43.7187
NFIX	-0.666305	6.9408	-10.5802	4.40918e-24	8.41942e-23	43.6865
SYPL1P2	1.55864	3.95415	10.5775	4.51755e-24	8.61934e-23	43.6625
NATD1	-0.669428	6.17002	-10.5756	4.59749e-24	8.76474e-23	43.6451
PTGIR	-0.868781	5.43641	-10.5754	4.60605e-24	8.77393e-23	43.6433
SLC46A2	-2.04904	5.00772	-10.5733	4.69221e-24	8.92401e-23	43.6249
PTGFR	-1.97801	3.8843	-10.5733	4.6931e-24	8.92401e-23	43.6248
GJA5	-0.700375	6.72354	-10.5732	4.69625e-24	8.92401e-23	43.6241
BEAN1	1.71564	4.71196	10.5584	5.36376e-24	1.01677e-22	43.4926
ZNF695	2.26959	2.76811	10.5569	5.43577e-24	1.02959e-22	43.4794
AQP1	-0.638219	7.71854	-10.5524	5.66211e-24	1.07074e-22	43.439
SHROOM4	-1.08927	5.80048	-10.5474	5.92143e-24	1.11797e-22	43.3947
ATP1B2	-1.36946	4.51193	-10.5452	6.03498e-24	1.1385e-22	43.3759
MRC1	-0.970851	6.98506	-10.5393	6.36279e-24	1.19937e-22	43.3236
GALNT13	-2.33123	3.40284	-10.5343	6.65919e-24	1.25323e-22	43.2785
CHRNB4	1.74218	2.1765	10.5339	6.68047e-24	1.25623e-22	43.2754
CLDN11	-1.4473	4.5003	-10.5315	6.82561e-24	1.28147e-22	43.2541
NPNT	-0.895679	6.83549	-10.5143	7.96236e-24	1.49369e-22	43.1017
PREX1	-0.541211	6.69692	-10.5129	8.06108e-24	1.511e-22	43.0895
FILIP1	-1.34777	5.34019	-10.5057	8.5966e-24	1.60918e-22	43.0259
ITIH3	-1.30539	3.53341	-10.5057	8.59858e-24	1.60918e-22	43.0257
KHDRBS2	-2.19284	4.24728	-10.504	8.72984e-24	1.63244e-22	43.0107
LPA	-0.95214	0.526389	-10.5036	8.76379e-24	1.63619e-22	43.0068
CLEC12A	-1.49564	5.15006	-10.5018	8.89805e-24	1.65993e-22	42.9918
TMEM63C	2.32853	4.54257	10.4959	9.38512e-24	1.7494e-22	42.9391
HMBS	0.507894	6.63009	10.4936	9.57653e-24	1.78367e-22	42.9191
ACACB	-0.966745	5.07061	-10.4897	9.9141e-24	1.84508e-22	42.8848
RPL23AP77	2.54006	3.24072	10.4894	9.94028e-24	1.84848e-22	42.8822
TUBA5P	1.39715	5.30059	10.4818	1.06402e-23	1.97551e-22	42.8149
ARHGAP29	-0.687112	6.1864	-10.4802	1.0799e-23	2.00341e-22	42.8002
MMP19	-0.873899	6.18589	-10.4799	1.08219e-23	2.00606e-22	42.7981
RADX	-1.56974	4.11955	-10.4788	1.09302e-23	2.02454e-22	42.7883
C15orf48	0.90249	7.15778	10.4711	1.17059e-23	2.1648e-22	42.7204
ASPRV1	-0.944395	4.1269	-10.4704	1.17762e-23	2.1761e-22	42.7145
TMEM220	-1.02529	5.38097	-10.4703	1.17908e-23	2.17708e-22	42.7133
PRDM5	-1.02795	4.49246	-10.4691	1.19234e-23	2.19982e-22	42.7022
PRIMA1	-2.09243	2.43689	-10.4682	1.20093e-23	2.21394e-22	42.6951
GJA4	-0.689767	6.45233	-10.4669	1.21576e-23	2.23951e-22	42.683
SCAT2	1.60447	4.24618	10.4637	1.25049e-23	2.30168e-22	42.6551
CREB3L4	0.516101	6.75476	10.4614	1.27598e-23	2.34676e-22	42.6352
PACRG-AS1	-1.14563	0.738225	-10.4557	1.34321e-23	2.46847e-22	42.5844
KCNE1	-1.61869	2.73665	-10.4494	1.42078e-23	2.60694e-22	42.5288
H2BC19P	1.62693	3.68301	10.4489	1.42629e-23	2.61501e-22	42.525
WNT2B	-1.06981	3.82322	-10.4391	1.5573e-23	2.85076e-22	42.4381
RTN1	-1.33354	5.04679	-10.4369	1.58835e-23	2.90306e-22	42.4185
CLDN18	-2.72491	5.76451	-10.4349	1.61587e-23	2.95108e-22	42.4015
HMGN2P15	-1.59395	4.82291	-10.4343	1.62515e-23	2.96571e-22	42.3959
IL7R	-0.856469	6.74005	-10.4287	1.70709e-23	3.11281e-22	42.3472
PCCA-DT	0.727381	6.42463	10.4258	1.7522e-23	3.19012e-22	42.3214
SLC22A18AS	1.32483	5.48301	10.419	1.86189e-23	3.38457e-22	42.2613
ALPP	-2.51573	3.46204	-10.4181	1.87663e-23	3.40347e-22	42.2535
PACSIN1	1.68365	3.71557	10.4124	1.97338e-23	3.57616e-22	42.2038
FAR2	-0.964631	5.4461	-10.4119	1.98278e-23	3.59043e-22	42.1991
TEX11	1.53748	1.84877	10.4097	2.02241e-23	3.65936e-22	42.1795
GKN2	-3.06193	4.73629	-10.4088	2.03894e-23	3.68643e-22	42.1715
ANXA3	-0.834999	6.85128	-10.4069	2.0722e-23	3.74368e-22	42.1555
TM6SF1	-1.03112	5.43316	-10.4054	2.1002e-23	3.79135e-22	42.1422
SIGLEC17P	-1.64449	4.0912	-10.4027	2.15244e-23	3.88267e-22	42.1179
GET4	0.687268	5.11194	10.4015	2.1749e-23	3.92016e-22	42.1076
P2RY14	-1.02958	5.32127	-10.397	2.26343e-23	4.0766e-22	42.0682
ACY3	1.56428	5.39681	10.3958	2.28767e-23	4.1171e-22	42.0576
NALCN-AS1	-1.70503	1.56209	-10.3932	2.34156e-23	4.21087e-22	42.0346
RRP7BP	0.743139	5.15523	10.3818	2.59019e-23	4.65085e-22	41.9348
SGCA	-1.4977	5.32845	-10.3795	2.64264e-23	4.7414e-22	41.9149
MEIS1	-0.781189	5.38148	-10.3791	2.65287e-23	4.75611e-22	41.9111
FBXL19	0.540107	6.53775	10.379	2.65541e-23	4.75704e-22	41.9102
LEFTY2	-2.12443	3.4995	-10.3693	2.89246e-23	5.17775e-22	41.8256
PLLP	-0.982429	6.08556	-10.3667	2.96124e-23	5.29506e-22	41.8023
C1orf115	-0.818337	6.5748	-10.3666	2.96251e-23	5.29506e-22	41.8019
PPP1R17	-1.27901	0.8274	-10.3573	3.21661e-23	5.73612e-22	41.7205
PPP4R4	-1.94344	3.39879	-10.3566	3.23637e-23	5.76698e-22	41.7145
ZNF252P-AS1	1.36873	2.60858	10.356	3.25547e-23	5.79661e-22	41.7086
LIFR	-0.825594	6.47175	-10.3486	3.47361e-23	6.17099e-22	41.6445
SLC24A2	1.79487	1.82745	10.3438	3.62533e-23	6.43078e-22	41.6022
PRG4	-2.08817	4.66922	-10.34	3.74932e-23	6.64569e-22	41.5689
CD68	-1.08733	5.14739	-10.3386	3.79581e-23	6.72303e-22	41.5567
SNORA73B	1.10517	6.08936	10.3373	3.84154e-23	6.7989e-22	41.5449
GSDMB	0.880323	6.17454	10.3311	4.05617e-23	7.15717e-22	41.4911
TRAF5	0.704647	5.9826	10.3299	4.09803e-23	7.22558e-22	41.481
SYP	-1.36405	4.32862	-10.3256	4.25893e-23	7.50364e-22	41.4429
TEX14	-1.06932	3.10471	-10.3238	4.32572e-23	7.6156e-22	41.4275
MITF	-0.808303	5.77855	-10.3232	4.34964e-23	7.65197e-22	41.422
STON1	-0.898283	5.16333	-10.3196	4.48975e-23	7.88664e-22	41.3907
RAB44	-1.46169	2.56716	-10.3007	5.30666e-23	9.31463e-22	41.2253
EPHX4	1.64645	4.96138	10.2984	5.4127e-23	9.49367e-22	41.2058
BNIP3P11	1.27128	5.35659	10.2928	5.68896e-23	9.95589e-22	41.1565
DHRS13	0.709208	5.60201	10.2918	5.73683e-23	1.00322e-21	41.1482
RPGR	-0.646186	5.46146	-10.2908	5.78838e-23	1.01148e-21	41.1394
PALD1	-0.658903	6.24755	-10.2896	5.84956e-23	1.02123e-21	41.129
EIF4E3	-0.648915	6.04484	-10.2895	5.85286e-23	1.02123e-21	41.1284
FLT4	-0.798434	5.83302	-10.2857	6.0521e-23	1.05442e-21	41.0953
ARHGAP39	0.717562	6.11752	10.2805	6.34015e-23	1.10297e-21	41.0493
SORD	0.67395	6.19424	10.2793	6.40746e-23	1.11351e-21	41.0389
CYGB	-0.604961	6.50523	-10.2786	6.44815e-23	1.11927e-21	41.0326
AKAP7	-0.813109	5.33503	-10.2736	6.73314e-23	1.16701e-21	40.9899
THNSL1	0.54564	6.02932	10.2667	7.15881e-23	1.23925e-21	40.9292
ADAMTS15	-1.41078	4.6754	-10.2666	7.16048e-23	1.23925e-21	40.929
SIGLEC18P	-1.64102	1.95312	-10.2636	7.35388e-23	1.27037e-21	40.9026
KREMEN2	1.73902	3.61098	10.2606	7.5486e-23	1.30258e-21	40.8768
GAS6-DT	-1.22542	4.10408	-10.2556	7.89175e-23	1.35979e-21	40.8328
NPR3	-1.15167	5.5932	-10.2529	8.07714e-23	1.38969e-21	40.8099
P3H2	-1.36174	6.11395	-10.2347	9.48011e-23	1.62869e-21	40.6515
SPP2	2.65483	2.59349	10.2322	9.6917e-23	1.66261e-21	40.6297
P2RX6	-1.48019	2.15143	-10.2299	9.88738e-23	1.69494e-21	40.6099
MSH5	1.32193	4.35514	10.217	1.10706e-22	1.895e-21	40.4981
CLDN10-AS1	3.31871	3.64241	10.2091	1.18708e-22	2.0305e-21	40.4291
SLC2A9	-0.902656	4.7001	-10.2045	1.23614e-22	2.10827e-21	40.389
NXPE3	-0.673273	5.79645	-10.2018	1.26482e-22	2.15561e-21	40.3664
TCF4	-0.732173	5.86242	-10.1945	1.34932e-22	2.29463e-21	40.3024
C11orf96	-0.698096	6.90601	-10.1932	1.36426e-22	2.31835e-21	40.2915
IRX1	-2.78882	3.65922	-10.1886	1.42017e-22	2.41163e-21	40.2518
GGTA1	-0.957793	5.66737	-10.1842	1.47579e-22	2.49883e-21	40.2138
MROH6	0.939547	6.57989	10.1814	1.51259e-22	2.55562e-21	40.1895
STAC	-1.68079	5.19533	-10.1808	1.5209e-22	2.56781e-21	40.184
LYPD2	-2.3917	2.15107	-10.1799	1.53209e-22	2.58309e-21	40.1768
ABLIM3	-1.04915	5.78165	-10.1799	1.53215e-22	2.58309e-21	40.1767
IQCC	0.55041	5.79791	10.1794	1.53919e-22	2.59309e-21	40.1722
SCARF1	-0.683857	6.239	-10.1752	1.597e-22	2.68855e-21	40.1358
MTG1	0.647889	5.56531	10.1729	1.62889e-22	2.74028e-21	40.1162
CLDN24	-1.70106	1.02509	-10.1676	1.70712e-22	2.86981e-21	40.0698
SLC9A7	0.619846	6.01776	10.1451	2.07662e-22	3.48101e-21	39.8761
PYCR3	0.563386	6.62095	10.1447	2.08468e-22	3.49203e-21	39.8722
SCIMP	-1.08162	5.63035	-10.1435	2.10656e-22	3.52617e-21	39.8619
RDM1P5	1.193	2.60828	10.1409	2.15503e-22	3.60215e-21	39.8394
SLC15A3	-0.634378	6.71607	-10.1372	2.226e-22	3.7155e-21	39.8074
CDC14A	-0.742531	5.49603	-10.1363	2.24382e-22	3.74258e-21	39.7995
YBX2	2.47293	3.83099	10.1356	2.25743e-22	3.7626e-21	39.7935
CBX2	1.25882	5.57928	10.1343	2.28306e-22	3.79992e-21	39.7824
EGR2	-0.868795	6.18842	-10.1306	2.35767e-22	3.92131e-21	39.7506
TMEM105	1.44653	4.60929	10.1276	2.41954e-22	4.02137e-21	39.725
MFSD2A	-0.772446	6.8317	-10.1252	2.47064e-22	4.1005e-21	39.7043
IGFBP3	0.535572	7.57415	10.1245	2.48645e-22	4.12382e-21	39.698
MAFF	-0.518287	6.57066	-10.1176	2.63966e-22	4.37175e-21	39.6389
COL5A1	0.610178	7.21105	10.1148	2.70483e-22	4.47651e-21	39.6147
RPL39L	0.814762	6.78604	10.114	2.7236e-22	4.50441e-21	39.6079
GPR4	-0.851965	5.81277	-10.111	2.79664e-22	4.61868e-21	39.5817
SPI1	-0.586502	7.19657	-10.1068	2.90045e-22	4.78676e-21	39.5457
ARHGAP44	-1.10765	5.82305	-10.1037	2.98009e-22	4.91474e-21	39.5189
AGBL1-AS1	-1.04136	0.415839	-10.1021	3.02074e-22	4.97828e-21	39.5055
KAZN	-1.16269	4.70608	-10.0975	3.14393e-22	5.1704e-21	39.466
DCN	-0.513949	7.37835	-10.0963	3.17915e-22	5.22467e-21	39.455
FABP5P1	-1.92732	1.91353	-10.0945	3.22705e-22	5.29967e-21	39.4402
CCDC102B	-0.747212	5.36771	-10.0921	3.29617e-22	5.4094e-21	39.4193
NPY5R	-1.34582	0.85799	-10.0847	3.5141e-22	5.76303e-21	39.356
OR6K5P	-0.538576	0.111967	-10.0841	3.53435e-22	5.79219e-21	39.3503
DAB2	-0.512791	6.83667	-10.0744	3.84301e-22	6.28048e-21	39.2675
OLA1P1	0.804803	4.86494	10.069	4.0301e-22	6.58166e-21	39.2205
SEPTIN10P1	-1.36565	2.4872	-10.0613	4.30885e-22	7.0271e-21	39.1544
BEND3P2	-1.06498	0.67669	-10.0598	4.36216e-22	7.10418e-21	39.1422
ECEL1	2.26534	3.54759	10.0559	4.51221e-22	7.34345e-21	39.1088
PAK5	-1.28555	0.87232	-10.0539	4.59165e-22	7.46755e-21	39.0915
APOLD1	-0.78462	6.01767	-10.0428	5.0563e-22	8.21754e-21	38.9962
RASSF2	-0.607573	6.60632	-10.0373	5.30406e-22	8.60827e-21	38.9489
MXD3	0.896582	5.30236	10.0359	5.36819e-22	8.70634e-21	38.9371
TTC7B	-0.760324	4.74424	-10.0308	5.60863e-22	9.07747e-21	38.8937
OR8T1P	-1.44788	2.22859	-10.0298	5.66056e-22	9.15521e-21	38.8846
TTC39C	0.644043	6.22723	10.0256	5.86786e-22	9.47373e-21	38.8491
ZHX3	-0.506685	6.03563	-10.0241	5.9445e-22	9.58142e-21	38.8362
ZNF587	0.561662	6	10.0237	5.96678e-22	9.61073e-21	38.8325
FAM180B	-1.39628	1.24737	-10.0185	6.24333e-22	1.00493e-20	38.7878
NKD1	-1.5098	4.51008	-10.0175	6.29664e-22	1.01281e-20	38.7794
TMSB15A	-1.50513	4.44047	-10.0168	6.33103e-22	1.01765e-20	38.774
FKBP14-AS1	1.24024	3.5223	10.0164	6.35487e-22	1.02078e-20	38.7703
H1-12P	2.76351	3.8174	10.013	6.54365e-22	1.04991e-20	38.7413
RCOR2	1.54796	4.91422	10.013	6.54515e-22	1.04991e-20	38.7411
APH1B	-0.576331	6.10267	-10.0077	6.84912e-22	1.09792e-20	38.6962
FCRL5	1.83198	4.47443	9.99865	7.40933e-22	1.1861e-20	38.6185
DCSTAMP	-1.73934	4.23354	-9.99669	7.53576e-22	1.20552e-20	38.6018
ZNF687-AS1	0.909238	4.84268	9.99492	7.65165e-22	1.22322e-20	38.5867
ZBTB16	-2.20808	4.0912	-9.99265	7.80362e-22	1.24667e-20	38.5672
PKDCC	-0.943732	6.00788	-9.98819	8.10979e-22	1.2947e-20	38.5292
MLC1	-1.58797	3.43976	-9.98046	8.6697e-22	1.38314e-20	38.4632
H4C14	1.53196	2.95377	9.97925	8.76029e-22	1.39665e-20	38.4529
MARCO	-1.2144	7.04066	-9.96982	9.50268e-22	1.51295e-20	38.3725
VWFP1	-1.77973	2.63379	-9.96802	9.65159e-22	1.53562e-20	38.3571
ARL6	-0.519336	5.76977	-9.96057	1.02913e-21	1.63628e-20	38.2937
CDKL1	-1.09969	4.01675	-9.95868	1.04605e-21	1.66206e-20	38.2776
H2BC15	1.20385	4.07963	9.95769	1.05504e-21	1.67521e-20	38.2691
OR7E38P	0.634125	6.33743	9.95349	1.09385e-21	1.73566e-20	38.2334
CCDC185	2.01536	2.20529	9.94632	1.16353e-21	1.84373e-20	38.1724
UBE2Q1-AS1	1.64531	4.01924	9.93879	1.24137e-21	1.96047e-20	38.1084
RASSF8	-0.861983	6.05348	-9.93809	1.24893e-21	1.97108e-20	38.1024
MYRF	-1.38431	5.76483	-9.93163	1.32027e-21	2.08226e-20	38.0475
CD33	-1.13512	4.9898	-9.93068	1.33112e-21	2.09797e-20	38.0394
TMEM178A	-1.37578	4.83216	-9.92216	1.43226e-21	2.25434e-20	37.967
CBARP	1.52121	3.69422	9.9208	1.44913e-21	2.27937e-20	37.9554
POP1	0.506269	5.68886	9.92002	1.45886e-21	2.2916e-20	37.9488
C1orf56	0.504322	6.35781	9.91864	1.47622e-21	2.31627e-20	37.9371
RHPN1-AS1	1.06013	5.09346	9.91862	1.47654e-21	2.31627e-20	37.9369
RD3	-1.08528	0.988012	-9.91522	1.52031e-21	2.38175e-20	37.908
FAM167A	-1.46599	5.55354	-9.90815	1.61543e-21	2.52739e-20	37.848
TNFRSF18	1.20197	6.10233	9.90665	1.6364e-21	2.5568e-20	37.8353
RGS22	-1.82789	3.23785	-9.90457	1.66588e-21	2.59767e-20	37.8176
TEX49	-1.75475	1.21888	-9.90434	1.66907e-21	2.60025e-20	37.8158
JSRP1	1.56395	5.1967	9.9043	1.66975e-21	2.60025e-20	37.8154
SLCO2A1	-0.737163	6.89931	-9.90014	1.73046e-21	2.68954e-20	37.7801
PF4	-2.17927	3.46331	-9.90013	1.73053e-21	2.68954e-20	37.78
EMILIN2	-0.60111	6.4477	-9.89583	1.79563e-21	2.78335e-20	37.7435
ADCY9	-0.649306	6.34271	-9.89386	1.82617e-21	2.82882e-20	37.7268
TMEM232	-1.76692	2.62069	-9.89154	1.86285e-21	2.88183e-20	37.7072
FAM167B	-0.660855	6.39602	-9.88787	1.92243e-21	2.97009e-20	37.6761
CYP2U1	-0.668456	5.61798	-9.88708	1.93553e-21	2.98836e-20	37.6694
CDK5R1	0.962103	5.18339	9.88589	1.95533e-21	3.01496e-20	37.6593
PTPRO	-1.22833	4.8787	-9.87844	2.08432e-21	3.21174e-20	37.5962
HK3	-1.0262	6.23423	-9.87786	2.09467e-21	3.22557e-20	37.5913
BORA	0.648421	5.5375	9.86784	2.2824e-21	3.50775e-20	37.5064
TIMP3	-1.24326	5.70941	-9.85253	2.60175e-21	3.99593e-20	37.377
VASH1	-0.56384	6.30901	-9.8507	2.64288e-21	4.05645e-20	37.3615
OSBPL6	-1.3712	4.29801	-9.84983	2.66256e-21	4.08399e-20	37.3542
TMEM139	-1.78323	5.27524	-9.83995	2.89708e-21	4.435e-20	37.2708
MS4A15	-2.56746	5.24409	-9.8398	2.90096e-21	4.43805e-20	37.2694
SEMA6A-AS2	-1.57415	1.10294	-9.83279	3.07972e-21	4.7054e-20	37.2103
NEDD4L	-0.515363	6.68499	-9.82644	3.25147e-21	4.96457e-20	37.1567
OTULINL	-0.697149	6.68828	-9.82632	3.25479e-21	4.96641e-20	37.1557
INCENP	0.529488	6.43689	9.82514	3.28767e-21	5.01332e-20	37.1458
MAP7D2	1.92171	4.83214	9.82496	3.29273e-21	5.01778e-20	37.1443
COL7A1	1.62032	4.9773	9.82272	3.35646e-21	5.11112e-20	37.1253
PSAPL1	-2.15538	1.93229	-9.82094	3.40776e-21	5.18297e-20	37.1103
SIRPA	-0.539455	6.95678	-9.81185	3.6825e-21	5.58636e-20	37.0337
CPP	2.13821	3.62009	9.80961	3.7534e-21	5.68688e-20	37.0149
EGLN3	1.15507	6.23784	9.8096	3.75362e-21	5.68688e-20	37.0148
COLEC12	-0.981619	6.41439	-9.80122	4.0315e-21	6.08824e-20	36.9442
TNNI2	-1.33979	5.2755	-9.79996	4.07536e-21	6.15051e-20	36.9335
COCH	1.87805	4.53303	9.79911	4.10486e-21	6.19105e-20	36.9264
LRRK2-DT	-2.02428	5.2432	-9.79667	4.19093e-21	6.31681e-20	36.9059
MAOB	-0.881453	6.48361	-9.78758	4.52839e-21	6.8036e-20	36.8294
RACGAP1	0.546584	6.63603	9.78335	4.69432e-21	7.04388e-20	36.7938
CDH23	-1.25962	3.65418	-9.77863	4.88676e-21	7.3186e-20	36.7541
MATN3	-1.05981	5.87123	-9.77249	5.14875e-21	7.70113e-20	36.7025
CST4	2.72824	2.7107	9.77065	5.22967e-21	7.81222e-20	36.6871
CNTNAP3P1	-0.916808	0.434688	-9.7632	5.57156e-21	8.31552e-20	36.6245
LRRC4B	-1.23804	4.28742	-9.76316	5.57368e-21	8.31552e-20	36.6241
HHIPL2	2.68646	3.91159	9.75713	5.86667e-21	8.74153e-20	36.5735
BDH1	0.760054	5.80959	9.75593	5.92665e-21	8.82529e-20	36.5635
METAP1D	0.61554	5.36267	9.75463	5.99218e-21	8.91721e-20	36.5526
ZMYND15	-0.792967	5.68821	-9.75333	6.05888e-21	9.01076e-20	36.5417
FILNC1	-1.37603	1.28838	-9.74929	6.27043e-21	9.31357e-20	36.5078
BHLHA15	1.45086	5.59031	9.74826	6.32534e-21	9.38918e-20	36.4991
CDKL5	-0.752305	5.39185	-9.74429	6.54195e-21	9.70457e-20	36.4659
BTK	-0.849915	6.05172	-9.74153	6.69732e-21	9.92878e-20	36.4427
LAMC3	-1.11767	5.66922	-9.73678	6.97282e-21	1.03307e-19	36.4029
TSPAN12	-0.543171	7.00481	-9.73426	7.12299e-21	1.05399e-19	36.3818
VGLL3	-1.06744	5.53493	-9.73378	7.1521e-21	1.05763e-19	36.3778
MROH9	-2.01179	1.90457	-9.72691	7.58107e-21	1.11965e-19	36.3202
CST5	-2.35733	3.50215	-9.72207	7.89853e-21	1.1658e-19	36.2797
CNTNAP3P2	-1.17696	1.14091	-9.7204	8.01094e-21	1.18165e-19	36.2657
MTURN	-0.672751	6.5375	-9.71431	8.43476e-21	1.24261e-19	36.2148
ST6GALNAC2	-1.19522	5.56983	-9.71405	8.45366e-21	1.24461e-19	36.2126
ACR	-1.36975	2.16513	-9.70593	9.05476e-21	1.3306e-19	36.1447
PGLYRP4	2.34574	3.54667	9.70178	9.37904e-21	1.37653e-19	36.1099
SILC1	-1.63801	1.23569	-9.69714	9.75437e-21	1.42894e-19	36.0712
MYLK	-0.689886	6.37494	-9.69008	1.0354e-20	1.51394e-19	36.0122
BIK	0.792756	6.48313	9.68788	1.05486e-20	1.54144e-19	35.9938
SLC29A4	1.38154	5.71819	9.68483	1.08234e-20	1.5806e-19	35.9684
LRCH2	-1.3066	4.77186	-9.68425	1.08772e-20	1.58747e-19	35.9635
AK4P1	1.7389	3.45843	9.68153	1.11297e-20	1.62332e-19	35.9409
MROH3P	2.09906	2.28685	9.68047	1.12298e-20	1.6369e-19	35.932
CA3	-1.7209	4.82468	-9.67987	1.12868e-20	1.64419e-19	35.927
RASGRP2	-1.0336	5.12845	-9.67938	1.13337e-20	1.65e-19	35.9229
ART1	-1.49727	1.28562	-9.67787	1.14794e-20	1.67017e-19	35.9103
AJM1	0.991555	5.02503	9.67444	1.18166e-20	1.71711e-19	35.8817
NETO1	2.13296	2.3398	9.66648	1.26381e-20	1.83534e-19	35.8153
MAGI2	-0.839187	4.77296	-9.6567	1.37239e-20	1.98688e-19	35.7339
JAK3	0.606979	6.24148	9.64971	1.45579e-20	2.10503e-19	35.6756
DLL3	2.64895	2.93294	9.63933	1.58878e-20	2.29591e-19	35.5892
STARD4	-0.563086	6.22593	-9.6354	1.64218e-20	2.37161e-19	35.5566
MIR4435-2HG	0.592025	5.87736	9.63202	1.68958e-20	2.43707e-19	35.5285
PODNL1	1.30766	5.58411	9.63107	1.70321e-20	2.45522e-19	35.5205
KPNA7	1.33751	5.33888	9.62851	1.74025e-20	2.50594e-19	35.4993
S100A12	-1.75436	4.51164	-9.62849	1.74053e-20	2.50594e-19	35.4991
CA1	-1.64523	1.35959	-9.62508	1.79124e-20	2.57579e-19	35.4708
ARRDC4	-0.618026	6.53926	-9.6216	1.84449e-20	2.64919e-19	35.4418
SUSD2	-1.14965	6.99798	-9.62159	1.84455e-20	2.64919e-19	35.4418
SRPK3	1.79479	4.45203	9.62106	1.85275e-20	2.65773e-19	35.4374
LTC4S	-1.16849	1.17333	-9.61693	1.91833e-20	2.74844e-19	35.403
PLA2G3	-2.35099	3.7229	-9.61285	1.98531e-20	2.83747e-19	35.3691
KLHL2P1	1.66185	3.6216	9.60896	2.05116e-20	2.92624e-19	35.3369
FRGCA	2.49077	3.4282	9.59473	2.31152e-20	3.29167e-19	35.2189
OTUB2	0.80331	4.90297	9.59444	2.31712e-20	3.29764e-19	35.2165
VSTM4	-0.867288	5.73593	-9.59361	2.33336e-20	3.31875e-19	35.2096
SNORD7	2.24042	4.54247	9.59303	2.34486e-20	3.33308e-19	35.2047
ELMO1	-0.689723	5.94498	-9.59146	2.37588e-20	3.37513e-19	35.1917
CCDC178	-1.36294	1.42835	-9.58247	2.56205e-20	3.63301e-19	35.1172
TMOD2	-0.796447	5.14417	-9.57941	2.6285e-20	3.72498e-19	35.0919
ZNF331	-0.636331	6.15295	-9.57671	2.68881e-20	3.80814e-19	35.0695
JPH2	-1.3275	3.99334	-9.57197	2.79759e-20	3.95743e-19	35.0304
GBA3	-1.8248	1.92658	-9.56396	2.99191e-20	4.22723e-19	34.964
CRTAC1	-1.73935	6.10563	-9.55518	3.22005e-20	4.54562e-19	34.8914
GGTLC2	-1.99757	2.49097	-9.55514	3.22114e-20	4.54562e-19	34.8911
REXO5	0.659378	5.20239	9.55186	3.31084e-20	4.66659e-19	34.864
CFAP20DC	1.31843	3.71788	9.55112	3.33121e-20	4.69248e-19	34.8579
NQO1	0.625431	7.5333	9.5467	3.45666e-20	4.86045e-19	34.8214
DLG5	0.562674	6.34176	9.54438	3.5246e-20	4.95302e-19	34.8022
FGD4	-0.570594	5.99413	-9.54084	3.63026e-20	5.09235e-19	34.773
INKA1	-0.856131	5.51986	-9.53819	3.71157e-20	5.2033e-19	34.7511
TCP11L2	-0.686275	5.50381	-9.53661	3.76102e-20	5.26633e-19	34.7381
CNN3-DT	-0.624581	6.38895	-9.52129	4.27449e-20	5.97106e-19	34.6117
SMCO3	-1.34144	3.67032	-9.5184	4.37868e-20	6.11269e-19	34.5879
EFNA2	2.46164	2.53182	9.515	4.50472e-20	6.27771e-19	34.5599
PRCD	-0.907341	3.03407	-9.51339	4.5659e-20	6.3592e-19	34.5465
LAGE3P1	1.61461	3.17677	9.50349	4.95891e-20	6.89838e-19	34.465
NEBL	-0.900705	6.33032	-9.50202	5.01971e-20	6.97883e-19	34.453
PLA2G2C	1.59719	2.16572	9.50192	5.02404e-20	6.98072e-19	34.4521
BNIP5	2.2632	2.62025	9.5014	5.04588e-20	7.0069e-19	34.4478
PRR5-ARHGAP8	1.19742	2.25795	9.49902	5.14706e-20	7.14318e-19	34.4282
CCR8	1.45533	4.14837	9.49648	5.25712e-20	7.29162e-19	34.4073
SPATS1	-1.67198	0.961428	-9.4955	5.3001e-20	7.34689e-19	34.3993
ZNF385B	-2.00396	5.10599	-9.49523	5.3119e-20	7.3589e-19	34.3971
C1orf147	1.30279	2.71664	9.48705	5.68645e-20	7.85922e-19	34.3298
PROK2	-1.69733	2.59779	-9.48538	5.76617e-20	7.96471e-19	34.316
LRRK2	-1.41862	6.20801	-9.48436	5.81529e-20	8.02784e-19	34.3077
RPL23AP32	-1.99168	2.50827	-9.48355	5.85484e-20	8.07769e-19	34.301
SMIM10L2B	-0.974294	4.5786	-9.47991	6.03497e-20	8.31643e-19	34.271
C10orf105	-0.932774	1.02936	-9.47933	6.06423e-20	8.35184e-19	34.2663
FOSB	-1.39915	6.45206	-9.47613	6.22759e-20	8.57179e-19	34.24
LNP1	-0.605839	5.37748	-9.47307	6.38845e-20	8.78805e-19	34.2148
ADARB2	-1.47672	2.0231	-9.47284	6.40045e-20	8.7994e-19	34.213
RHPN1	0.789357	6.57969	9.46899	6.60867e-20	9.08035e-19	34.1814
RBM12B-AS1	1.167	4.47863	9.46851	6.63528e-20	9.11157e-19	34.1774
FCGR3B	-1.69856	4.38866	-9.45943	7.15517e-20	9.814e-19	34.1029
ASGR1	-0.989886	4.90205	-9.4477	7.88731e-20	1.07993e-18	34.0067
PFKP-DT	1.69669	3.90985	9.44472	8.08498e-20	1.10635e-18	33.9823
FRMPD4	-0.908628	0.55722	-9.43915	8.46701e-20	1.15727e-18	33.9367
PAK6	0.861455	2.3825	9.43903	8.47566e-20	1.15778e-18	33.9357
LIPM	1.69805	4.30097	9.43376	8.85418e-20	1.20878e-18	33.8925
KCNMB2	-1.57499	2.21572	-9.43344	8.87823e-20	1.21066e-18	33.8898
LILRA6	-1.12717	4.9131	-9.43198	8.98613e-20	1.22466e-18	33.8779
SYPL2	-1.31332	3.29344	-9.42964	9.16198e-20	1.2479e-18	33.8588
SUGCT-AS1	-1.52413	3.33712	-9.42853	9.24664e-20	1.2587e-18	33.8497
ONECUT2	1.9968	2.28815	9.42191	9.76862e-20	1.32668e-18	33.7955
LILRA2	-1.34781	4.52677	-9.41672	1.01975e-19	1.38173e-18	33.7531
DIAPH2	-0.599506	6.02755	-9.40434	1.12977e-19	1.52728e-18	33.6519
TESMIN	1.59738	4.23428	9.40424	1.13071e-19	1.52767e-18	33.6511
DENND2C	-0.962278	4.18581	-9.40303	1.14209e-19	1.54215e-18	33.6412
RPS10P7	0.746922	5.28838	9.39579	1.21259e-19	1.63359e-18	33.582
GOLGA7B	1.26476	5.76748	9.39234	1.24763e-19	1.67886e-18	33.5539
RPL32P33	2.29382	2.49926	9.39218	1.24927e-19	1.6801e-18	33.5526
TCTE1	-2.11992	2.729	-9.39182	1.253e-19	1.68416e-18	33.5497
PDPN	-0.762433	6.63142	-9.38681	1.30601e-19	1.7544e-18	33.5088
KHDRBS2-OT1	-2.24131	2.37288	-9.38554	1.31977e-19	1.77187e-18	33.4984
DRP2	1.49496	2.17172	9.38429	1.3335e-19	1.78928e-18	33.4882
IGHV5-78	1.66424	5.32451	9.3838	1.33887e-19	1.79547e-18	33.4842
MAP6	-1.1659	5.03178	-9.37824	1.40186e-19	1.87886e-18	33.4388
PLAGL1	-0.902908	5.60582	-9.37556	1.43318e-19	1.91973e-18	33.417
KCNAB2	-0.59646	6.26662	-9.37281	1.46613e-19	1.96052e-18	33.3946
KMO	-1.00533	4.77938	-9.36632	1.54673e-19	2.06712e-18	33.3417
ST13P2	-1.06271	0.633053	-9.36322	1.58678e-19	2.11823e-18	33.3165
SPHKAP	-1.07506	0.522036	-9.36138	1.61105e-19	2.14941e-18	33.3015
ARNTL2	1.0363	5.97819	9.35895	1.64362e-19	2.19161e-18	33.2818
NXPH4	1.90429	4.39713	9.35488	1.69974e-19	2.26516e-18	33.2486
ATP5PBP5	-1.42709	4.1763	-9.35002	1.76921e-19	2.35507e-18	33.2091
LST1	-0.694086	6.6468	-9.3487	1.7886e-19	2.37953e-18	33.1983
CA5B	-0.573487	5.01786	-9.34821	1.79575e-19	2.38768e-18	33.1944
AP1S2	-0.529617	6.33597	-9.34665	1.81896e-19	2.41581e-18	33.1817
SRPX2	0.778741	6.6747	9.34366	1.86439e-19	2.47334e-18	33.1573
AKT3	-0.73543	5.90349	-9.34264	1.88006e-19	2.49273e-18	33.1491
EVI2B	-0.537815	6.98618	-9.3422	1.88698e-19	2.50048e-18	33.1454
FRMPD1	-1.27246	1.28184	-9.33749	1.96156e-19	2.59785e-18	33.1072
GFRA1	-1.87277	3.76335	-9.32577	2.16015e-19	2.85763e-18	33.012
DDO	-1.16667	5.15687	-9.3099	2.46116e-19	3.25034e-18	32.8832
STAC3	-0.657656	5.84043	-9.30734	2.5134e-19	3.31647e-18	32.8624
NPW	2.16235	4.09458	9.30537	2.55428e-19	3.36763e-18	32.8465
CWH43	-2.2584	2.02054	-9.30462	2.57009e-19	3.38658e-18	32.8404
SLC7A11	1.51232	5.49009	9.30071	2.65401e-19	3.49324e-18	32.8087
DISP1	-0.599795	6.0184	-9.30063	2.65565e-19	3.49343e-18	32.8081
ADH1B	-2.12278	5.86278	-9.29624	2.75315e-19	3.61763e-18	32.7725
FHDC1	-0.632982	6.24823	-9.29414	2.80101e-19	3.67847e-18	32.7555
ABCA10	-1.33891	2.90064	-9.29391	2.80624e-19	3.68326e-18	32.7537
REPS2	-0.804161	5.64276	-9.28953	2.90884e-19	3.8158e-18	32.7182
TNNT3	-1.8043	2.56311	-9.28866	2.92976e-19	3.84109e-18	32.7111
FAM86EP	0.5746	5.28208	9.28821	2.94057e-19	3.85309e-18	32.7075
CHRDL1	-1.51799	5.99376	-9.28814	2.9422e-19	3.85309e-18	32.7069
GPC5-AS1	-2.10065	1.31808	-9.28755	2.95659e-19	3.86978e-18	32.7021
FAM47E-STBD1	-0.850297	0.996433	-9.28377	3.04965e-19	3.98714e-18	32.6715
HLA-V	-1.87271	3.77049	-9.28342	3.05846e-19	3.99643e-18	32.6687
RNF207	0.959399	5.49585	9.28328	3.06182e-19	3.9986e-18	32.6676
SIGLEC5	-1.29334	3.25111	-9.28251	3.08132e-19	4.02183e-18	32.6613
OR10A3	-0.774886	0.299774	-9.27456	3.28879e-19	4.28784e-18	32.597
TNFSF13	-0.538303	6.8659	-9.27288	3.33426e-19	4.34471e-18	32.5835
CASP5	-1.42483	3.5933	-9.26847	3.45693e-19	4.49957e-18	32.5478
SEL1L2	-0.601961	0.351246	-9.26612	3.52391e-19	4.5842e-18	32.5289
H2BC7	2.41104	3.2261	9.26334	3.60509e-19	4.68722e-18	32.5064
PIK3R5	-0.804347	5.70559	-9.25854	3.74964e-19	4.86976e-18	32.4676
EPHB6	-1.22075	4.93249	-9.25696	3.79818e-19	4.93007e-18	32.4549
TRGJP1	-2.3096	1.058	-9.25499	3.85986e-19	5.0046e-18	32.439
PRRG3	-1.31826	2.83324	-9.25381	3.89754e-19	5.05066e-18	32.4294
FAM72C	1.56611	2.43825	9.25227	3.9467e-19	5.11155e-18	32.417
DEPDC4	0.781905	3.71157	9.24924	4.0458e-19	5.23701e-18	32.3925
H1-3	2.34641	3.10069	9.23013	4.72928e-19	6.10153e-18	32.2385
FPR1	-0.898305	6.3621	-9.2277	4.82403e-19	6.22035e-18	32.2189
CEACAM21	-1.07055	5.32679	-9.22435	4.95777e-19	6.38929e-18	32.1919
MAGI1	-0.658193	5.92094	-9.22356	4.99e-19	6.4273e-18	32.1855
STON1-GTF2A1L	-0.851259	0.938566	-9.22329	5.00104e-19	6.43798e-18	32.1833
CPEB1	-1.26752	2.49967	-9.21879	5.1877e-19	6.67461e-18	32.1472
HOATZ	-2.28826	3.25981	-9.21706	5.2617e-19	6.76611e-18	32.1332
THSD4	-0.88844	5.36141	-9.2167	5.27685e-19	6.78188e-18	32.1303
GBP4	-0.641365	6.79226	-9.21622	5.29773e-19	6.80499e-18	32.1264
CCDC173	-1.487	4.13335	-9.21356	5.41405e-19	6.9468e-18	32.105
MELTF-AS1	0.914908	5.31299	9.20964	5.58976e-19	7.16833e-18	32.0735
DAPK1	-0.522724	6.87724	-9.20073	6.0105e-19	7.70369e-18	32.0019
TMTC1	-1.26454	4.70038	-9.19933	6.0794e-19	7.78774e-18	31.9906
MAP3K14-AS1	0.690373	5.2035	9.19721	6.1853e-19	7.91475e-18	31.9736
DUOXA1	-1.47728	5.84606	-9.1954	6.27705e-19	8.02778e-18	31.959
IGIP	-0.507023	6.19152	-9.19458	6.3191e-19	8.07716e-18	31.9525
GUCA1A	1.71216	1.82851	9.19227	6.43933e-19	8.22636e-18	31.9339
LY86	-0.709937	6.65894	-9.18586	6.7841e-19	8.65738e-18	31.8824
H2BC9	2.30301	4.08225	9.18518	6.8217e-19	8.70064e-18	31.8769
MMP9	0.840494	7.12233	9.1837	6.90392e-19	8.80072e-18	31.8651
ACTR3B	0.515361	5.26923	9.18099	7.05803e-19	8.99228e-18	31.8433
TEF	-0.558645	6.58457	-9.18051	7.08547e-19	9.02234e-18	31.8395
MNDA	-0.716967	6.74578	-9.18041	7.09136e-19	9.02495e-18	31.8387
GNB3	1.25134	3.66046	9.17508	7.40505e-19	9.41906e-18	31.7959
GSAP	-0.541953	6.30078	-9.17426	7.455e-19	9.47746e-18	31.7893
MIR223HG	-1.3425	4.71559	-9.16953	7.74688e-19	9.8432e-18	31.7514
KRTAP4-1	2.99026	2.85065	9.16736	7.88465e-19	1.00128e-17	31.734
SEMA3B	-1.07098	6.31848	-9.15311	8.85158e-19	1.11923e-17	31.6199
EPB41L3	-0.817431	5.87189	-9.153	8.85986e-19	1.11967e-17	31.6189
NUP62CL	0.938941	5.41867	9.14995	9.08109e-19	1.14701e-17	31.5946
GJB6	2.4486	3.46781	9.14869	9.17449e-19	1.15819e-17	31.5845
WDR11-AS1	-1.23286	1.50332	-9.14658	9.33319e-19	1.17759e-17	31.5676
GAL	2.4067	3.5143	9.1447	9.47657e-19	1.19504e-17	31.5525
ARAP2	-0.718675	5.91649	-9.1442	9.5149e-19	1.19923e-17	31.5486
CD244	-1.08593	4.61394	-9.14175	9.70584e-19	1.22263e-17	31.5289
TENM4	1.15882	4.73004	9.1385	9.9648e-19	1.25324e-17	31.503
FBXL7	-0.741513	5.63038	-9.13835	9.97669e-19	1.25406e-17	31.5018
IRAK1BP1	-0.714458	4.84966	-9.1302	1.06577e-18	1.33894e-17	31.4366
DDIT4L	1.49431	5.38461	9.12827	1.08259e-18	1.35863e-17	31.4212
PRRT3-AS1	0.94661	5.50611	9.12797	1.08524e-18	1.36122e-17	31.4188
KIR2DL1	-1.68618	1.55761	-9.12505	1.11121e-18	1.39304e-17	31.3954
ARTN	1.41005	4.20637	9.12005	1.15709e-18	1.44979e-17	31.3555
IL34	-0.991971	5.52275	-9.11627	1.19296e-18	1.49394e-17	31.3254
PRKN	-1.16717	3.80804	-9.10756	1.28003e-18	1.60127e-17	31.2559
RPL7AP64	-1.37059	4.17263	-9.10502	1.30661e-18	1.63364e-17	31.2356
TRPC2	-1.3573	2.30986	-9.10222	1.3365e-18	1.67013e-17	31.2133
GNGT2	-0.854551	5.40185	-9.09793	1.38369e-18	1.72818e-17	31.179
ABCB4	1.28966	3.1865	9.09476	1.41954e-18	1.77201e-17	31.1538
VTN	-1.43021	4.00144	-9.09353	1.43374e-18	1.78879e-17	31.144
COMP	1.47998	6.26632	9.09305	1.43924e-18	1.79469e-17	31.1402
TNFAIP8L3	-0.812475	5.65648	-9.08826	1.49604e-18	1.86354e-17	31.102
AZIN2	0.781871	5.21741	9.08713	1.5097e-18	1.87956e-17	31.093
PTGDS	-0.712687	7.21372	-9.0842	1.54583e-18	1.92352e-17	31.0697
TRMT9B	-1.34971	3.16438	-9.08242	1.56817e-18	1.94925e-17	31.0556
CADM1	-0.812091	6.67766	-9.07725	1.63498e-18	2.03014e-17	31.0144
FCN1	-1.16591	5.67589	-9.07505	1.66421e-18	2.06425e-17	30.9969
ARHGEF37	-1.00966	5.43705	-9.07383	1.68072e-18	2.08364e-17	30.9872
FAM43A	-0.649005	6.0916	-9.07038	1.72806e-18	2.14119e-17	30.9598
ARL9	1.55173	4.23181	9.06706	1.7749e-18	2.19807e-17	30.9334
RN7SKP161	-1.62102	0.901829	-9.05028	2.03166e-18	2.51206e-17	30.8001
DNM1P46	-1.04631	1.567	-9.04478	2.12359e-18	2.62435e-17	30.7564
CEBPB-AS1	-0.854705	3.84596	-9.04299	2.15448e-18	2.66112e-17	30.7422
EPB41L4A-DT	-1.00798	4.46054	-9.03653	2.2693e-18	2.79853e-17	30.6909
ECM2	-0.813084	5.81878	-9.03545	2.28911e-18	2.82147e-17	30.6824
RNU5B-4P	-2.3117	3.25617	-9.03493	2.29866e-18	2.83175e-17	30.6783
H3C10	1.19628	5.61877	9.03397	2.3164e-18	2.85062e-17	30.6707
RTL3	-1.03625	1.17153	-9.03202	2.35292e-18	2.89404e-17	30.6553
ABCA3	-0.868509	7.22038	-9.02962	2.39883e-18	2.94896e-17	30.6362
CYP2F1	-2.25686	2.54882	-9.02661	2.45756e-18	3.01959e-17	30.6123
ARSF	-0.878842	0.853345	-9.02463	2.49691e-18	3.06633e-17	30.5967
PCAT7	1.64319	3.61068	9.02181	2.55412e-18	3.13495e-17	30.5743
NLRP3P1	1.83561	1.86392	9.0217	2.55643e-18	3.13614e-17	30.5734
NKAIN1	1.85748	2.32656	9.0139	2.72141e-18	3.33504e-17	30.5117
OR2B6	1.84548	2.36381	9.01219	2.75899e-18	3.37933e-17	30.4982
KIAA1328	-0.620685	4.73132	-9.00764	2.8615e-18	3.49941e-17	30.4622
CR2	1.86074	4.83782	9.00714	2.87313e-18	3.5118e-17	30.4582
LRRC71	-2.09971	3.05452	-9.00601	2.8992e-18	3.54182e-17	30.4493
MYO1F	-0.586866	6.31032	-9.00522	2.91761e-18	3.56246e-17	30.443
EFNB2	-0.523809	6.92627	-9.00496	2.92378e-18	3.56813e-17	30.441
COL4A6	-1.69918	2.68412	-9.00296	2.97103e-18	3.62391e-17	30.4251
DUSP9	2.27531	3.23773	9.00131	3.0105e-18	3.66825e-17	30.4121
SLC12A8	0.578287	6.26521	8.99974	3.04859e-18	3.71081e-17	30.3997
IGHGP	0.828011	7.36238	8.99693	3.11804e-18	3.7914e-17	30.3775
KDM4A-AS1	0.90781	4.30929	8.99312	3.21473e-18	3.90292e-17	30.3474
MMP17	1.42026	5.08751	8.99268	3.2261e-18	3.91469e-17	30.3439
CBFA2T3	-1.01697	5.02012	-8.99237	3.23411e-18	3.92238e-17	30.3415
CPAMD8	-1.45157	5.56429	-8.98883	3.32704e-18	4.03093e-17	30.3135
FOXF2	-0.86113	6.0126	-8.98711	3.37325e-18	4.0848e-17	30.2999
MPHOSPH9	0.587911	5.45612	8.98649	3.39005e-18	4.10303e-17	30.295
MYO9A	-0.50534	5.78199	-8.9857	3.41142e-18	4.12677e-17	30.2888
PTPRG-AS1	1.13801	3.60895	8.97749	3.64321e-18	4.40262e-17	30.224
FGL1	2.64937	4.42023	8.97669	3.66649e-18	4.42847e-17	30.2177
ATP8B5P	-1.40403	2.6273	-8.9752	3.71058e-18	4.47942e-17	30.2059
FAM83C-AS1	1.84245	2.61315	8.96951	3.88322e-18	4.6806e-17	30.161
PMS2P3	0.61041	5.48189	8.96024	4.18162e-18	5.02994e-17	30.088
MEF2C-AS2	-1.01714	0.42561	-8.95465	4.37246e-18	5.25142e-17	30.044
MCTS2P	0.819756	5.50932	8.94927	4.56461e-18	5.4766e-17	30.0016
EFNB1	-0.519628	6.80725	-8.94864	4.5874e-18	5.50113e-17	29.9967
IL36RN	2.53532	2.76322	8.9456	4.70007e-18	5.63336e-17	29.9727
RILP	-0.509891	6.64623	-8.94288	4.80326e-18	5.74823e-17	29.9513
H4C12	1.7179	4.08308	8.94025	4.90505e-18	5.86108e-17	29.9306
FAM86HP	0.801863	5.21432	8.93969	4.92708e-18	5.88442e-17	29.9262
GATA5	-1.51958	3.60219	-8.939	4.9542e-18	5.91379e-17	29.9208
MAPK6P5	-1.13456	0.896769	-8.9388	4.96214e-18	5.92026e-17	29.9192
MEX3B	0.746452	5.05952	8.93781	5.0013e-18	5.96395e-17	29.9115
SERPINA9	-1.6256	1.58894	-8.93419	5.14781e-18	6.13554e-17	29.883
TTLL10	-1.73776	3.1348	-8.92826	5.39681e-18	6.42905e-17	29.8364
MC1R	0.855593	4.93218	8.91959	5.78253e-18	6.87459e-17	29.7683
NHLRC4	-1.16509	4.65059	-8.9188	5.81898e-18	6.90926e-17	29.7621
CNTN4	-1.29061	3.75049	-8.91741	5.88399e-18	6.98106e-17	29.7512
MIR34B	-2.35839	1.21498	-8.91536	5.9809e-18	7.08888e-17	29.735
HCAR2	-1.26438	5.68799	-8.9095	6.26634e-18	7.42345e-17	29.6891
SIRPAP1	-1.24171	2.08912	-8.90839	6.3217e-18	7.48525e-17	29.6804
PARD3B	-0.785645	5.52771	-8.90759	6.36185e-18	7.52899e-17	29.6741
C1orf21	-0.72656	6.19249	-8.90578	6.45422e-18	7.63446e-17	29.6599
CAMK2N2	1.72976	3.24454	8.90517	6.48555e-18	7.66766e-17	29.6552
NAALAD2	-0.968902	3.18298	-8.90054	6.72865e-18	7.94706e-17	29.6189
NFATC1	-0.655738	5.72383	-8.89995	6.76026e-18	7.98037e-17	29.6142
CYP27C1	1.85881	3.82315	8.89701	6.92036e-18	8.16115e-17	29.5912
FUT3	0.880358	6.56603	8.89672	6.93605e-18	8.17555e-17	29.5889
GNGT1	2.44812	2.42469	8.89426	7.0732e-18	8.32885e-17	29.5696
BNIP3P5	-1.35992	3.75272	-8.89159	7.22477e-18	8.49453e-17	29.5487
TPK1	-0.858792	4.64251	-8.88635	7.5317e-18	8.85098e-17	29.5077
TRGJP2	-2.90197	3.50734	-8.87892	7.98935e-18	9.37939e-17	29.4495
MROCKI	-1.22811	3.44084	-8.87863	8.00748e-18	9.39598e-17	29.4473
TLL2	1.34168	2.22938	8.86567	8.87389e-18	1.04022e-16	29.346
H2BC18	1.42956	4.13016	8.8627	9.08529e-18	1.06447e-16	29.3227
PPFIA4	1.48439	3.82121	8.85146	9.9315e-18	1.16304e-16	29.2349
CD300E	-1.18614	4.91112	-8.85061	9.9986e-18	1.17031e-16	29.2283
DOK6	-1.27629	3.94645	-8.84976	1.00655e-17	1.17755e-16	29.2217
ACY1	0.588006	5.44821	8.84809	1.01999e-17	1.19209e-16	29.2086
ARHGEF19	0.544464	6.76946	8.84699	1.0289e-17	1.2019e-16	29.2
IGKV1-33	2.28481	4.51033	8.84537	1.04212e-17	1.21649e-16	29.1875
GREB1L	1.77885	3.2356	8.83123	1.16545e-17	1.35939e-16	29.0772
RNU6-762P	2.02297	4.48535	8.82907	1.18554e-17	1.38212e-16	29.0603
PHF24	-0.950884	1.92624	-8.82692	1.20583e-17	1.40369e-16	29.0436
RNF186	2.36145	2.8951	8.82091	1.26446e-17	1.47121e-16	28.9968
ADGB	-1.80598	1.71334	-8.81524	1.3223e-17	1.53774e-16	28.9527
DOCK8	-0.642538	6.20124	-8.81507	1.32405e-17	1.53902e-16	28.9514
OMG	-1.59185	4.26751	-8.81463	1.32873e-17	1.54369e-16	28.9479
ALDH1A1	-0.640269	7.30334	-8.81415	1.33369e-17	1.54869e-16	28.9442
ETV1	-0.82484	6.20702	-8.80622	1.41986e-17	1.64631e-16	28.8825
CYP4B1	-1.51532	6.69718	-8.80276	1.45905e-17	1.69008e-16	28.8556
NFAM1	-0.823932	5.95272	-8.80031	1.48757e-17	1.72141e-16	28.8366
OLFML2A	-0.707264	6.16849	-8.79989	1.49249e-17	1.72626e-16	28.8333
PRSS53	1.15915	3.60011	8.7953	1.54746e-17	1.78807e-16	28.7976
FAM180A	-1.32011	3.96618	-8.78716	1.64989e-17	1.90456e-16	28.7345
AKAP12	-0.892978	6.20338	-8.78673	1.65551e-17	1.9101e-16	28.7311
M1AP	-1.26359	3.42082	-8.78231	1.71411e-17	1.97577e-16	28.6968
CHRNA6	1.2196	2.11995	8.77336	1.83917e-17	2.11785e-16	28.6274
BCL2L2-PABPN1	1.0142	3.3072	8.77075	1.87728e-17	2.15961e-16	28.6072
COL6A4P2	1.38929	2.61616	8.77054	1.88038e-17	2.16212e-16	28.6055
SH3RF3-AS1	-1.03766	3.96498	-8.76712	1.93155e-17	2.21878e-16	28.5791
FAM24B	0.7705	5.30328	8.76079	2.03013e-17	2.32974e-16	28.53
PLEKHH2	-0.924483	5.66494	-8.76025	2.03869e-17	2.33841e-16	28.5258
GAPDHP65	1.23557	4.27894	8.75566	2.11348e-17	2.42301e-16	28.4903
USP30-AS1	-0.976656	5.48132	-8.75535	2.11871e-17	2.42783e-16	28.4879
LINGO1	1.39529	4.37184	8.75485	2.12706e-17	2.43621e-16	28.484
CA3-AS1	-1.37366	3.25579	-8.7502	2.20611e-17	2.52428e-16	28.448
GREB1	1.43588	4.05292	8.74818	2.24133e-17	2.56333e-16	28.4324
XAGE2	-2.6235	3.8623	-8.74779	2.24824e-17	2.56998e-16	28.4294
PPARG	-1.02567	6.14505	-8.74421	2.31225e-17	2.63929e-16	28.4017
LYRM4-AS1	0.720072	4.78772	8.73818	2.42423e-17	2.76308e-16	28.3551
GPRIN2	-1.16148	6.09974	-8.73788	2.42992e-17	2.76822e-16	28.3528
TRGC1	-1.33509	3.2541	-8.73681	2.45034e-17	2.79013e-16	28.3445
MRGPRF-AS1	-0.971046	1.05634	-8.73193	2.5459e-17	2.89613e-16	28.3068
C2orf73	-1.70451	2.27631	-8.71787	2.84229e-17	3.2286e-16	28.1983
RBMS2P1	-0.885386	4.01409	-8.71714	2.85846e-17	3.24539e-16	28.1927
BOLA2P3	1.99615	2.89411	8.71662	2.87011e-17	3.25548e-16	28.1887
PMEL	0.751929	4.94764	8.71439	2.92069e-17	3.31124e-16	28.1714
CNN1	-0.818628	6.2444	-8.71119	2.99471e-17	3.39352e-16	28.1468
CENPN	0.584152	5.96124	8.70979	3.02777e-17	3.42933e-16	28.136
SNORD72	2.34326	3.94999	8.70772	3.07724e-17	3.48367e-16	28.12
CD19	1.4665	4.85662	8.69176	3.48571e-17	3.9404e-16	27.9971
PSRC1	0.635496	5.85056	8.6873	3.60923e-17	4.07218e-16	27.9628
GLIPR1L2	-1.18242	3.05795	-8.68705	3.61636e-17	4.07827e-16	27.9609
PDE4DIPP7	-1.14694	1.26894	-8.68407	3.70161e-17	4.17241e-16	27.9379
FCRL4	1.55812	2.04697	8.68144	3.77813e-17	4.25457e-16	27.9177
CDKN1C	-0.57094	6.55473	-8.67898	3.85146e-17	4.33091e-16	27.8988
GCC2-AS1	0.88341	3.72897	8.67881	3.85666e-17	4.33468e-16	27.8974
AMIGO1	-0.72489	5.79321	-8.67823	3.87402e-17	4.35211e-16	27.893
NPR2	-0.523995	5.8727	-8.67616	3.93706e-17	4.4187e-16	27.8771
TEKT5	1.45013	3.23195	8.6718	4.0732e-17	4.56494e-16	27.8436
PLCXD3	-1.78128	3.36293	-8.67048	4.11524e-17	4.60986e-16	27.8335
RNU5B-3P	-2.12805	1.25187	-8.66731	4.21825e-17	4.72299e-16	27.8091
SIRPB2	-0.953202	5.19775	-8.66706	4.22641e-17	4.72987e-16	27.8072
LHX6	-1.02736	4.34577	-8.66593	4.26391e-17	4.76742e-16	27.7985
GCNT4	-1.28531	4.3341	-8.66466	4.30639e-17	4.81249e-16	27.7887
GLP2R	-1.51194	1.50438	-8.66332	4.3515e-17	4.85865e-16	27.7785
CNR1	-1.56478	4.46925	-8.66331	4.35183e-17	4.85865e-16	27.7784
SNORD46	1.68086	5.04086	8.65784	4.54134e-17	5.06781e-16	27.7364
PDZRN3	-0.836602	5.51394	-8.65336	4.70251e-17	5.24517e-16	27.702
SUGCT	1.08588	5.04434	8.65046	4.80966e-17	5.35706e-16	27.6798
SNRPEP4	1.02147	4.79805	8.64555	4.99682e-17	5.56288e-16	27.6422
PGAP4	-1.36557	4.98149	-8.64485	5.0244e-17	5.59093e-16	27.6368
C16orf86	-0.846304	4.91673	-8.64427	5.04708e-17	5.6135e-16	27.6323
SHOX2	1.73545	3.0053	8.64299	5.0974e-17	5.6641e-16	27.6225
RPGRIP1L	0.544315	4.92181	8.6424	5.12088e-17	5.68749e-16	27.618
COX6B2	1.5682	2.38357	8.63869	5.27079e-17	5.85123e-16	27.5896
IL18R1	-0.933555	5.17792	-8.63834	5.28515e-17	5.86439e-16	27.5869
F2RL3	-0.90485	5.45613	-8.63725	5.33025e-17	5.91164e-16	27.5785
ABCC9	-0.915196	5.23735	-8.63498	5.42493e-17	6.01315e-16	27.5612
SIGLEC6	-1.53279	3.71214	-8.63493	5.42691e-17	6.01315e-16	27.5608
DEFA4	-1.45369	0.865827	-8.62841	5.70881e-17	6.31656e-16	27.5109
ZHX1-C8orf76	0.704002	4.47454	8.6272	5.76276e-17	6.37026e-16	27.5016
PARVB	-0.51086	6.19677	-8.62684	5.7788e-17	6.38455e-16	27.4989
EBF1	-0.826437	4.82195	-8.62679	5.78114e-17	6.38455e-16	27.4985
TUBB8	1.29378	2.31109	8.62513	5.85613e-17	6.46433e-16	27.4858
SAMD5	-1.25103	4.88239	-8.62503	5.86086e-17	6.46651e-16	27.485
AOC1	1.91387	5.44367	8.62173	6.01283e-17	6.63107e-16	27.4598
IL20RA	-1.36592	5.3383	-8.61495	6.33765e-17	6.98272e-16	27.4079
UBE2FP1	-0.740095	4.96527	-8.61237	6.46563e-17	7.12039e-16	27.3882
TMEM249	1.38158	1.83592	8.60747	6.71616e-17	7.39281e-16	27.3508
P2RX1	-1.01716	4.91373	-8.60448	6.87353e-17	7.55895e-16	27.3279
GAPDHP62	1.31733	2.28984	8.60388	6.90556e-17	7.58706e-16	27.3234
ZGRF1	0.785413	4.32299	8.60225	6.9935e-17	7.68008e-16	27.3109
CXCL12	-0.741975	6.49213	-8.5991	7.16606e-17	7.86223e-16	27.2869
MIR3193	-2.15612	1.05633	-8.59834	7.20868e-17	7.9053e-16	27.281
SEPTIN14P12	1.65448	1.57981	8.59735	7.26378e-17	7.962e-16	27.2735
VAC14-AS1	1.31843	2.04431	8.59572	7.35614e-17	8.05784e-16	27.2611
TFPI2-DT	2.15484	2.47859	8.58379	8.06788e-17	8.8269e-16	27.1701
SRRM5	0.947949	3.86836	8.5813	8.22443e-17	8.9898e-16	27.1511
GBP7	-1.16265	1.39017	-8.58095	8.2473e-17	9.0106e-16	27.1484
GPR65	-0.853531	5.39787	-8.57994	8.31191e-17	9.07274e-16	27.1407
VWA3A	-2.01423	3.23372	-8.57844	8.40878e-17	9.16995e-16	27.1293
TIGD3	1.02332	4.13313	8.57654	8.53299e-17	9.30108e-16	27.1148
CD37	-0.566834	6.73914	-8.57527	8.6175e-17	9.38884e-16	27.1051
CDX1	1.25632	2.94061	8.57506	8.63105e-17	9.39923e-16	27.1036
COL17A1	1.83576	5.47252	8.57248	8.80534e-17	9.58459e-16	27.0839
C19orf38	-0.764224	5.57413	-8.57104	8.90392e-17	9.6874e-16	27.0729
SULT1B1	-1.37699	3.1976	-8.56716	9.17444e-17	9.9771e-16	27.0434
SLC2A3	-0.585338	6.80274	-8.56625	9.23919e-17	1.00382e-15	27.0365
URAHP	0.967546	4.32801	8.56315	9.463e-17	1.02719e-15	27.0129
NAALADL1	-0.756118	4.87458	-8.55839	9.81702e-17	1.06267e-15	26.9767
CRHBP	-1.12085	2.21501	-8.55626	9.97984e-17	1.07979e-15	26.9605
MIR27A	-2.6226	3.45436	-8.55478	1.00947e-16	1.09172e-15	26.9492
ELL3	0.905169	3.98712	8.55347	1.01971e-16	1.10229e-15	26.9393
TNFRSF13C	1.34669	4.79498	8.55192	1.03202e-16	1.11405e-15	26.9275
IL36G	2.07701	2.67655	8.55068	1.04195e-16	1.12425e-15	26.918
RNF139-AS1	0.988864	3.65895	8.55005	1.047e-16	1.12918e-15	26.9133
SRRM4	-0.99834	0.631159	-8.54957	1.05084e-16	1.13281e-15	26.9097
UCN2	1.83217	2.41805	8.54712	1.07093e-16	1.15393e-15	26.891
BOLA2-SMG1P6	0.670646	5.15436	8.54681	1.07346e-16	1.15612e-15	26.8887
SELENBP1	-0.523819	7.54666	-8.5448	1.09025e-16	1.17313e-15	26.8734
RAB3B	2.00726	3.01562	8.54432	1.09426e-16	1.17691e-15	26.8698
NDN	-0.537433	6.75663	-8.53912	1.13903e-16	1.22337e-15	26.8303
LHB	1.54894	3.46494	8.53662	1.16115e-16	1.24657e-15	26.8113
TBC1D31	0.638452	5.05937	8.5363	1.16405e-16	1.2491e-15	26.8089
SLA	-0.63555	6.33642	-8.53622	1.16474e-16	1.24928e-15	26.8083
CABCOCO1	-1.71885	4.57811	-8.53169	1.20611e-16	1.29129e-15	26.7739
SLC23A3	1.21468	3.64435	8.53029	1.21921e-16	1.30472e-15	26.7633
MRPL45P2	0.599604	5.05852	8.52988	1.22308e-16	1.30826e-15	26.7601
H2BC6	1.80695	3.46995	8.52981	1.22373e-16	1.30836e-15	26.7596
UST	-0.94359	5.63623	-8.52644	1.25589e-16	1.34213e-15	26.7341
PGF	0.828177	5.42467	8.52596	1.26048e-16	1.34643e-15	26.7305
CHI3L2	-1.13882	6.08786	-8.52181	1.3014e-16	1.38697e-15	26.699
CLDN14	1.30463	2.6571	8.52039	1.31576e-16	1.40164e-15	26.6882
MAS1LP1	-0.949011	0.598465	-8.51796	1.34056e-16	1.42677e-15	26.6698
RHCE	1.21055	4.10249	8.51432	1.37858e-16	1.46657e-15	26.6422
FOXH1	1.47851	1.91648	8.51338	1.38859e-16	1.47655e-15	26.6351
NPSR1	1.62836	1.57556	8.51188	1.40471e-16	1.49301e-15	26.6237
MYL1	-0.967095	0.342158	-8.50426	1.4894e-16	1.58016e-15	26.5661
KLF15	-1.20579	5.63343	-8.50148	1.52155e-16	1.61136e-15	26.545
PLBD1	-0.532331	7.04543	-8.49724	1.57185e-16	1.66388e-15	26.513
BNIP3P10	1.64131	2.57994	8.49285	1.62575e-16	1.72016e-15	26.4798
SFTPC	-2.13713	6.97476	-8.48997	1.66206e-16	1.75778e-15	26.458
ZNF367	0.69225	5.46494	8.48953	1.66769e-16	1.76295e-15	26.4547
CYP4Z2P	-2.13248	3.02423	-8.48904	1.67398e-16	1.76879e-15	26.451
JAZF1-AS1	-0.705052	0.848583	-8.48872	1.67816e-16	1.77242e-15	26.4485
CYBB	-0.530937	7.26902	-8.48711	1.69893e-16	1.79355e-15	26.4364
UPB1	-1.17622	1.94051	-8.48616	1.71131e-16	1.8058e-15	26.4292
LRRC8C-DT	-0.871708	3.72815	-8.4857	1.71737e-16	1.81138e-15	26.4258
KCNJ15	-1.24468	6.02051	-8.47778	1.82491e-16	1.92308e-15	26.3659
LAMA4	-0.508637	6.52827	-8.4751	1.86278e-16	1.96211e-15	26.3457
FBXW11P1	1.23522	2.49473	8.47501	1.86413e-16	1.96232e-15	26.345
PRKCZ	-0.527291	6.50202	-8.47268	1.89766e-16	1.99527e-15	26.3274
COL6A4P1	1.29686	1.49155	8.47069	1.92675e-16	2.02494e-15	26.3124
MPDZ	-0.653183	5.71641	-8.46809	1.96551e-16	2.06383e-15	26.2928
SETBP1-DT	-1.04077	4.13255	-8.46664	1.98753e-16	2.08602e-15	26.2819
EML4-AS1	-1.37906	3.81968	-8.46628	1.99296e-16	2.08985e-15	26.2792
RCSD1	-0.607819	6.16835	-8.46528	2.00835e-16	2.10411e-15	26.2716
H2AC9P	2.65699	2.57297	8.45938	2.10107e-16	2.19634e-15	26.2271
PRELP	-0.705854	6.93154	-8.45714	2.13729e-16	2.23122e-15	26.2103
FGF14	-1.2412	3.30398	-8.45441	2.18238e-16	2.27628e-15	26.1897
FAM183DP	-1.56469	1.26556	-8.45027	2.25258e-16	2.34532e-15	26.1585
ZFAND2A-DT	0.606063	5.76441	8.44651	2.3184e-16	2.41279e-15	26.1302
CAPN11	-0.989485	2.34256	-8.44208	2.39818e-16	2.4936e-15	26.0969
HMGA2-AS1	1.41464	1.94987	8.4384	2.46641e-16	2.56341e-15	26.0692
PCSK5	-0.917649	4.97269	-8.43704	2.49215e-16	2.58787e-15	26.059
GEMIN8P4	0.829475	5.11062	8.43473	2.53651e-16	2.63277e-15	26.0416
MIR25	1.57222	5.85325	8.43413	2.54824e-16	2.64377e-15	26.0371
CASP1	-0.506701	6.6612	-8.43185	2.59305e-16	2.68907e-15	26.0199
IGKJ5	2.19592	6.11202	8.42839	2.66243e-16	2.7598e-15	25.9939
GRHL3-AS1	1.53842	2.04328	8.42575	2.71642e-16	2.81221e-15	25.9741
NRGN	-0.806581	6.96665	-8.42286	2.7771e-16	2.87232e-15	25.9524
H3C4	1.79977	4.69723	8.42259	2.78281e-16	2.87696e-15	25.9503
PTGES2-AS1	1.30352	2.01146	8.4221	2.79321e-16	2.88644e-15	25.9467
PTPRD	-1.13439	4.44524	-8.41994	2.8395e-16	2.9317e-15	25.9305
SFTA1P	-1.17351	6.82293	-8.4198	2.84263e-16	2.93363e-15	25.9294
CRH	-1.29977	0.742387	-8.41934	2.85265e-16	2.94268e-15	25.9259
GPRASP1	-0.797496	5.00782	-8.4183	2.87519e-16	2.96463e-15	25.9182
CERCAM	0.538694	6.73494	8.41242	3.00698e-16	3.09916e-15	25.874
CLEC6A	-1.64952	2.89382	-8.40748	3.12231e-16	3.2152e-15	25.837
PLAC8	-1.05149	6.02409	-8.40699	3.13413e-16	3.22595e-15	25.8333
ADIRF-AS1	-1.10292	4.80016	-8.40622	3.15243e-16	3.24194e-15	25.8275
SAPCD1	1.4589	3.58016	8.40319	3.22606e-16	3.31476e-15	25.8048
PCP4	2.20291	5.07788	8.4018	3.26035e-16	3.34852e-15	25.7944
OACYLP	1.13891	1.72409	8.40053	3.29188e-16	3.37943e-15	25.7849
CNGA4	-1.75965	3.16888	-8.40037	3.29593e-16	3.38211e-15	25.7837
MSX1	-0.956033	4.50677	-8.39815	3.35212e-16	3.43677e-15	25.767
HPGDS	-1.22938	5.44961	-8.3951	3.43091e-16	3.51601e-15	25.7442
DTX2P1	0.819755	5.13683	8.39458	3.44449e-16	3.52684e-15	25.7403
KCNMB2-AS1	2.58711	3.31273	8.39437	3.44992e-16	3.53086e-15	25.7387
MS4A3	-0.982224	0.751671	-8.39317	3.4817e-16	3.56183e-15	25.7297
SERP2	-0.948381	4.73722	-8.39259	3.49692e-16	3.57585e-15	25.7254
SMPDL3B	0.527354	7.16916	8.38621	3.67066e-16	3.75024e-15	25.6776
KRT81	1.83237	4.2913	8.38496	3.70586e-16	3.78291e-15	25.6682
ITGB1-DT	1.67509	2.93977	8.38233	3.78068e-16	3.8576e-15	25.6486
ANKRD20A17P	-1.11115	0.785417	-8.37773	3.91499e-16	3.99118e-15	25.6142
TLE4	-0.639073	5.82684	-8.36977	4.1591e-16	4.23619e-15	25.5546
RNU6ATAC12P	-1.40768	0.422278	-8.36971	4.16073e-16	4.23619e-15	25.5542
CX3CR1	-1.34606	4.98031	-8.36871	4.19252e-16	4.2667e-15	25.5467
AQP9	-1.01801	6.0434	-8.36253	4.39386e-16	4.46773e-15	25.5005
NKAIN4	1.66044	3.11356	8.35236	4.74583e-16	4.81726e-15	25.4247
CC2D2A	-0.518948	5.84808	-8.35151	4.77657e-16	4.84637e-15	25.4183
TMEM35A	-1.42185	4.10597	-8.35066	4.80745e-16	4.87559e-15	25.412
SMCO2	1.42511	2.59223	8.34978	4.83944e-16	4.90592e-15	25.4054
SYT11	-0.525007	6.18539	-8.34277	5.10339e-16	5.16903e-15	25.3531
LGALSL-DT	-1.30075	2.97092	-8.3405	5.19196e-16	5.25193e-15	25.3362
RALGPS2-AS1	1.04199	2.86038	8.33885	5.25704e-16	5.31548e-15	25.3239
RTEL1	0.794357	3.44809	8.33859	5.26767e-16	5.32393e-15	25.322
EFR3B	-1.28082	4.63996	-8.33677	5.34045e-16	5.39516e-15	25.3084
SFTPD	-0.940802	7.59962	-8.33254	5.51413e-16	5.56344e-15	25.2769
HCAR3	-1.48345	3.67941	-8.33016	5.61434e-16	5.65968e-15	25.2592
COBLL1	-0.560356	5.98703	-8.32951	5.64217e-16	5.68286e-15	25.2543
MTX1P1	0.549245	6.05699	8.3286	5.68092e-16	5.71943e-15	25.2476
CHAC2	0.523912	5.99228	8.32726	5.7388e-16	5.77522e-15	25.2376
ACOXL-AS1	-1.2798	2.78401	-8.32612	5.78829e-16	5.82253e-15	25.2292
GAS7	-0.685493	6.13174	-8.32482	5.84571e-16	5.87777e-15	25.2194
C1orf141	-1.66658	1.22691	-8.32436	5.86613e-16	5.89578e-15	25.216
NCF1	-0.944332	5.3243	-8.32296	5.92819e-16	5.9556e-15	25.2056
C1orf159	0.546854	5.73309	8.31899	6.10883e-16	6.13183e-15	25.1761
PIK3R2	0.678049	3.36019	8.31729	6.18786e-16	6.2085e-15	25.1634
KIFC2	0.806575	6.0815	8.31293	6.3948e-16	6.41064e-15	25.131
NRXN1	-0.996445	0.714536	-8.31189	6.4452e-16	6.45841e-15	25.1233
CLIC3	-0.978235	6.85246	-8.31181	6.44936e-16	6.45982e-15	25.1227
COX6B1P5	1.75103	2.93966	8.30216	6.93635e-16	6.93575e-15	25.051
IGHV1OR21-1	1.99571	4.45926	8.30044	7.02717e-16	7.0176e-15	25.0382
BCYRN1	0.970804	3.23788	8.29921	7.0926e-16	7.07993e-15	25.0291
MYH1	-1.10663	1.00753	-8.29457	7.34491e-16	7.32867e-15	24.9947
IGHV3OR16-11	2.09426	3.30835	8.29383	7.38605e-16	7.36659e-15	24.9892
TLCD3B	1.16506	1.57302	8.29348	7.40535e-16	7.3827e-15	24.9866
SMIM10	-0.619688	5.97956	-8.29308	7.42788e-16	7.39979e-15	24.9836
SPDEF	1.06764	6.77968	8.28499	7.89452e-16	7.86036e-15	24.9236
C11orf97	-2.49305	2.94009	-8.28209	8.06893e-16	8.0238e-15	24.9021
GPR84	1.12875	5.05114	8.28164	8.09602e-16	8.04733e-15	24.8988
MRGPRF	-0.843004	5.69177	-8.2791	8.25281e-16	8.19623e-15	24.8799
GAB3	-0.724607	5.43077	-8.27497	8.51321e-16	8.4477e-15	24.8493
LMNTD1	-1.61434	1.43979	-8.27377	8.59033e-16	8.51873e-15	24.8405
PTPRG	-0.625701	6.11196	-8.27374	8.59205e-16	8.51873e-15	24.8403
C6	-2.02203	3.6135	-8.26806	8.96728e-16	8.88324e-15	24.7982
ERICH3	-2.1947	2.83252	-8.26772	8.99038e-16	8.90237e-15	24.7957
HEY2	-0.876837	4.75362	-8.26406	9.24084e-16	9.14266e-15	24.7686
CABLES1	-0.625757	6.40756	-8.26311	9.30714e-16	9.20438e-15	24.7616
NFE2L1-DT	1.06193	3.00172	8.2623	9.36374e-16	9.25646e-15	24.7556
SNHG12	0.551004	6.34037	8.26155	9.41686e-16	9.30504e-15	24.75
ADAM33	-1.28713	3.84441	-8.25576	9.83529e-16	9.71034e-15	24.7072
SLC25A5P1	1.05676	3.8336	8.25421	9.9505e-16	9.81995e-15	24.6958
C3orf70	-1.04575	4.0401	-8.24699	1.05047e-15	1.03581e-14	24.6424
DPH6-DT	-1.14854	2.39372	-8.24514	1.06515e-15	1.04941e-14	24.6288
RUNX3-AS1	1.46517	2.54896	8.24367	1.07697e-15	1.06016e-14	24.6179
TMEM236	-1.29479	3.58428	-8.24181	1.0921e-15	1.07461e-14	24.6042
RNU1-38P	-2.41359	2.23648	-8.24065	1.10168e-15	1.08358e-14	24.5956
STK31	1.22364	4.5203	8.23515	1.148e-15	1.12829e-14	24.555
BCAN	1.53991	3.14511	8.23514	1.1481e-15	1.12829e-14	24.555
IL4I1	0.851073	6.32006	8.23473	1.15163e-15	1.13128e-14	24.5519
ADAMDEC1	1.42001	5.65122	8.23281	1.16838e-15	1.14678e-14	24.5377
TPTE2	1.30102	1.97884	8.23247	1.17133e-15	1.1492e-14	24.5352
HBG1	-0.719658	0.183722	-8.23083	1.18585e-15	1.16295e-14	24.5231
OR7E29P	-1.21423	1.09125	-8.22777	1.2133e-15	1.18839e-14	24.5006
PABPC5	-1.00738	3.21709	-8.227	1.22032e-15	1.19427e-14	24.4949
PPP2R3B	0.603017	5.3374	8.22682	1.22194e-15	1.19535e-14	24.4936
RNF180	-0.965859	5.02419	-8.22201	1.26677e-15	1.23869e-14	24.4581
PGAM1P7	1.4355	2.48813	8.22098	1.27659e-15	1.24777e-14	24.4505
PER1	-0.504035	7.04169	-8.22042	1.28198e-15	1.25252e-14	24.4464
VN1R20P	-1.22412	1.36263	-8.21684	1.31677e-15	1.2849e-14	24.42
ZNF705A	-0.595108	0.529411	-8.21653	1.31986e-15	1.28738e-14	24.4177
ARG1	-1.07533	2.48689	-8.21313	1.35377e-15	1.31992e-14	24.3928
NPY1R	-1.52922	3.18371	-8.20944	1.39171e-15	1.35577e-14	24.3656
C14orf180	-1.03306	0.918504	-8.20602	1.42779e-15	1.39035e-14	24.3404
MIR4258	1.71572	4.46486	8.20524	1.43612e-15	1.39788e-14	24.3346
TRGV7	-1.34679	4.2865	-8.20316	1.45863e-15	1.4192e-14	24.3193
PRR7	0.890463	5.29426	8.20185	1.47291e-15	1.43246e-14	24.3097
SRSF12	1.26967	3.76883	8.19784	1.5177e-15	1.47423e-14	24.2803
DCDC2	-1.65462	4.63294	-8.19634	1.53484e-15	1.48903e-14	24.2692
C1DP2	-1.09396	0.517892	-8.19024	1.60632e-15	1.55644e-14	24.2244
KRTAP5-1	1.46623	3.89032	8.18345	1.68984e-15	1.63602e-14	24.1745
APLN	-0.909169	6.03072	-8.18176	1.71122e-15	1.65535e-14	24.1622
MYH16	1.3013	2.22098	8.17649	1.77987e-15	1.72105e-14	24.1234
S100A2	0.897752	6.6256	8.17324	1.82352e-15	1.76254e-14	24.0996
SNORD14E	1.74031	5.30907	8.17095	1.85486e-15	1.79135e-14	24.0828
PLXDC2	-0.507635	6.64058	-8.15434	2.09909e-15	2.02057e-14	23.9611
CSGALNACT2-DT	0.858524	3.63473	8.15254	2.12735e-15	2.04552e-14	23.9479
TMEM170B	-0.668777	5.41422	-8.15176	2.13964e-15	2.05623e-14	23.9423
H2AC14	1.93279	1.96626	8.15082	2.15472e-15	2.06987e-14	23.9354
RBPMS-AS1	-0.978224	5.60076	-8.14814	2.19811e-15	2.11069e-14	23.9158
HLF	-1.4361	5.55789	-8.14689	2.21858e-15	2.12686e-14	23.9066
IGHV1-17	2.13306	3.67714	8.14493	2.25121e-15	2.1555e-14	23.8923
PPIL6	-0.994414	5.04934	-8.1397	2.34034e-15	2.23902e-14	23.8541
SPATA4	-1.62711	2.34664	-8.13904	2.35186e-15	2.24912e-14	23.8492
SNRPEP2	0.665513	5.66808	8.13788	2.37232e-15	2.26684e-14	23.8407
CYP51A1	-0.672125	5.49577	-8.13636	2.39923e-15	2.29162e-14	23.8296
TAF1A-AS1	0.713744	5.01729	8.13573	2.41048e-15	2.30143e-14	23.825
TPSAB1	-0.967236	6.60922	-8.13284	2.46279e-15	2.35042e-14	23.8039
CRYGN	1.68264	3.00651	8.13245	2.46987e-15	2.35622e-14	23.801
RNU6-633P	-2.03092	1.21723	-8.13175	2.48278e-15	2.36757e-14	23.7959
MUC3A	1.82151	5.03766	8.13147	2.48786e-15	2.37145e-14	23.7939
MTAPP2	-1.15601	0.87314	-8.12909	2.53213e-15	2.41169e-14	23.7766
RIC3	-1.56243	3.58453	-8.12427	2.62431e-15	2.49746e-14	23.7414
PLEKHG6	0.773588	5.86739	8.12344	2.64068e-15	2.51202e-14	23.7353
PDE3B	-0.894438	5.2252	-8.1207	2.69485e-15	2.56147e-14	23.7153
RN7SKP18	-2.09915	2.47081	-8.11806	2.74817e-15	2.6111e-14	23.696
C22orf15	-1.60662	3.30845	-8.11738	2.76199e-15	2.62316e-14	23.6911
TCEAL6	-0.908573	0.736076	-8.11385	2.83524e-15	2.69164e-14	23.6653
NUS1P2	1.96215	2.67608	8.10948	2.92847e-15	2.77903e-14	23.6335
IGHV3OR16-13	1.70604	5.04779	8.10842	2.9515e-15	2.79963e-14	23.6258
DRC3	-0.908127	4.77344	-8.10837	2.95257e-15	2.79963e-14	23.6254
KCNK12	1.38833	1.93043	8.10741	2.97371e-15	2.81854e-14	23.6184
HACD1	-1.07268	5.41901	-8.10271	3.07909e-15	2.91607e-14	23.5841
TTC29	-2.02599	2.73892	-8.10154	3.10583e-15	2.9402e-14	23.5756
ALKBH6	0.704179	4.73226	8.09681	3.21657e-15	3.0438e-14	23.5412
FKBP1B	-0.770402	5.77921	-8.09414	3.28062e-15	3.10067e-14	23.5218
FAM131C	1.63937	2.20477	8.09076	3.3636e-15	3.17782e-14	23.4972
ALOXE3	1.39397	2.30699	8.09004	3.38158e-15	3.19352e-14	23.4919
SORD2P	1.00942	4.17624	8.08952	3.39464e-15	3.20456e-14	23.4881
MAFG-DT	0.603575	6.0883	8.08925	3.40146e-15	3.20971e-14	23.4862
FDCSP	2.12352	5.28824	8.08775	3.43932e-15	3.24413e-14	23.4753
SYDE2	-0.82932	5.00616	-8.08501	3.50982e-15	3.3093e-14	23.4553
ST3GAL6	-0.67254	5.474	-8.07579	3.75716e-15	3.53966e-14	23.3883
C16orf54	-0.791766	5.86579	-8.07279	3.84132e-15	3.61605e-14	23.3665
PHEX	-1.11093	4.10525	-8.07083	3.89719e-15	3.66423e-14	23.3523
RSPH4A	-1.53477	4.61244	-8.06394	4.10039e-15	3.84911e-14	23.3023
TIGD1	0.523702	5.73034	8.06298	4.12962e-15	3.87501e-14	23.2953
TBXA2R	-0.716701	5.07506	-8.06277	4.13605e-15	3.87949e-14	23.2938
ZNF436-AS1	0.662615	4.76976	8.05901	4.25224e-15	3.98529e-14	23.2665
ZFP92	-0.916767	4.25662	-8.05834	4.27322e-15	4.00335e-14	23.2617
FA2H	0.882196	6.30819	8.05329	4.43523e-15	4.15016e-14	23.2251
PAEP	2.55548	4.96385	8.05132	4.50005e-15	4.20746e-14	23.2108
CDC37P1	1.70741	2.34995	8.05125	4.50243e-15	4.20801e-14	23.2103
SMKR1	1.29083	5.36903	8.05018	4.53804e-15	4.2396e-14	23.2026
PDGFRL	0.615724	6.46085	8.04864	4.58979e-15	4.28624e-14	23.1914
DMD	-0.947145	4.85209	-8.04771	4.62131e-15	4.31396e-14	23.1847
BCL2A1	-0.592532	6.75276	-8.04742	4.63135e-15	4.32162e-14	23.1825
CARD11	0.758727	6.38238	8.04642	4.66555e-15	4.35179e-14	23.1753
P2RX7	-0.826839	5.58252	-8.04386	4.7542e-15	4.43096e-14	23.1568
NETO2	0.71231	6.02126	8.04163	4.83282e-15	4.50245e-14	23.1407
C9orf24	-1.77701	4.75124	-8.04142	4.84042e-15	4.50774e-14	23.1391
DNM3	-0.994551	4.36594	-8.04108	4.85266e-15	4.51734e-14	23.1366
IGFALS	-1.54873	4.35301	-8.03902	4.92675e-15	4.5845e-14	23.1217
TTBK1	0.911042	1.9146	8.03475	5.08376e-15	4.72497e-14	23.0909
METTL7B	0.93971	6.47864	8.03318	5.14305e-15	4.77819e-14	23.0795
IGKV3D-15	1.42462	6.01665	8.02906	5.30105e-15	4.9172e-14	23.0497
TEKT1	-2.23317	3.62161	-8.02663	5.39668e-15	5.00194e-14	23.0321
RPL3L	1.05977	2.07365	8.01867	5.72176e-15	5.2928e-14	22.9746
KIF6	-1.32403	2.65663	-8.01493	5.88072e-15	5.43555e-14	22.9476
LAT2	-0.538467	6.34511	-8.01129	6.04004e-15	5.58062e-14	22.9213
RGS20	1.60703	3.49193	8.01085	6.05968e-15	5.59435e-14	22.9181
MATK	-0.919331	5.10411	-8.01002	6.09674e-15	5.62415e-14	22.9121
PLAU	0.508614	7.41893	8.0095	6.12001e-15	5.64339e-14	22.9084
RNU6-1161P	2.18525	4.29459	8.00671	6.24641e-15	5.75543e-14	22.8883
JAKMIP2	-1.18985	3.47438	-8.00501	6.325e-15	5.82555e-14	22.876
C13orf42	-0.666283	0.395356	-8.00246	6.44402e-15	5.93285e-14	22.8577
PTCHD1	-1.45293	1.85851	-8.00175	6.47764e-15	5.96146e-14	22.8525
RERG	-0.8264	5.79331	-8.00125	6.50177e-15	5.98133e-14	22.8489
ANKRD36BP2	1.5883	3.95616	8.00088	6.51934e-15	5.99514e-14	22.8462
PRMT5-AS1	0.925381	2.48489	7.99887	6.61597e-15	6.08162e-14	22.8318
TPSP2	2.30838	2.16199	7.9917	6.97264e-15	6.40195e-14	22.7801
IRF8	-0.618641	6.41059	-7.99137	6.98964e-15	6.41505e-14	22.7777
ASPG	-1.7947	2.99853	-7.99073	7.02236e-15	6.44256e-14	22.7731
CASC16	1.63373	1.79369	7.98928	7.09756e-15	6.50647e-14	22.7626
PRKAR2A-AS1	0.614261	4.22354	7.98848	7.13927e-15	6.54215e-14	22.7569
IGF2BP3	1.97584	4.10481	7.98678	7.22876e-15	6.62157e-14	22.7446
MIR148A	2.33439	2.96927	7.98341	7.40935e-15	6.78434e-14	22.7204
SEMA3B-AS1	-1.0764	5.05654	-7.97918	7.64205e-15	6.98923e-14	22.69
TAS1R3	1.12526	4.81758	7.97867	7.67067e-15	7.01268e-14	22.6863
NCR1	-1.27234	2.83404	-7.97855	7.67741e-15	7.0161e-14	22.6854
SLCO3A1	-0.583178	6.23393	-7.97625	7.80781e-15	7.12972e-14	22.6689
XKR9	1.40169	4.66267	7.97188	8.06129e-15	7.35831e-14	22.6374
PDCD1LG2	-0.833388	5.79361	-7.96729	8.33595e-15	7.5972e-14	22.6045
CTNND2	-2.10191	3.02567	-7.96297	8.60354e-15	7.83804e-14	22.5734
MYADML2	1.05249	1.4117	7.96084	8.73849e-15	7.9579e-14	22.5581
C11orf91	-1.45714	2.4624	-7.95864	8.8799e-15	8.08353e-14	22.5423
RNU6-529P	-1.43294	5.06168	-7.95527	9.10105e-15	8.27843e-14	22.5181
CPNE4	1.55426	3.70494	7.95133	9.36624e-15	8.50317e-14	22.4899
AQP4	-1.83738	6.30108	-7.95098	9.39026e-15	8.52168e-14	22.4874
EPYC	2.07125	2.66854	7.94319	9.93939e-15	9.00956e-14	22.4315
AKR1B10	2.55628	4.56784	7.94226	1.0007e-14	9.06383e-14	22.4248
HSPE1P2	1.32902	4.02743	7.94101	1.00985e-14	9.14321e-14	22.4159
PTN	-0.953431	6.05779	-7.93827	1.0302e-14	9.3238e-14	22.3963
NOX1	0.791099	4.53799	7.93614	1.04632e-14	9.46314e-14	22.381
RSKR	0.919586	4.79961	7.93577	1.04914e-14	9.48427e-14	22.3783
SEC14L4	-1.46386	5.07808	-7.93337	1.06762e-14	9.64396e-14	22.3612
BVES	-0.933942	4.25927	-7.93279	1.07214e-14	9.68102e-14	22.357
STEAP2-AS1	1.44604	1.67073	7.9283	1.10779e-14	9.9952e-14	22.3249
LPAL2	-1.23577	4.08495	-7.92719	1.11679e-14	1.00726e-13	22.3169
MNX1-AS2	2.00359	4.02726	7.92258	1.15481e-14	1.04075e-13	22.284
ECT2L	-1.5606	3.23296	-7.9223	1.15721e-14	1.04251e-13	22.2819
NHLH2	-1.48756	1.53249	-7.91514	1.21907e-14	1.0974e-13	22.2307
FLRT1	1.15988	2.67764	7.9141	1.22827e-14	1.10526e-13	22.2233
RTN4RL2	1.13914	5.93642	7.9098	1.26726e-14	1.13859e-13	22.1926
RTBDN	1.82787	2.1324	7.90262	1.33509e-14	1.19816e-13	22.1413
AKR1B15	2.30497	2.8503	7.89999	1.36087e-14	1.22036e-13	22.1225
LMO7DN	-1.40017	2.47835	-7.89901	1.37058e-14	1.22813e-13	22.1156
CCK	-1.76347	1.67122	-7.89761	1.38457e-14	1.2402e-13	22.1056
ATP8A2	-1.36166	3.71667	-7.89699	1.39087e-14	1.24537e-13	22.1011
HMGA1P1	1.27355	1.68799	7.89088	1.45385e-14	1.30126e-13	22.0576
LRP8	0.707649	5.47597	7.88957	1.46774e-14	1.31269e-13	22.0482
CFAP65	-1.69491	2.91747	-7.88604	1.50581e-14	1.34468e-13	22.023
FGF18	-1.29837	4.6141	-7.88475	1.51994e-14	1.35679e-13	22.0139
LCE2A	-0.6181	0.15663	-7.8841	1.52706e-14	1.36211e-13	22.0093
VSX1	1.48052	1.7175	7.88236	1.54644e-14	1.37835e-13	21.9969
LRRC25	-0.649958	6.27981	-7.8812	1.55949e-14	1.38892e-13	21.9886
CCL24	-1.40892	5.14809	-7.88052	1.56728e-14	1.3948e-13	21.9837
PKIA	-0.963519	5.50331	-7.87835	1.59207e-14	1.41579e-13	21.9683
PTX3	-1.11388	4.90179	-7.87527	1.62792e-14	1.44603e-13	21.9464
RNF183	1.98556	3.37511	7.87339	1.65024e-14	1.46474e-13	21.933
MX2	0.618593	6.25088	7.87287	1.65647e-14	1.46861e-13	21.9293
RN7SL221P	1.72061	3.55396	7.86976	1.69426e-14	1.50154e-13	21.9071
CLPSL1	2.15244	2.2273	7.86108	1.80405e-14	1.59643e-13	21.8454
DLG3-AS1	1.2381	3.47952	7.86099	1.80513e-14	1.59679e-13	21.8448
EGR3	-0.945779	5.41162	-7.85639	1.86622e-14	1.64896e-13	21.8121
SATB1	-0.683577	5.6813	-7.85599	1.87162e-14	1.65311e-13	21.8093
CKLF-CMTM1	0.754297	3.65579	7.85208	1.92519e-14	1.69915e-13	21.7815
METTL21C	-1.12302	0.973527	-7.85029	1.95038e-14	1.72073e-13	21.7687
EXOSC10-AS1	0.892601	4.36697	7.84634	2.0068e-14	1.76985e-13	21.7407
FER	-0.504316	5.43013	-7.84626	2.00792e-14	1.77017e-13	21.7402
MIR6797	2.07901	4.18868	7.84563	2.0171e-14	1.77759e-13	21.7357
DYNLRB2	-1.65801	4.07874	-7.84487	2.02822e-14	1.78672e-13	21.7303
STOML3	-2.146	3.25473	-7.84233	2.06567e-14	1.81835e-13	21.7123
C1QTNF1-AS1	-1.38704	1.41899	-7.84217	2.06806e-14	1.81863e-13	21.7112
FOXI3	2.29828	2.52917	7.84216	2.06818e-14	1.81863e-13	21.7111
SGK2	1.37854	4.24177	7.84215	2.06831e-14	1.81863e-13	21.711
HMGB2P1	1.54079	2.97696	7.84119	2.08267e-14	1.83057e-13	21.7042
MECOM-AS1	-1.75817	3.12964	-7.83825	2.12744e-14	1.86922e-13	21.6833
RTN4RL1	-1.5138	4.65961	-7.83529	2.17336e-14	1.90885e-13	21.6623
RPL21P135	-1.2861	2.07752	-7.83389	2.19538e-14	1.92746e-13	21.6524
MTFR2	0.844833	5.25147	7.83378	2.19705e-14	1.92821e-13	21.6517
PRPH	-1.26907	1.70145	-7.83291	2.21089e-14	1.93891e-13	21.6455
SNHG25	0.913329	5.46941	7.83271	2.21417e-14	1.94105e-13	21.6441
SLC6A12	-1.03428	4.32223	-7.83237	2.2196e-14	1.9451e-13	21.6416
PCDH11X	-0.611397	0.434173	-7.82961	2.26422e-14	1.98346e-13	21.6221
FUT8-AS1	0.933319	4.21094	7.82873	2.2786e-14	1.9953e-13	21.6159
CES1P1	-1.75645	2.35605	-7.82655	2.31458e-14	2.02605e-13	21.6005
HPR	-1.541	2.28071	-7.82037	2.42002e-14	2.1152e-13	21.5567
DST	-0.765676	5.99068	-7.81627	2.49252e-14	2.17776e-13	21.5277
LRRC4	-1.10062	5.48252	-7.81249	2.5613e-14	2.23369e-13	21.5009
SLC26A1	0.718163	5.04493	7.81018	2.60421e-14	2.26942e-13	21.4846
ESPN	1.35421	5.55754	7.80839	2.638e-14	2.29801e-13	21.4719
LYL1	-0.615751	5.68742	-7.8083	2.63963e-14	2.29859e-13	21.4713
TRGC2	-1.1289	4.7961	-7.80798	2.64565e-14	2.30297e-13	21.4691
CPNE5	0.799028	5.58454	7.80466	2.70967e-14	2.35695e-13	21.4456
CACNG1	-1.32536	1.37814	-7.80306	2.74101e-14	2.38333e-13	21.4343
SNHG31	1.18973	3.55046	7.80134	2.77505e-14	2.41203e-13	21.4221
SCARNA21	2.06383	4.01929	7.79799	2.84278e-14	2.46908e-13	21.3984
SRGAP3-AS2	-2.44227	3.48205	-7.79447	2.91556e-14	2.52668e-13	21.3736
DNASE1L2	1.15512	3.24128	7.79334	2.93919e-14	2.54621e-13	21.3657
CDHR3	-1.68499	4.54462	-7.79204	2.96684e-14	2.56827e-13	21.3565
KCTD21-AS1	0.7795	4.0749	7.79061	2.99737e-14	2.59374e-13	21.3464
NEK5	-1.18053	3.76948	-7.78938	3.02398e-14	2.6158e-13	21.3377
ROPN1L	-1.5708	4.4457	-7.78761	3.06261e-14	2.64825e-13	21.3252
[truncated: 3,376 more rows]
